# Supplementary material for: Fundamental curiosity of multivicinal inter-halide stereocenters
Source: Royal Society of Chemistry journal article supplement (doi:10.1039/d2qo01433e), 2022-01-01
Supplement: d2qo01433e1.pdf [file d2qo01433e1.pdf]

Electronic Supporting Information

**Fundamental Curiosity of Multivincinal Inter-Halide Stereocenters**

Olivier Lessard, Danny Lainé, Charles-Émile Fecteau, Paul A. Johnson, Denis Giguère\*

*Département de Chimie, 1045 av. De la Médecine, Université Laval, Québec City, Qc,  
Canada G1V 0A6, PROTEO*

*E-Mail: [denis.giguere@ulaval.ca](mailto:denis.giguere@ulaval.ca)*

## Table of contents

|      |                                                                    |      |
|------|--------------------------------------------------------------------|------|
| I.   | Experimental section                                               | S2   |
| II.  | Crystal structure determination                                    | S28  |
| III. | NMR spectra of compounds                                           | S30  |
| IV.  | Solution-state conformation                                        | S97  |
| V.   | Log <i>P</i> determination using <sup>19</sup> F NMR               | S101 |
| VI.  | Density functional theory calculations on Pitolisant and analogues | S112 |
| VII. | References                                                         | S117 |

## I. Experimental section

### General methods

All reactions were carried out under an argon atmosphere with dry solvents under anhydrous conditions, unless otherwise noted. Dry dichloromethane ( $\text{CH}_2\text{Cl}_2$ ) was obtained by passing commercially available pre-dried, oxygen-free formulations through activated alumina columns using a Vacuum Atmospheres Inc. Solvent Purification System. Yields refer to chromatographically and spectroscopically ( $^1\text{H}$  NMR) homogeneous materials, unless otherwise stated. Reagents were purchased at the highest commercial quality available and used without further purification, unless otherwise stated. Reactions were monitored by thin-layer chromatography (TLC) carried out on 0.25 mm E. Merck silica gel plates (60F-254) using UV light as visualizing agent and charring with a  $\text{KMnO}_4$  solution (1.5 g of  $\text{KMnO}_4$ , 10 g  $\text{K}_2\text{CO}_3$ , and 1.25 mL 10 %  $\text{NaOH}$  in 200 mL of water), a phenol solution (3 g of phenol in 95 mL of  $\text{EtOH}$  and 5 mL of sulfuric acid), or a phenol/ $\text{Ac}_2\text{O}$  solution (3 g of phenol in 95 mL of  $\text{Ac}_2\text{O}$  and 5 mL of sulfuric acid) followed by heating with a heatgun as developing agents. SiliaFlash® P60 (particle size 40–63  $\mu\text{m}$ , 230–400 mesh) was used for flash column chromatography. NMR spectra were recorded on an Agilent DD2 spectrometer (at 500 MHz for  $^1\text{H}$ , 470 MHz for  $^{19}\text{F}$ , and 126 MHz for  $^{13}\text{C}$ ) and calibrated using residual undeuterated solvent peaks ( $\text{CDCl}_3$   $^1\text{H}$   $\delta = 7.26$  ppm,  $^{13}\text{C}$   $\delta = 77.16$  ppm; acetone- $d_6$ :  $^1\text{H}$   $\delta = 2.05$  ppm,  $^{13}\text{C}$   $\delta = 29.84$  ppm) as an internal reference.  $^{19}\text{F}$  NMR spectra were calibrated using hexafluorobenzene, which gives a signal at  $^{19}\text{F}$   $\delta = -162.29$  ppm with respect to that of the reference compound  $\text{CFCl}_3$ . Coupling constants ( $J$ ) are reported in Hertz (Hz), and the following abbreviations were used to designate multiplicities: s = singlet, d = doublet, t = triplet, q = quartet, p = quintet, m = multiplet, br = broad. Assignments of NMR signals were made by homonuclear (COSY) and heteronuclear (HSQC, HMBC, and  $^{19}\text{F}$  gc2HSQC) two-dimensional correlation spectroscopy. Infrared (IR) spectra were recorded using an ABB MB3000 Spectrometer with a diamond crystal plate, or Bomem MB100 Arid zone with a  $\text{NaCl}$  disk. The absorptions are given in wavenumbers ( $\text{cm}^{-1}$ ). High resolution mass spectra (HRMS) were measured with an Agilent 6210 LC Time of Flight mass spectrometer in electrospray mode (ESI). Either protonated molecular ions  $[\text{M} + n\text{H}]^{n+}$ , sodium adducts  $[\text{M} + \text{Na}]^+$ , ammonium adducts  $[\text{M} + \text{NH}_4]^+$  or deprotonated molecular ions  $[\text{M} - n\text{H}]^{n-}$  were used for empirical formula

confirmation. Optical rotations were recorded on a JASCO DIP-360 digital polarimeter at 589 nm and are reported in units of  $10^{-1}$  (deg cm<sup>2</sup> g<sup>-1</sup>). Melting points were measured on a Stanford Research System OptiMelt MPA100 151 automated melting point apparatus.

## General procedures

### General procedure I: Hydrolysis of 1,6-anhydro-difluorohalogenohexopyranose analogues

To a stirred solution of the starting 1,6-anhydro-difluorohalogenohexopyranose in a specified volume of CH<sub>2</sub>Cl<sub>2</sub> at 0 °C, was added dropwise a specified volume of a 1 M solution of BCl<sub>3</sub> in CH<sub>2</sub>Cl<sub>2</sub>. The mixture was stirred, under an argon atmosphere, at room temperature for 2 h. The reaction mixture was cooled at 0 °C, a specified volume of H<sub>2</sub>O was added, and the organic solvent was removed under reduced pressure. The resulting mixture was stirred at room temperature for 1 h, and the remaining water was evaporated under a gentle stream of air.

### General procedure II: Reduction of difluorohalogenohexopyranose analogues

A specified amount of NaBH<sub>4</sub> was added to a stirred solution of the starting difluorohalogenohexopyranose in anhydrous EtOH. The resulting mixture was stirred at room temperature for 1 h and was neutralized to pH  $\approx$  7 with acidic resin. The mixture was filtered and concentrated under reduced pressure.

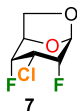

**1,6-Anhydro-2,3,4-trideoxy-3-chloro-2,4-difluoro- $\beta$ -D-allopyranose (7).** To a solution of 1,6-anhydro-2,4-difluoro-2,4-difluoro- $\beta$ -D-glucopyranose **4**<sup>1</sup> (390.6 mg, 2.351 mmol, 1.0 equiv.) in CH<sub>2</sub>Cl<sub>2</sub> (11.8 mL, 0.2 M) at 0 °C under an argon atmosphere was added pyridine (0.76 mL, 9.404 mmol, 4.0 equiv.) and Tf<sub>2</sub>O (0.79 mL, 4.702 mmol, 2.0 equiv.). The mixture was stirred at room temperature for 30 min and then quenched with a saturated aqueous NaHCO<sub>3</sub> solution. The mixture was extracted with CH<sub>2</sub>Cl<sub>2</sub> and the combined organic phases were successively washed with aqueous 1 M HCl solution and brine. The

organic solution was dried over MgSO<sub>4</sub>, filtered, and concentrated under reduced pressure. The crude triflate **5** was used for the next step without further purification and dissolved in MeCN (1.1 mL, 0.2 M) in a sealed tube. Me<sub>4</sub>NCl (236 mg, 2.151 mmol, 10 equiv.) was added, and the tube was sealed and stirred at 100 °C for 7 days. After cooling down to room temperature, the mixture was quenched with H<sub>2</sub>O and extracted with CH<sub>2</sub>Cl<sub>2</sub>. The combined organic phases were washed with brine, dried over MgSO<sub>4</sub>, filtered, and concentrated under reduced pressure. The obtained crude was purified by flash column chromatography (silica gel, EtOAc/hexanes 1:3 → 1:1) to give **7** as a white amorphous solid (30.2 mg, 0.1636 mmol, 73 % yield over 2 steps): R<sub>f</sub> = 0.38 (silica, EtOAc/hexanes 2:3); [α]<sub>D</sub><sup>25</sup> = -73.1 (c 0.4, CHCl<sub>3</sub>); IR (ATR, diamond crystal) ν 2978, 2916, 1327, 1134, 1057, 748 cm<sup>-1</sup>; <sup>1</sup>H NMR (500 MHz, CDCl<sub>3</sub>) δ 5.66 (dd, *J* = 1.9, 1.9 Hz, 1H, H1), 4.88 (ddd, *J* = 6.0, 5.9, 2.7 Hz, 1H, H5), 4.60 (ddd, *J* = 47.6, 3.2, 3.2 Hz, 1H, H4), 4.49 (ddd, *J* = 48.6, 3.4, 3.1 Hz, 1H, H2), 4.14 (dddd, *J* = 29.0, 27.2, 3.8, 3.8 Hz, 1H, H3), 3.86 (dddd, *J* = 8.2, 5.2, 5.2, 2.5 Hz, 1H, H6a), 3.78 (ddd, *J* = 8.6, 1.0, 1.0 Hz, 1H, H6b) ppm; <sup>13</sup>C {<sup>1</sup>H} NMR (126 MHz, CDCl<sub>3</sub>) δ 99.0 (d, *J* = 24.8 Hz, 1C, C1), 86.9 (dd, *J* = 193.2, 1.0 Hz, 1C, C4), 85.9 (dd, *J* = 194.1, 1.0 Hz, 1C, C2), 74.6 (d, *J* = 19.6 Hz, 1C, C5), 64.1 (d, *J* = 6.1 Hz, 1C, C6), 51.2 (dd, *J* = 19.5, 19.1 Hz, 1C, C3) ppm; <sup>19</sup>F NMR (470 MHz, CDCl<sub>3</sub>) δ -194.93 (dddddd, *J* = 47.0, 29.0, 6.4, 6.3, 6.2, 1.0 Hz, 1F, F4), -198.04 (dddd, *J* = 48.8, 27.0, 8.4, 2.3 Hz, 1F, F2) ppm; the compound does not ionize.

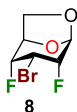

**1,6-Anhydro-2,3,4-trideoxy-3-bromo-2,4-difluoro-β-D-allopyranose (8).** To a solution of 1,6-anhydro-2,4-difluoro-2,4-difluoro-β-D-glucopyranose **4** (101.8 mg, 0.6128 mmol, 1.0 equiv.) in CH<sub>2</sub>Cl<sub>2</sub> (3.0 mL, 0.2 M) at 0 °C under an argon atmosphere was added pyridine (0.20 mL, 2.452 mmol, 4.0 equiv.) and Tf<sub>2</sub>O (0.21 mL, 1.226 mmol, 2.0 equiv.). The mixture was stirred at room temperature for 30 min and then quenched with a saturated aqueous NaHCO<sub>3</sub> solution. The mixture was extracted with CH<sub>2</sub>Cl<sub>2</sub> and the combined organic phases were successively washed with aqueous 1 M HCl solution and brine. The organic solution was dried over MgSO<sub>4</sub>, filtered, and concentrated under reduced pressure.

The crude triflate **5** was used for the next step without further purification and dissolved in DMF (2.6 mL, 0.22 M) in a sealed tube. Bu<sub>4</sub>NBr (1.882 g, 5.840 mmol, 10 equiv.) was added, and the tube was sealed and stirred at 120 °C for 16 h. After cooling down to room temperature, the mixture was quenched with H<sub>2</sub>O, and extracted with CH<sub>2</sub>Cl<sub>2</sub>. The combined organic phases were washed with brine, dried over MgSO<sub>4</sub>, filtered, and concentrated under reduced pressure. The obtained crude was purified by flash column chromatography (silica gel, EtOAc/hexanes 1:2 → 2:3) to give **8** as a pale yellow amorphous solid (124.0 mg, 0.5414 mmol, 88 % yield over 2 steps): R<sub>f</sub> = 0.40 (silica, EtOAc/hexanes 2:3); [α]<sub>D</sub><sup>25</sup> = -58.1 (c 0.3, CHCl<sub>3</sub>); IR (ATR, diamond crystal) ν 2970, 2916, 2854, 1335, 1126, 1057 cm<sup>-1</sup>; <sup>1</sup>H NMR (500 MHz, CDCl<sub>3</sub>) δ 5.65 (dd, *J* = 2.6, 1.2 Hz, 1H, H1), 4.89 (dddd, *J* = 6.0, 5.6, 2.9, 0.6 Hz, 1H, H5), 4.57 (ddd, *J* = 47.2, 3.1, 3.1 Hz, 1H, H4), 4.46 (ddd, *J* = 48.4, 3.2, 2.9 Hz, 1H, H2), 4.21 (dddd, *J* = 30.6, 28.7, 3.8, 3.8 Hz, 1H, H3), 3.87 (dddd, *J* = 10.8, 5.2, 3.1, 2.4 Hz, 1H, H6b), 3.81 (ddd, *J* = 8.5, 1.1, 1.1 Hz, 1H, H6a) ppm; <sup>13</sup>C {<sup>1</sup>H} NMR (126 MHz, CDCl<sub>3</sub>) δ 99.2 (d, *J* = 25.8 Hz, 1C, C1), 86.9 (dd, *J* = 192.4, 1.0 Hz, 1C, C4), 86.0 (dd, *J* = 193.0, 1.2 Hz, 1C, C2), 74.8 (d, *J* = 20.3 Hz, 1C, C5), 64.2 (d, *J* = 5.9 Hz, 1C, C6), 41.3 (dd, *J* = 20.0, 20.0 Hz, 1C, C3) ppm; <sup>19</sup>F NMR (470 MHz, CDCl<sub>3</sub>) δ -188.82 (dddd, *J* = 46.9, 30.6, 6.2, 6.0, 6.0 Hz, 1F, F4), -192.43 (dddd, *J* = 48.2, 28.6, 7.4, 2.5 Hz, 1F, F2) ppm; the compound does not ionize.

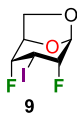

**1,6-Anhydro-2,3,4-trideoxy-2,4-difluoro-3-iodo-β-D-allopyranose (9).** To a solution of 1,6-anhydro-2,4-difluoro-2,4-difluoro-β-D-glucopyranose **4** (390.7 mg, 2.352 mmol, 1.0 equiv.) in CH<sub>2</sub>Cl<sub>2</sub> (11.8 mL, 0.2 M) at 0 °C under an argon atmosphere was added pyridine (0.76 mL, 9.408 mmol, 4.0 equiv.) and Tf<sub>2</sub>O (0.79 mL, 4.704 mmol, 2.0 equiv.). The mixture was stirred at room temperature for 30 min and then quenched with a saturated aqueous NaHCO<sub>3</sub> solution. The mixture was extracted with CH<sub>2</sub>Cl<sub>2</sub> and the combined organic phases were successively washed with aqueous 1 M HCl solution and brine. The organic solution was dried over MgSO<sub>4</sub>, filtered, and concentrated under reduced pressure. The crude triflate **5** was used for the next step without further purification and dissolved in

DMF (11 mL, 0.2 M) in a sealed tube. Bu<sub>4</sub>NI (8.881 g, 22.41 mmol, 10 equiv.) was added, and the tube was sealed and stirred at 120 °C for 16 h. After cooling down to room temperature, the mixture was quenched with H<sub>2</sub>O, and extracted with CH<sub>2</sub>Cl<sub>2</sub>. The combined organic phases were washed with brine, dried over MgSO<sub>4</sub>, filtered, and concentrated under reduced pressure. The obtained crude was purified by flash column chromatography (silica gel, EtOAc/hexanes 1:3 → 1:1) to give **9** as a pale yellow amorphous solid (558.0 mg, 2.022 mmol, 86 % yield over 2 steps): *R<sub>f</sub>* = 0.46 (silica, EtOAc/hexanes 2:3); [α]<sub>D</sub><sup>25</sup> = -56.6 (c 0.5, CHCl<sub>3</sub>); IR (ATR, diamond crystal) ν 2978, 2916, 1327, 1126, 1041, 987 cm<sup>-1</sup>; <sup>1</sup>H NMR (500 MHz, CDCl<sub>3</sub>) δ 5.59 (dd, *J* = 2.3, 0.7 Hz, 1H, H1), 4.83 (dddd, *J* = 6.3, 5.0, 2.5, 0.8 Hz, 1H, H5), 4.46 (ddd, *J* = 46.8, 3.3, 3.3 Hz, 1H, H4), 4.40 (dddd, *J* = 33.0, 31.3, 3.9, 3.5 Hz, 1H, H3), 4.35 (dddd, *J* = 47.5, 3.2, 3.2, 0.7 Hz, 1H, H2), 3.88 (dddd, *J* = 8.3, 7.5, 5.0, 2.5 Hz, 1H, H6b), 3.85 (ddd, *J* = 8.1, 0.6, 0.6 Hz, 1H, H6a) ppm; <sup>13</sup>C {<sup>1</sup>H} NMR (126 MHz, CDCl<sub>3</sub>) δ 98.9 (d, *J* = 27.1 Hz, 1C, C1), 87.5 (dd, *J* = 190.5, 1.3 Hz, 1C, C4), 86.6 (dd, *J* = 191.0, 0.8 Hz, 1C, C2), 74.7 (d, *J* = 20.9 Hz, 1C, C5), 64.4 (d, *J* = 6.3 Hz, 1C, C6), 17.4 (dd, *J* = 21.2, 21.2 Hz, 1C, C3) ppm; <sup>19</sup>F NMR (470 MHz, CDCl<sub>3</sub>) δ -178.25 (dddddd, *J* = 46.4, 33.2, 5.7, 5.0, 5.0, 0.9 Hz, 1F, F4), -182.60 (dddd, *J* = 47.5, 31.3, 5.7, 2.3 Hz, 1F, F2) ppm; the compound does not ionize.

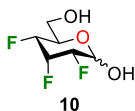

**2,3,4-Trideoxy-2,3,4-trifluoro- $\alpha/\beta$ -D-allopyranose (10).** The known 1,6-anhydro-2,3,4-trideoxy-2,3,4-trifluoro- $\beta$ -D-allopyranose **6**<sup>1</sup> (218.3 mg, 1.299 mmol, 1.0 equiv.) was hydrolysed with BCl<sub>3</sub> (1 M in CH<sub>2</sub>Cl<sub>2</sub>, 6.5 mL, 6.495 mmol, 5.0 equiv.) in CH<sub>2</sub>Cl<sub>2</sub> (13 mL, 0.1 M) and water (46 mL, 2.554 mmol, 2.0 equiv.) following the general procedure I. The obtained crude was purified by flash column chromatography (silica gel, EtOAc/hexanes 4:1) to give an anomeric mixture of **10** ( $\alpha/\beta$  1:13) as a white amorphous solid (232.1 mg, 1.247 mmol, 96 % yield). The spectroscopic data derived from compound **10** match those reported in the literature.<sup>1</sup>

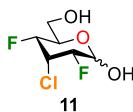

**2,3,4-Trideoxy-3-chloro-2,4-difluoro- $\alpha/\beta$ -D-allopyranose (11).** 1,6-Anhydro-2,3,4-trideoxy-3-chloro-2,4-difluoro- $\beta$ -D-allopyranose **7** (78.0 mg, 0.4226 mmol, 1.0 equiv.) was hydrolysed with  $\text{BCl}_3$  (1 M in  $\text{CH}_2\text{Cl}_2$ , 2.2 mL, 2.113 mmol, 5.0 equiv.) in  $\text{CH}_2\text{Cl}_2$  (4.2 mL, 0.1 M) and water (15 mL, 0.8304 mmol, 2.0 equiv.) following the general procedure I. The obtained crude was purified by flash column chromatography (silica gel, EtOAc/hexanes 3:2  $\rightarrow$  4:1) to give an anomeric mixture of **11** ( $\alpha/\beta$  1:19) as a white amorphous solid (60.0 mg, 0.2962 mmol, 70 % yield):  $R_f = 0.39$  (silica, EtOAc/hexanes 4:1);  $[\alpha]_D^{25} = -9.34$  (c 0.4, MeOH); IR (ATR, diamond crystal)  $\nu$  3340, 3117, 2901, 1342, 1142, 1018, 656  $\text{cm}^{-1}$ ; only the  $\beta$  anomer has been attributed in  $^1\text{H}$  NMR,  $^{13}\text{C}$  NMR, and  $^{19}\text{F}$  NMR;  $^1\text{H}$  NMR (500 MHz, Acetone- $d_6$ )  $\delta$  6.37 (d,  $J = 6.3$  Hz, 1H, OH1), 5.16 (ddd,  $J = 7.2, 6.3, 1.3$  Hz, 1H, H1), 5.09 (dddd,  $J = 7.3, 7.3, 3.5, 3.5$  Hz, 1H, H3), 4.92 (dddd,  $J = 46.2, 8.7, 3.5, 1.4$  Hz, 1H, H4), 4.48 (dddd,  $J = 46.9, 7.2, 3.5, 1.5$  Hz, 1H, H2), 3.98 (ddd,  $J = 7.4, 4.6, 4.4, 2.5$  Hz, 1H, H5), 3.96 (dd,  $J = 6.5, 6.5$  Hz, 1H, OH6), 3.83 (dddd,  $J = 12.3, 5.6, 2.3, 2.3$  Hz, 1H, H6b), 3.67 (dddd,  $J = 12.2, 7.1, 4.3, 2.2$  Hz, 1H, H6a) ppm;  $^{13}\text{C}$   $\{^1\text{H}\}$  NMR (126 MHz, Acetone- $d_6$ )  $\delta$  92.0 (d,  $J = 22.9$  Hz, 1C, C1), 87.3 (dd,  $J = 194.4, 3.9$  Hz, 1C, C2), 83.7 (dd,  $J = 190.8, 3.7$  Hz, 1C, C4), 72.6 (d,  $J = 23.1$  Hz, 1C, C5), 60.4 (d,  $J = 1.1$  Hz, 1C, C6), 59.9 (dd,  $J = 17.4, 17.4$  Hz, 1C, C3) ppm;  $^{19}\text{F}$  NMR (470 MHz, Acetone- $d_6$ )  $\delta$  -194.85 (dddd,  $J = 47.0, 7.5, 3.9, 1.2$  Hz, 1F, F1), -196.25 (dddd,  $J = 46.0, 7.3, 4.6, 2.3, 2.2$  Hz, 1F, F4) ppm; HRMS calcd for  $\text{C}_6\text{H}_8\text{ClF}_2\text{O}_3^-$  [ $\text{M} - \text{H}$ ] 201.0136 found 201.0140.

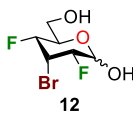

**2,3,4-Trideoxy-3-bromo-2,4-difluoro- $\alpha/\beta$ -D-allopyranose (12).** 1,6-Anhydro-2,3,4-trideoxy-3-bromo-2,4-difluoro- $\beta$ -D-allopyranose **8** (165.00 mg, 0.7205 mmol, 1.0 equiv.) was hydrolysed with  $\text{BCl}_3$  (1 M in  $\text{CH}_2\text{Cl}_2$ , 3.6 mL, 3.602 mmol, 5.0 equiv.) in  $\text{CH}_2\text{Cl}_2$  (7.2 mL, 0.1 M) and water (25.5 mL, 1.416 mmol, 2.0 equiv.) following the general procedure I. The obtained crude was purified by flash column chromatography (silica gel,



EtOAc/hexanes 3:2 → 4:1) to give an anomeric mixture of **12** ( $\alpha/\beta$  1:17) as a white amorphous solid (160.0 mg, 0.6477 mmol, 90 % yield):  $R_f = 0.42$  (silica, EtOAc/hexanes 4:1);  $[\alpha]_D^{25} = -10.5$  (c 0.5, MeOH); IR (ATR, diamond crystal)  $\nu$  3340, 2932, 1443, 1080, 1030, 1011  $\text{cm}^{-1}$ ; only the  $\beta$  anomer has been attributed in  $^1\text{H}$  NMR,  $^{13}\text{C}$  NMR, and  $^{19}\text{F}$  NMR;  $^1\text{H}$  NMR (500 MHz, Acetone- $d_6$ )  $\delta$  6.38 (d,  $J = 6.5$  Hz, 1H, OH1), 5.18 (ddd,  $J_2 = 6.8, 6.7, 1.4$  Hz, 1H, H1), 5.14 (dddd,  $J = 7.4, 7.4, 3.6, 3.6$  Hz, 1H, H3), 4.78 (dddd,  $J = 46.5, 8.6, 3.5, 1.2$  Hz, 1H, H4), 4.37 (dddd,  $J = 47.4, 6.9, 3.5, 1.5$  Hz, 1H, H2), 3.99 (ddd,  $J = 8.6, 3.8, 3.3$  Hz, 1H, H5), 3.98 (dd,  $J = 6.7, 5.5$  Hz, 1H, OH6), 3.82 (dddd,  $J = 12.2, 5.1, 5.0, 2.3$  Hz, 1H, H6a), 3.68 (dddd,  $J = 12.2, 6.5, 4.3, 2.2$  Hz, 1H, H6b) ppm;  $^{13}\text{C}$  { $^1\text{H}$ } NMR (126 MHz, Acetone- $d_6$ )  $\delta$  93.7 (d,  $J = 22.6$  Hz, 1C, C1), 87.7 (dd,  $J = 193.6, 4.2$  Hz, 1C, C2), 84.2 (dd,  $J = 190.0, 3.6$  Hz, 1C, C4), 74.7 (d,  $J = 22.5$  Hz, 1C, C5), 61.3 (s, 1C, C6), 53.9 (dd,  $J = 17.5, 17.5$  Hz, 1C, C3) ppm;  $^{19}\text{F}$  NMR (470 MHz, Acetone- $d_6$ )  $\delta$  -189.77 (dddd,  $J = 47.4, 7.6, 3.9, 1.4$  Hz, 1F, F2), -190.73 (dddd,  $J = 46.6, 7.4, 2.3, 2.2$  Hz, 1F, F4) ppm; HRMS calcd for  $\text{C}_6\text{H}_8\text{BrF}_2\text{O}_3^-$  [M - H] $^-$  244.9630 found 244.9636.

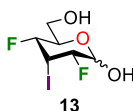

**2,3,4-Trideoxy-2,4-difluoro-3-iodo- $\alpha/\beta$ -D-allopyranose (13).** 1,6-Anhydro-2,3,4-trideoxy-2,4-difluoro-3-iodo- $\beta$ -D-allopyranose **9** (100.5 mg, 0.3641 mmol, 1.0 equiv.) was hydrolysed with  $\text{BCl}_3$  (1 M in  $\text{CH}_2\text{Cl}_2$ , 2.9 mL, 2.113 mmol, 8.0 equiv.) in  $\text{CH}_2\text{Cl}_2$  (3.6 mL, 0.1 M) and water (12.9 mL, 0.7155 mmol, 2.0 equiv.) following the general procedure I. The obtained crude was purified by flash column chromatography (silica gel, EtOAc/hexanes 3:2 → 4:1) to give an anomeric mixture of **13** ( $\alpha/\beta$  1:16) as a white amorphous solid (85.4 mg, 0.2904 mmol, 80 % yield):  $R_f = 0.46$  (silica, EtOAc/hexanes 4:1);  $[\alpha]_D^{25} = -13.5$  (c 0.5, MeOH); IR (ATR, diamond crystal)  $\nu$  3340, 2925, 1327, 1095, 1080, 1026  $\text{cm}^{-1}$ ; only the  $\beta$  anomer has been attributed in  $^1\text{H}$  NMR,  $^{13}\text{C}$  NMR, and  $^{19}\text{F}$  NMR;  $^1\text{H}$  NMR (500 MHz, Acetone- $d_6$ )  $\delta$  6.38 (d,  $J = 6.4$  Hz, 1H, OH1), 5.17 (dddd,  $J = 9.4, 9.4, 3.8, 3.8$  Hz, 1H, H3), 5.14 (ddd,  $J = 6.4, 6.3, 2.3$  Hz, 1H, H1), 4.26 (dddd,  $J = 47.2, 7.6, 3.8, 1.1$  Hz, 1H, H4), 4.01 (dd,  $J = 6.7, 5.5$  Hz, 1H, OH6), 3.94 (dddd,  $J = 7.8, 4.6, 4.3, 3.2$  Hz, 1H, H5), 3.92 (dddd,  $J = 48.0, 6.3, 3.9, 1.1$  Hz, 1H, H2), 3.82 (dddd,  $J = 12.2, 5.5, 3.5,$

1.7 Hz, 1H, H6a), 3.69 (dddd,  $J = 12.2, 6.8, 4.4, 2.3$  Hz, 1H, H6a) ppm;  $^{13}\text{C}$   $\{^1\text{H}\}$  NMR (126 MHz, Acetone- $d_6$ )  $\delta$  94.9 (d,  $J = 23.2$  Hz, 1C, C1), 87.7 (dd,  $J = 191.4, 4.0$  Hz, 1C, C2), 84.6 (dd,  $J = 188.5, 3.9$  Hz, 1C, C4), 76.6 (d,  $J = 21.9$  Hz, 1C, C5), 61.5 (s, 1C, C6), 33.2 (dd,  $J = 18.1, 18.1$  Hz, 1C, C3) ppm;  $^{19}\text{F}$  NMR (470 MHz, Acetone- $d_6$ )  $\delta$  -181.06 (dddddd,  $J = 47.3, 9.4, 4.6, 4.4, 2.3, 1.7$  Hz, 1F, F4), -181.31 (dddd,  $J = 48.4, 9.3, 4.4, 2.0$  Hz, 1F, F2) ppm; HRMS calcd for  $\text{C}_6\text{H}_8\text{F}_2\text{IO}_3^-$   $[\text{M} - \text{H}]^-$  292.9492 found 292.9495.

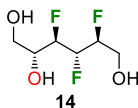

**2,3,4-Trideoxy-2,3,4-trifluoro-D-allitol (14).** 2,3,4-Trideoxy-2,3,4-trifluoro- $\alpha/\beta$ -D-allopyranose **10** (192 mg, 1.032 mmol, 1.0 equiv.) was reduced with  $\text{NaBH}_4$  (68.3 mg, 1.805 mmol, 1.75 equiv.) in anhydrous EtOH (10 mL, 0.1 M) following the general procedure II. The obtained crude was purified by flash column chromatography (silica gel, MeOH/ $\text{CH}_2\text{Cl}_2$  1:9) to give **14** as a colorless oil (180.5 mg, 0.9593 mmol, 93 % yield). The spectroscopic data derived from compound **14** match those reported in the literature.<sup>2</sup>

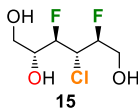

**2,3,4-Trideoxy-3-chloro-2,4-difluoro-D-allitol (15).** 2,3,4-Trideoxy-3-chloro-2,4-difluoro- $\alpha/\beta$ -D-allopyranose **11** (21.5 mg, 0.1061 mmol, 1.0 equiv.) was reduced with  $\text{NaBH}_4$  (20.0 mg, 0.5306 mmol, 5.0 equiv.) in anhydrous EtOH (1.0 mL, 0.1 M) following the general procedure II. The obtained crude was purified by flash column chromatography (silica gel, MeOH/ $\text{CH}_2\text{Cl}_2$  1:9) to give **15** as a colorless oil (20.0 mg, 0.0978 mmol, 92 % yield):  $R_f = 0.49$  (silica, MeOH/ $\text{CH}_2\text{Cl}_2$  1:9);  $[\alpha]_D^{25} = -2.63$  (c 0.8, MeOH); IR (ATR, diamond crystal)  $\nu$  3323, 2926, 2854, 1456, 1242, 1030, 885  $\text{cm}^{-1}$ ;  $^1\text{H}$  NMR (500 MHz, Acetone- $d_6$ )  $\delta$  4.97 (dddd,  $J = 46.4, 8.0, 4.4, 2.4$ , 1H, H2), 4.86 (ddd,  $J = 45.8, 8.4, 2.5$  Hz, 1H, H4), 4.76 (dddd,  $J = 22.0, 8.0, 6.9, 2.5$  Hz, 1H, H3), 4.34 (d,  $J = 6.4$  Hz, 1H, OH5), 4.24 (dd,  $J = 6.0, 6.0$  Hz, 1H, OH1), 4.01 (dddd,  $J = 8.4, 7.4, 5.3, 4.0, 3.0$  Hz, 1H, H5), 3.97 – 3.92 (m, 1H, OH6), 3.92 (dddd,  $J = 26.0, 13.0, 6.0, 2.4$  Hz, 1H, H1b), 3.90 (dddd,  $J = 29.7, 13.0, 6.0, 4.7$  Hz, 1H, H1a), 3.76 (dddd,  $J = 11.5, 5.3, 3.1, 3.1$  Hz, 1H, H6a), 3.67

(dddd,  $J = 11.2, 7.0, 4.3, 2.6$  Hz, 1H, H6b) ppm;  $^{13}\text{C}$   $\{^1\text{H}\}$  NMR (126 MHz, Acetone- $d_6$ )  $\delta$  93.4 (dd,  $J = 175.6, 5.6$  Hz, 1C, C2), 93.0 (dd,  $J = 178.7, 3.4$  Hz, 1C, C4), 71.2 (dd,  $J = 25.5, 3.2$  Hz, 1C, C5), 63.3 (d,  $J = 3.1$  Hz, 1C, C6), 62.1 (dd,  $J = 20.9, 2.2$  Hz, 1C, C1), 58.4 (dd,  $J = 25.1, 21.6$  Hz, 1C, C3) ppm;  $^{19}\text{F}$  NMR (470 MHz, Acetone- $d_6$ )  $\delta$  -187.73 (dddd,  $J = 46.3, 29.8, 26.5, 6.9$  Hz, 1F, F2), -198.57 (dddd,  $J = 45.1, 21.8, 6.5, 2.5, 2.0$  Hz, 1F, F4) ppm; HRMS calcd for  $\text{C}_6\text{H}_{10}\text{ClF}_2\text{O}_3^-$   $[\text{M} - \text{H}]^-$  203.0292 found 203.0295.

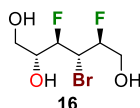

**2,3,4-Trideoxy-3-bromo-2,4-difluoro-D-allitol (16).** 2,3,4-Trideoxy-3-bromo-2,4-difluoro- $\alpha/\beta$ -D-allopyranose **12** (217.3 mg, 0.8796 mmol, 1.0 equiv.) was reduced with  $\text{NaBH}_4$  (58.2 mg, 1.539 mmol, 1.75 equiv.) in anhydrous EtOH (8.8 mL, 0.1 M) following the general procedure II. The obtained crude was purified by flash column chromatography (silica gel, MeOH/ $\text{CH}_2\text{Cl}_2$  1:9) to give **16** as a colorless oil (214.3 mg, 0.8605 mmol, 98 % yield):  $R_f = 0.49$  (silica, MeOH/ $\text{CH}_2\text{Cl}_2$  1:9);  $[\alpha]_{\text{D}}^{25} = -1.69$  (c 0.9, MeOH); IR (ATR, diamond crystal)  $\nu$  3371, 2924, 2854, 1373, 1273, 1072  $\text{cm}^{-1}$ ;  $^1\text{H}$  NMR (500 MHz, Acetone- $d_6$ )  $\delta$  5.00 (dddd,  $J = 46.5, 8.0, 4.5, 2.3$  Hz, 1H, H2), 4.86 (ddd,  $J = 45.7, 8.3, 2.5$  Hz, 1H, H4), 4.82 (dddd,  $J = 23.0, 8.0, 7.3, 2.5$  Hz, 1H, H3), 4.35 (d,  $J = 3.8$  Hz, 1H, OH5), 4.24 (dd,  $J = 6.1, 6.1$  Hz, 1H, OH1), 4.06 – 3.87 (m, 4H, H1a, H1b, H5, OH6), 3.76 (dd,  $J = 11.5, 3.0$  Hz, 1H, H6b), 3.67 (dd,  $J = 11.2, 1.5$  Hz, 1H, H6a) ppm;  $^{13}\text{C}$   $\{^1\text{H}\}$  NMR (126 MHz, Acetone- $d_6$ )  $\delta$  93.4 (dd,  $J = 176.7, 4.7$  Hz, 1C, C2), 93.2 (dd,  $J = 178.6, 4.0$  Hz, 1C, C4), 72.2 (dd,  $J = 25.6, 3.0$  Hz, 1C, C5), 63.3 (d,  $J = 2.8$  Hz, 1C, C6), 63.1 (dd,  $J = 20.9, 2.1$  Hz, 1C, C1), 50.5 (dd,  $J = 23.3, 21.4$  Hz, 1C, C3) ppm;  $^{19}\text{F}$  NMR (470 MHz, Acetone- $d_6$ )  $\delta$  -183.16 (dddd,  $J = 46.7, 28.4, 28.3, 7.1$  Hz, 1F, F2), -196.03 (ddd,  $J = 45.2, 22.1, 3.5$  Hz, 1F, F4) ppm; HRMS calcd for  $\text{C}_6\text{H}_{10}\text{BrF}_2\text{O}_3^-$   $[\text{M} - \text{H}]^-$  246.9787 found 246.9792.

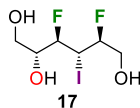

**2,3,4-Trideoxy-3-iodo-2,4-difluoro-D-allitol (17).** 2,3,4-Trideoxy-2,4-difluoro-3-iodo- $\alpha/\beta$ -D-allopyranose **13** (10.8 mg, 0.03673 mmol, 1.0 equiv.) was reduced with NaBH<sub>4</sub> (2.4 mg, 0.06344 mmol, 1.73 equiv.) in anhydrous EtOH (0.37 mL, 0.1 M) following the general procedure II. The obtained crude was purified by flash column chromatography (silica gel, MeOH/CH<sub>2</sub>Cl<sub>2</sub> 1:9) to give **17** as a colorless oil (9.8 mg, 0.03310 mmol, 90 % yield):  $R_f = 0.50$  (silica, MeOH/CH<sub>2</sub>Cl<sub>2</sub> 1:9);  $[\alpha]_D^{25} = 3.86$  (c 0.7, MeOH); IR (ATR, diamond crystal)  $\nu$  3337, 2930, 2881, 1452, 1234, 1022, 878 cm<sup>-1</sup>; <sup>1</sup>H NMR (500 MHz, Acetone-*d*<sub>6</sub>)  $\delta$  4.89 (dddd,  $J = 24.3, 8.2, 8.2, 2.8$  Hz, 1H, H3), 4.83 (dddd,  $J = 46.4, 8.1, 4.9, 2.1$  Hz, 1H, H2), 4.65 (ddd,  $J = 45.1, 8.2, 2.4$  Hz, 1H, H4), 4.32 (d,  $J = 6.5$  Hz, 1H, OH5), 4.21 (dd,  $J = 6.0, 6.0$  Hz, 1H, OH1), 4.04 (dddd,  $J = 28.0, 13.0, 5.7, 2.1$  Hz, 1H, H1b), 3.98 (dddd,  $J = 8.2, 6.6, 6.4, 4.6, 3.1$  Hz, 1H, H5), 3.97 (dddd,  $J = 28.2, 13.0, 6.0, 4.9$  Hz, 1H, H1a), 3.94 (dd,  $J = 6.0, 5.8$  Hz, 1H, OH6), 3.75 (dddd,  $J = 11.5, 5.8, 3.1, 3.1$  Hz, 1H, H6b), 3.67 (dddd,  $J = 11.2, 6.0, 4.6, 4.6$  Hz, 1H, H6a). <sup>13</sup>C {<sup>1</sup>H} NMR (126 MHz, Acetone-*d*<sub>6</sub>)  $\delta$  94.0 (dd,  $J = 177.9, 5.2$  Hz, 1C, C4), 93.8 (dd,  $J = 177.0, 4.3$  Hz, 1C, C2), 73.7 (dd,  $J = 25.8, 2.5$  Hz, 1C, C5), 64.9 (dd,  $J = 20.9, 2.3$  Hz, 1C, C1), 63.3 (d,  $J = 2.9$  Hz, 1C, C6), 29.9 (dd,  $J = 20.7, 20.7$  Hz, 1C, C3) ppm; <sup>19</sup>F NMR (470 MHz, Acetone-*d*<sub>6</sub>)  $\delta$  -177.62 (dddd,  $J = 47.3, 28.2, 28.0, 8.1$  Hz, 1F, F2), -190.63 (ddd,  $J = 45.3, 23.6, 6.6$  Hz, 1F, F4) ppm; HRMS calcd for C<sub>6</sub>H<sub>15</sub>F<sub>2</sub>IO<sub>3</sub><sup>+</sup> [M + NH<sub>4</sub>]<sup>+</sup> 314.0059 found 314.0052.

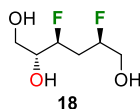

**2,3,4-Trideoxy-2,4-difluoro-D-allitol (18).** To a stirred solution of 2,3,4-trideoxy-2,4-difluoro-3-iodo- $\alpha/\beta$ -D-allopyranose **13** (12.5 mg, 0.04251 mmol, 1.0 equiv.) in anhydrous EtOH (0.43 mL, 0.1 M) was added NaBH<sub>4</sub> (12.9 mg, 0.3401 mmol, 8.0 equiv.). The mixture was stirred at 50 °C for 1 h. After the mixture was cooled down to room temperature, 1 mL of MeOH was added, and the mixture was neutralized to pH  $\approx$  7 with acidic resin. The mixture was filtered and concentrated under reduced pressure. The obtained crude was purified by flash column chromatography (silica gel, MeOH/CH<sub>2</sub>Cl<sub>2</sub> 1:9) to give **18** as a

colorless oil (4.8 mg, 0.02821 mmol, 66 % yield):  $R_f = 0.52$  (silica, MeOH/CH<sub>2</sub>Cl<sub>2</sub> 3:17);  $[\alpha]_D^{25} = -6.91$  (c 0.5, MeOH); IR (ATR, diamond crystal)  $\nu$  3350, 2926, 2856, 1441, 1230, 1051, 860 cm<sup>-1</sup>; <sup>1</sup>H NMR (500 MHz, Acetone-*d*<sub>6</sub>)  $\delta$  4.75 (dddd,  $J = 48.8, 6.0, 6.0, 6.0, 3.4$  Hz, 1H, H2), 4.65 (dddd,  $J = 48.1, 9.0, 6.0, 3.4$  Hz, 1H, H4), 4.14 (d,  $J = 5.5$  Hz, 1H, OH5), 4.05 (dd,  $J = 6.0, 6.0$  Hz, 1H, OH1), 3.79 (dd,  $J = 5.9, 5.1$  Hz, 1H, OH6), 3.76 – 3.63 (m, 4H, H1a, H1b, H5, H6b), 3.59 (ddd,  $J = 11.2, 5.2, 5.1$  Hz, 1H, H6a), 2.21 (dddd,  $J = 34.2, 21.9, 15.2, 6.1, 3.5$  Hz, 1H, H3b), 2.07 (dddd,  $J = 18.6, 18.5, 15.0, 8.5, 6.3$  Hz, 1H, H3a) ppm; <sup>13</sup>C {<sup>1</sup>H} NMR (126 MHz, Acetone-*d*<sub>6</sub>)  $\delta$  93.1 (dd,  $J = 169.3, 2.9$  Hz, 1C, C2), 91.6 (dd,  $J = 169.6, 5.9$  Hz, 1C, C4), 73.8 (d,  $J = 23.6$  Hz, 1C, C5), 64.5 (dd,  $J = 22.8, 1.1$  Hz, 1C, C1), 63.3 (d,  $J = 5.9$  Hz, 1C, C6), 33.5 (dd,  $J = 21.1, 21.1$  Hz, 1C, C3) ppm; <sup>19</sup>F NMR (470 MHz, Acetone-*d*<sub>6</sub>)  $\delta$  -188.01 (dddd,  $J = 48.8, 25.0, 24.0, 21.9, 18.4, 3.5$  Hz, 1F, F2), -189.96 (dddd,  $J = 48.1, 34.2, 19.0, 11.2, 1.8$  Hz, 1F, F4) ppm; the compound does not ionize.

### Selective protection of primary hydroxyl groups of **16**

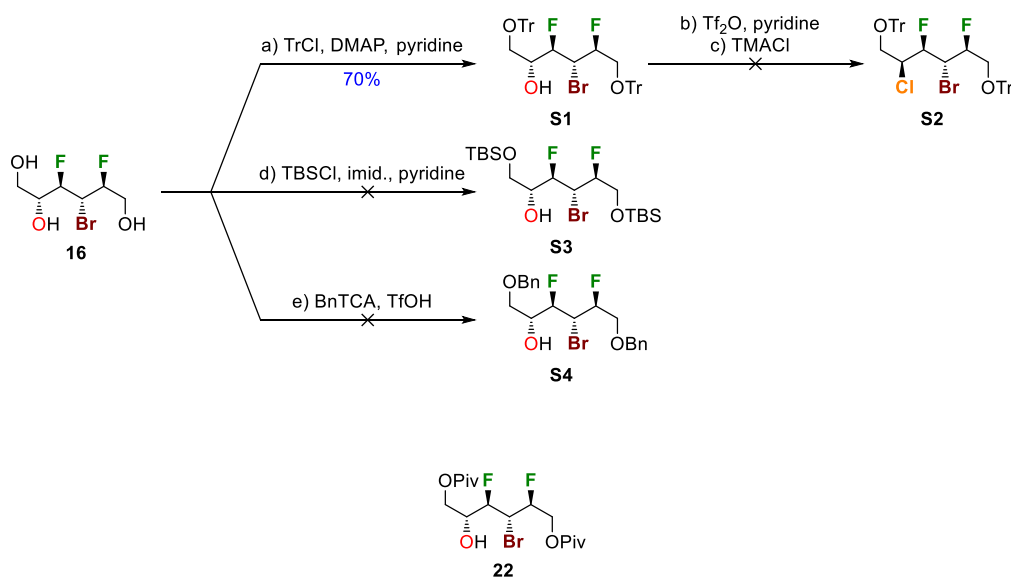

**1,6-Bis-O-pivaloyl-2,3,4-trideoxy-3-bromo-2,4-difluoro-D-allitol (22)** 2,3,4-Trideoxy-3-bromo-2,4-difluoro-D-allitol **16** (32.9 mg, 0.1321 mmol, 1.0 equiv.) was diluted in pyridine (1.3 mL, 0.1 M), and PivCl (32.4  $\mu$ L, 0.2642 mmol, 2.0 equiv.) was added. The reaction mixture was heated at 60 °C for 18 h. The mixture was then cooled down to room temperature, quenched with a saturated solution of NaHCO<sub>3</sub>, and extracted with CH<sub>2</sub>Cl<sub>2</sub>.

The combined organic phase was washed with 1 M HCl, dried over MgSO<sub>4</sub>, filtered, and concentrated under reduced pressure. The obtained crude was purified by flash column chromatography (silica gel, EtOAc/hexanes 1:9) to give **22** as a white amorphous solid (30.4 mg, 0.07285 mmol, 55 % yield):  $R_f = 0.47$  (silica, EtOAc/hexanes 1:3);  $[\alpha]_D^{25} = -1.70$  (c 0.9, MeOH); IR (ATR, diamond crystal)  $\nu$  3485, 2974, 2876, 1732, 1396, 1283, 1149 cm<sup>-1</sup>; <sup>1</sup>H NMR (500 MHz, CDCl<sub>3</sub>)  $\delta$  5.17 (dddd,  $J = 46.1, 8.9, 4.6, 2.1$  Hz, 1H, H2), 4.77 (ddd,  $J = 45.2, 8.4, 2.6$  Hz, 1H, H4), 4.60 (dddd,  $J = 20.6, 9.1, 6.5, 2.6$  Hz, 1H, H3), 4.54 (dddd,  $J = 24.3, 13.0, 1.9, 0.9$  Hz, 1H, H1b), 4.45 (ddd,  $J = 29.7, 13.0, 4.6$  Hz, 1H, H1a), 4.44 (ddd,  $J = 12.1, 2.1, 2.1$  Hz, 1H, H6b), 4.27 (dddd,  $J = 8.4, 5.5, 4.8, 2.1$  Hz, 1H, H5), 4.25 (ddd,  $J = 12.1, 4.8, 2.1$  Hz, 1H, H6a), 2.85 (sbr, 1H, OH5), 1.24 – 1.23 (m, 18H, 2×COC(CH<sub>3</sub>)<sub>3</sub>) ppm; <sup>13</sup>C {<sup>1</sup>H} NMR (126 MHz, CDCl<sub>3</sub>)  $\delta$  179.8 (s, 1C, COC(CH<sub>3</sub>)<sub>3</sub>), 178.1 (s, 1C, COC(CH<sub>3</sub>)<sub>3</sub>), 90.8 (dd,  $J = 180.9, 3.0$  Hz, 1C, C4), 89.5 (dd,  $J = 179.9, 6.0$  Hz, 1C, C2), 70.4 (dd,  $J = 26.6, 3.4$  Hz, 1C, C5), 65.5 (d,  $J = 2.6$  Hz, 1C, C6), 64.0 (dd,  $J = 20.9, 1.8$  Hz, 1C, C1), 47.7 (dd,  $J = 23.1, 21.7$  Hz, 1C, C3), 39.2 (s, 1C, COC(CH<sub>3</sub>)<sub>3</sub>), 39.1 (s, 1C, COC(CH<sub>3</sub>)<sub>3</sub>), 27.3 (s, 3C, COC(CH<sub>3</sub>)<sub>3</sub>), 27.2 (s, 3C, COC(CH<sub>3</sub>)<sub>3</sub>) ppm; <sup>19</sup>F NMR (470 MHz, CDCl<sub>3</sub>)  $\delta$  -181.72 (dddd,  $J = 46.1, 30.2, 24.1, 6.5$  Hz, 1F, F2), -194.70 (ddd,  $J = 44.1, 20.6, 5.5$  Hz, 1F, F4) ppm; HRMS calcd for C<sub>16</sub>H<sub>28</sub>BrF<sub>2</sub>O<sub>5</sub><sup>+</sup> [M + H]<sup>+</sup> 417.1083 found 417.1097.

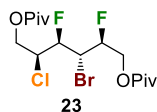

**1,6-Bis-O-pivaloyl-2,3,4,5-tetra-deoxy-3-bromo-5-chloro-2,4-difluoro-L-talitol (23).**

To a stirred solution of 1,6-bis-O-pivaloyl-2,3,4-trideoxy-3-bromo-2,4-difluoro-D-allitol **22** (59.3 mg, 0.1421 mmol, 1.0 equiv.) in pyridine (1.4 mL, 0.1 M) at 0 °C was added PPh<sub>3</sub> (372.7 mg, 1.421 mmol, 10.0 equiv.) and CCl<sub>4</sub> (0.14 mL, 1.421 mmol, 10.0 equiv.). The reaction mixture was stirred at room temperature for 18 h. The mixture was diluted with CH<sub>2</sub>Cl<sub>2</sub> and the organic phase was washed with 1 M HCl, saturated NaHCO<sub>3</sub>, and brine before being dried over MgSO<sub>4</sub>, filtered, and concentrated under reduced pressure. The obtained crude was purified by flash column chromatography (silica gel, EtOAc/hexanes 1:4) to give **23** as a white amorphous solid (61.1 mg, 0.1402 mmol, 99 % yield):  $R_f = 0.54$

(silica, EtOAc/hexanes 1:4);  $[\alpha]_{\text{D}}^{25} = 2.61$  (c 1.0,  $\text{CHCl}_3$ ); IR (ATR, diamond crystal)  $\nu$  1972, 2874, 1718, 1283, 1157, 638  $\text{cm}^{-1}$ ;  $^1\text{H}$  NMR (500 MHz,  $\text{CDCl}_3$ )  $\delta$  5.06 (dddd,  $J = 46.3, 6.7, 3.7, 3.0$  Hz, 1H, H2), 4.96 (ddd,  $J = 46.3, 9.7, 1.7$  Hz, 1H, H4), 4.62 (dddd,  $J = 27.0, 7.8, 6.3, 1.7$  Hz, 1H, H5), 4.54 (dddd,  $J = 17.2, 9.7, 5.3, 3.0$  Hz, 1H, H3), 4.46 (ddd,  $J = 11.4, 6.4, 1.3$  Hz, 1H, H6b), 4.44 (dddd,  $J = 17.4, 12.6, 6.7, 1.9$  Hz, 1H, H1b), 4.36 (dddd,  $J = 26.1, 12.6, 3.7, 0.5$  Hz, 1H, H1a), 4.27 (dd,  $J = 11.5, 7.7$  Hz, 1H, H5), 1.23 (s, 9H,  $\text{COC}(\text{CH}_3)_3$ ), 1.22 (s, 9H,  $\text{COC}(\text{CH}_3)_3$ ) ppm;  $^{13}\text{C}$   $\{^1\text{H}\}$  NMR (126 MHz,  $\text{CDCl}_3$ )  $\delta$  178.1 (s, 1C,  $\text{COC}(\text{CH}_3)_3$ ), 177.7 (s, 1C,  $\text{COC}(\text{CH}_3)_3$ ), 90.7 (dd,  $J = 182.1, 2.4$  Hz, 1C, C2), 89.0 (dd,  $J = 188.2, 5.5$  Hz, 1C, C4), 64.0 (dd,  $J = 25.5, 6.0$  Hz, 1C, C1), 63.5 (d,  $J = 5.2$  Hz, 1C, C6), 57.1 (d,  $J = 19.6$  Hz, 1C, C5), 47.2 (dd,  $J = 22.6, 22.6$  Hz, 1C, C3), 38.99 (s, 1C,  $\text{COC}(\text{CH}_3)_3$ ), 38.95 (s, 1C,  $\text{COC}(\text{CH}_3)_3$ ), 27.22 (s, 3C,  $\text{COC}(\text{CH}_3)_3$ ), 27.21 (s, 3C,  $\text{COC}(\text{CH}_3)_3$ ) ppm;  $^{19}\text{F}$  NMR (470 MHz,  $\text{CDCl}_3$ )  $\delta$  -189.87 (dddddd,  $J = 46.5, = 27.0, 5.3, 3.5, 1.3$  Hz, 1F, F4), -192.02 (dddddd,  $J = 46.3, 27.0, 17.4, 17.4, 3.5, 2.1$  Hz, 1F, F2) ppm; HRMS calcd for  $\text{C}_{16}\text{H}_{30}\text{BrClF}_2\text{NO}_4^+ [\text{M} + \text{NH}_4]^+$  452.1009 found 452.1026.

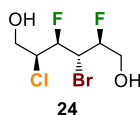

**2,3,4,5-Tetradeoxy-3-bromo-5-chloro-2,4-difluoro-L-talitol (24).** To a stirred solution of 1,6-bis-*O*-pivaloyl-2,3,4,5-tetradeoxy-3-bromo-5-chloro-2,4-difluoro-L-talitol **23** (57.0 mg, 0.1308 mmol, 1.0 equiv.) in anhydrous  $\text{CH}_2\text{Cl}_2$  (1.3 mL, 0.1 M) at  $-78$  °C under an argon atmosphere was added DIBAL (0.57 M in THF, 1.8 mL, 1.046 mmol, 8.0 equiv.). The reaction mixture was stirred between  $-60$  and  $-40$  °C for 8 h. The mixture was quenched with EtOAc, warmed to room temperature, and the organic phase was washed with 1 M HCl, saturated  $\text{NaHCO}_3$ , and brine before being dried over  $\text{MgSO}_4$ , filtered, and concentrated under reduced pressure. The obtained crude was purified by flash column chromatography (silica gel, EtOAc/hexanes 1:9  $\rightarrow$  3:2). The resulting product was recrystallized from acetone to give **24** as a colorless crystal (22.8 mg, 0.08524 mmol, 65 % yield):  $R_f = 0.31$  (silica, EtOAc/hexanes 1:1);  $[\alpha]_{\text{D}}^{25} = 26.4$  (c 0.6, MeOH); IR (ATR, diamond crystal)  $\nu$  3350, 2951, 2885, 1462, 1248, 1047, 849  $\text{cm}^{-1}$ ;  $^1\text{H}$  NMR (500 MHz, Acetone- $d_6$ )  $\delta$  5.30 (ddd,  $J = 45.7, 9.3, 2.1$  Hz, 1H, H4), 4.96 (dddd,  $J = 46.4, 5.9, 4.4, 3.5$  Hz,

1H, H2), 4.67 (dddd,  $J = 15.8, 9.4, 7.8, 3.4$  Hz, 1H, H3), 4.63 (dd,  $J = 6.1, 6.1$  Hz, 1H, OH6), 4.53 (dddd,  $J = 26.9, 8.0, 6.0, 2.1$  Hz, 1H, H5), 4.37 (dd,  $J = 6.1, 6.1$  Hz, 1H, OH6), 4.00 – 3.80 (m, 4H, H1a, H1b, H6a, H6b) ppm;  $^{13}\text{C}$  { $^1\text{H}$ } NMR (126 MHz, Acetone- $d_6$ )  $\delta$  94.5 (dd,  $J = 178.7, 2.0$  Hz, 1C, C2), 90.0 (dd,  $J = 184.4, 5.7$  Hz, 1C, C4), 63.1 (d,  $J = 5.2$  Hz, 1C, C6), 62.9 (dd,  $J = 24.2, 4.2$  Hz, 1C, C1), 62.1 (dd,  $J = 19.4, 1.2$  Hz, 1C, C5), 49.3 (dd,  $J = 23.5, 22.3$  Hz, 1C, C3) ppm;  $^{19}\text{F}$  NMR (470 MHz, Acetone- $d_6$ )  $\delta$  -191.75 (dddddd,  $J = 46.5, 23.7, 18.9, 15.8, 4.7, 4.3$  Hz, 1F, F2), -193.11 (dddd,  $J = 45.6, 26.9, 7.8, 4.3$  Hz, 1F, F4) ppm; HRMS calcd for  $\text{C}_6\text{H}_9\text{BrClF}_2\text{O}_2^-$  [M - H] $^-$  264.9448 found 264.9458.

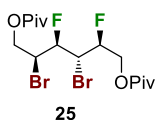

**1,6-Bis-*O*-pivaloyl-2,3,4,5-tetradeoxy-3,5-dibromo-2,4-difluoro-*L*-talitol (25).** To a stirred solution of 1,6-bis-*O*-pivaloyl-2,3,4-trideoxy-3-bromo-2,4-difluoro-*D*-allitol **22** (24.5 mg, 0.05871 mmol, 1.0 equiv.) in pyridine (0.6 mL, 0.1 M) at 0 °C was added  $\text{PPh}_3$  (153.9 mg, 0.5871 mmol, 10.0 equiv.) and  $\text{CBr}_4$  (195 mg, 0.5871 mmol, 10.0 equiv.). The reaction mixture was stirred at room temperature for 4 days. The mixture was diluted with  $\text{CH}_2\text{Cl}_2$  and the organic phase was washed with 1 M HCl, saturated  $\text{NaHCO}_3$ , and brine before being dried over  $\text{MgSO}_4$ , filtered, and concentrated under reduced pressure. The obtained crude was purified by flash column chromatography (silica gel, EtOAc/hexanes 1:4) to give **25** as a white amorphous solid (23.3 mg, 0.04852 mmol, 83 % yield):  $R_f = 0.66$  (silica, EtOAc/hexanes 1:9);  $[\alpha]_D^{25} = 7.05$  (c 0.5,  $\text{CHCl}_3$ ); IR (ATR, diamond crystal)  $\nu$  2974, 1732, 1481, 1281, 1215, 1148  $\text{cm}^{-1}$ ;  $^1\text{H}$  NMR (500 MHz,  $\text{CDCl}_3$ )  $\delta$  5.05 (dddd,  $J = 46.3, 6.7, 3.7, 2.9$  Hz, 1H, H2), 4.81 (ddd,  $J = 46.6, 9.7, 1.6$  Hz, 1H, H4), 4.65 (dddd,  $J = 28.3, 8.0, 6.1, 1.6$  Hz, 1H, H5), 4.54 (ddd,  $J = 11.3, 5.9, 1.1$  Hz, 1H, H6b), 4.52 (dddd,  $J = 17.4, 9.7, 5.1, 3.0$  Hz, 1H, H3), 4.44 (dddd,  $J = 17.4, 12.6, 6.8, 2.0$  Hz, 1H, H1b), 4.36 (ddd,  $J = 26.3, 12.6, 3.7$  Hz, 1H, H1a), 4.30 (dd,  $J = 11.5, 8.3$  Hz, 1H, H6a), 1.23 (s, 9H,  $\text{COC}(\text{CH}_3)_3$ ), 1.22 (s, 9H,  $\text{COC}(\text{CH}_3)_3$ ) ppm;  $^{13}\text{C}$  { $^1\text{H}$ } NMR (126 MHz,  $\text{CDCl}_3$ )  $\delta$  178.1 (s, 1C,  $\text{COC}(\text{CH}_3)_3$ ), 177.6 (s, 1C,  $\text{COC}(\text{CH}_3)_3$ ), 90.7 (dd,  $J = 182.1, 2.5$  Hz, 1C, C2), 88.5 (dd,  $J = 187.6, 5.5$  Hz, 1C, C4), 64.0 (dd,  $J = 25.6, 6.0$  Hz, 1C, C1), 63.8 (d,  $J = 4.1$  Hz, 1C, C6), 49.1 (d,  $J = 19.7$  Hz, 1C C5), 48.8 (dd,  $J = 22.4, 22.4$  Hz, 1C, C3), 39.00 (s, 1C,



COC(CH<sub>3</sub>)<sub>3</sub>, 38.95 (s, 1C, COC(CH<sub>3</sub>)<sub>3</sub>), 27.23 (s, 3C, COC(CH<sub>3</sub>)<sub>3</sub>), 27.22 (s, 3C, COC(CH<sub>3</sub>)<sub>3</sub>) ppm; <sup>19</sup>F NMR (470 MHz, CDCl<sub>3</sub>) δ -185.64 (dddd, *J* = 46.7, 28.3, 5.1, 3.5 Hz, 1F, F4), -191.86 (dddd, *J* = 46.3, 26.0, 17.4, 17.4, 3.5 Hz, 1F, F2) ppm; HRMS calcd for C<sub>16</sub>H<sub>30</sub>Br<sub>2</sub>F<sub>2</sub>NO<sub>4</sub><sup>+</sup> [M + NH<sub>4</sub>]<sup>+</sup> 496.0504 found 496.0519.

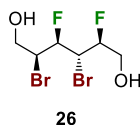

**2,3,4,5-Tetraoxy-3,5-dibromo-2,4-difluoro-L-talitol (26).** To a stirred solution of 1,6-bis-*O*-pivaloyl-2,3,4,5-tetraoxy-3,5-dibromo-2,4-difluoro-L-talitol **25** (23.3 mg, 0.04852 mmol, 1.0 equiv.) in anhydrous CH<sub>2</sub>Cl<sub>2</sub> (0.5 mL, 0.1 M) at -78 °C under an argon atmosphere was added DIBAL (0.57 M in THF, 0.68 mL, 0.3882 mmol, 8.0 equiv.). The reaction mixture was stirred between -60 and -40 °C for 6 h. The mixture was quenched with EtOAc, warmed to room temperature, and the organic phase was washed with 1 M HCl, saturated NaHCO<sub>3</sub>, and brine before being dried over MgSO<sub>4</sub>, filtered, and concentrated under reduced pressure. The obtained crude was purified by flash column chromatography (silica gel, EtOAc/hexanes 1:9 → 3:2) to give **26** as a white amorphous solid (9.5 mg, 0.03045 mmol, 63 % yield): *R*<sub>f</sub> = 0.47 (silica, EtOAc/hexanes 3:2); [α]<sub>D</sub><sup>25</sup> = 28.4 (c 0.5, MeOH); IR (ATR, diamond crystal) ν 3352, 2941, 2853, 1456, 1379, 1067, 856 cm<sup>-1</sup>; <sup>1</sup>H NMR (500 MHz, Acetone-*d*<sub>6</sub>) δ 5.18 (ddd, *J* = 45.9, 9.4, 2.0 Hz, 1H, H4), 4.96 (dddd, *J* = 46.4, 6.2, 4.3, 3.3 Hz, 1H, H2), 4.69 (ddd, *J* = 6.7, 5.6, 0.8 Hz, 1H, OH6), 4.64 (dddd, *J* = 16.0, 9.4, 7.5, 3.4 Hz, 1H, H3), 4.61 (dddd, *J* = 28.3, 8.7, 5.8, 2.0 Hz, 1H, H5), 4.37 (ddd, *J* = 6.0, 5.9, 1.2 Hz, 1H, OH1), 3.99 – 3.84 (m, 4H, H1a, H1b, H6a, H6b) ppm; <sup>13</sup>C {<sup>1</sup>H} NMR (126 MHz, Acetone-*d*<sub>6</sub>) δ 94.4 (dd, *J* = 178.8, 2.3 Hz, 1C, C2), 89.4 (dd, *J* = 183.9, 5.7 Hz, 1C, C4), 63.6 (d, *J* = 4.3 Hz, 1C, C6), 63.0 (dd, *J* = 24.3, 4.3 Hz, 1C, C1), 55.4 (dd, *J* = 19.6, 1.1 Hz, 1C, C5), 50.9 (dd, *J* = 22.7, 22.7 Hz, 1C, C3) ppm; <sup>19</sup>F NMR (470 MHz, Acetone-*d*<sub>6</sub>) δ -188.91 (dddd, *J* = 45.9, 28.3, 7.5, 4.8 Hz, 1F, F4), -191.63 (dddd, *J* = 46.4, 24.0, 19.5, 16.0, 4.9 Hz, 1F, F2) ppm; HRMS calcd for C<sub>6</sub>H<sub>9</sub>Br<sub>2</sub>F<sub>2</sub>O<sub>2</sub><sup>-</sup> [M - H]<sup>-</sup> 308.8943 found 308.8942.

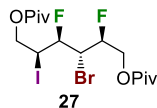

**1,6-Bis-*O*-pivaloyl-2,3,4,5-tetradeoxy-3-bromo-2,4-difluoro-5-iodo-L-talitol (27).** To a stirred solution of 1,6-bis-*O*-pivaloyl-2,3,4-trideoxy-3-bromo-2,4-difluoro-D-allitol **22** (24.2 mg, 0.05799 mmol, 1.0 equiv.) in pyridine (0.6 mL, 0.1 M) at 0 °C was added PPh<sub>3</sub> (136.7 mg, 0.5799 mmol, 10.0 equiv.) and I<sub>2</sub> (152.0 mg, 0.5799 mmol, 10.0 equiv.). The reaction mixture was stirred at room temperature for 5 days. The mixture was diluted with CH<sub>2</sub>Cl<sub>2</sub> and the organic phase was washed with 1 M HCl, saturated NaHCO<sub>3</sub>, and brine before being dried over MgSO<sub>4</sub>, filtered, and concentrated under reduced pressure. The obtained crude was purified by flash column chromatography (silica gel, EtOAc/hexanes 1:19) and repurified by flash column chromatography (silica gel, Et<sub>2</sub>O/pentane 1:25 → 1:9) to give **27** as a white amorphous solid (16.8 mg, 0.03187 mmol, 55 % yield): *R<sub>f</sub>* = 0.56 (silica, EtOAc/hexanes 1:9); [α]<sub>D</sub><sup>25</sup> = 5.19 (c 0.1, CHCl<sub>3</sub>); IR (ATR, diamond crystal)  $\nu$  2972, 2934, 1732, 1479, 1279, 1134 cm<sup>-1</sup>; <sup>1</sup>H NMR (500 MHz, CDCl<sub>3</sub>)  $\delta$  5.04 (dddd, *J* = 46.3, 6.7, 3.3, 3.3 Hz, 1H, H2), 4.75 (dddd, *J* = 30.9, 9.3, 5.8, 1.6 Hz, 1H, H5), 4.59 (ddd, *J* = 11.5, 5.8, 1.0 Hz, 1H, H6b), 4.44 (dddd, *J* = 17.5, 12.5, 6.8, 2.0 Hz, 1H, H1b), 4.40 (dddd, *J* = 17.2, 9.8, 4.6, 3.4 Hz, 1H, H3), 4.36 (ddd, *J* = 25.9, 12.5, 3.7 Hz, 1H, H1a), 4.27 (dd, *J* = 11.5, 9.2 Hz, 1H, H6a), 4.22 (ddd, *J* = 47.4, 9.7, 1.6 Hz, 1H, H4), 1.23 (s, 9H, COC(CH<sub>3</sub>)<sub>3</sub>), 1.23 (s, 9H, COC(CH<sub>3</sub>)<sub>3</sub>) ppm; <sup>13</sup>C {<sup>1</sup>H} NMR (126 MHz, CDCl<sub>3</sub>)  $\delta$  178.1 (s, 1C, COC(CH<sub>3</sub>)<sub>3</sub>), 177.5 (s, 1C, COC(CH<sub>3</sub>)<sub>3</sub>), 90.6 (dd, *J* = 182.2, 2.4 Hz, 1C, C2), 88.5 (dd, *J* = 186.4, 5.6 Hz, 1C, C4), 65.6 (d, *J* = 2.6 Hz, 1C, C6), 64.1 (dd, *J* = 25.5, 6.0 Hz, 1C, C1), 51.8 (dd, *J* = 21.6, 21.6 Hz, 1C, C3), 39.01 (s, 1C, COC(CH<sub>3</sub>)<sub>3</sub>), 38.96 (s, 1C, COC(CH<sub>3</sub>)<sub>3</sub>), 29.3 (d, *J* = 20.1 Hz, 1C, C5), 27.26 (s, 3C, COC(CH<sub>3</sub>)<sub>3</sub>), 27.24 (s, 3C, COC(CH<sub>3</sub>)<sub>3</sub>) ppm; <sup>19</sup>F NMR (470 MHz, CDCl<sub>3</sub>)  $\delta$  -177.77 (dddd, *J* = 47.6, 30.9, 4.6, 2.9 Hz, 1F, F4), -191.38 (dddd, *J* = 46.4, 25.9, 17.2, 17.2, 2.9 Hz, 1F, F2) ppm. HRMS calcd for C<sub>16</sub>H<sub>30</sub>BrF<sub>2</sub>INO<sub>4</sub><sup>+</sup> [M + NH<sub>4</sub>]<sup>+</sup> 544.0365 found 544.0369.

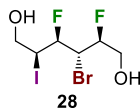

**2,3,4,5-Tetrahydroxy-3-bromo-2,4-difluoro-5-iodo-L-talitol (28).** To a stirred solution of 1,6-bis-*O*-pivaloyl-2,3,4,5-tetrahydroxy-3-bromo-2,4-difluoro-5-iodo-L-talitol **27** (15.8 mg, 0.02997 mmol, 1.0 equiv.) in anhydrous CH<sub>2</sub>Cl<sub>2</sub> (0.3 mL, 0.1 M) at -78 °C under an argon atmosphere was added DIBAL (0.57 M in THF, 0.42 mL, 0.2398 mmol, 8.0 equiv.). The reaction mixture was stirred between -60 and -40 °C for 6 h. The mixture was quenched with EtOAc, warmed to room temperature, and the organic phase was washed with 1 M HCl, saturated NaHCO<sub>3</sub>, and brine before being dried over MgSO<sub>4</sub>, filtered, and concentrated under reduced pressure. The obtained crude was purified by flash column chromatography (silica gel, EtOAc/hexanes 1:9 → 3:2) to give **28** as a white amorphous solid (7.1 mg, 0.01978 mmol, 66 % yield): *R*<sub>f</sub> = 0.56 (silica, EtOAc/hexanes 3:2); [α]<sub>D</sub><sup>25</sup> = 19.1 (c 0.3, MeOH); IR (ATR, diamond crystal)  $\nu$  3360, 2920, 2851, 1462, 1379, 1063, 856 cm<sup>-1</sup>; <sup>1</sup>H NMR (500 MHz, Acetone-*d*<sub>6</sub>)  $\delta$  4.95 (dddd, *J* = 46.5, 6.3, 4.4, 3.1 Hz, 1H, H2), 4.75 (ddd, *J* = 6.8, 5.4, 1.0 Hz, 1H, OH6), 4.70 (dddd, *J* = 31.0, 9.7, 5.5, 2.0 Hz, 1H, H5), 4.64 (ddd, *J* = 46.0, 9.5, 1.9 Hz, 1H, H4), 4.54 (dddd, *J* = 15.8, 9.5, 7.5, 3.2 Hz, 1H, H3), 4.36 (ddd, *J* = 5.7, 5.7, 1.1 Hz, 1H, OH1), 3.98 (ddd, *J* = 11.3, 5.4, 5.2 Hz, 1H, H6b), 4.00 – 3.86 (m, 2H, H1a, H1b), 3.86 (ddd, *J* = 11.4, 9.6, 7.0 Hz, 1H, H6a) ppm; <sup>13</sup>C {<sup>1</sup>H} NMR (126 MHz, Acetone-*d*<sub>6</sub>)  $\delta$  94.4 (dd, *J* = 178.9, 2.0 Hz, 1C, C2), 89.1 (dd, *J* = 182.5, 5.9 Hz, 1C, C4), 65.5 (d, *J* = 3.0 Hz, 1C, C6), 63.1 (dd, *J* = 24.6, 4.3 Hz, 1C, C1), 53.8 (dd, *J* = 22.1, 22.1 Hz, 1C, C3), 37.0 (dd, *J* = 20.0, 0.6 Hz, 1C, C5) ppm; <sup>19</sup>F NMR (470 MHz, Acetone-*d*<sub>6</sub>)  $\delta$  -181.43 (dddd, *J* = 46.0, 31.4, 7.5, 5.5 Hz, 1F, F4), -191.32 (dddddd, *J* = 46.5, 23.5, 19.0, 15.8, 4.4, 1.5 Hz, 1F, F2) ppm; HRMS calcd for C<sub>6</sub>H<sub>9</sub>BrF<sub>2</sub>IO<sub>2</sub><sup>-</sup> [M - H]<sup>-</sup> 356.8804 found 356.8791.

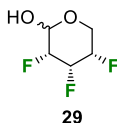

**(3R,4S,5S)-3,4,5-Trifluorotetrahydro-2H-pyran-2-ol (29).** To a stirred solution of 2,3,4-trideoxy-2,3,4-trifluoro-D-allitol **14** (185.7 mg, 0.9589 mmol, 1.0 equiv.) in water (15 mL, 0.064 M) room temperature was added NaIO<sub>4</sub> (316.3 mg, 1.479 mmol, 1.5 equiv.). The

reaction mixture was stirred at room temperature for 3 h. The water was evaporated under reduced pressure, and the crude was dissolved in acetone and CH<sub>2</sub>Cl<sub>2</sub>, filtered, and concentrated under reduced pressure. The obtained crude was purified by flash column chromatography (silica gel, EtOAc/hexanes 1:1) to give an anomeric mixture of **29** ( $\alpha/\beta$  1:15) as a white amorphous solid (138.3 mg, 0.8859 mmol, 90 % yield):  $R_f$  = 0.41 (silica, EtOAc/hexanes 3:2);  $[\alpha]_D^{25}$  = 67.54 (c 0.4, CHCl<sub>3</sub>); IR (ATR, diamond crystal)  $\nu$  3381, 2957, 1690, 1636, 1258, 1101, 1068 cm<sup>-1</sup>; only the  $\beta$  anomer has been attributed in <sup>1</sup>H NMR, <sup>13</sup>C NMR, and <sup>19</sup>F NMR; <sup>1</sup>H NMR (500 MHz, Acetone-*d*<sub>6</sub>)  $\delta$  6.20 (dd,  $J$  = 5.0, 1.6 Hz, 1H, OH), 5.29 (dddd,  $J$  = 6.5, 6.0, 5.0, 3.9 Hz, 1H, H1), 5.03 (dddd,  $J$  = 45.7, 25.5, 24.5, 2.8, 2.8 Hz, 1H, H3), 4.93 (dddddd,  $J$  = 49.1, 11.2, 4.2, 2.7, 2.7, 1.2 Hz, 1H, H4), 4.66 (dddd,  $J$  = 49.4, 11.9, 3.9, 3.0, 1.2 Hz, 1H, H2), 4.10 (ddd,  $J$  = 29.1, 13.0, 2.2 Hz, 1H, H5a), 3.89 (dddd,  $J$  = 13.0, 11.1, 6.5, 4.3 Hz, 1H, H5b) ppm; <sup>13</sup>C {<sup>1</sup>H} NMR (126 MHz, Acetone-*d*<sub>6</sub>)  $\delta$  93.4 (dd,  $J$  = 27.5, 6.5 Hz, 1C, C1), 87.6 (ddd,  $J$  = 185.4, 16.2, 1.7 Hz, 1C, C2), 86.6 (ddd,  $J$  = 186.2, 17.0, 1.0 Hz, 1C, C4), 85.9 (ddd,  $J$  = 187.9, 16.4, 16.4 Hz, 1C, C3), 61.2 (dd,  $J$  = 22.2, 5.4 Hz, 1C, C5) ppm; <sup>19</sup>F NMR (470 MHz, Acetone-*d*<sub>6</sub>)  $\delta$  -204.60 (dddd,  $J$  = 49.4, 25.5, 20.1, 13.8, 6.1 Hz, 1F, F2), -206.54 (dddddd,  $J$  = 49.0, 29.2, 24.0, 20.3, 12.6, 11.4 Hz, 1F, F4), -211.64 (dddd,  $J$  = 45.7, 20.3, 20.3, 11.9, 11.2 Hz) ppm; HRMS calcd for C<sub>5</sub>H<sub>7</sub>F<sub>3</sub>O<sub>2</sub>Na<sup>+</sup> [M + Na]<sup>+</sup> 179.0294 found 179.0296.

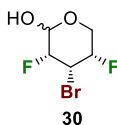

**(3R,4S,5S)-4-Bromo-3,5-difluorotetrahydro-2H-pyran-2-ol (30).** To a stirred solution of 2,3,4-trideoxy-3-bromo-2,4-difluoro-D-allitol **16** (337.2 mg, 1.354 mmol, 1.0 equiv.) in water (21 mL, 0.064 M) room temperature was added NaIO<sub>4</sub> (434.4 mg, 2.031 mmol, 1.5 equiv.). The reaction mixture was stirred at room temperature for 3 h. The water was evaporated under reduced pressure, and the crude was dissolved in acetone and CH<sub>2</sub>Cl<sub>2</sub>, filtered, and concentrated under reduced pressure. The obtained crude was purified by flash column chromatography (silica gel, EtOAc/hexanes 2:3 → 1:1) to give an anomeric mixture of **30** ( $\alpha/\beta$  1:10) as a white amorphous solid (252.7 mg, 1.164 mmol, 85 % yield):  $R_f$  = 0.36 (silica, EtOAc/hexanes 1:1);  $[\alpha]_D^{25}$  = 7.44 (c 0.3, MeOH); IR (ATR, diamond

crystal)  $\nu$  3221, 2949, 2837, 1653, 1410, 1113, 1014  $\text{cm}^{-1}$ ; only the  $\beta$  anomer has been attributed in  $^1\text{H}$  NMR,  $^{13}\text{C}$  NMR, and  $^{19}\text{F}$  NMR;  $^1\text{H}$  NMR (500 MHz,  $\text{CDCl}_3$ )  $\delta$  5.43 (dd,  $J = 6.7, 2.2$  Hz, 1H, H1), 4.68 (dddd,  $J = 46.4, 2.6, 2.4, 1.5, 1.2$  Hz, 1H, H4), 4.59 (dddd,  $J = 46.6, 2.5, 2.4, 1.2$  Hz, 1H, H2), 4.43 (dddd,  $J = 31.5, 29.9, 2.8, 2.8$  Hz, 1H, H3), 4.20 (ddd,  $J = 37.0, 13.3, 1.5$  Hz, 1H, H5a), 4.08 (ddd,  $J = 13.0, 13.0, 2.4$  Hz, 1H, H5b) ppm;  $^{13}\text{C}$   $\{^1\text{H}\}$  NMR (126 MHz,  $\text{CDCl}_3$ )  $\delta$  92.0 (d,  $J = 31.8$  Hz, 1C, C1), 87.2 (d,  $J = 185.5$  Hz, 1C, C2), 86.7 (d,  $J = 189.0$  Hz, 1C, C4), 61.9 (d,  $J = 21.5$  Hz, 1C, C5), 43.0 (dd,  $J = 18.6, 18.6$  Hz, 1C, C3) ppm;  $^{19}\text{F}$  NMR (470 MHz,  $\text{CDCl}_3$ )  $\delta$  -192.28 (dddd,  $J = 46.9, 36.7, 30.0, 22.6, 12.4$  Hz, 1F, F4), -193.17 (dddd,  $J = 47.1, 31.9, 22.6, 6.6$  Hz, 1F, F2) ppm; HRMS calcd for  $\text{C}_5\text{H}_{11}\text{BrF}_2\text{NO}^+ [\text{M} + \text{NH}_4]^+$  233.9936 found 233.9941.

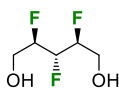

31

**(2R,3s,4S)-2,3,4-Trifluoropentane-1,5-diol (31).** (3R,4S,5S)-3,4,5-Trifluorotetrahydro-2H-pyran-2-ol **29** (126.2 mg, 0.8084 mmol, 1.0 equiv.) was reduced with  $\text{NaBH}_4$  (53.5 mg, 1.415 mmol, 1.75 equiv.) in anhydrous EtOH (8 mL, 0.1 M) following the general procedure II. The obtained crude was purified by flash column chromatography (silica gel, EtOAc/hexanes 3:2) to give **31** as a colorless oil (116.9 mg, 0.7343 mmol, 91 % yield):  $R_f = 0.36$  (silica, EtOAc/hexanes 3:2); IR (ATR, diamond crystal)  $\nu$  3344, 2953, 1691, 1456, 1259, 1043, 868  $\text{cm}^{-1}$ ;  $^1\text{H}$  NMR (500 MHz, Acetone- $d_6$ )  $\delta$  5.01 (dtt,  $J = 45.8, 14.7, 14.7, 4.8, 4.8$  Hz, 1H, H3), 4.85 (dddddd,  $J = 47.5, 15.9, 5.6, 4.7, 3.5, 0.8$  Hz, 2H, H2, H4), 4.28 (dd,  $J = 5.9, 5.9$  Hz, 2H, OH1, OH5), 3.89 (dddddd,  $J = 26.4, 12.8, 5.9, 3.3, 1.6, 0.9$  Hz, 2H, H1a, H5a), 3.83 (dddddd,  $J = 30.5, 12.7, 5.8, 5.8, 2.3, 0.9$  Hz, 2H, H1b, H5b) ppm;  $^{13}\text{C}$   $\{^1\text{H}\}$  NMR (126 MHz, Acetone- $d_6$ )  $\delta$  92.6 (ddd,  $J = 173.7, 24.4, 4.3$  Hz, 2C, C2, C4), 89.4 (dt,  $J = 174.1, 25.1, 25.1$  Hz, 1C, C3), 60.9 (ddd,  $J = 22.4, 6.8$  Hz, 2.7 Hz, 2C, C1, C5) ppm;  $^{19}\text{F}$  NMR (470 MHz, Acetone- $d_6$ )  $\delta$  -201.42 (dddddd,  $J = 48.2, 27.0, 25.6, 14.6, 12.1, 1.4$  Hz, 2F, F2, F4), -206.16 (dtttt,  $J = 45.8, 15.9, 15.9, 12.1, 12.1, 2.0, 2.0, 1.9, 1.9$  Hz, 1F, F3) ppm; HRMS calcd for  $\text{C}_5\text{H}_8\text{F}_3\text{O}_2^- [\text{M} - \text{H}]^-$  157.0482 found 157.0480.

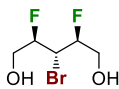

32

**(2*R*,3*S*,4*S*)-3-Bromo-2,4-difluoropentane-1,5-diol (32).** (3*R*,4*S*,5*S*)-4-Bromo-3,5-difluorotetrahydro-2*H*-pyran-2-ol **30** (252.7 mg, 1.164 mmol, 1.0 equiv.) was reduced with NaBH<sub>4</sub> (77 mg, 2.038 mmol, 1.75 equiv.) in anhydrous EtOH (12 mL, 0.1 M) following the general procedure II. The obtained crude was purified by flash column chromatography (silica gel, EtOAc/hexanes 3:7 → 1:1) to give **32** as a colorless oil (198.9 mg, 0.9081 mmol, 78 % yield): *R<sub>f</sub>* = 0.46 (silica, EtOAc/hexanes 3:2); IR (ATR, diamond crystal)  $\nu$  3325, 2943, 1636, 1425, 1234, 1030, 862 cm<sup>-1</sup>; <sup>1</sup>H NMR (500 MHz, Acetone-*d*<sub>6</sub>)  $\delta$  4.88 (dddd, *J* = 46.9, 6.0, 4.2, 4.2 Hz, 2H, H2, H4), 4.65 (tt, *J* = 11.9, 11.9, 6.0, 6.0 Hz, 1H, H3), 4.31 (dd, *J* = 5.9, 5.9 Hz, 2H, OH1, OH5), 3.94 (ddd, *J* = 26.1, 5.9, 4.2 Hz, 2H, H1b, H5b), 3.94 (ddd, *J* = 25.0, 5.9, 4.2 Hz, 2H, H1a, H5a) ppm; <sup>13</sup>C {<sup>1</sup>H} NMR (126 MHz, Acetone-*d*<sub>6</sub>)  $\delta$  94.0 (dd, *J* = 117.4, 4.8 Hz, 2C, C2, C4), 62.8 (dd, *J* = 22.4, 2.4 Hz, 2C, C1, C5), 49.0 (t, *J* = 22.7, 22.7 Hz, 1C, C3) ppm; <sup>19</sup>F NMR (470 MHz, Acetone-*d*<sub>6</sub>)  $\delta$  -188.09 (dddd, *J* = 46.9, 26.1, 25.0, 11.9, 1.1 Hz, 2F, F2, F4) ppm; HRMS calcd for C<sub>5</sub>H<sub>13</sub>BrF<sub>2</sub>NO<sub>2</sub><sup>+</sup> [M + NH<sub>4</sub>]<sup>+</sup> 236.0092 found 236.0094.

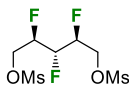

33

**(2*R*,3*S*,4*S*)-2,3,4-Trifluoropentane-1,5-diyl dimethanesulfonate (33).** To a solution of (2*R*,3*S*,4*S*)-2,3,4-trifluoropentane-1,5-diol **31** (28.8 mg, 0.1821 mmol, 1.0 equiv.) in CH<sub>2</sub>Cl<sub>2</sub> (1.8 mL, 0.1 M) at 0 °C was added Et<sub>3</sub>N (0.13 mL, 0.9105 mmol, 5.0 equiv.). MsCl (70.4  $\mu$ L, 0.9105 mmol, 5.0 equiv.) was added dropwise. The reaction mixture was stirred at 0 °C for 30 min and at room temperature for 5.5 h. The precipitate was filtered out and the organic phase was concentrated under reduced pressure. The obtained crude was purified by flash column chromatography (silica gel, EtOAc/hexanes 2:3) to give **33** as a colorless oil (49.2 mg, 0.1565 mmol, 86 % yield): *R<sub>f</sub>* = 0.45 (silica, EtOAc/hexanes 3:2); IR (NaCl)  $\nu$  2925, 2854, 1462, 1377, 1176, 961, 801 cm<sup>-1</sup>; <sup>1</sup>H NMR (500 MHz, CDCl<sub>3</sub>)  $\delta$  5.08 (dddd, *J* = 46.9, 12.6, 5.4, 5.4, 2.9 Hz, 2H, H2, H4), 4.92 (dtt, *J* = 44.7, 13.2, 13.2, 5.3, 5.3 Hz, 1H, H3), 4.55 (dddd, *J* = 24.3, 12.4, 3.0, 1.1 Hz, 2H, H1a, H5a),

4.49 (dddd,  $J = 24.8, 12.4, 5.5, 1.9$  Hz, 2H, H1b, H5b), 3.10 (s, 6H,  $2 \times \text{SO}_2\text{CH}_3$ ) ppm;  $^{13}\text{C}$  { $^1\text{H}$ } NMR (126 MHz,  $\text{CDCl}_3$ )  $\delta$  87.7 (ddd,  $J = 181.3, 26.0, 4.1$  Hz, 2C, C2, C4), 86.6 (dt,  $J = 180.2, 25.8, 25.8$  Hz, 1C, C3), 66.2 (ddd,  $J = 23.7, 6.7, 3.5$  Hz, 2C, C1, C5), 38.0 (s, 2C,  $2 \times \text{SO}_2\text{CH}_3$ ) ppm;  $^{19}\text{F}$  NMR (470 MHz,  $\text{CDCl}_3$ )  $\delta$  -201.05 (dddddd,  $J = 46.9, 24.8, 24.2, 13.2, 13.2, 1.9$  Hz, 2F, F2, F4), -203.39 (dtttt,  $J = 44.8, 13.2, 13.2, 12.6, 12.6, 1.9, 1.9, 1.1, 1.1$  Hz, 1F, F3) ppm; HRMS calcd for  $\text{C}_7\text{H}_{17}\text{F}_3\text{NO}_6\text{S}_2^+$  [ $\text{M} + \text{NH}_4$ ] $^+$  332.0444 found 332.0451.

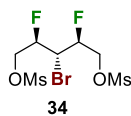

**(2R,3s,4S)-3-Bromo-2,4-difluoropentane-1,5-diyl dimethanesulfonate (34).** To a solution of (2R,3s,4S)-3-bromo-2,4-difluoropentane-1,5-diol **32** (28.1 mg, 0.1283 mmol, 1.0 equiv.) in  $\text{CH}_2\text{Cl}_2$  (1.3 mL, 0.1 M) at  $0^\circ\text{C}$  was added  $\text{Et}_3\text{N}$  (89.4  $\mu\text{L}$ , 0.6415 mmol, 5.0 equiv.).  $\text{MsCl}$  (49.6  $\mu\text{L}$ , 0.6415 mmol, 5.0 equiv.) was added dropwise. The reaction mixture was stirred at  $0^\circ\text{C}$  for 30 min and at room temperature for 5.5 h. The precipitate was filtered out and the organic phase was concentrated under reduced pressure. The obtained crude was purified by flash column chromatography (silica gel,  $\text{EtOAc}/\text{hexanes}$  2:3) to give **34** as a colorless oil (47.0 mg, 0.1253 mmol, 98 % yield):  $R_f = 0.51$  (silica,  $\text{EtOAc}/\text{hexanes}$  3:2); IR (ATR, diamond crystal)  $\nu$  2958, 2924, 2854, 1462, 1356, 1174, 1014  $\text{cm}^{-1}$ ;  $^1\text{H}$  NMR (500 MHz,  $\text{CDCl}_3$ )  $\delta$  5.09 (dddd,  $J = 46.1, 6.2, 5.0, 2.9$  Hz, 2H, H2, H4), 4.62 (dddd,  $J = 23.9, 12.3, 5.0, 1.1$  Hz, 2H, H1a, H5a), 4.58 (ddd,  $J = 23.3, 12.3, 3.0$  Hz, 2H, H1b, H5b), 4.40 (tt,  $J = 12.2, 12.2, 6.3, 6.3$  Hz, 1H, H3), 3.10 (s, 6H,  $2 \times \text{SO}_2\text{CH}_3$ ) ppm;  $^{13}\text{C}$  { $^1\text{H}$ } NMR (126 MHz,  $\text{CDCl}_3$ )  $\delta$  89.7 (dd,  $J = 184.4, 3.9$  Hz, 2C, C2, C4), 68.1 (dd,  $J = 23.8, 3.8$  Hz, 2C, C1, C5), 44.2 (t,  $J = 22.9, 22.9$  Hz, 1C, C3), 38.0 (s, 2C,  $2 \times \text{SO}_2\text{CH}_3$ ) ppm;  $^{19}\text{F}$  NMR (470 MHz,  $\text{CDCl}_3$ )  $\delta$  -186.49 (dddd,  $J = 46.6, 23.9, 23.7, 12.1$  Hz, 2F, F2, F4) ppm; HRMS calcd for  $\text{C}_7\text{H}_{17}\text{BrF}_2\text{NO}_6\text{S}_2^+$  [ $\text{M} + \text{NH}_4$ ] $^+$  391.9643 found 391.9651.

## Synthesis of amine 35

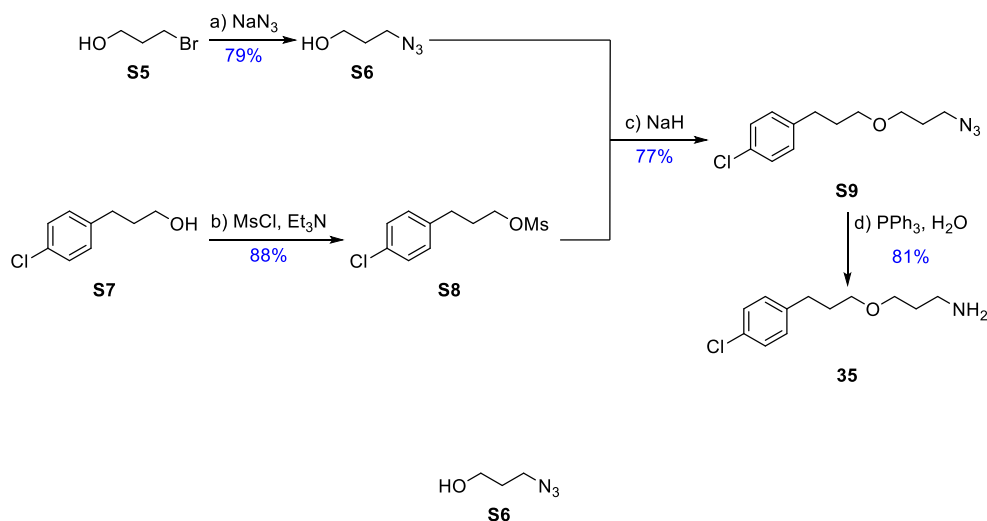

**3-Azidopropan-1-ol (S6).** To a solution of 3-bromopropan-1-ol **S5** (1.0099 g, 7.266 mmol, 1.0 equiv.) in water (7.2 mL, 1.0 M) was added NaN<sub>3</sub> (945 mg, 14.54 mmol, 2.0 equiv.). The mixture was stirred at 60 °C for 3 days. After cooling down to room temperature extracted with Et<sub>2</sub>O. The combined organic phases were dried over Na<sub>2</sub>SO<sub>4</sub>, filtered, and concentrated under reduced pressure. The obtained crude was purified by flash column chromatography (silica gel, Et<sub>2</sub>O/pentane 1:1) to give **S2** as a colorless oil (578.4 mg, 5.723 mmol, 79 % yield). The spectroscopic data derived from compound **S2** match those reported in the literature.<sup>3</sup>

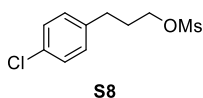

**3-(4-Chlorophenyl)propyl methanesulfonate (S8).** To a solution of 3-(4-chlorophenyl)propan-1-ol **S7** (250 mg, 1.465 mmol, 1.0 equiv.) in anhydrous CH<sub>2</sub>Cl<sub>2</sub> (4.4 mL, 0.33 M) at 0 °C was added Et<sub>3</sub>N (0.27 mL, 1.949 mmol, 1.33 equiv.) and MsCl (0.14 mL, 1.758 mmol, 1.2 equiv.). The mixture was stirred at 0 °C for 30 min and room temperature for 3 h. The reaction mixture was then diluted with CH<sub>2</sub>Cl<sub>2</sub>, and the organic phase was washed with water, 1 M HCl, and brine. The organic phase was dried over MgSO<sub>4</sub>, filtered, and concentrated under reduced pressure. The obtained crude was purified by flash column chromatography (silica gel, EtOAc/hexanes 1:5 → 3:7) to give **S4** as a colorless oil



(320.3 mg, 1.288 mmol, 88 % yield). The spectroscopic data derived from compound **S4** match those reported in the literature.<sup>4</sup>

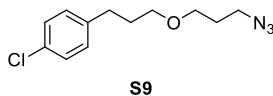

**1-(3-(3-Azidopropoxy)propyl)-4-chlorobenzene (S9).** To a solution of 3-azidopropan-1-ol **S6** (106.2 mg, 1.051 mmol, 1.0 equiv.) in *N,N*-dimethylacetamide (3.5 mL, 0.3 M) was added 60 % NaH in mineral oil (126 mg, 3.153 mmol, 3 equiv.). The mixture was heated at 50 °C for 1 h. The reaction mixture was cooled to room temperature and a solution of 3-(4-chlorophenyl)propyl methanesulfonate **S8** (300 mg, 1.206 mmol, 1.15 equiv.) in *N,N*-dimethylacetamide (1.8 mL) was added. The mixture was stirred at room temperature for 5 h, quenched with a mixture of water/brine (1:1), then extracted with toluene. The combined organic phases were washed with brine, dried over MgSO<sub>4</sub>, filtered, and concentrated under reduced pressure. The obtained crude was purified by flash chromatography (silica gel, Et<sub>2</sub>O/pentane 0:1 → 3:17) to give **S5** as a colorless oil (205.5 mg, 0.8099 mmol, 77 % yield): *R<sub>f</sub>* = 0.53 (silica, Et<sub>2</sub>O/pentane 1:9); IR (NaCl)  $\nu$  3027, 2945, 2865, 2097, 1492, 1119, 801 cm<sup>-1</sup>; <sup>1</sup>H NMR (500 MHz, CDCl<sub>3</sub>)  $\delta$  7.24 (d, *J* = 8.3 Hz, 2H, H<sub>*o*-Cl</sub>), 7.11 (d, *J* = 8.5 Hz, 2H, H<sub>*m*-Cl</sub>), 3.48 (t, *J* = 6.0, 6.0 Hz, 2H, -O-CH<sub>2</sub>-CH<sub>2</sub>-CH<sub>2</sub>-N<sub>3</sub>), 3.41 (t, *J* = 6.4, 6.4 Hz, 2H, Ar-CH<sub>2</sub>-CH<sub>2</sub>-CH<sub>2</sub>-O-), 3.40 (t, *J* = 6.5, 6.5 Hz, 2H, -O-CH<sub>2</sub>-CH<sub>2</sub>-CH<sub>2</sub>-N<sub>3</sub>), 2.66 (t, *J* = 7.5, 7.5 Hz, 2H, Ar-CH<sub>2</sub>-CH<sub>2</sub>-CH<sub>2</sub>-O-), 1.86 (tt, *J* = 7.5, 7.5, 6.4, 6.4 Hz, 2H, Ar-CH<sub>2</sub>-CH<sub>2</sub>-CH<sub>2</sub>-O-), 1.85 (tt, *J* = 6.5, 6.5, 6.0, 6.0 Hz, 2H, -O-CH<sub>2</sub>-CH<sub>2</sub>-CH<sub>2</sub>-N<sub>3</sub>) ppm; <sup>13</sup>C {<sup>1</sup>H} NMR (126 MHz, CDCl<sub>3</sub>)  $\delta$  140.5 (s, 1C, C<sub>*p*-Cl</sub>), 131.6 (s, 1C, C-Cl), 129.9 (s, 2C, C<sub>*m*-Cl</sub>), 128.6 (s, 2C, C<sub>*o*-Cl</sub>), 70.0 (s, 1C, Ar-CH<sub>2</sub>-CH<sub>2</sub>-CH<sub>2</sub>-O-), 67.5 (s, 1C, -O-CH<sub>2</sub>-CH<sub>2</sub>-CH<sub>2</sub>-N<sub>3</sub>), 48.7 (s, 1C, -O-CH<sub>2</sub>-CH<sub>2</sub>-CH<sub>2</sub>-N<sub>3</sub>), 31.8 (s, 1C, Ar-CH<sub>2</sub>-CH<sub>2</sub>-CH<sub>2</sub>-O-), 31.3 (s, 1C, Ar-CH<sub>2</sub>-CH<sub>2</sub>-CH<sub>2</sub>-O-), 29.4 (s, 1C, -O-CH<sub>2</sub>-CH<sub>2</sub>-CH<sub>2</sub>-N<sub>3</sub>) ppm; HRMS calcd for C<sub>12</sub>H<sub>17</sub>ClN<sub>3</sub>O<sup>+</sup> [M + H]<sup>+</sup> 254.1055 found 254.1058.

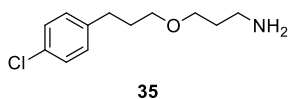

**3-(3-(4-Chlorophenyl)propoxy)propan-1-amine (35).** To a solution of 1-(3-(3-azidopropoxy)propyl)-4-chlorobenzene **S5** (145.3 mg, 0.5727 mmol, 1.0 equiv.) in dry THF **S24**

(5.7 mL, 0.1 M) was added PPh<sub>3</sub> (225.3 mg, 0.8590 mmol, 1.5 equiv.). After stirring at room temperature for 2 h, water (0.27 mL, 14.60 mmol, 25.5 equiv.) was added, and the mixture was stirred for 68 h at room temperature. The reaction mixture was evaporated to dryness and the obtained crude was purified by flash column chromatography (silica gel, MeOH/CH<sub>2</sub>Cl<sub>2</sub> 1:19 → 1:4) to give **35** as a colorless oil (105.1 mg, 0.4615 mmol, 81 % yield): *R<sub>f</sub>* = 0.40 (silica, MeOH/CH<sub>2</sub>Cl<sub>2</sub> 1:5); IR (NaCl)  $\nu$  3406, 2927, 2866, 1492, 1112, 1015, 801 cm<sup>-1</sup>; <sup>1</sup>H NMR (500 MHz, CDCl<sub>3</sub>)  $\delta$  7.23 (d, *J* = 8.4 Hz, 2H, H<sub>o-Cl</sub>), 7.11 (d, *J* = 8.5 Hz, 2H, H<sub>m-Cl</sub>), 3.49 (t, *J* = 6.1, 6.1 Hz, 2H, -O-CH<sub>2</sub>-CH<sub>2</sub>-CH<sub>2</sub>-NH<sub>2</sub>), 3.40 (t, *J* = 6.4, 6.4 Hz, 2H, Ar-CH<sub>2</sub>-CH<sub>2</sub>-CH<sub>2</sub>-O-), 3.15 – 2.94 (m, 2H, NH<sub>2</sub>), 2.89 (t, *J* = 6.8, 6.7 Hz, 2H, -O-CH<sub>2</sub>-CH<sub>2</sub>-CH<sub>2</sub>-NH<sub>2</sub>), 2.64 (t, *J* = 7.9, 7.5 Hz, 2H, Ar-CH<sub>2</sub>-CH<sub>2</sub>-CH<sub>2</sub>-O-), 1.89 – 1.82 (m, 2H, Ar-CH<sub>2</sub>-CH<sub>2</sub>-CH<sub>2</sub>-O-), 1.81 – 1.76 (m, 2H, -O-CH<sub>2</sub>-CH<sub>2</sub>-CH<sub>2</sub>-NH<sub>2</sub>) ppm; <sup>13</sup>C {<sup>1</sup>H} NMR (126 MHz, CDCl<sub>3</sub>)  $\delta$  140.5 (s, 1C, C<sub>p-Cl</sub>), 131.6 (s, 1C, C-Cl), 129.9 (s, 2C, C<sub>m-Cl</sub>), 128.5 (s, 2C, C<sub>o-Cl</sub>), 70.1 (s, 1C, Ar-CH<sub>2</sub>-CH<sub>2</sub>-CH<sub>2</sub>-O-), 69.1 (s, 1C, -O-CH<sub>2</sub>-CH<sub>2</sub>-CH<sub>2</sub>-NH<sub>2</sub>), 39.6 (s, 1C, -O-CH<sub>2</sub>-CH<sub>2</sub>-CH<sub>2</sub>-NH<sub>2</sub>), 32.1 (s, 1C, -O-CH<sub>2</sub>-CH<sub>2</sub>-CH<sub>2</sub>-NH<sub>2</sub>), 31.8 (s, 1C, Ar-CH<sub>2</sub>-CH<sub>2</sub>-CH<sub>2</sub>-O-), 31.3 (s, 1C, Ar-CH<sub>2</sub>-CH<sub>2</sub>-CH<sub>2</sub>-O-) ppm; HRMS calcd for C<sub>12</sub>H<sub>19</sub>ClNO<sup>+</sup> [M + H]<sup>+</sup> 228.1150 found 228.1155.

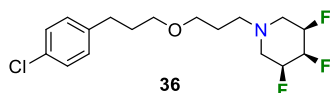

**(3R, 4S, 5S)-1-(3-(3-(4-Chlorophenyl)propoxy)propyl)-3,4,5-trifluoropiperidine (36).**

To a solution of (2*R*,3*S*,4*S*)-2,3,4-trifluoropentane-1,5-diyl dimethanesulfonate **33** (23.5 mg, 0.07477 mmol, 1.0 equiv.) in anhydrous EtOH (0.75 mL, 0.1 M) in a sealed tube was added 3-(3-(4-chlorophenyl)propoxy)propan-1-amine **35** (39.6 mg, 0.1739 mmol, 2.3 equiv.). The reaction mixture was stirred at 90 °C for 17 h. After being cooled down to room temperature, the volatiles were evaporated under reduced pressure. The obtained crude was purified by flash column chromatography (silica gel, EtOAc/hexanes 1:9 → 1:1) which permitted to recover 11.5 mg of **33**. The unclean fraction containing the desired product was then purified by flash column chromatography (silica gel, acetone/toluene 1:99 → 1:49) to give **35** as a colorless oil (5.0 mg, 0.01429 mmol, 19 % yield, 37 % yield brsm): *R<sub>f</sub>* = 0.38 (silica, EtOAc/hexanes 2:3); IR (NaCl)  $\nu$  2927, 2851, 1743, 1491, 1460, 1118, 1095 cm<sup>-1</sup>; <sup>1</sup>H NMR (500 MHz, CDCl<sub>3</sub>)  $\delta$  7.24 (d, *J* = 8.1 Hz, 2H, H<sub>o-Cl</sub>), 7.11 (d,

$J = 8.0$  Hz, 2H,  $H_{m-Cl}$ ), 5.11 (dbr,  $J = 55.2$  Hz, 1H, -CHF-CHF-CHF-), 4.63 (sbr, 2H, -N-CH<sub>2</sub>-CHF-), 3.44 (t,  $J = 6.2, 6.2$  Hz, 2H, -O-CH<sub>2</sub>-CH<sub>2</sub>-CH<sub>2</sub>-N-), 3.39 (t,  $J = 6.3, 6.3$  Hz, 2H, Ar-CH<sub>2</sub>-CH<sub>2</sub>-CH<sub>2</sub>-O-), 3.09 – 2.85 (m, 2H, -O-CH<sub>2</sub>-CH<sub>2</sub>-CH<sub>2</sub>-N-), 2.80 – 2.47 (m, 4H, 2×N-CH<sub>2</sub>-CHF-), 2.65 (t,  $J = 7.7, 7.7$  Hz, 2H, Ar-CH<sub>2</sub>-CH<sub>2</sub>-CH<sub>2</sub>-O-), 1.85 (tt,  $J = 6.8, 6.8, 6.8, 6.8$  Hz, 2H, Ar-CH<sub>2</sub>-CH<sub>2</sub>-CH<sub>2</sub>-O-), 1.95 – 1.70 (m, 2H, -O-CH<sub>2</sub>-CH<sub>2</sub>-CH<sub>2</sub>-N-) ppm; <sup>13</sup>C {<sup>1</sup>H} NMR (126 MHz, CDCl<sub>3</sub>) δ 140.4 (s, 1C, C<sub>p-Cl</sub>), 131.7 (s, 1C, C-Cl), 129.9 (s, 2C, C<sub>m-Cl</sub>), 128.6 (s, 2C, C<sub>o-Cl</sub>), 87.8 (s, 1C, -CHF-CHF-CHF-), 86.4 (s, 2C, 2×N-CH<sub>2</sub>-CHF-), 70.1 (s, 1C, Ar-CH<sub>2</sub>-CH<sub>2</sub>-CH<sub>2</sub>-O-), 68.5 (s, 1C, O-CH<sub>2</sub>-CH<sub>2</sub>-CH<sub>2</sub>-N-), 54.3 (s, 1C, -N-CH<sub>2</sub>-CHF-), 50.2 (s, 1C, -O-CH<sub>2</sub>-CH<sub>2</sub>-CH<sub>2</sub>-N-), 31.9 (s, 1C, Ar-CH<sub>2</sub>-CH<sub>2</sub>-CH<sub>2</sub>-O-), 31.2 (s, 1C, Ar-CH<sub>2</sub>-CH<sub>2</sub>-CH<sub>2</sub>-O-), 27.0 (s, 1C, -O-CH<sub>2</sub>-CH<sub>2</sub>-CH<sub>2</sub>-N-) ppm; <sup>19</sup>F NMR (470 MHz, CDCl<sub>3</sub>) δ -199.48 – -200.77 (m, 3F) ppm; HRMS calcd for C<sub>17</sub>H<sub>24</sub>ClF<sub>3</sub>NO<sup>+</sup> [M + H]<sup>+</sup> 350.1493 found 350.1508.

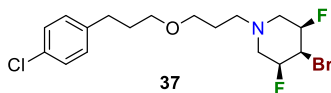

**(3R, 4s, 5S)-4-Bromo-1-(3-(3-(4-chlorophenyl)propoxy)propyl)-3,5-difluoropiperidine (37).** To a solution of (2R,3s,4S)-3-bromo-2,4-difluoropentane-1,5-diyl dimethanesulfonate **34** (25.5 mg, 0.06796 mmol, 1.0 equiv.) in anhydrous EtOH (0.7 mL, 0.1 M) in a sealed tube was added 3-(3-(4-chlorophenyl)propoxy)propan-1-amine **35** (38.7 mg, 0.1699 mmol, 2.5 equiv.). The reaction mixture was stirred at 90 °C for 24 h. After being cooled down to room temperature, the volatiles were evaporated under reduced pressure. The obtained crude was purified by flash column chromatography (silica gel, EtOAc/hexanes 1:9 → 1:1) which permitted to recover 10.7 mg of **34** and 5.0 mg of an elimination product. The unclean fraction containing the desired product was then purified by flash column chromatography (silica gel, acetone/toluene 1:99 → 1:49) to give **36** as a colorless oil (5.0 mg, 0.01217 mmol, 18 % yield, 31 % yield brsm, 78 % purity):  $R_f = 0.40$  (silica, acetone/toluene 1:9); IR (NaCl)  $\nu$  2925, 2854, 1744, 1492, 1463, 1116, 1092 cm<sup>-1</sup>; <sup>1</sup>H NMR (500 MHz, CDCl<sub>3</sub>) δ 7.24 (d,  $J = 8.4$  Hz, 2H,  $H_{o-Cl}$ ), 7.11 (d,  $J = 8.5$  Hz, 2H,  $H_{m-Cl}$ ), 4.84 – 4.51 (m, 3H, 2×CHF, CHBr), 3.44 (t,  $J = 6.2, 6.2$  Hz, 2H, -O-CH<sub>2</sub>-CH<sub>2</sub>-CH<sub>2</sub>-N-), 3.39 (t,  $J = 6.3, 6.3$  Hz, 2H, Ar-CH<sub>2</sub>-CH<sub>2</sub>-CH<sub>2</sub>-O-), 3.01 – 2.68 (m, 4H, 2×N-CH<sub>2</sub>-CHF), 2.65 (dd,  $J = 8.5, 6.8$  Hz, 2H, Ar-CH<sub>2</sub>-CH<sub>2</sub>-CH<sub>2</sub>-O-), 1.89 – 1.81 (m, 2H Ar-CH<sub>2</sub>-CH<sub>2</sub>-

CH<sub>2</sub>-O-), 1.81 – 1.74 (m, 2H, -O-CH<sub>2</sub>-CH<sub>2</sub>-CH<sub>2</sub>-N-), 1.72 – 1.65 (m, 2H, -O-CH<sub>2</sub>-CH<sub>2</sub>-CH<sub>2</sub>-N-) ppm; <sup>13</sup>C {<sup>1</sup>H} NMR (126 MHz, CDCl<sub>3</sub>) δ 140.5 (s, 1C, C<sub>p</sub>-Cl), 131.7 (s, 1C, C-Cl), 129.9 (s, 2C, C<sub>m</sub>-Cl), 128.6 (s, 2C, C<sub>o</sub>-Cl), 86.2 (s, 2C, 2×CHF), 84.9 (s, 1C, CHBr), 70.1 (s, 1C, Ar-CH<sub>2</sub>-CH<sub>2</sub>-CH<sub>2</sub>-O-), 68.6 (s, 1C, O-CH<sub>2</sub>-CH<sub>2</sub>-CH<sub>2</sub>-N-), 68.3 (s, 2C, N-CH<sub>2</sub>), 54.4 (s, 1C, O-CH<sub>2</sub>-CH<sub>2</sub>-CH<sub>2</sub>-N-), 52.6 (s, 1C, O-CH<sub>2</sub>-CH<sub>2</sub>-CH<sub>2</sub>-N-), 31.8 (s, 1C, Ar-CH<sub>2</sub>-CH<sub>2</sub>-CH<sub>2</sub>-O-), 31.2 (s, 1C, Ar-CH<sub>2</sub>-CH<sub>2</sub>-CH<sub>2</sub>-O-) ppm; <sup>19</sup>F NMR (470 MHz, CDCl<sub>3</sub>) δ -186.72 – -188.37 (m, 2F) ppm; HRMS calcd for C<sub>17</sub>H<sub>24</sub>BrClF<sub>2</sub>NO<sup>+</sup> [M + H]<sup>+</sup> 410.0692 found 410.0697.

## II. Crystal structure determination

**Table S1.** Crystal data and structure refinement for compound tritosyl-14

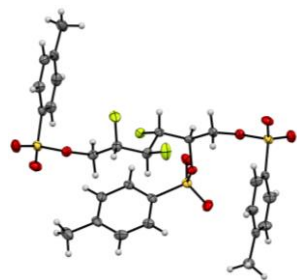

X-ray-derived ORTEP

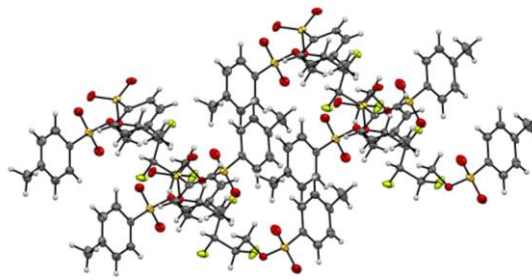

Extended packing arrangement

|                                           |                                                                              |
|-------------------------------------------|------------------------------------------------------------------------------|
| Empirical formula                         | C <sub>27</sub> H <sub>29</sub> F <sub>3</sub> O <sub>9</sub> S <sub>3</sub> |
| Formula weight                            | 650.38                                                                       |
| Temperature [K]                           | 100                                                                          |
| Crystal system                            | monoclinic                                                                   |
| Space group (number)                      | <i>P</i> 2 <sub>1</sub> (4)                                                  |
| <i>a</i> [Å]                              | 11.1881(7)                                                                   |
| <i>b</i> [Å]                              | 9.6923(6)                                                                    |
| <i>c</i> [Å]                              | 27.0368(16)                                                                  |
| $\alpha$ [°]                              | 90                                                                           |
| $\beta$ [°]                               | 94.553(3)                                                                    |
| $\gamma$ [°]                              | 90                                                                           |
| Volume [Å <sup>3</sup> ]                  | 2922.6(3)                                                                    |
| <i>Z</i>                                  | 4                                                                            |
| $\rho_{\text{calc}}$ [gcm <sup>-3</sup> ] | 1.479                                                                        |
| $\mu$ [mm <sup>-1</sup> ]                 | 2.954                                                                        |
| <i>F</i> (000)                            | 1352                                                                         |
| Crystal size [mm <sup>3</sup> ]           | 0.157×0.091×0.085                                                            |
| Crystal colour                            | clear light colourless                                                       |
| Crystal shape                             | Block                                                                        |
| Radiation                                 | Cu <i>K</i> <sub><math>\alpha</math></sub> ( $\lambda$ =1.54178 Å)           |
| 2 $\theta$ range [°]                      | 3.28 to 140.57 (0.82 Å)                                                      |
| Index ranges                              | -13 ≤ <i>h</i> ≤ 13<br>-10 ≤ <i>k</i> ≤ 11<br>-32 ≤ <i>l</i> ≤ 32            |
| Reflections collected                     | 35261<br>9642                                                                |
| Independent reflections                   | <i>R</i> <sub>int</sub> = 0.0351<br><i>R</i> <sub>sigma</sub> = 0.0329       |
| Completeness to $\theta = 67.679^\circ$   | 99.3 %                                                                       |
| Data / Restraints / Parameters            | 9642 / 1 / 763                                                               |
| Goodness-of-fit on <i>F</i> <sup>2</sup>  | 1.039                                                                        |
| Final <i>R</i> indexes                    | <i>R</i> <sub>1</sub> = 0.0494                                               |
| [ <i>I</i> ≥ 2 $\sigma$ ( <i>I</i> )]     | w <i>R</i> <sub>2</sub> = 0.1288                                             |
| Final <i>R</i> indexes                    | <i>R</i> <sub>1</sub> = 0.0517                                               |
| [all data]                                | w <i>R</i> <sub>2</sub> = 0.1309                                             |
| Largest peak/hole [eÅ <sup>-3</sup> ]     | 0.99/-0.37                                                                   |
| Flack X parameter                         | 0.000(13)                                                                    |

**Table S2.** Crystal data and structure refinement for compound **24**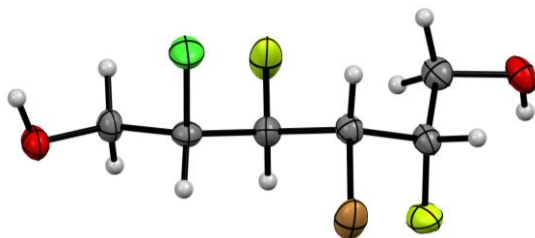

X-ray-derived ORTEP

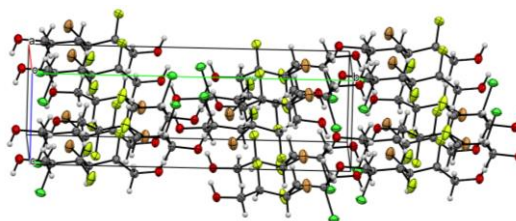

Extended packing arrangement

|                                           |                                                                        |
|-------------------------------------------|------------------------------------------------------------------------|
| Empirical formula                         | C <sub>6</sub> H <sub>10</sub> BrClF <sub>2</sub> O <sub>2</sub>       |
| Formula weight                            | 267.50                                                                 |
| Temperature [K]                           | 150                                                                    |
| Crystal system                            | orthorhombic                                                           |
| Space group (number)                      | <i>P</i> 2 <sub>1</sub> 2 <sub>1</sub> 2 (18)                          |
| <i>a</i> [Å]                              | 10.7019(6)                                                             |
| <i>b</i> [Å]                              | 17.3028(10)                                                            |
| <i>c</i> [Å]                              | 4.9473(3)                                                              |
| $\alpha$ [°]                              | 90                                                                     |
| $\beta$ [°]                               | 90                                                                     |
| $\gamma$ [°]                              | 90                                                                     |
| Volume [Å <sup>3</sup> ]                  | 916.11(9)                                                              |
| <i>Z</i>                                  | 4                                                                      |
| $\rho_{\text{calc}}$ [gcm <sup>-3</sup> ] | 1.939                                                                  |
| $\mu$ [mm <sup>-1</sup> ]                 | 5.839                                                                  |
| <i>F</i> (000)                            | 528                                                                    |
| Crystal size [mm <sup>3</sup> ]           | 0.03×0.07×0.21                                                         |
| Crystal colour                            | clear light colourless                                                 |
| Crystal shape                             | plate                                                                  |
| Radiation                                 | Ga <i>K</i> <sub><math>\alpha</math></sub> ( $\lambda$ =1.34139 Å)     |
| 2 $\theta$ range [°]                      | 8.45 to 112.92 (0.80 Å)                                                |
| Index ranges                              | -12 ≤ <i>h</i> ≤ 13<br>-20 ≤ <i>k</i> ≤ 21<br>-5 ≤ <i>l</i> ≤ 5        |
| Reflections collected                     | 8226<br>1770                                                           |
| Independent reflections                   | <i>R</i> <sub>int</sub> = 0.0504<br><i>R</i> <sub>sigma</sub> = 0.0391 |
| Completeness to $\theta = 53.594^\circ$   | 100.0 %                                                                |
| Data / Restraints / Parameters            | 1770 / 0 / 112                                                         |
| Goodness-of-fit on <i>F</i> <sup>2</sup>  | 1.093                                                                  |
| Final <i>R</i> indexes                    | <i>R</i> <sub>1</sub> = 0.0299                                         |
| [ <i>I</i> ≥ 2 $\sigma$ ( <i>I</i> )]     | w <i>R</i> <sub>2</sub> = 0.0676                                       |
| Final <i>R</i> indexes                    | <i>R</i> <sub>1</sub> = 0.0367                                         |
| [all data]                                | w <i>R</i> <sub>2</sub> = 0.0699                                       |
| Largest peak/hole [eÅ <sup>-3</sup> ]     | 0.74/-0.40                                                             |
| Flack <i>X</i> parameter                  | 0.09(5)                                                                |

### III. NMR spectra of compounds

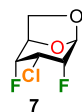

<sup>1</sup>H NMR Spectrum  
(CDCl<sub>3</sub>, 500 MHz)

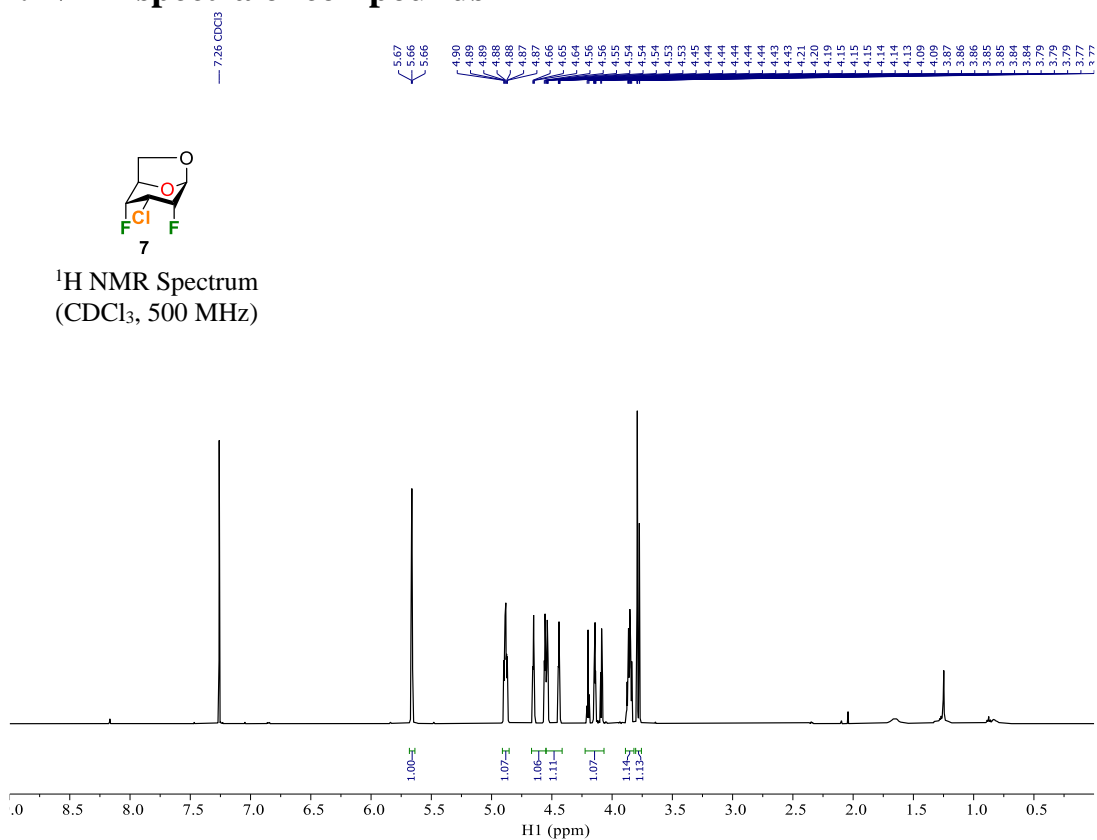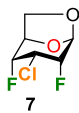

<sup>13</sup>C NMR Spectrum  
(CDCl<sub>3</sub>, 126 MHz)

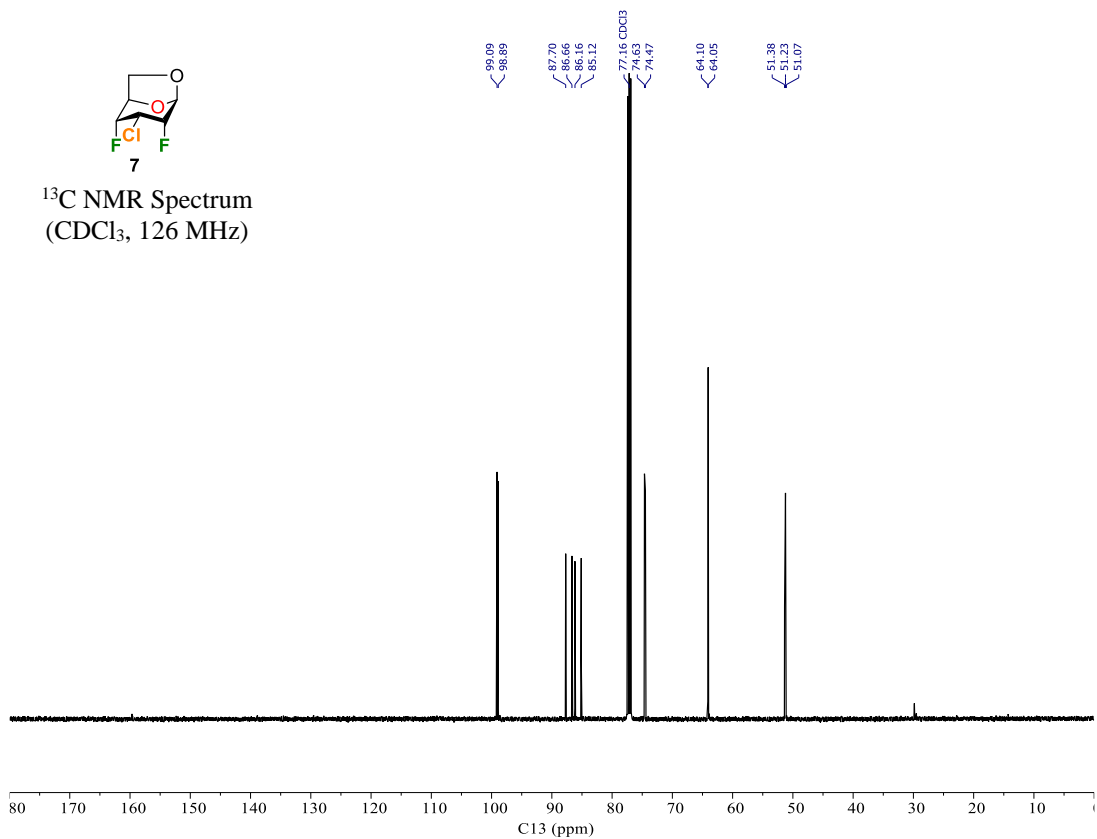

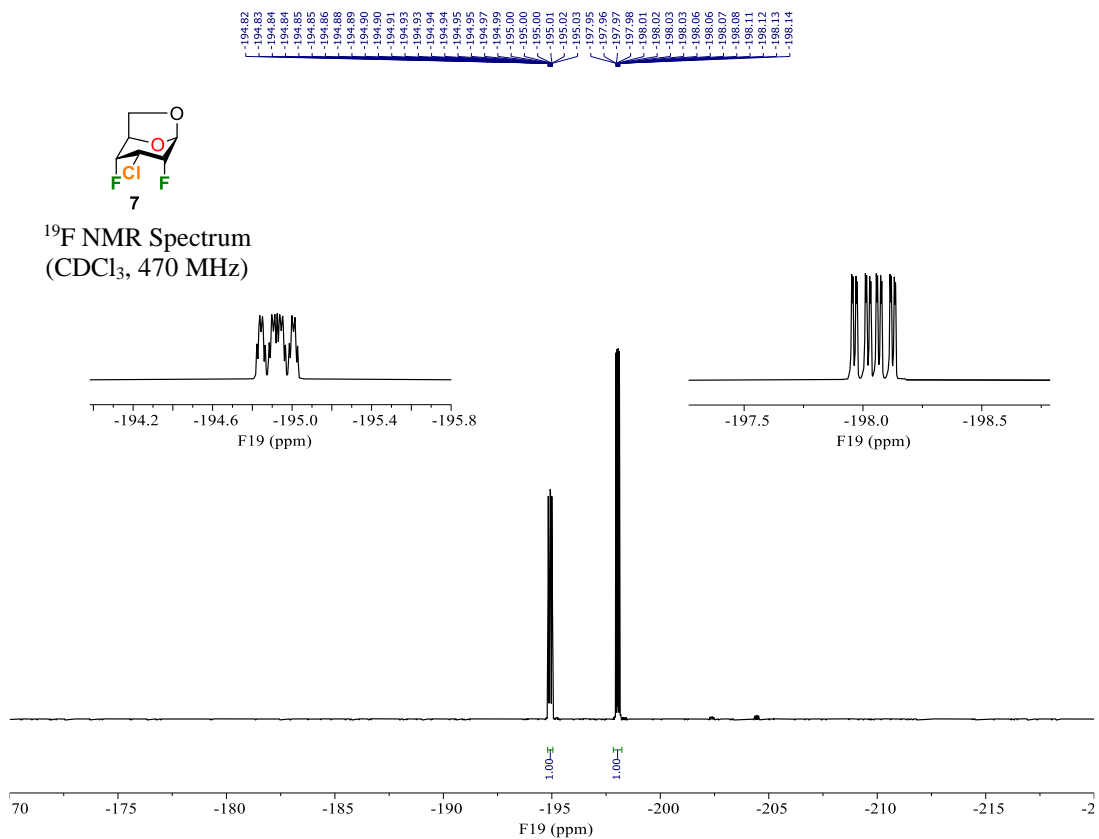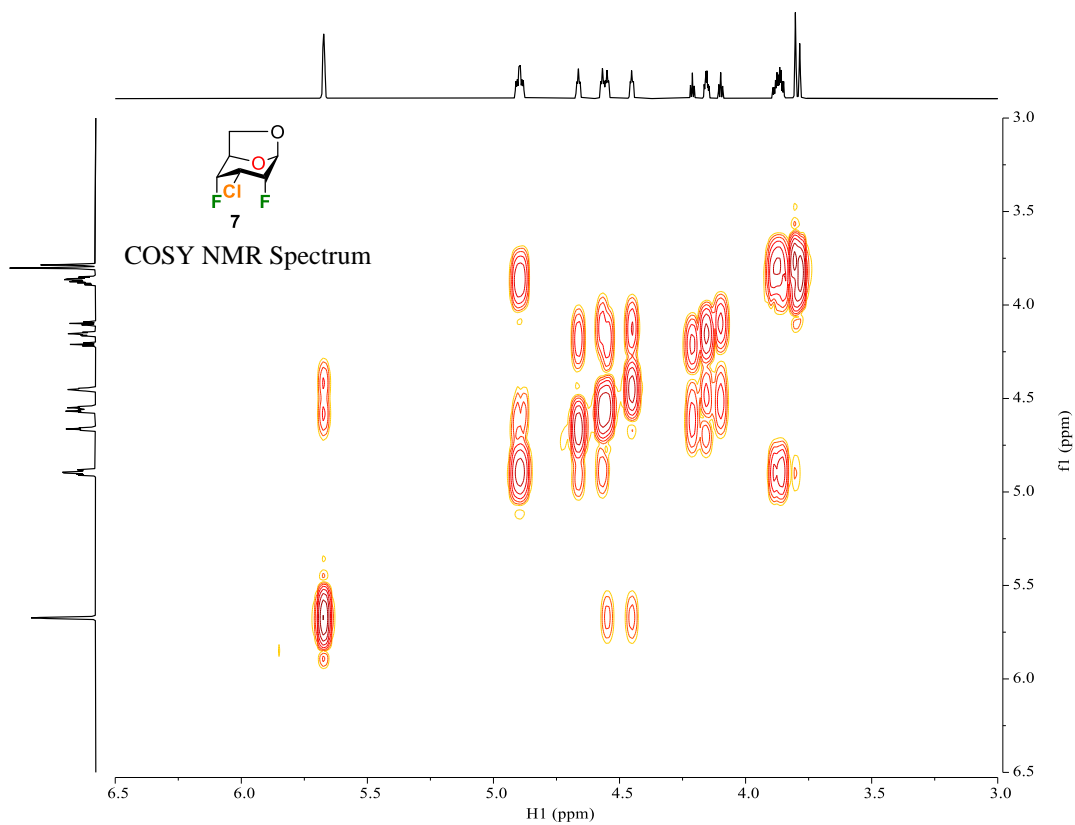



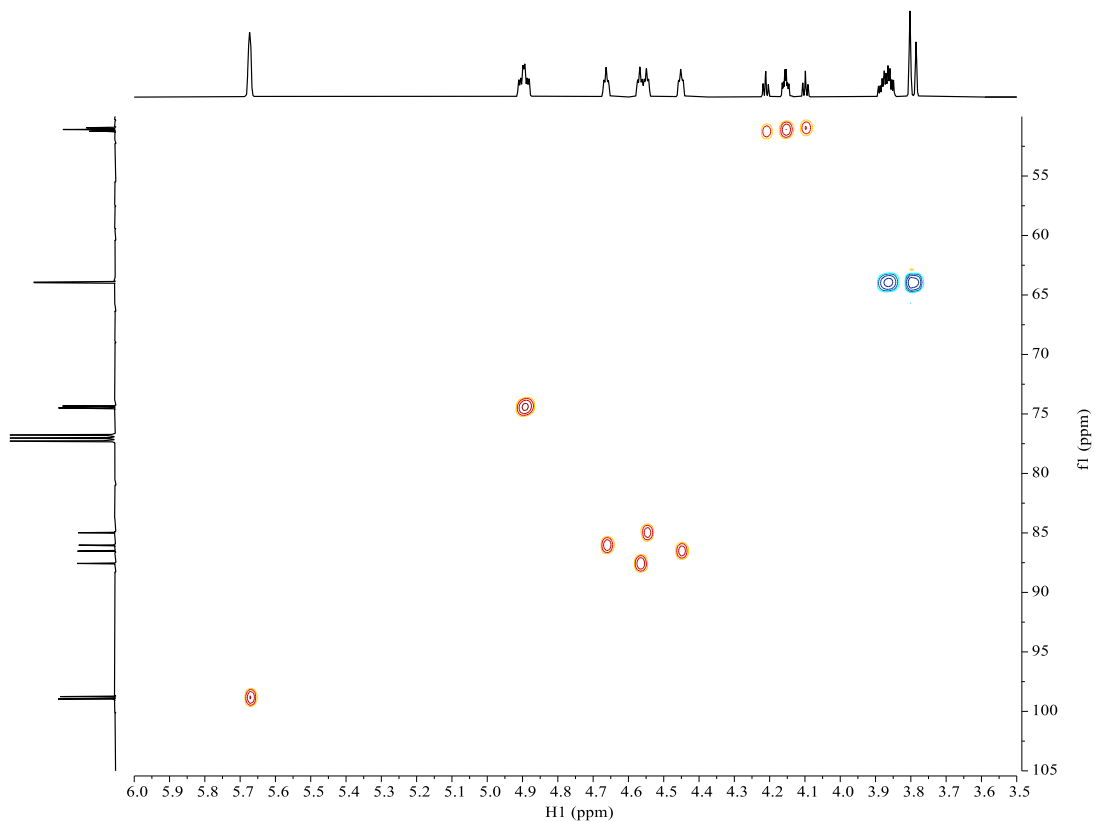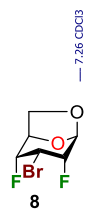

<sup>1</sup>H NMR Spectrum (CDCl<sub>3</sub>, 500 MHz)

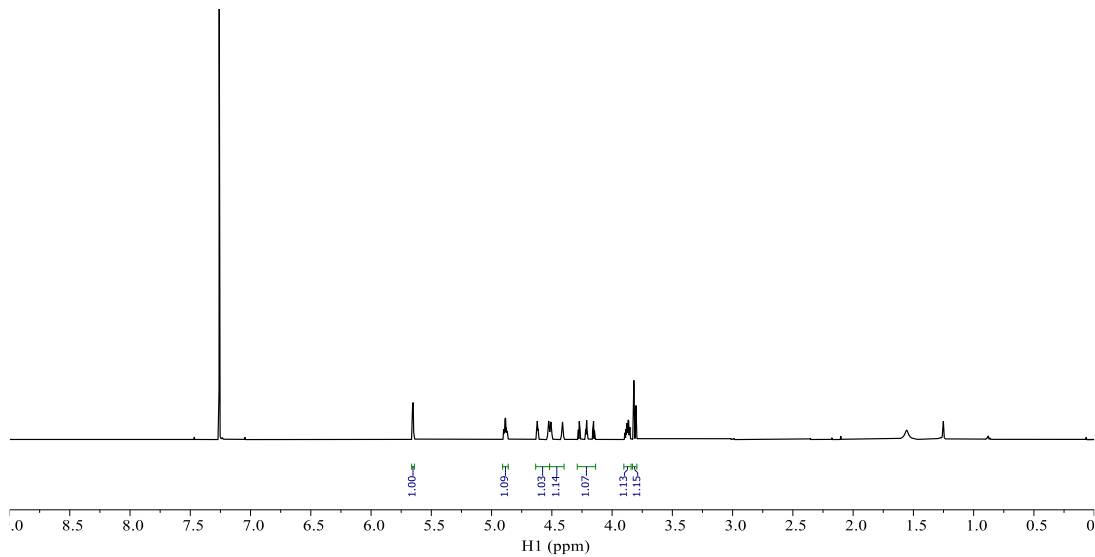

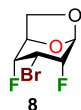

$^{13}\text{C}$  NMR Spectrum  
( $\text{CDCl}_3$ , 126 MHz)

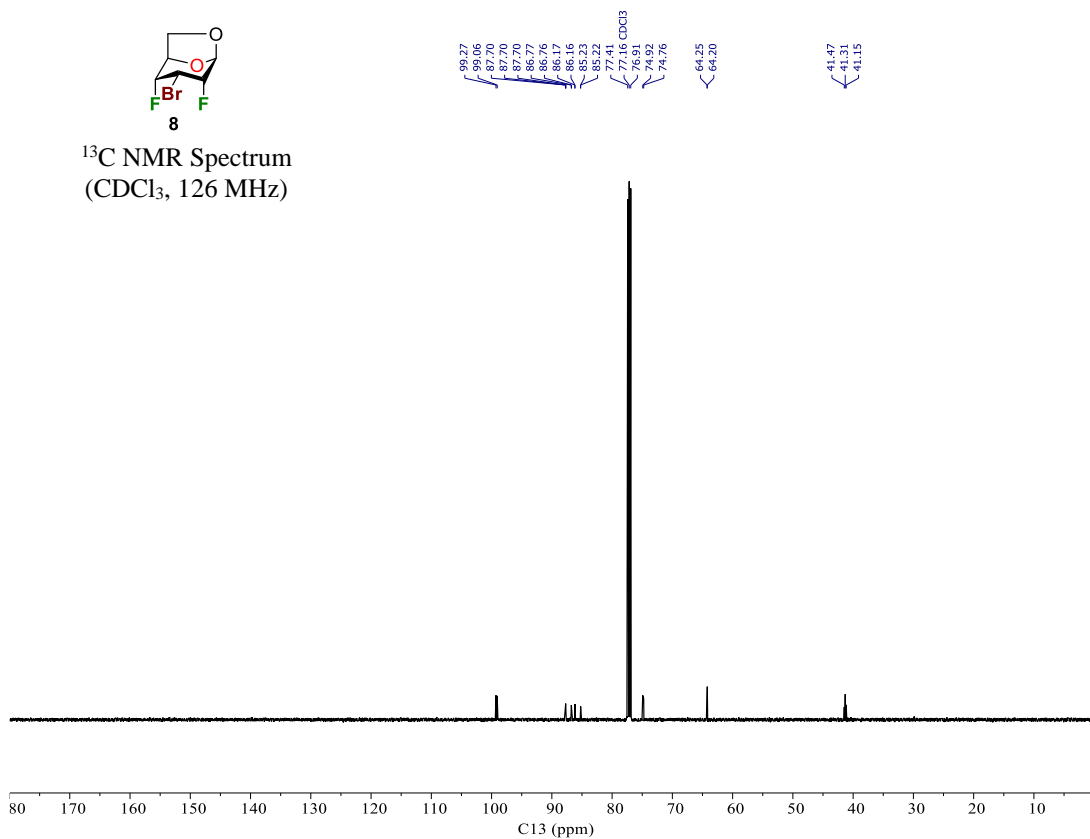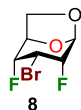

$^{19}\text{F}$  NMR Spectrum  
( $\text{CDCl}_3$ , 470 MHz)

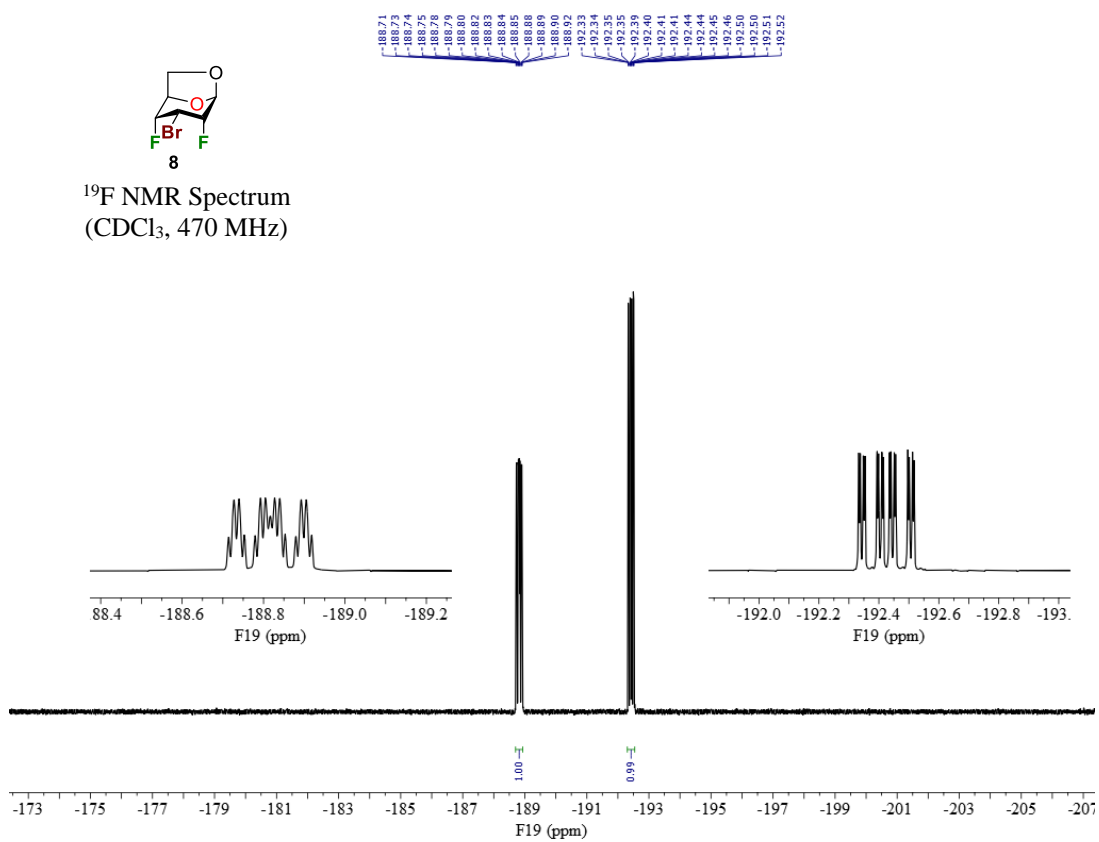

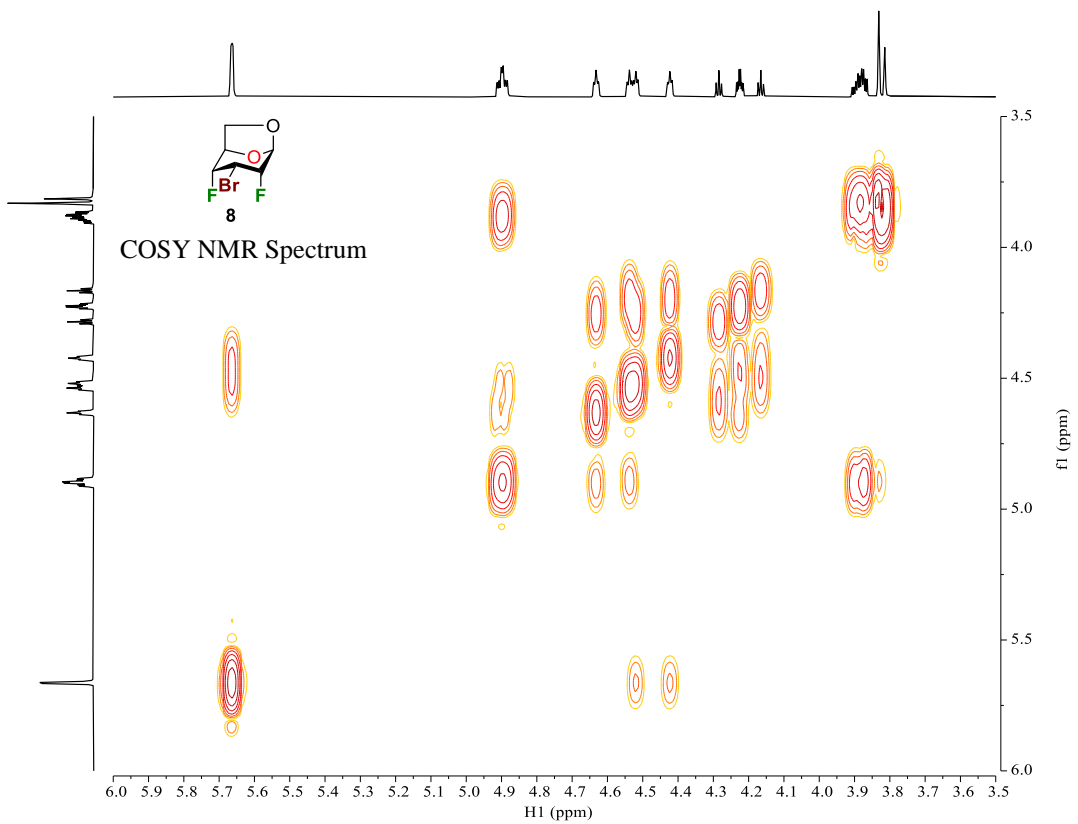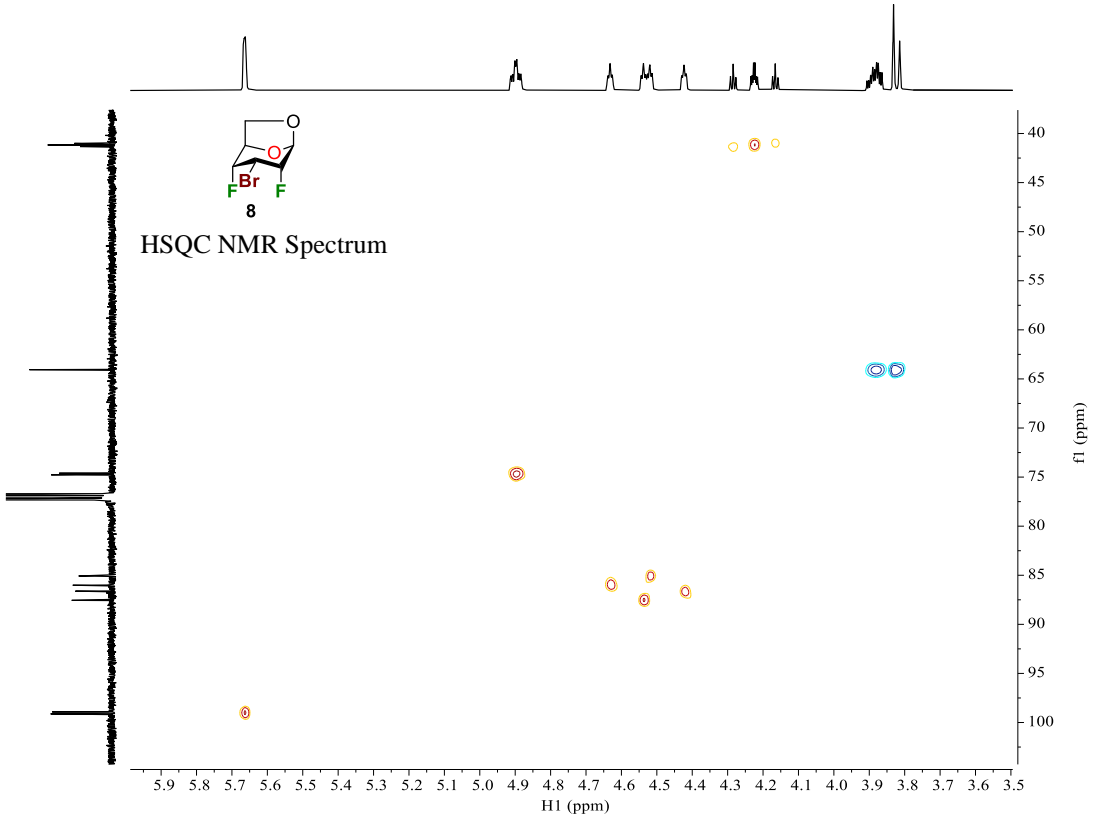

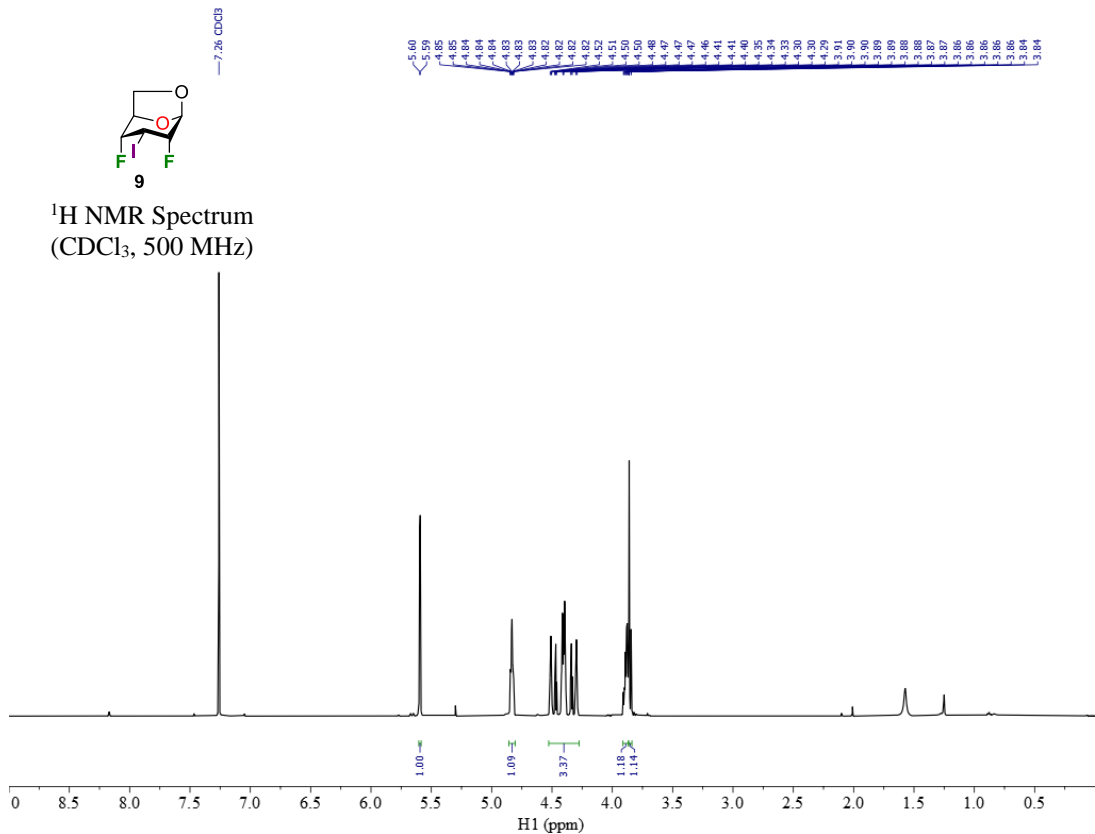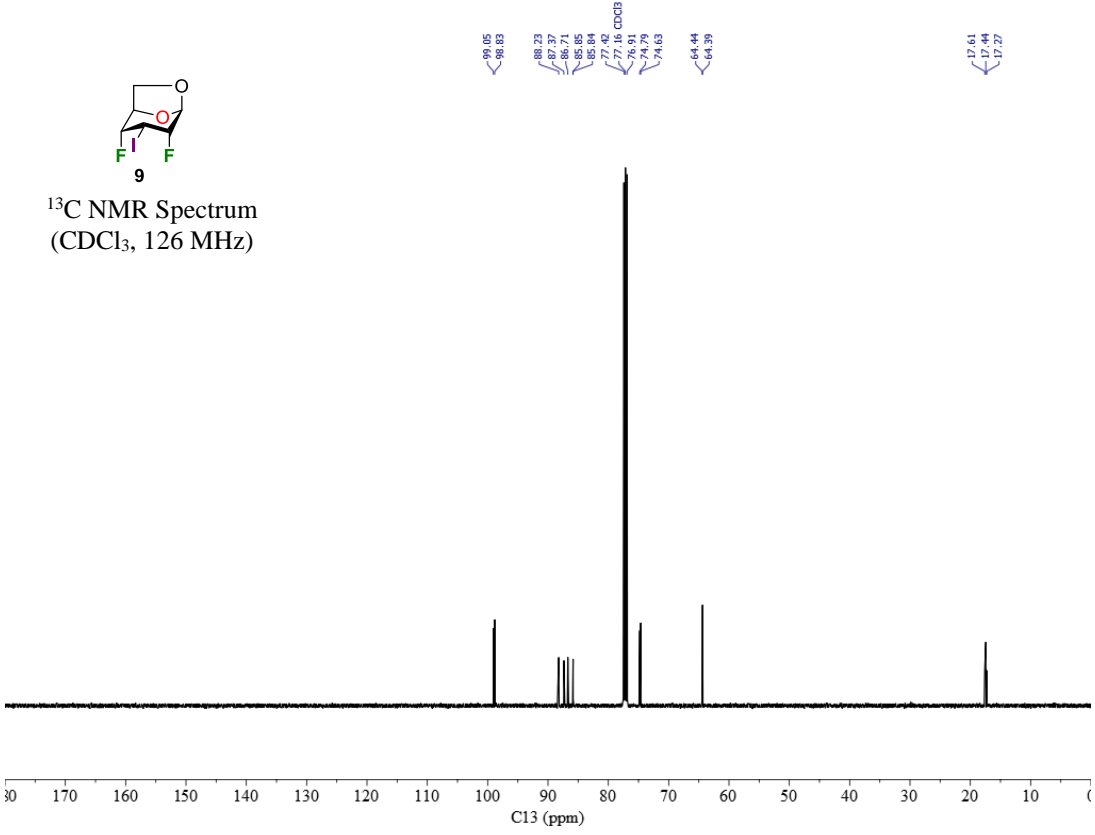

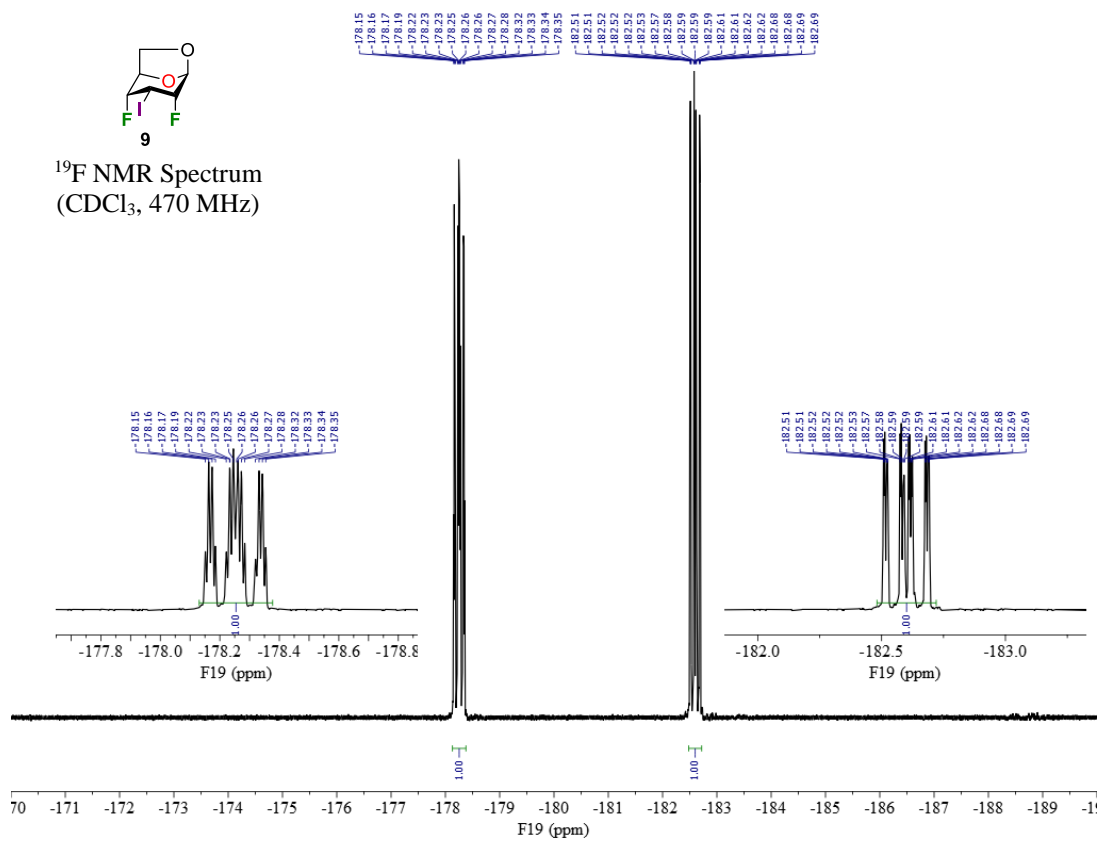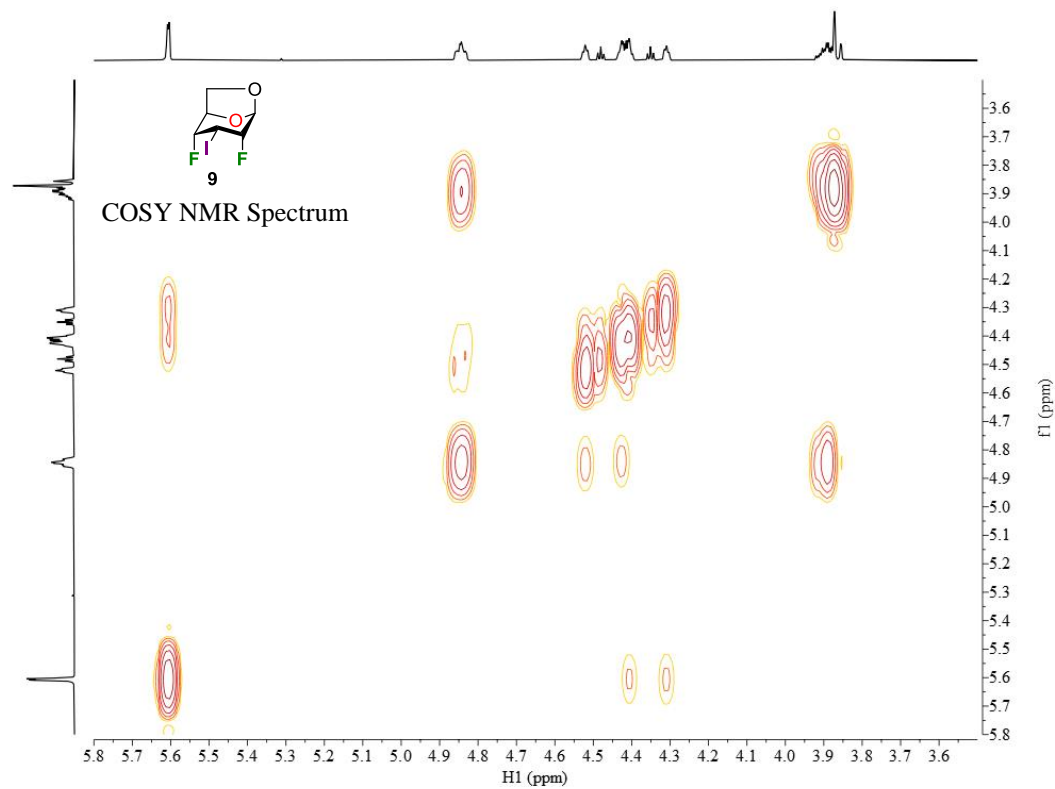

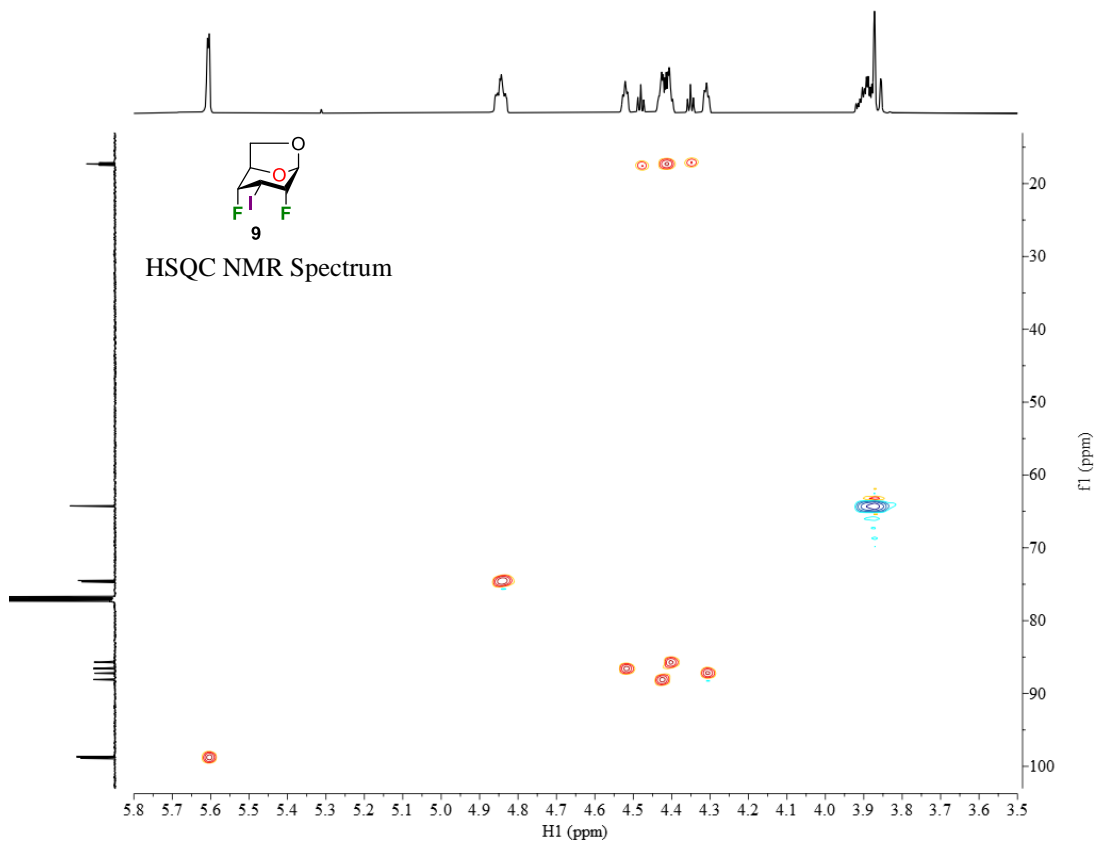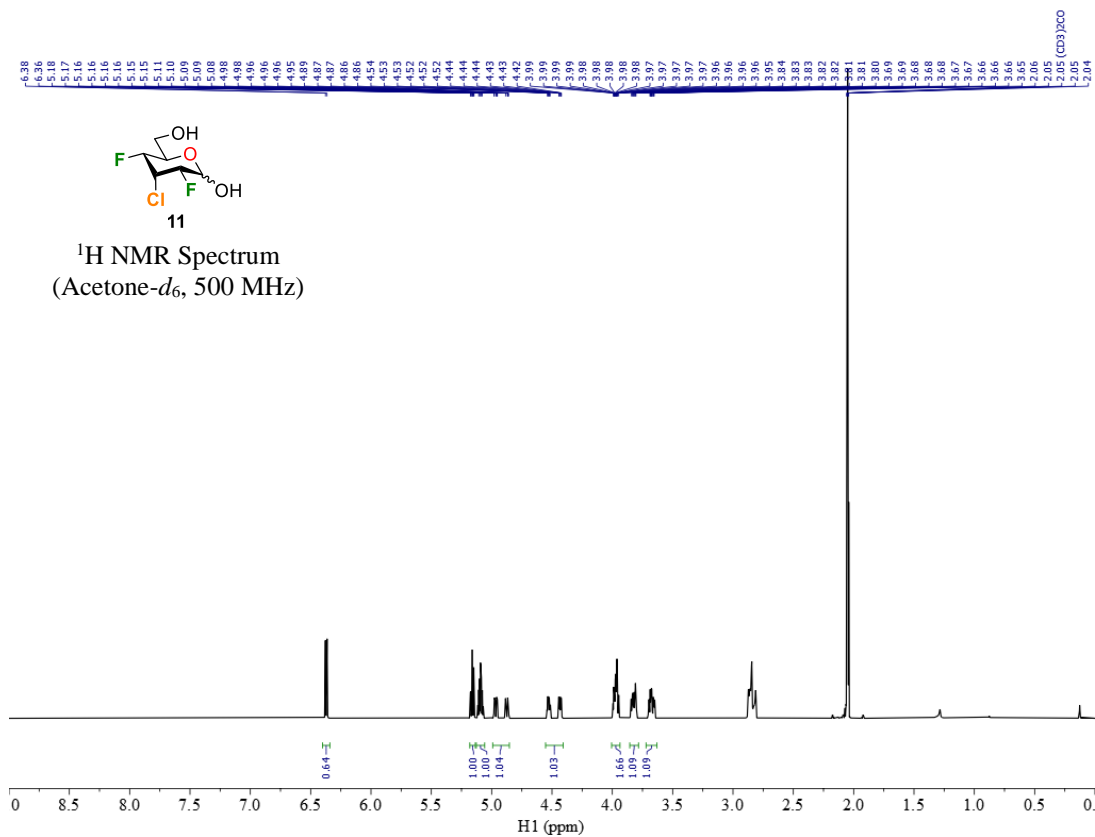

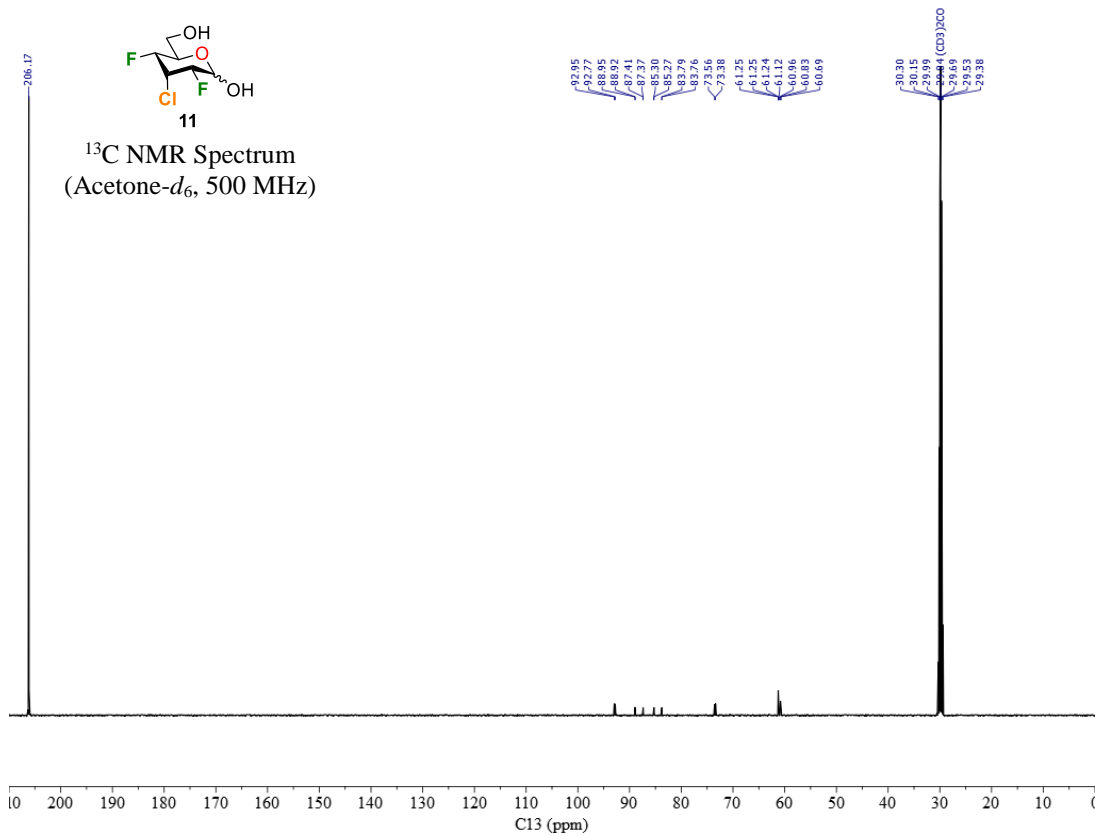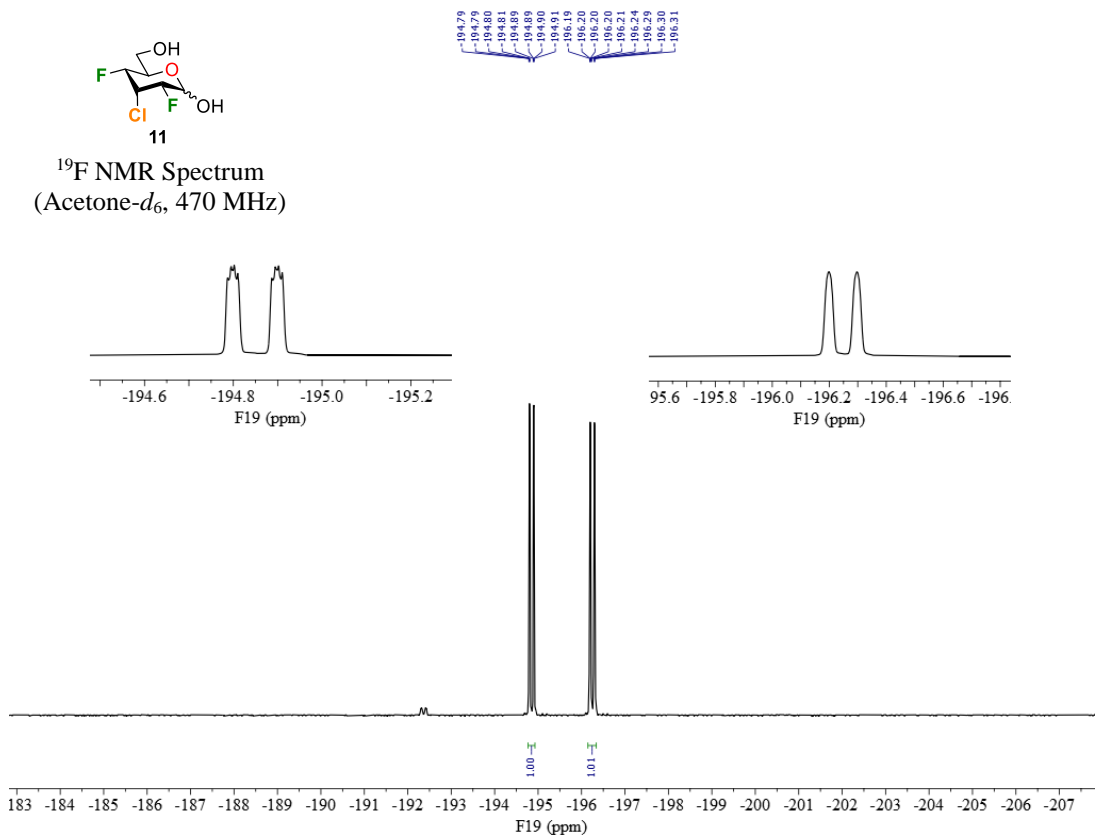

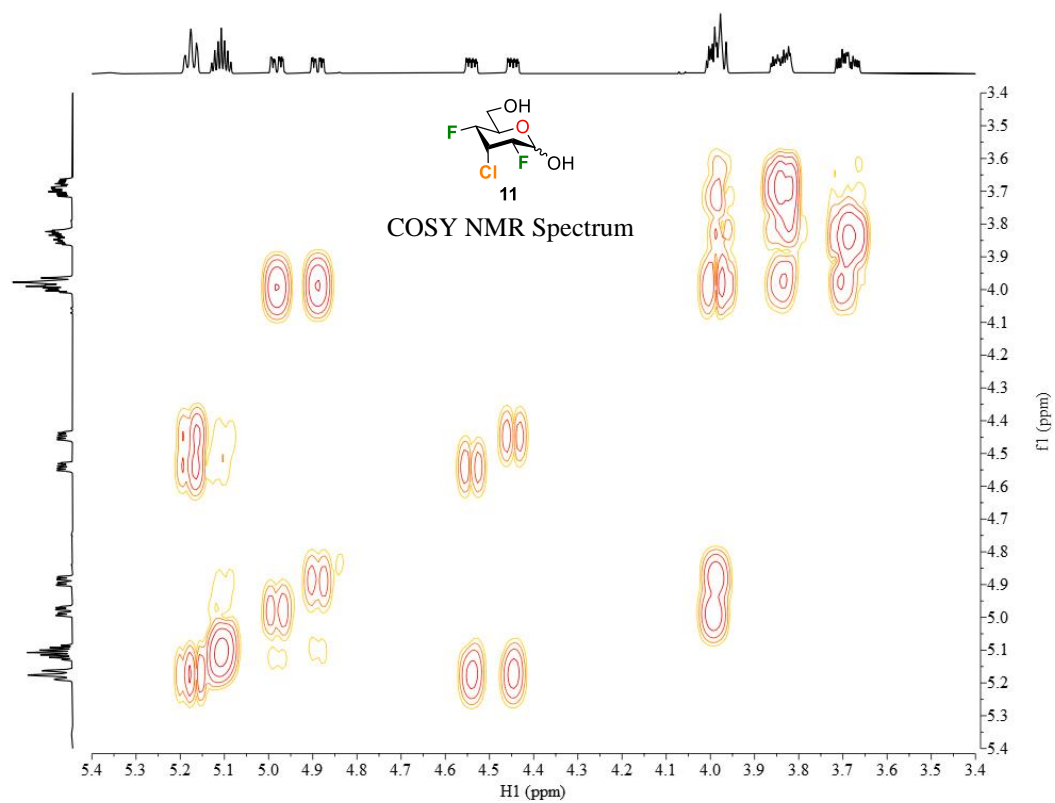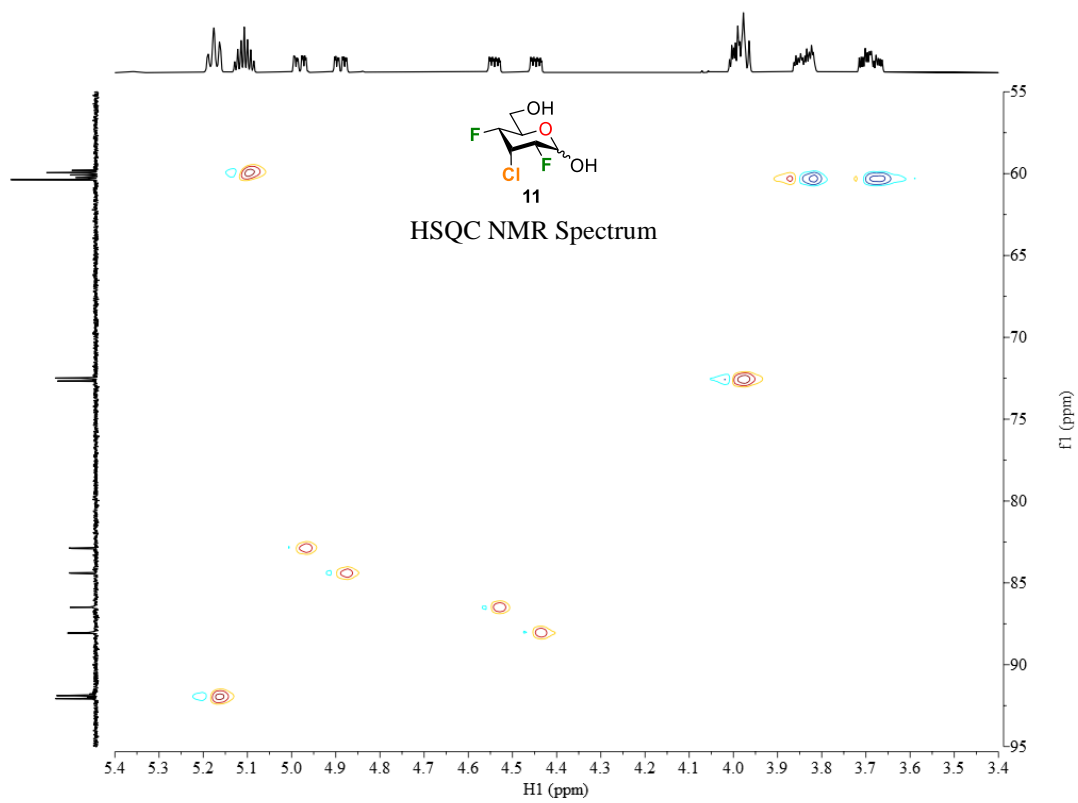



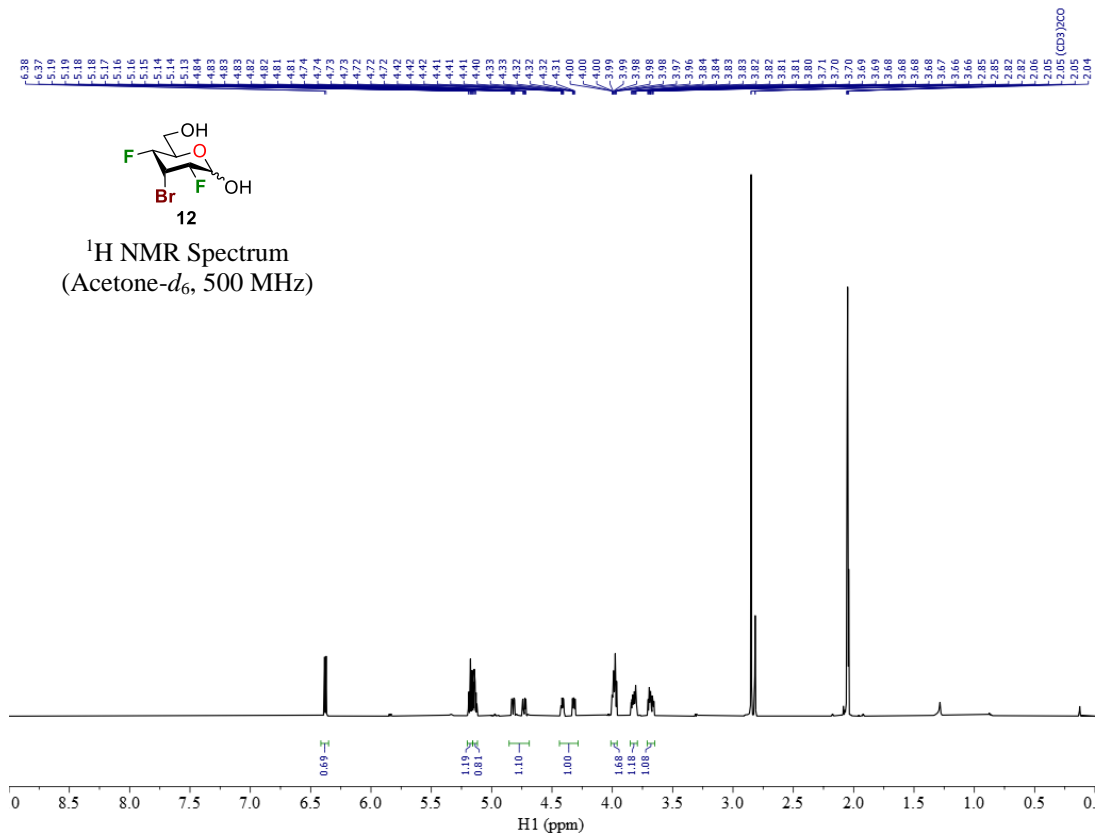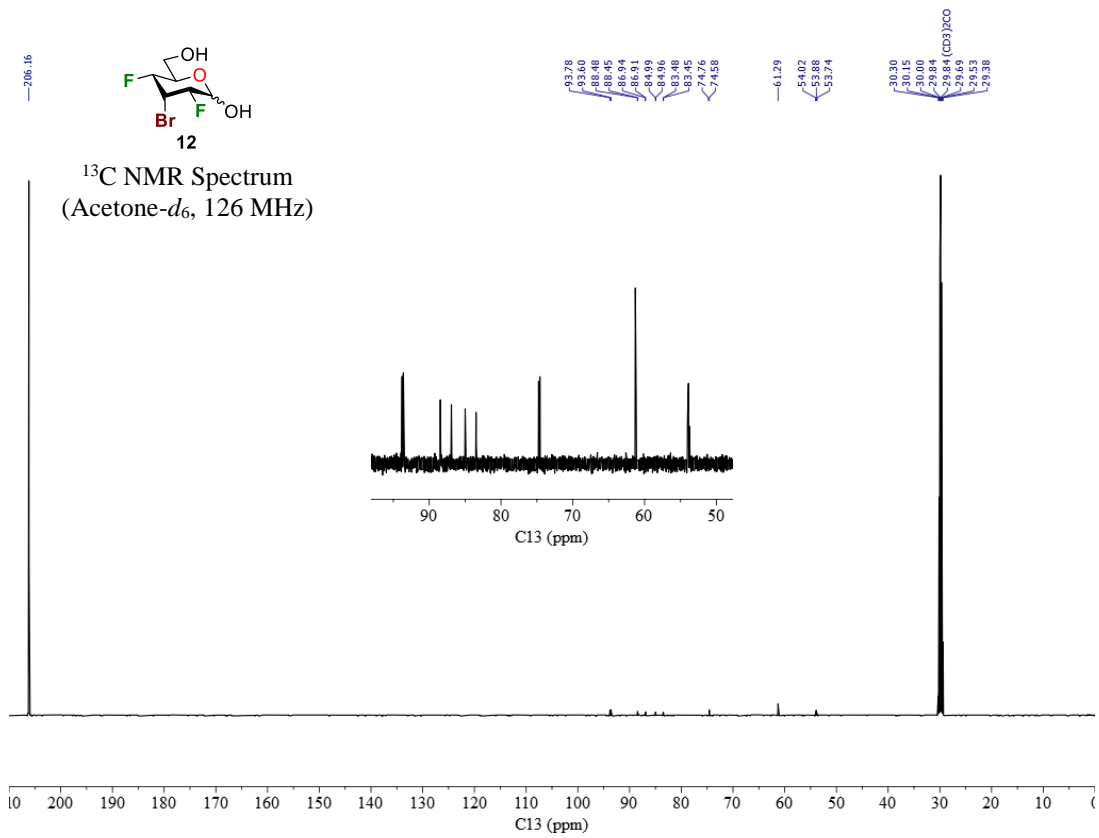

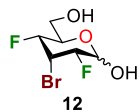

<sup>19</sup>F NMR Spectrum  
(Acetone-*d*<sub>6</sub>, 470 MHz)

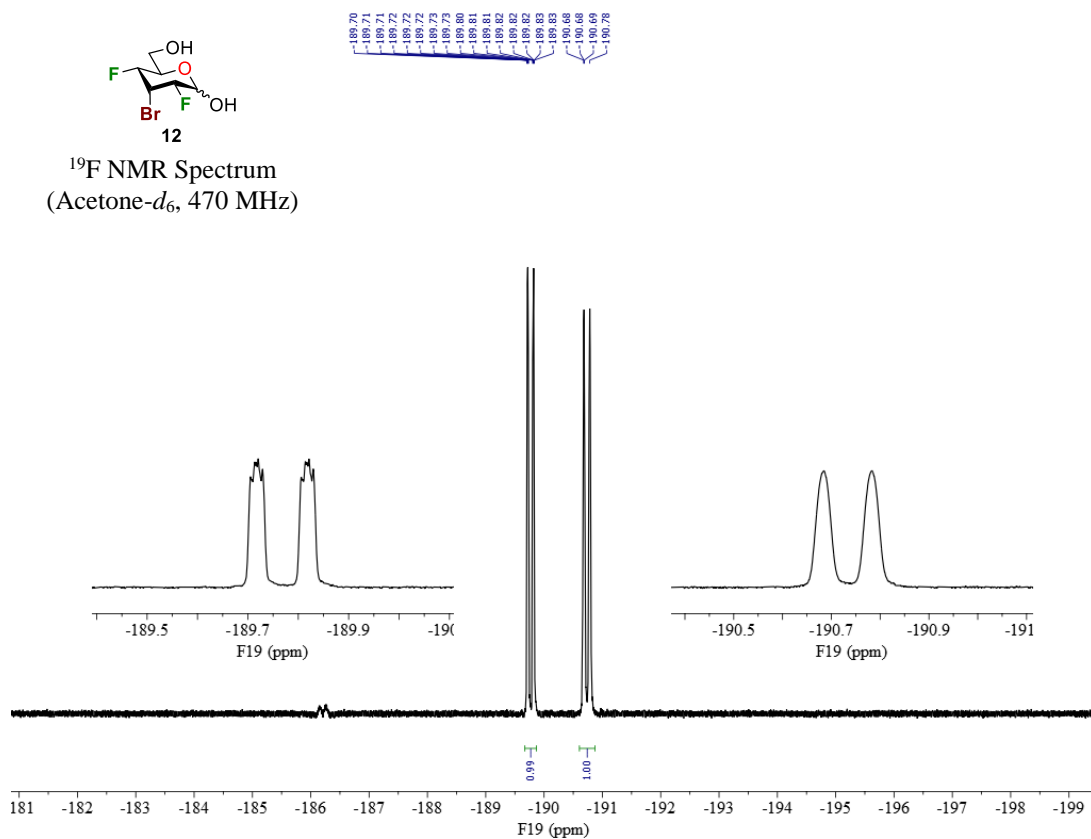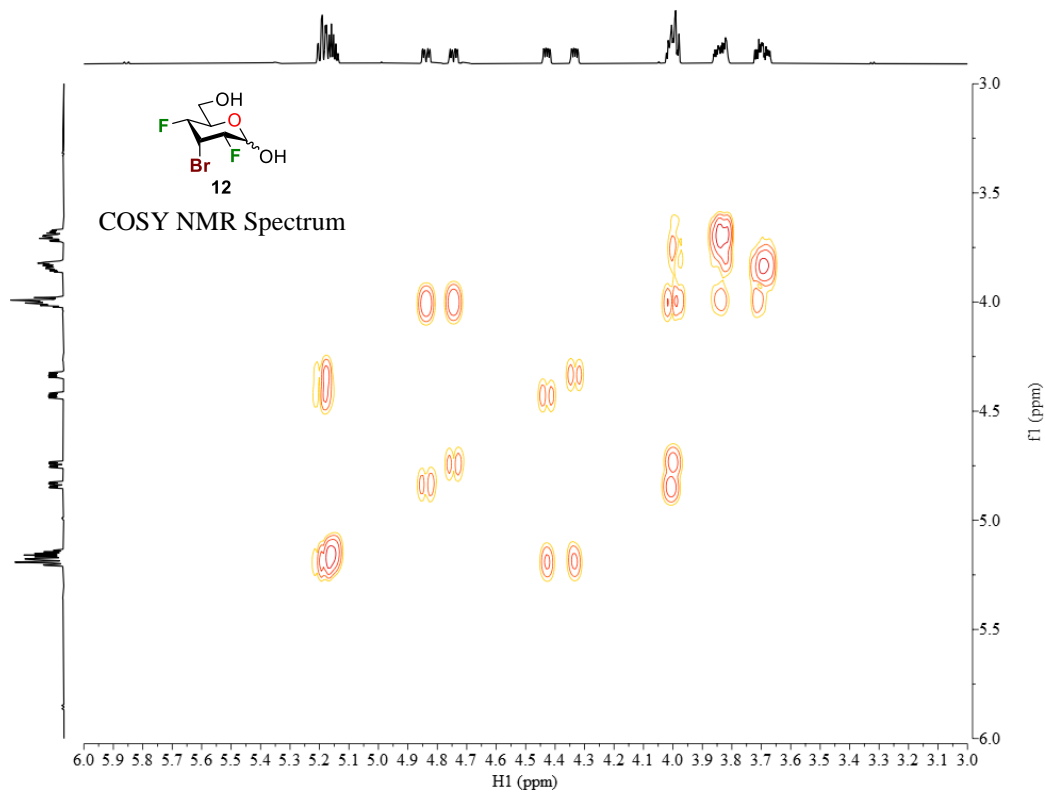



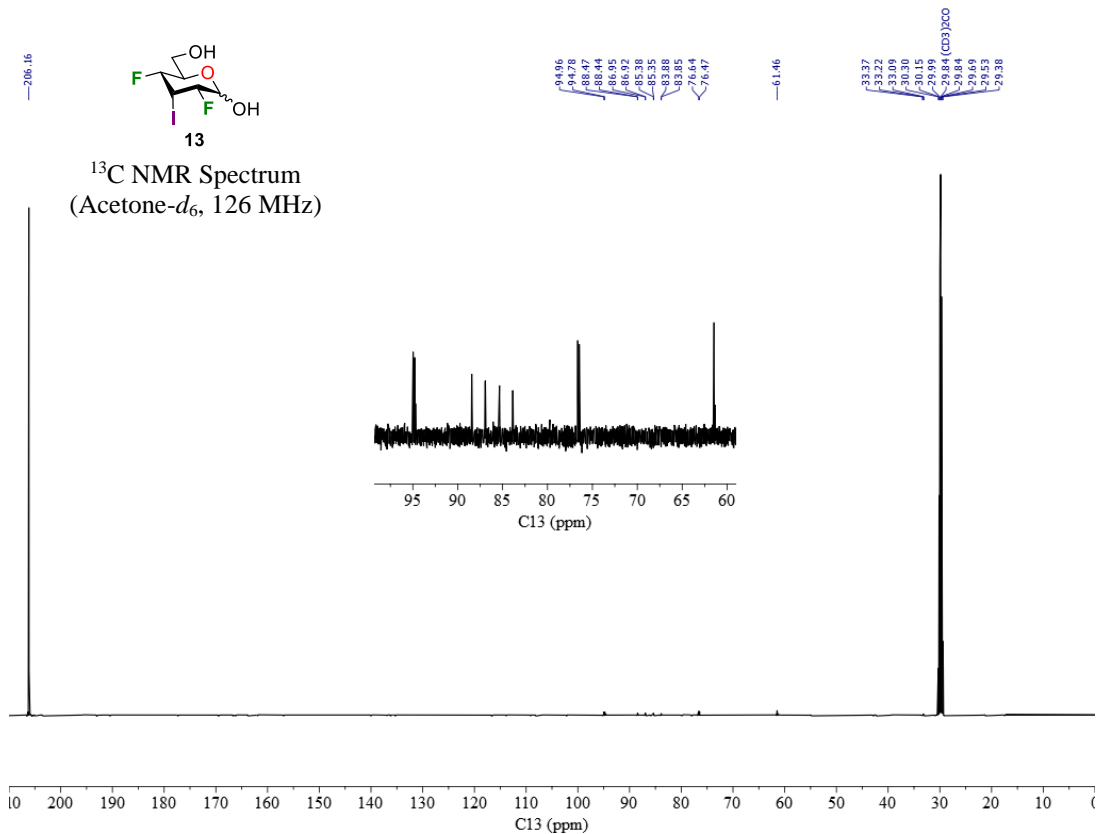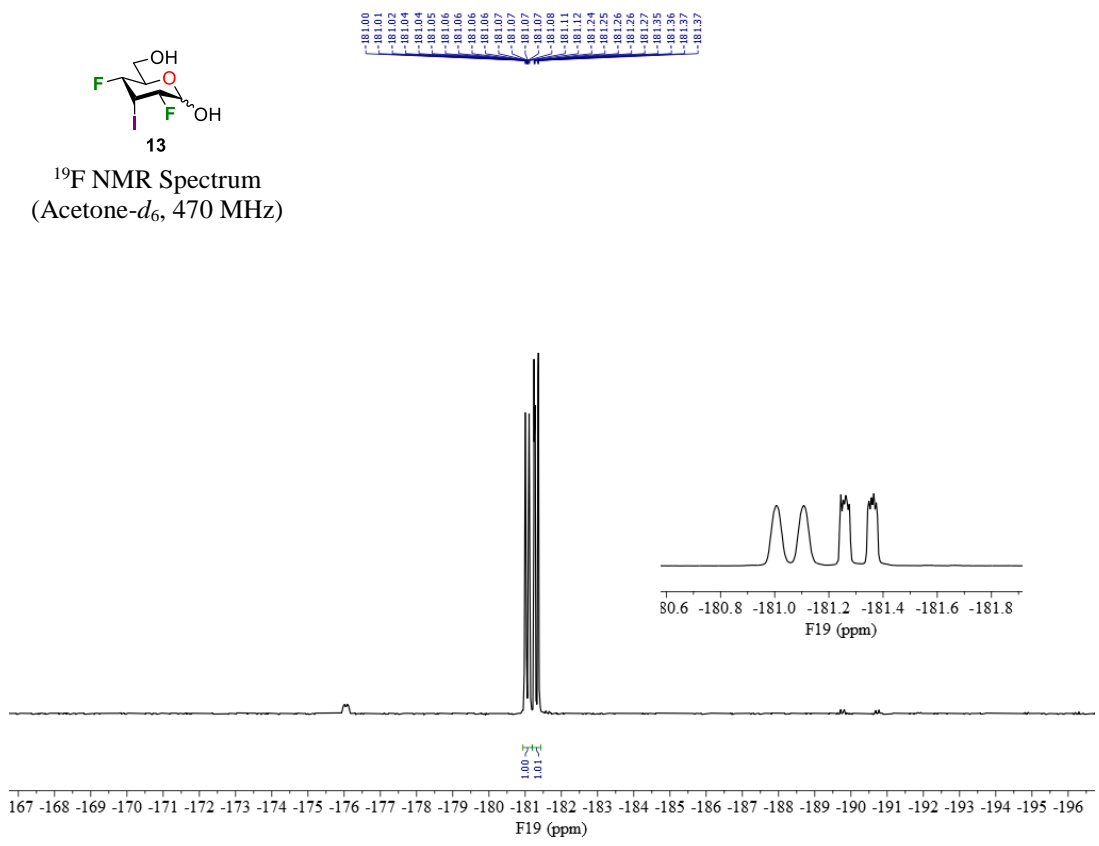

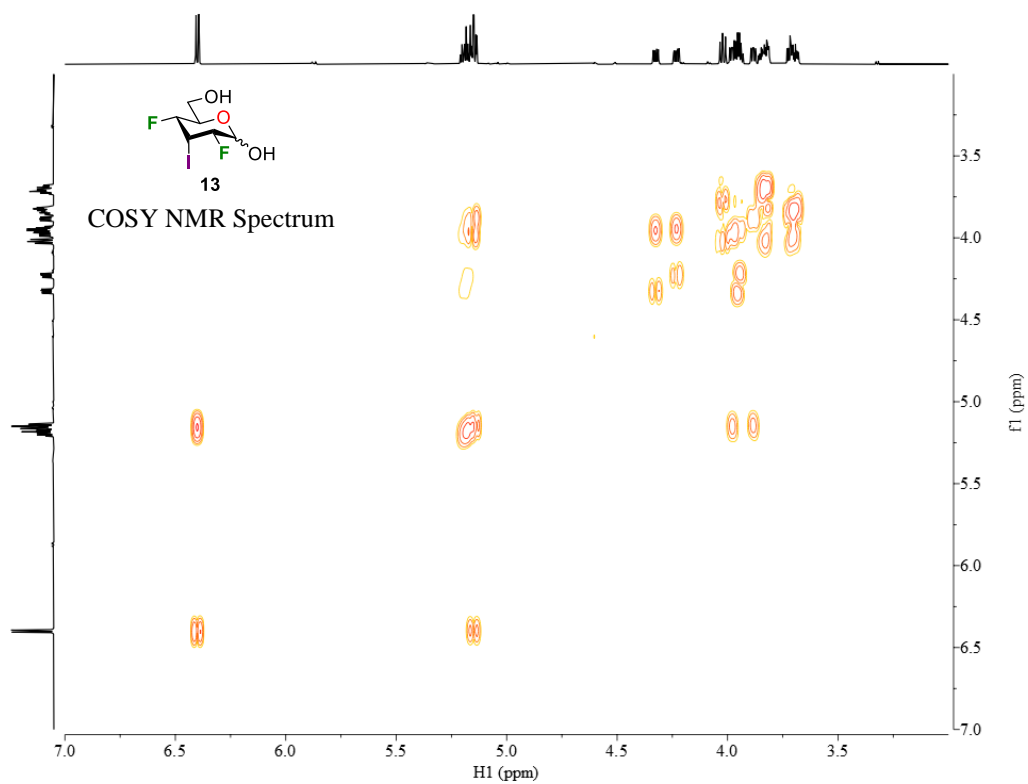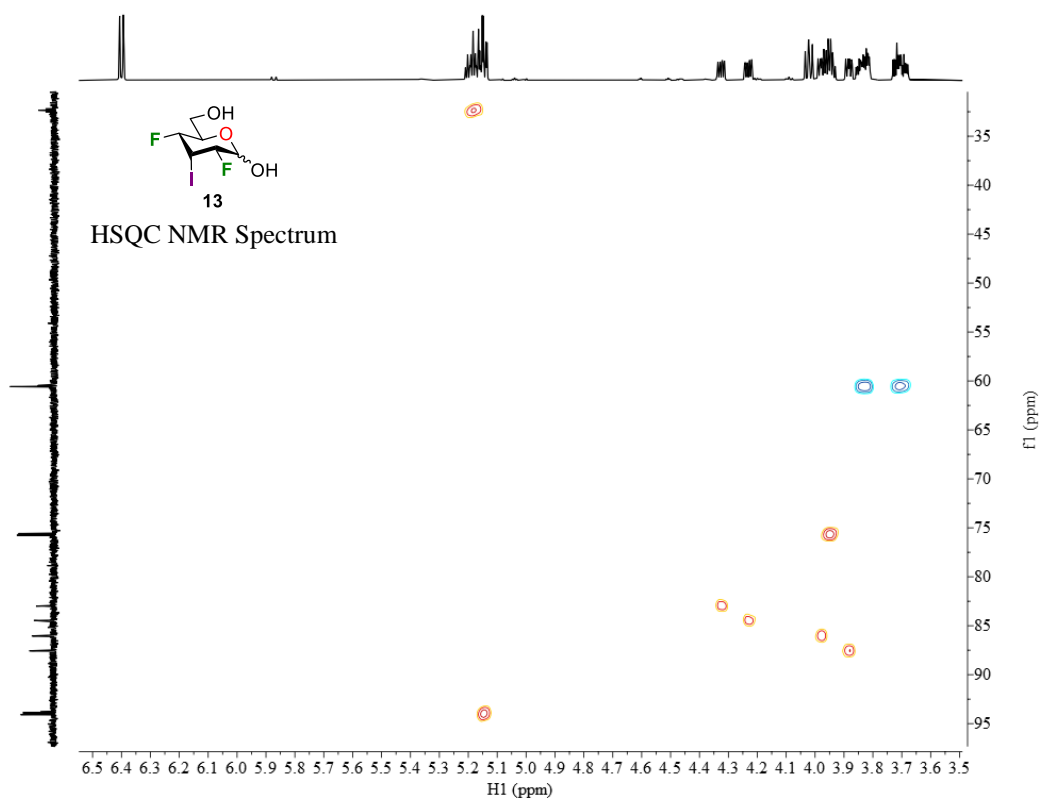

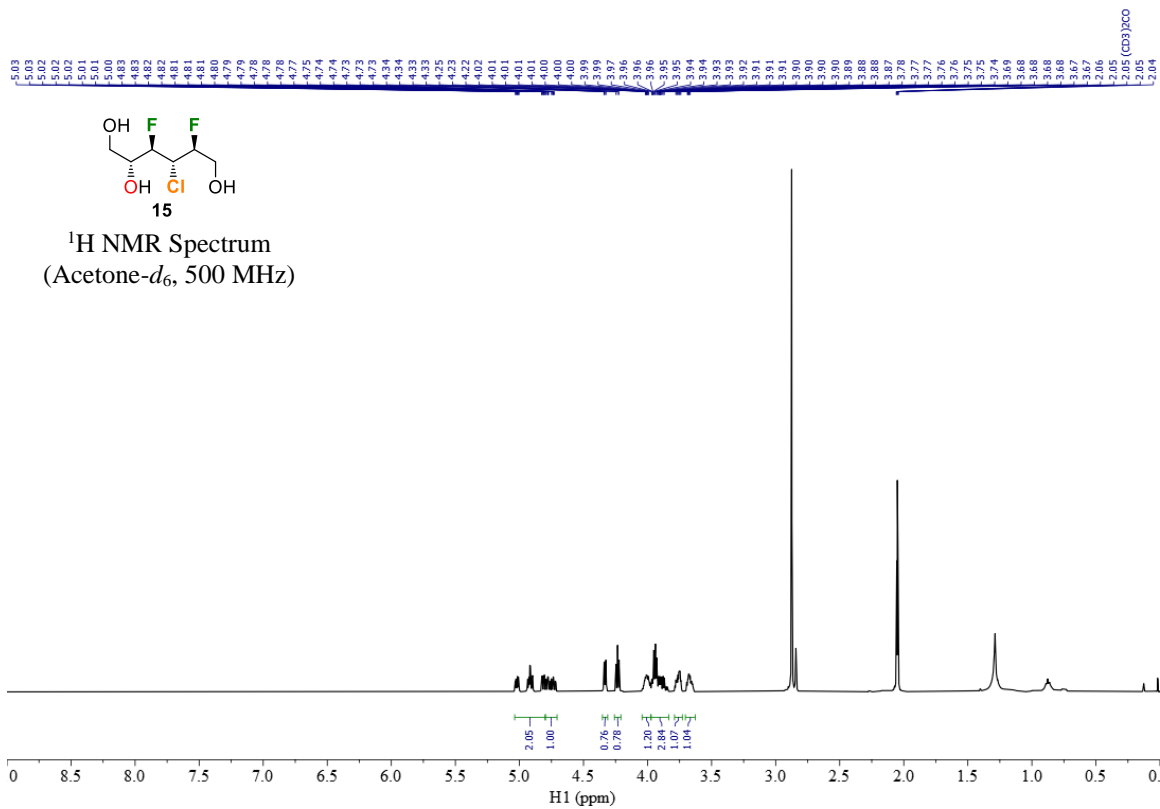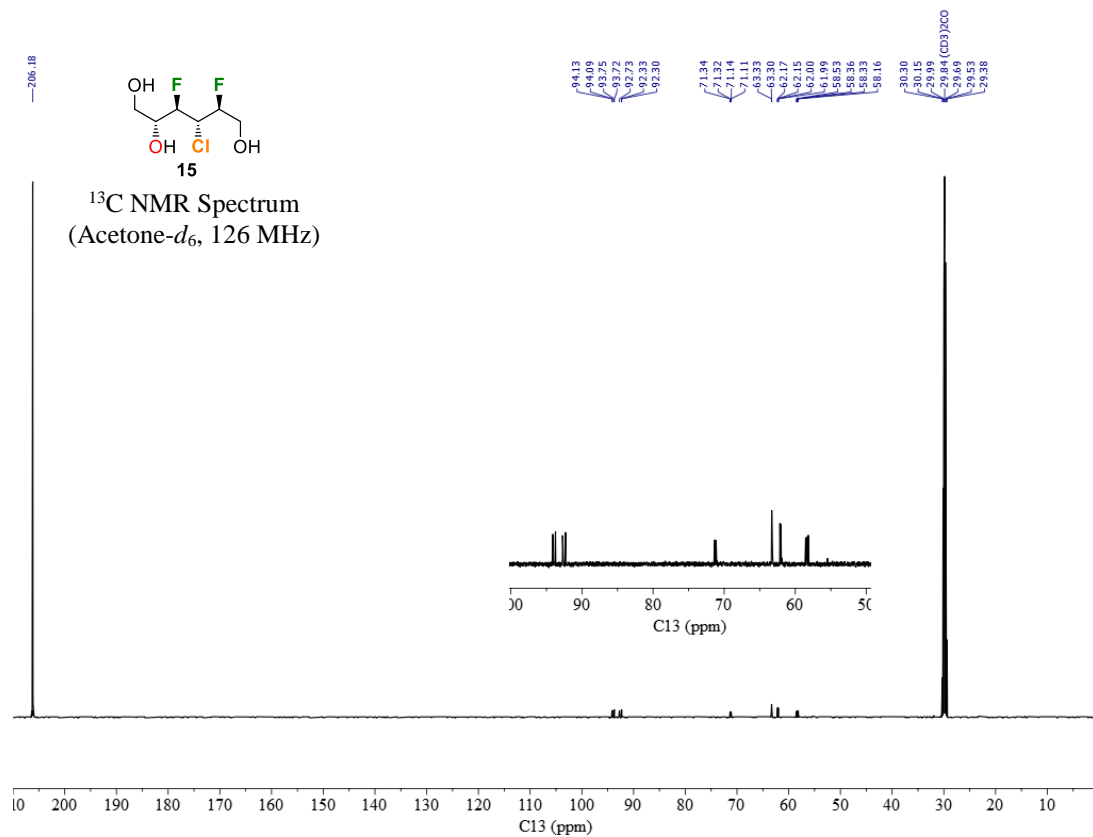







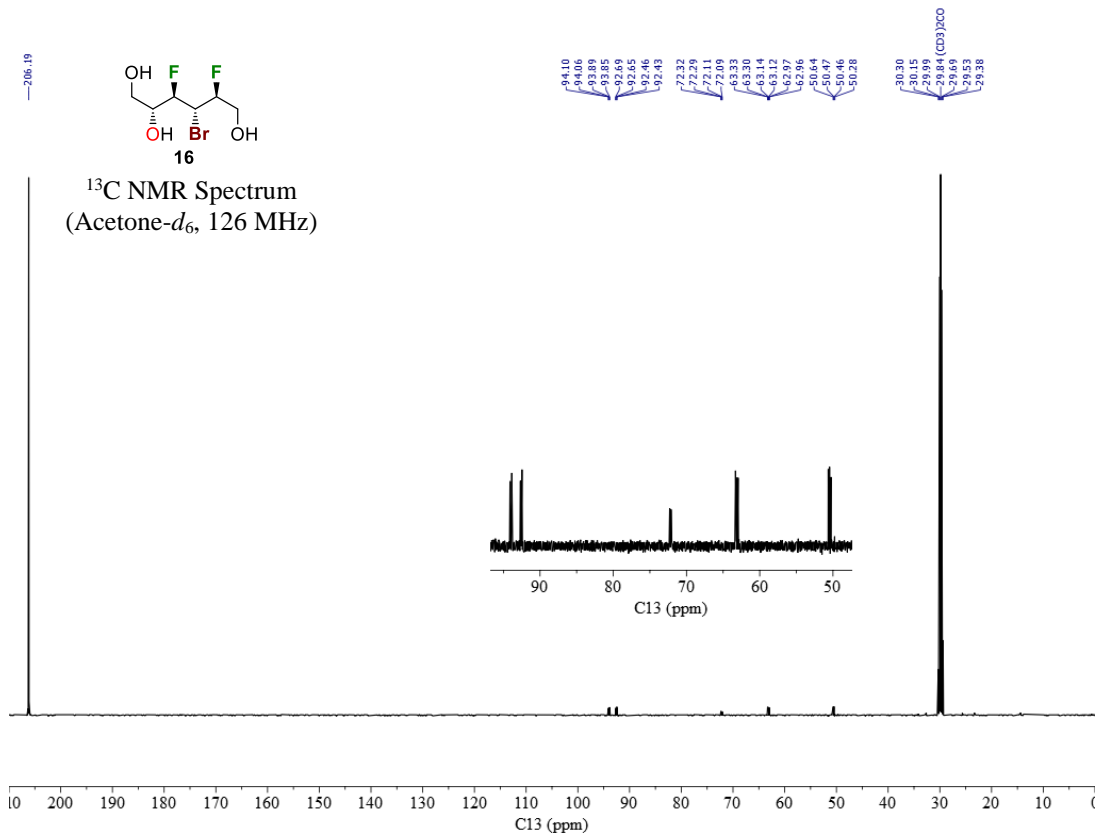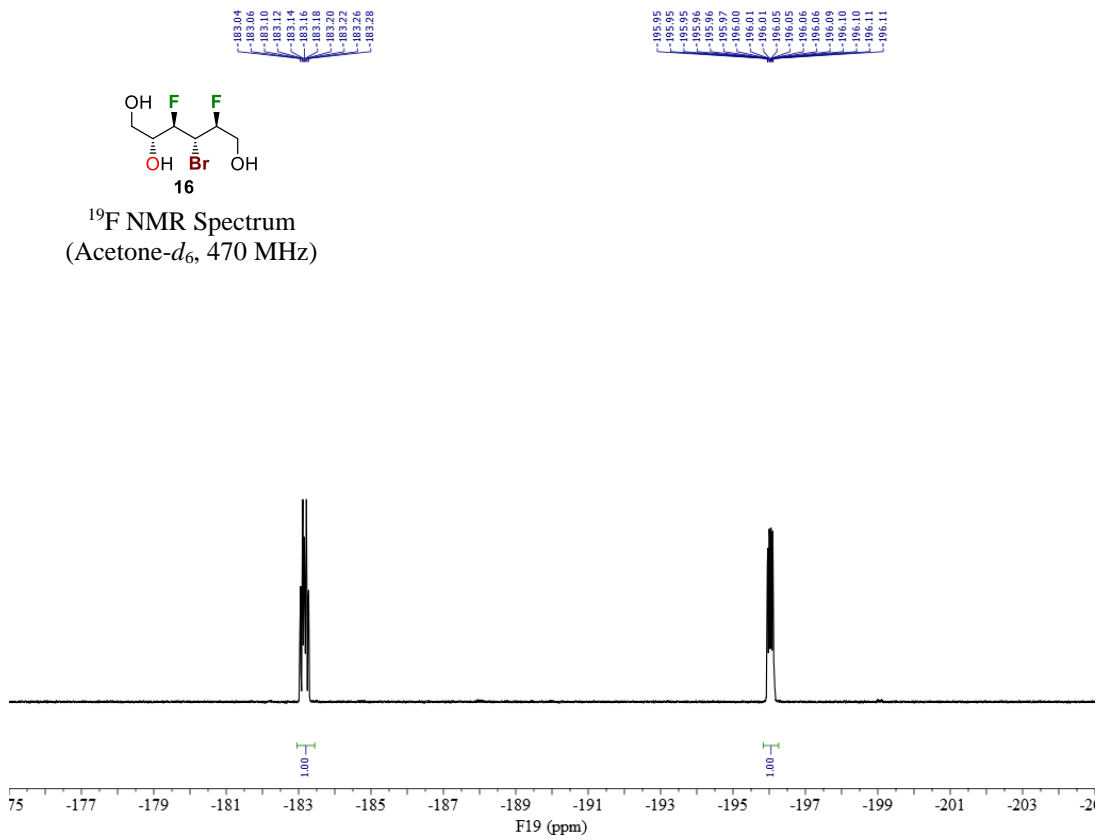

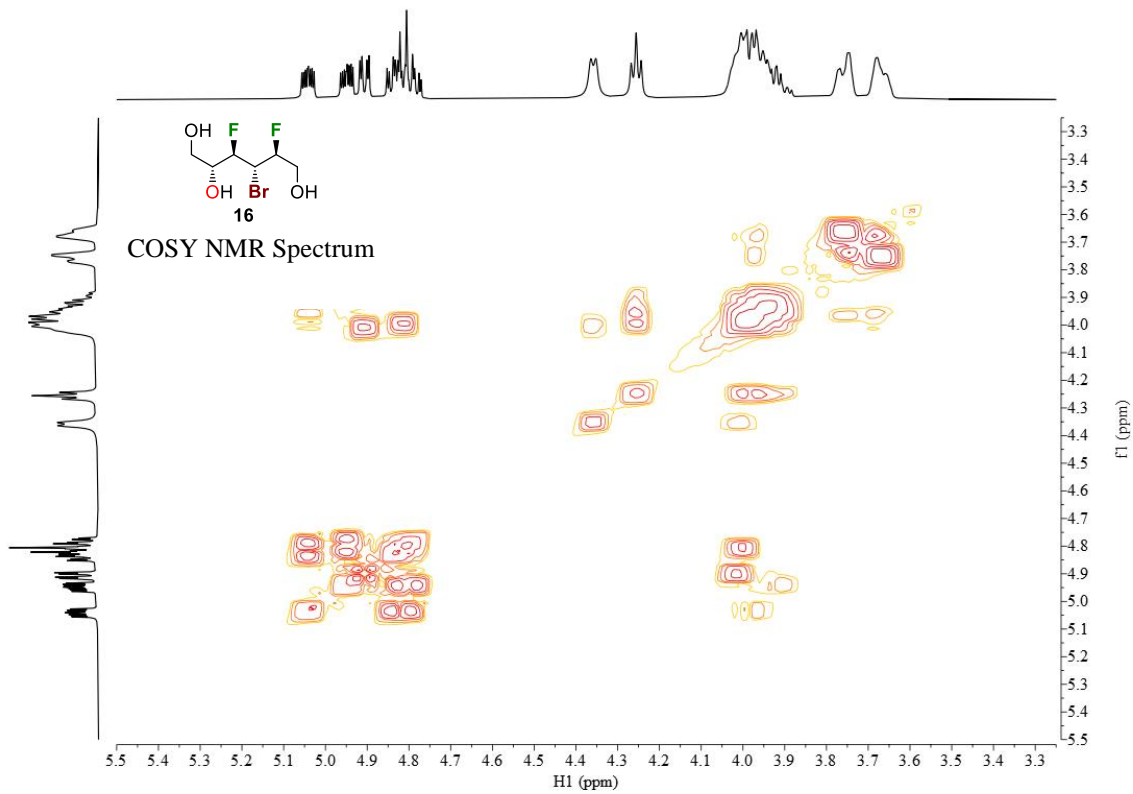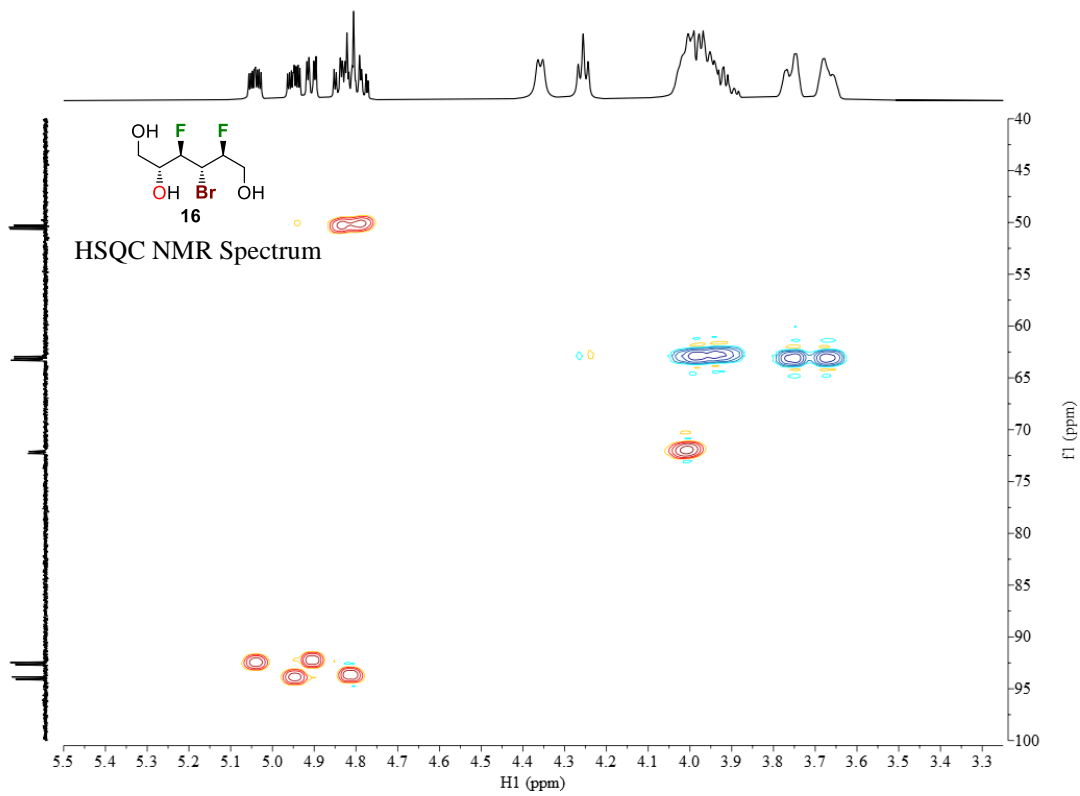

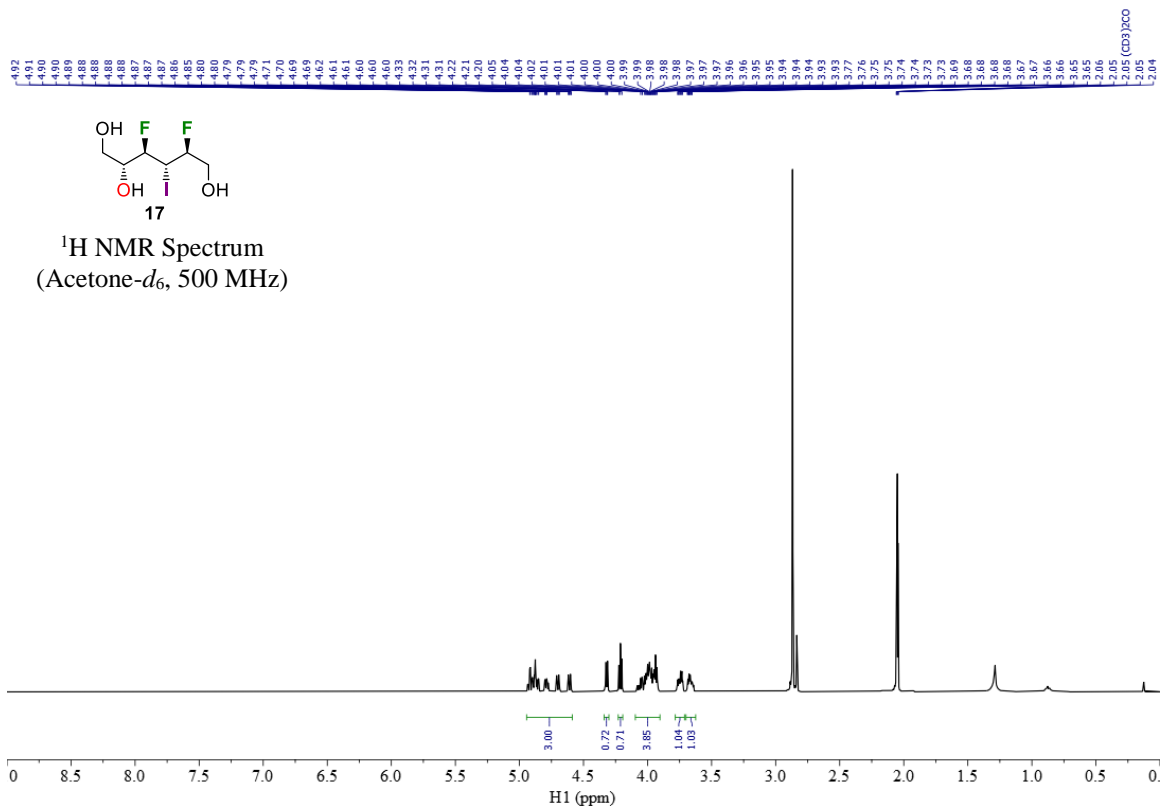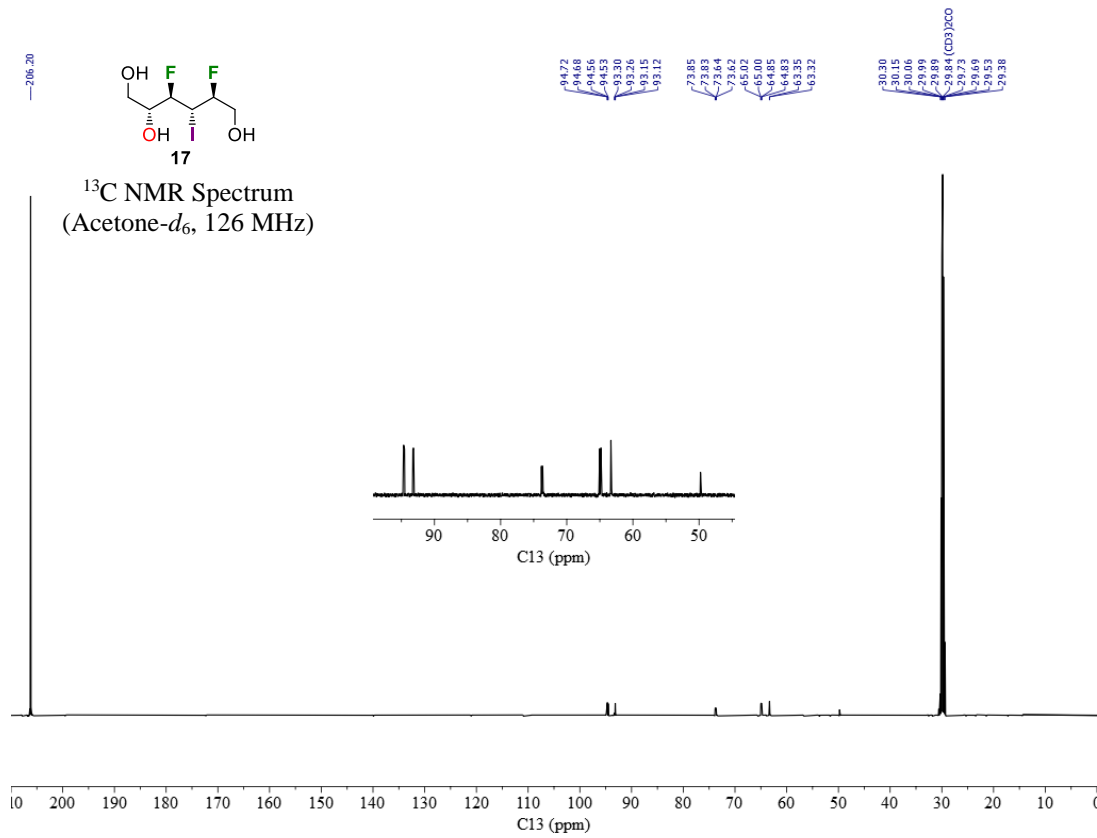

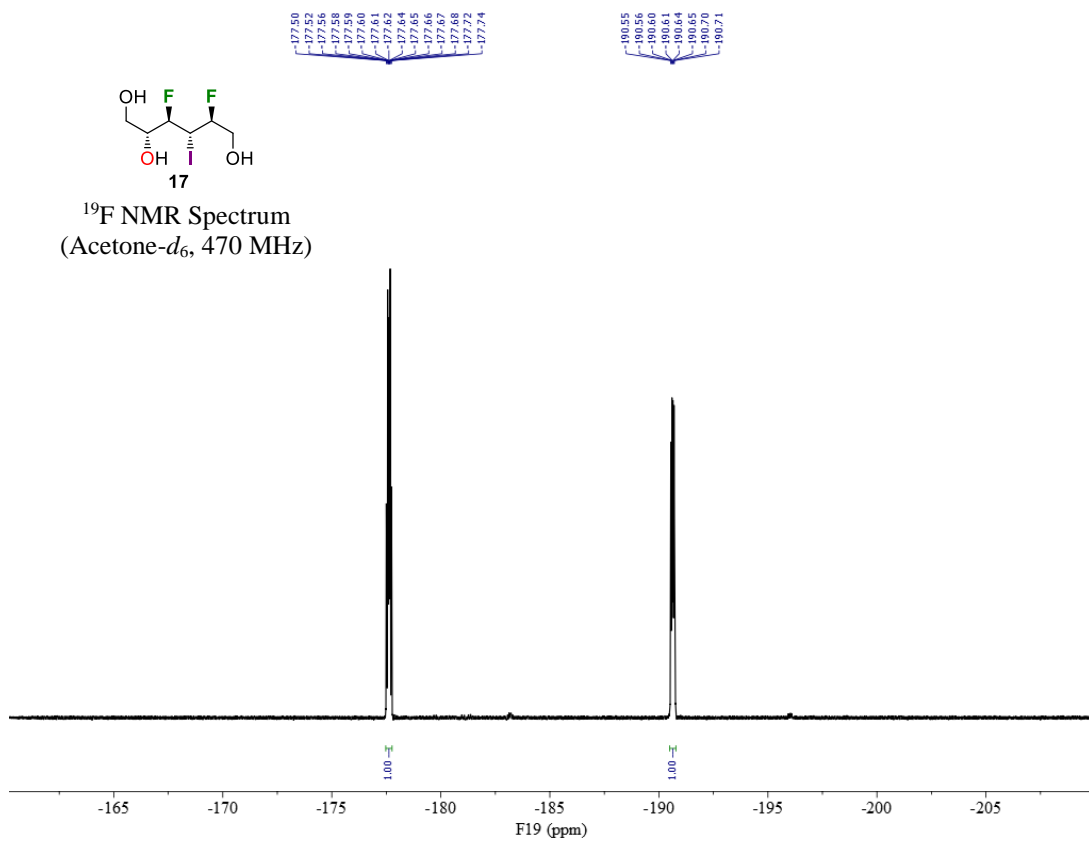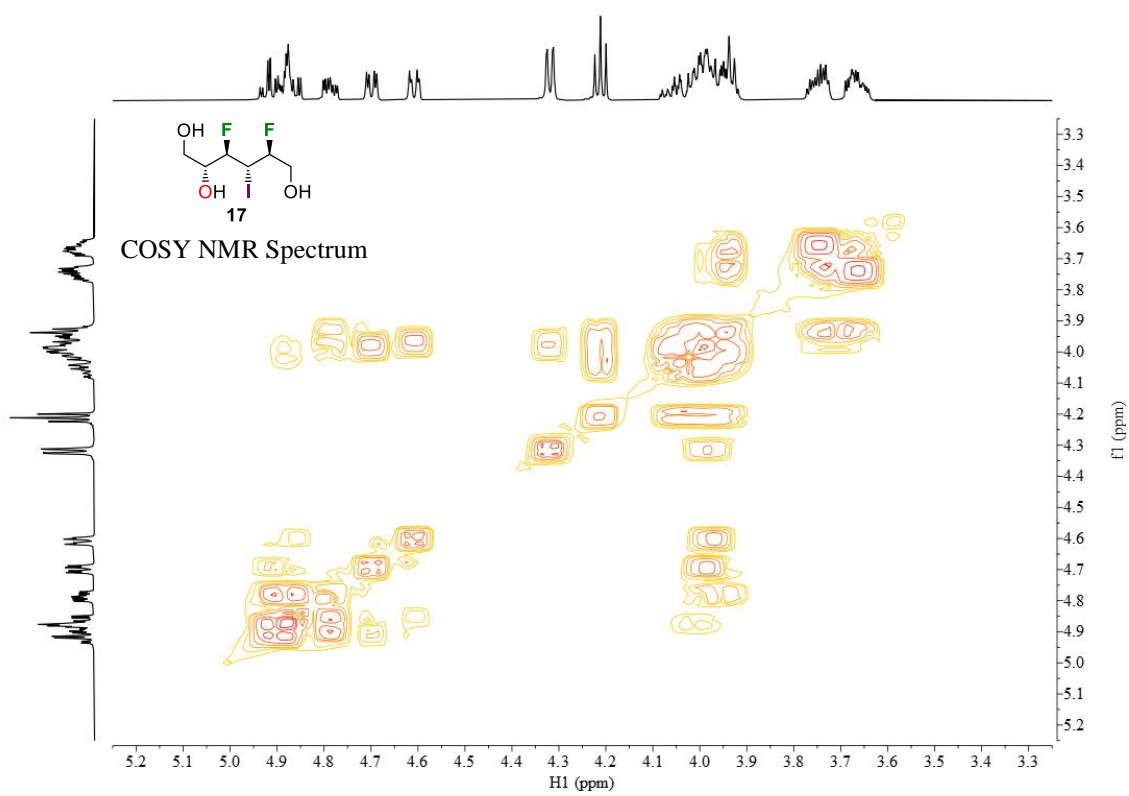

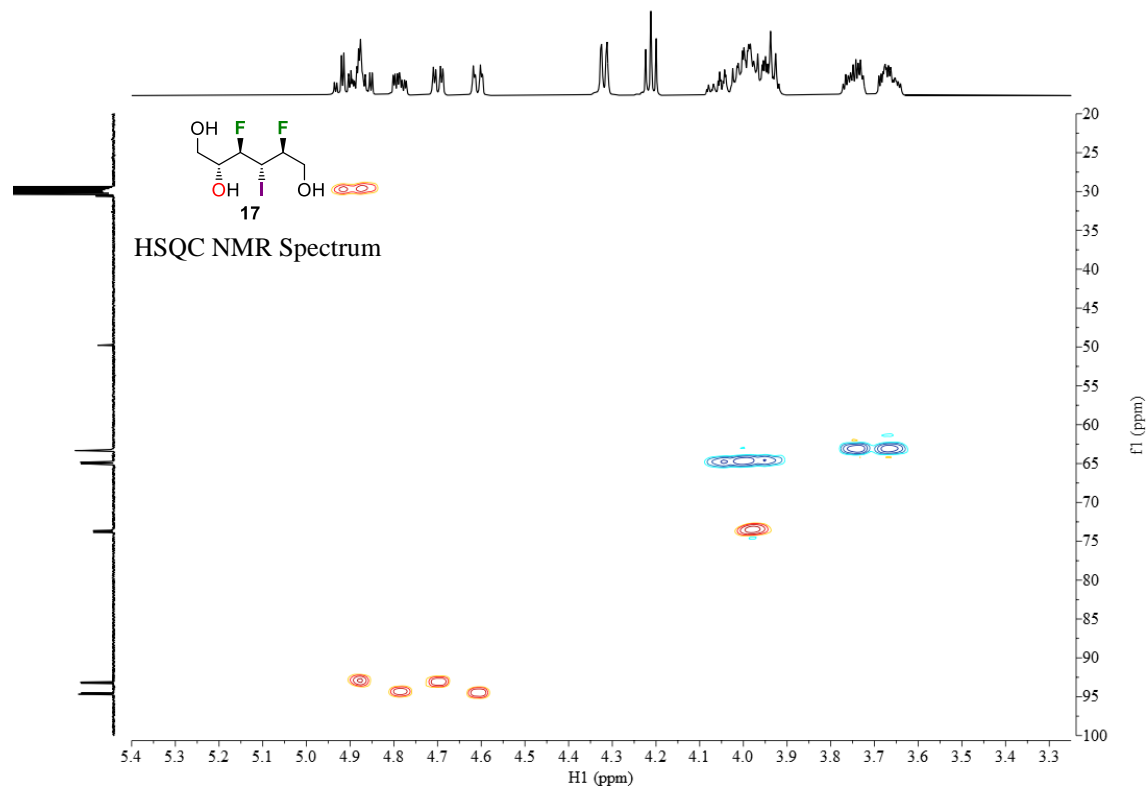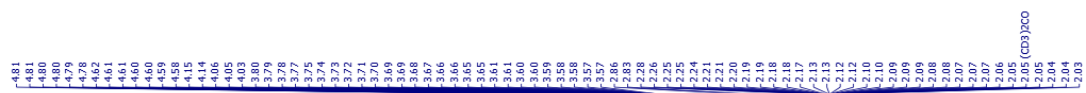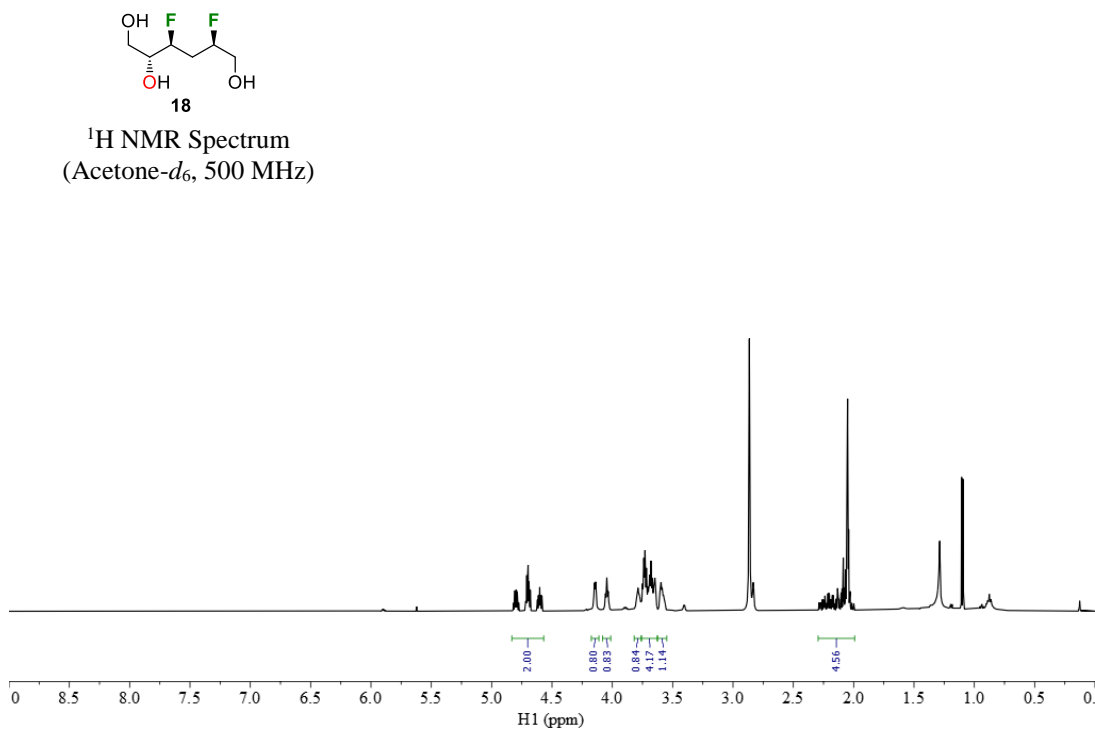

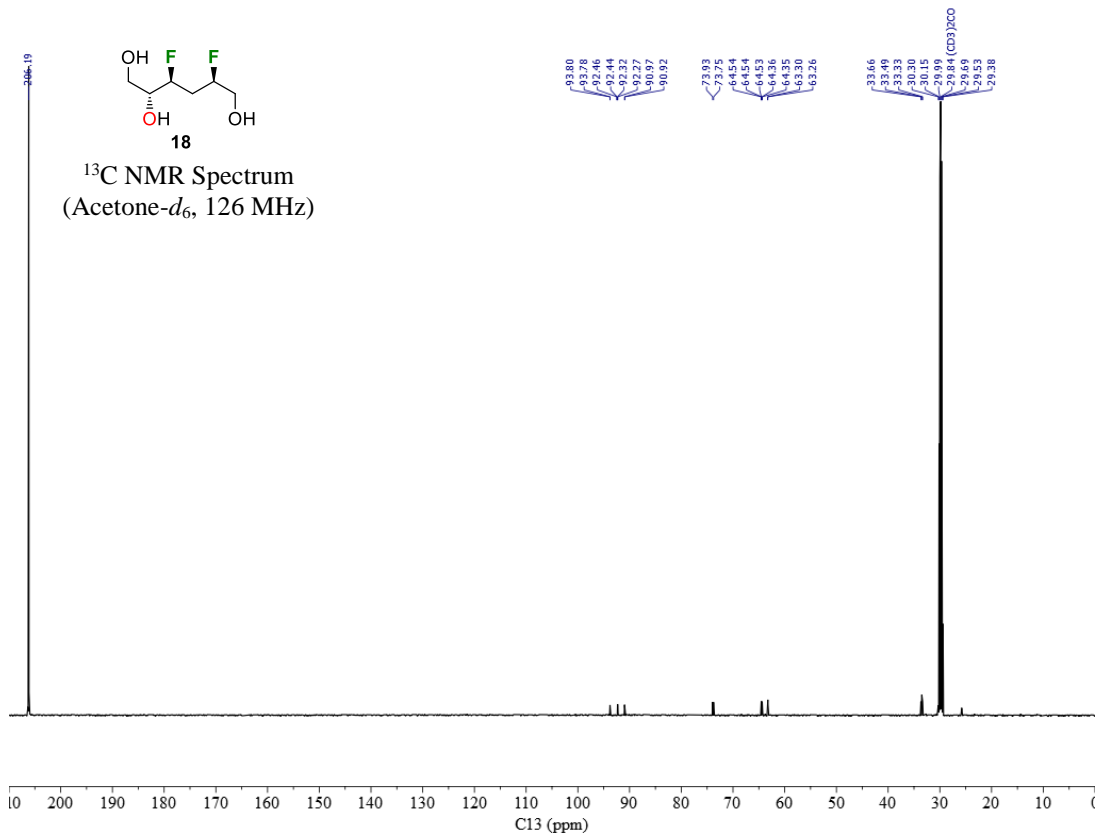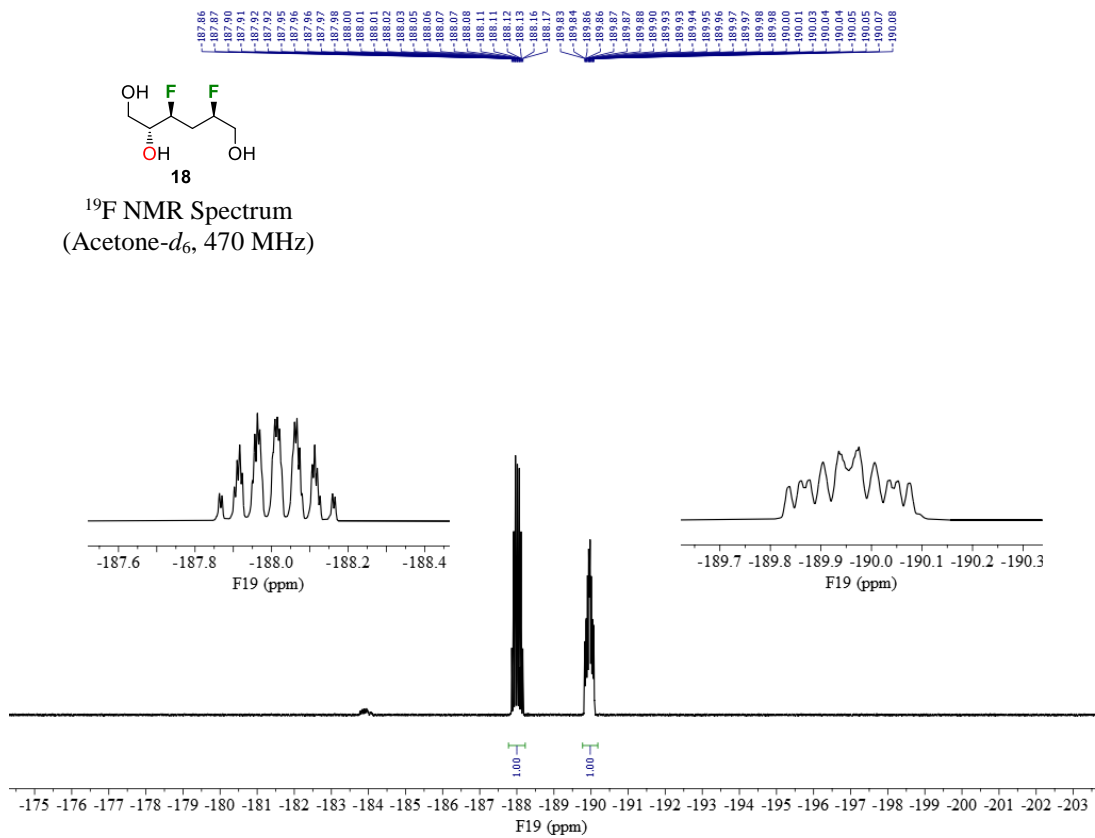

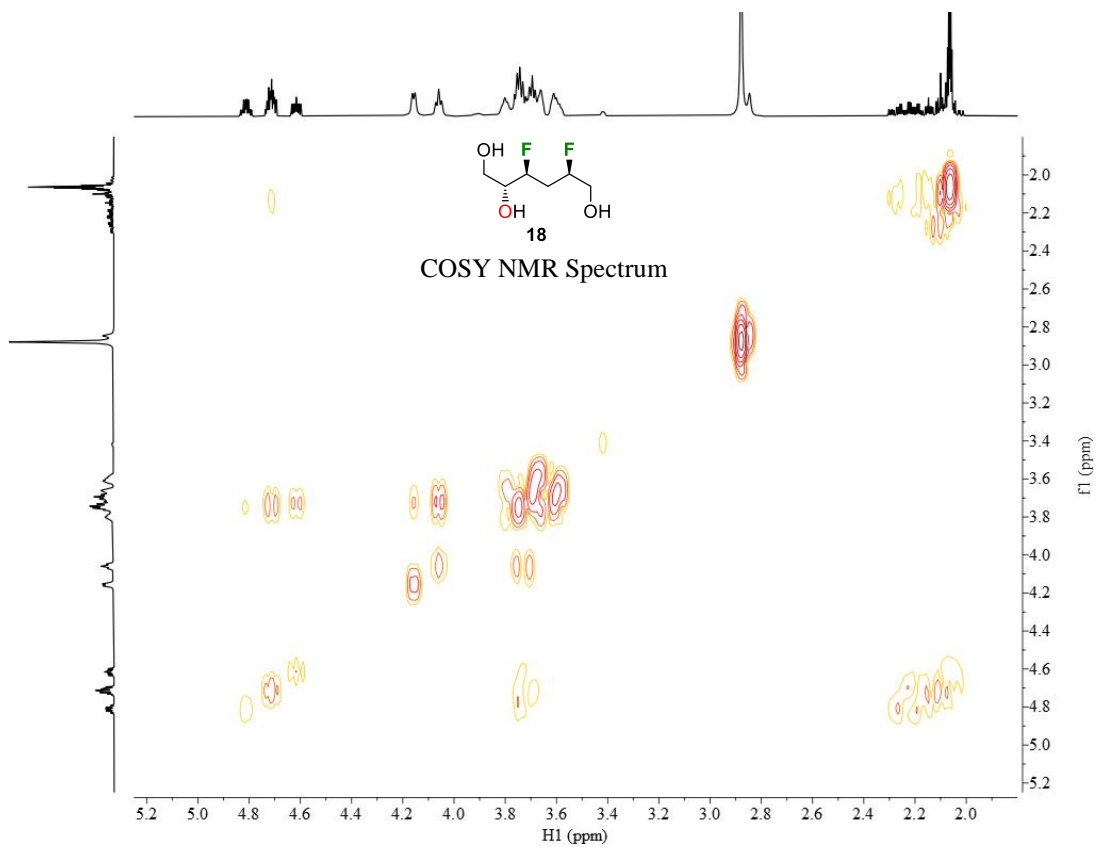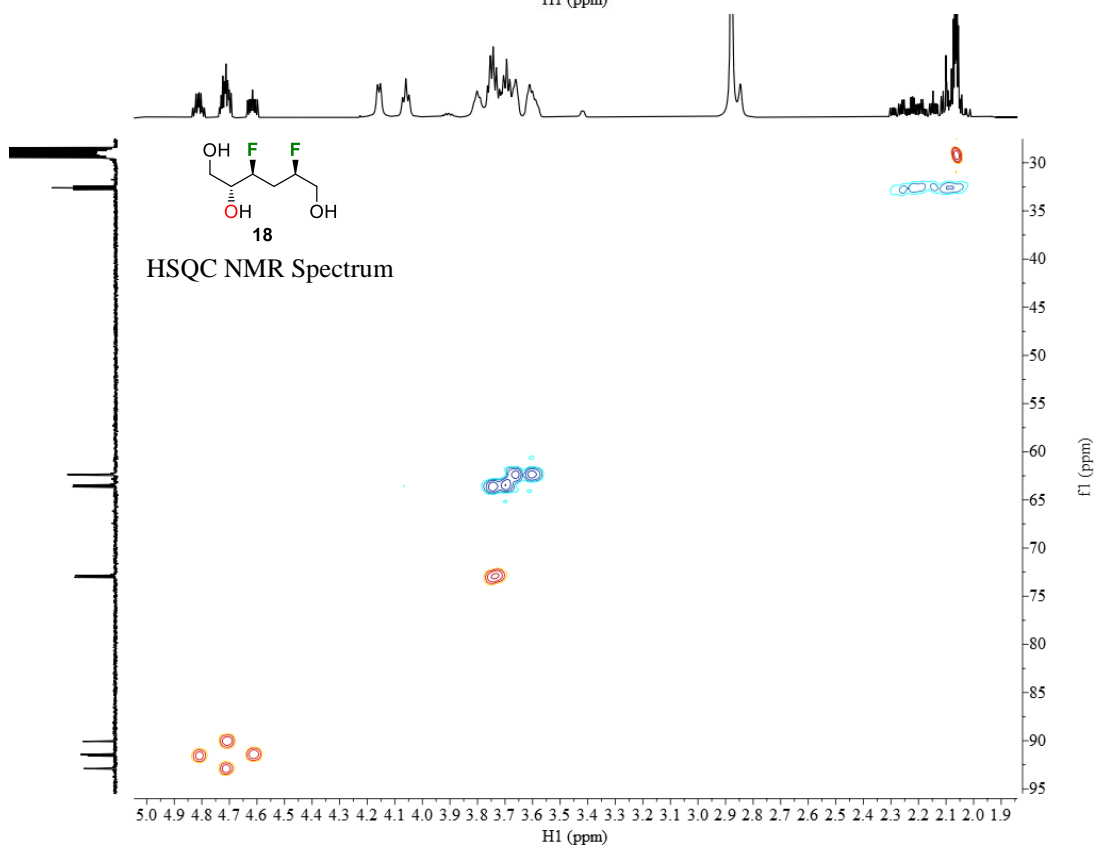





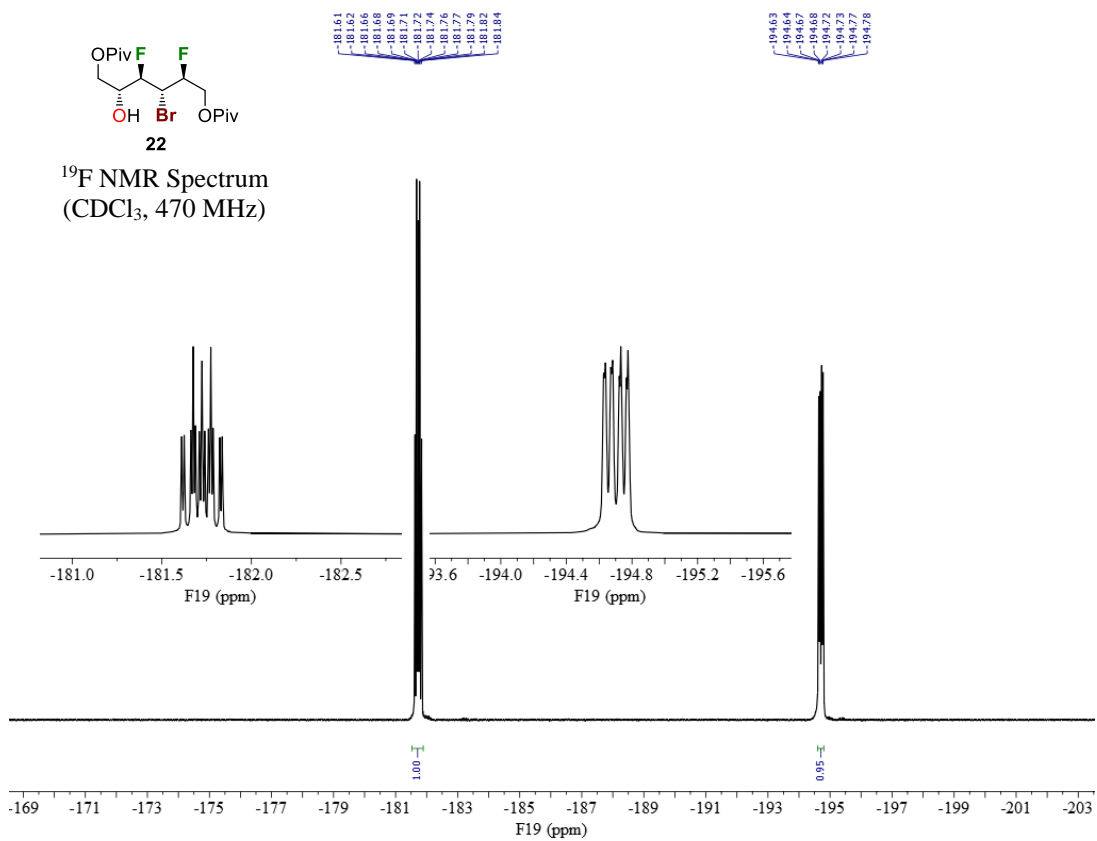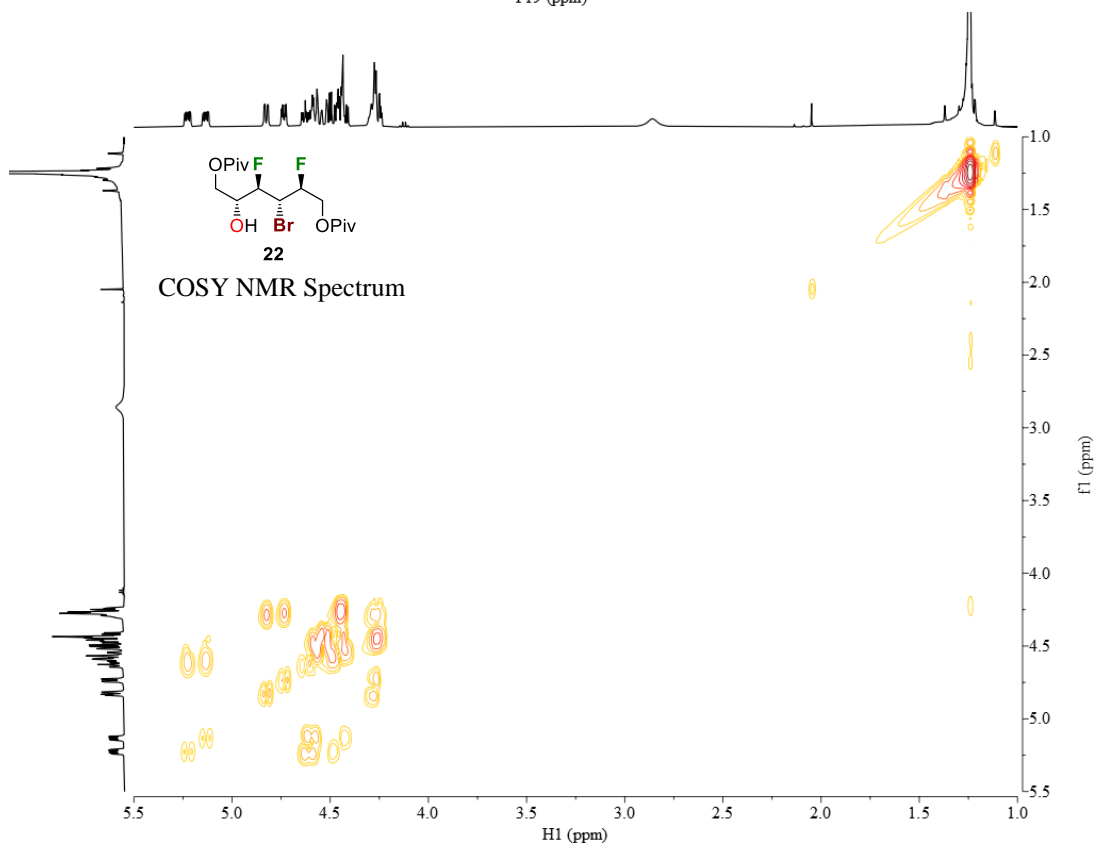

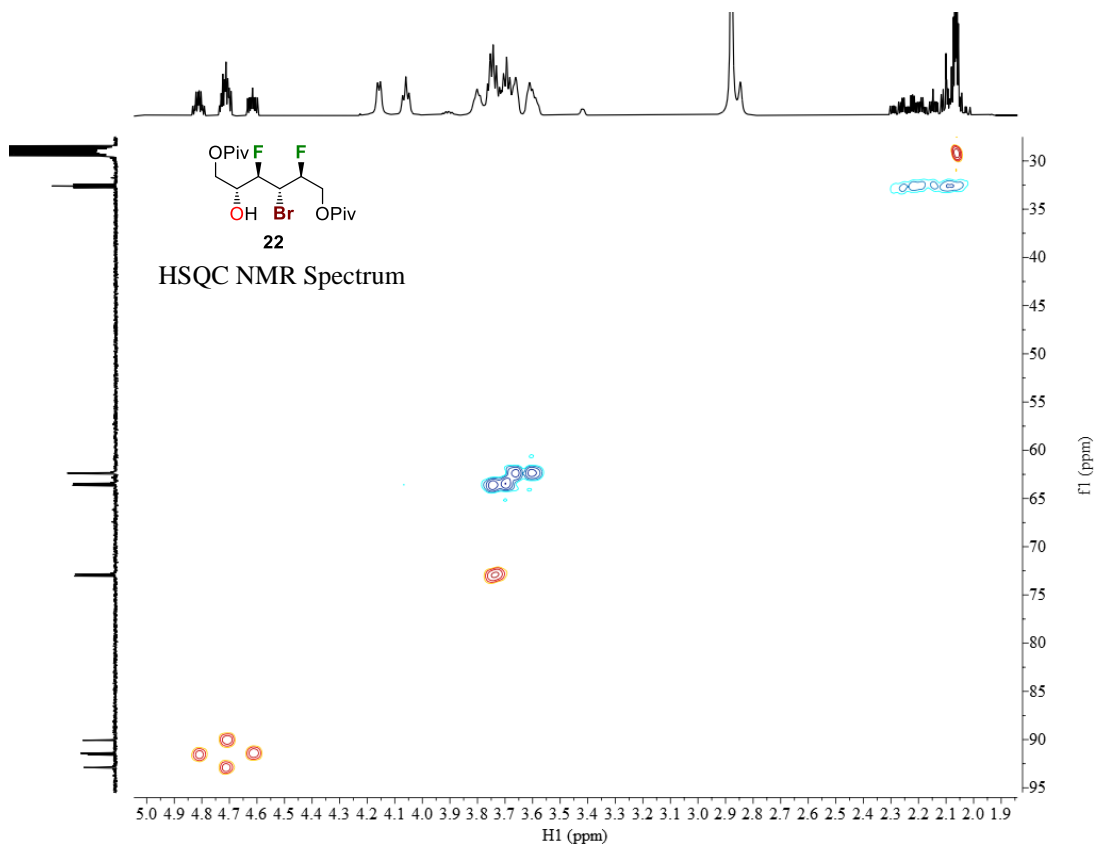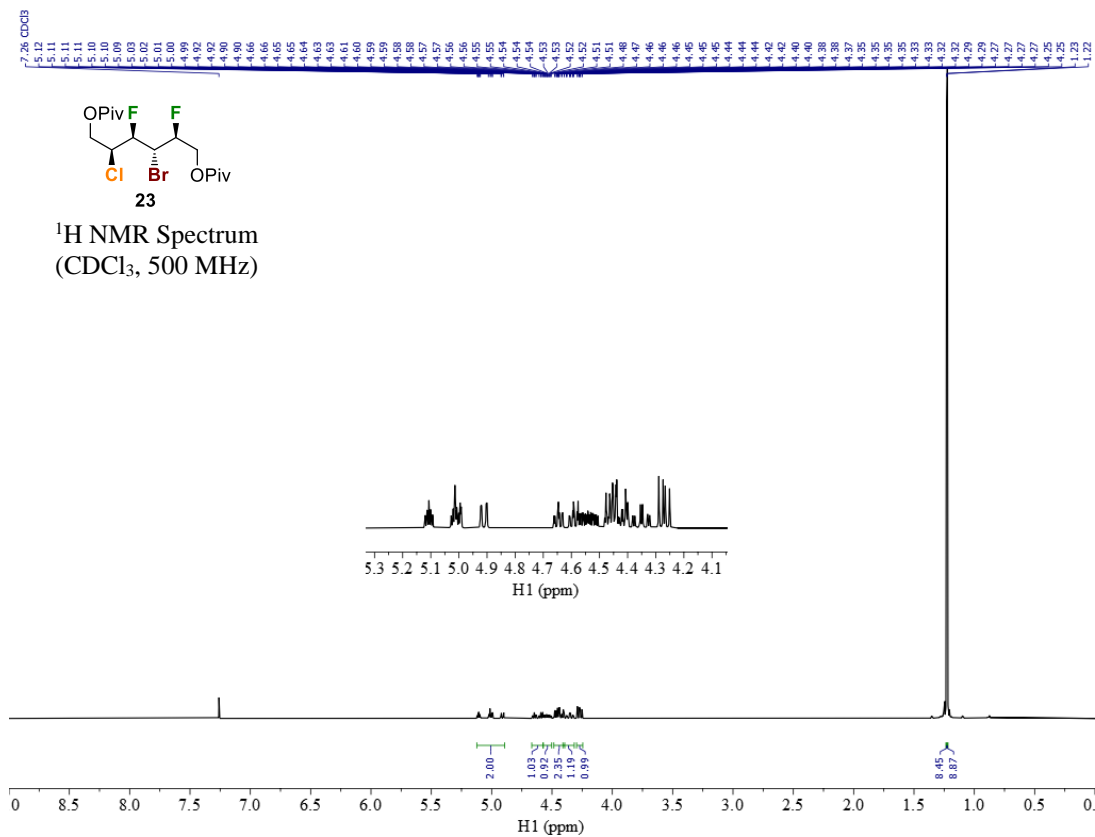

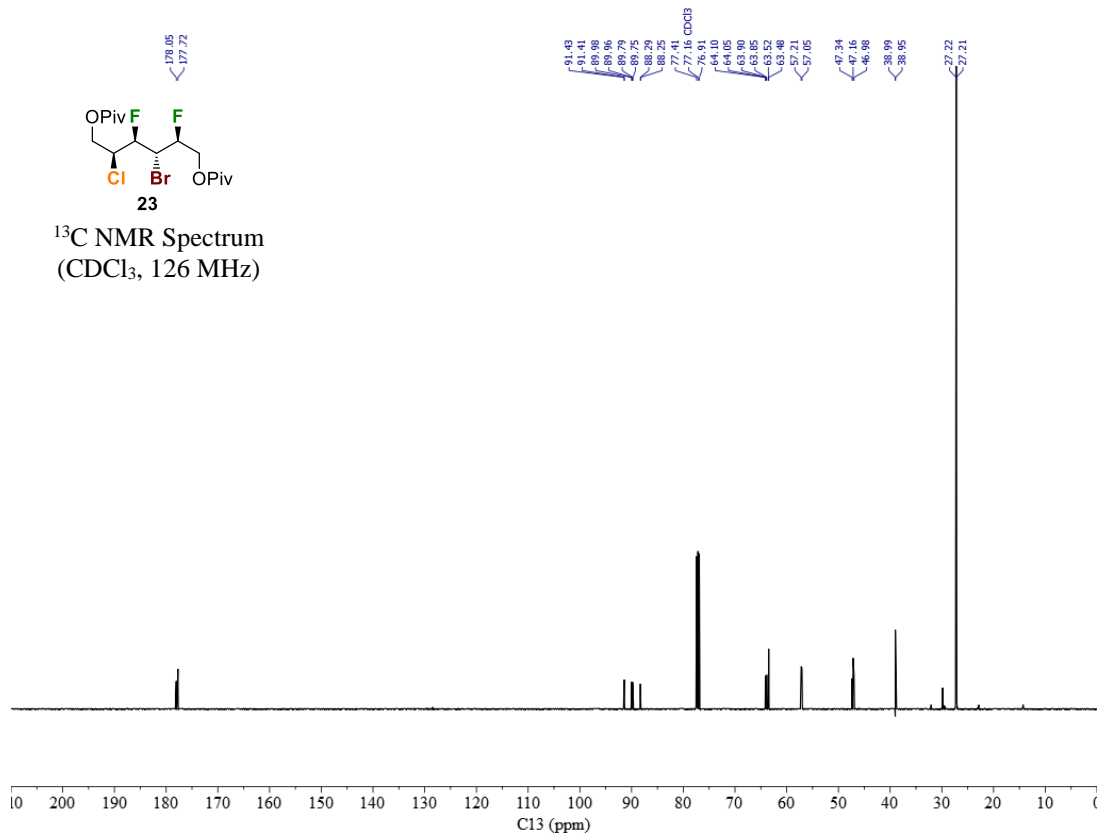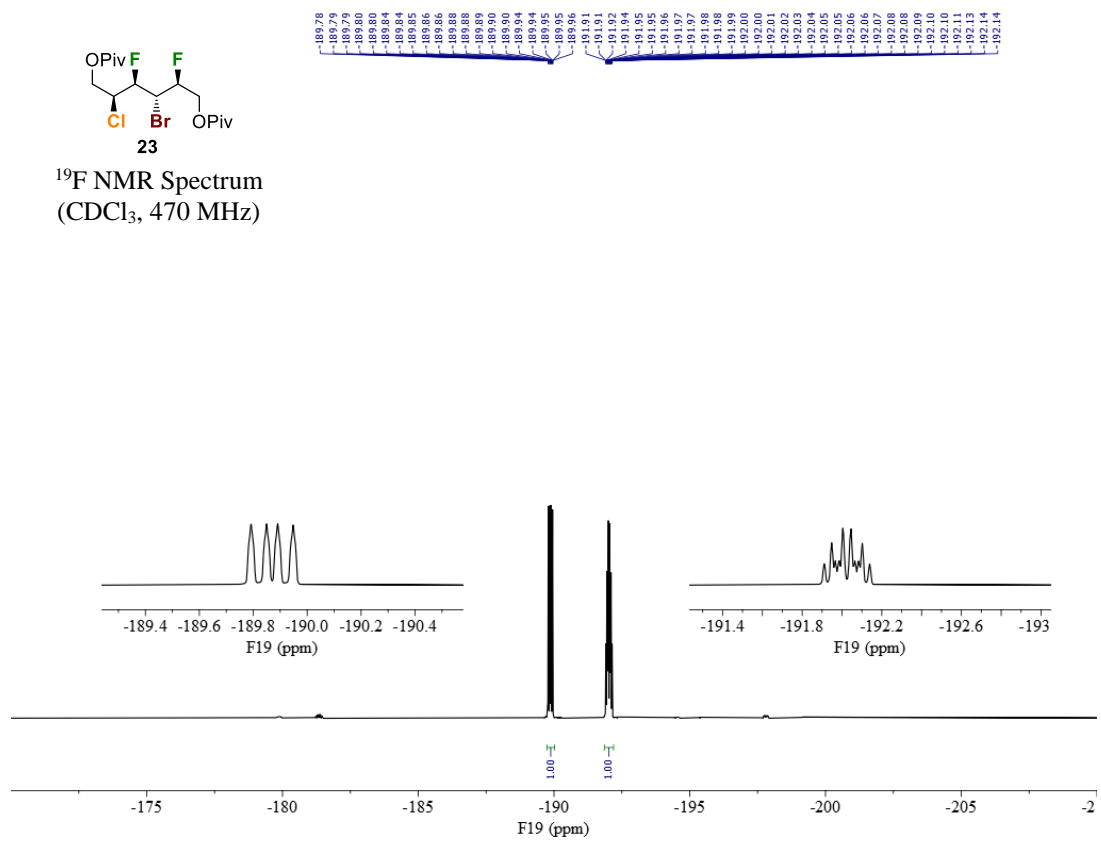

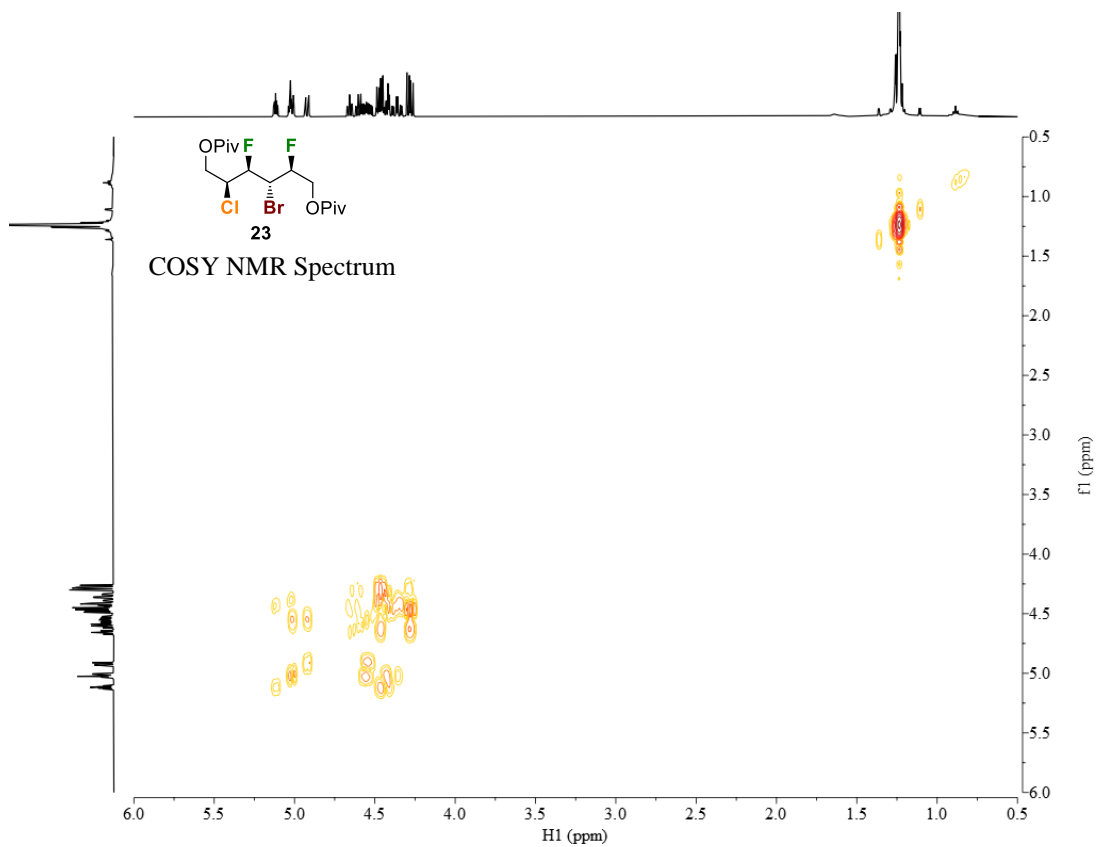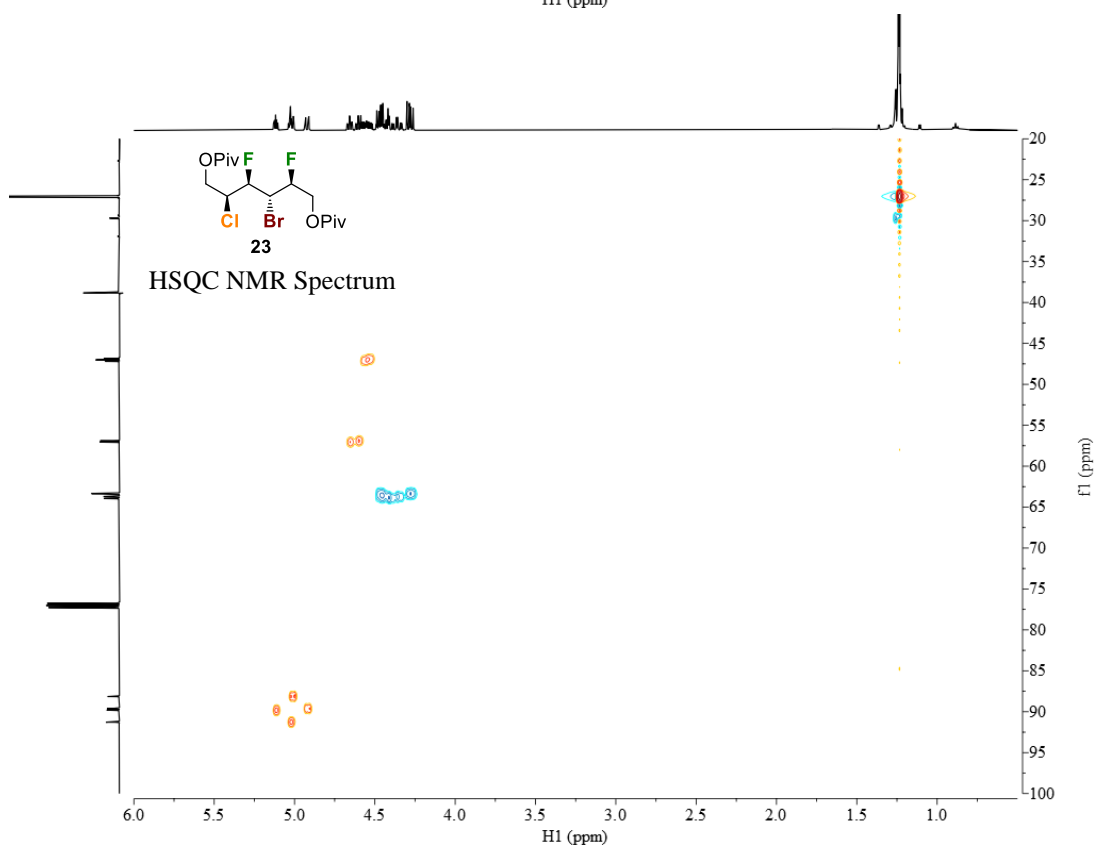

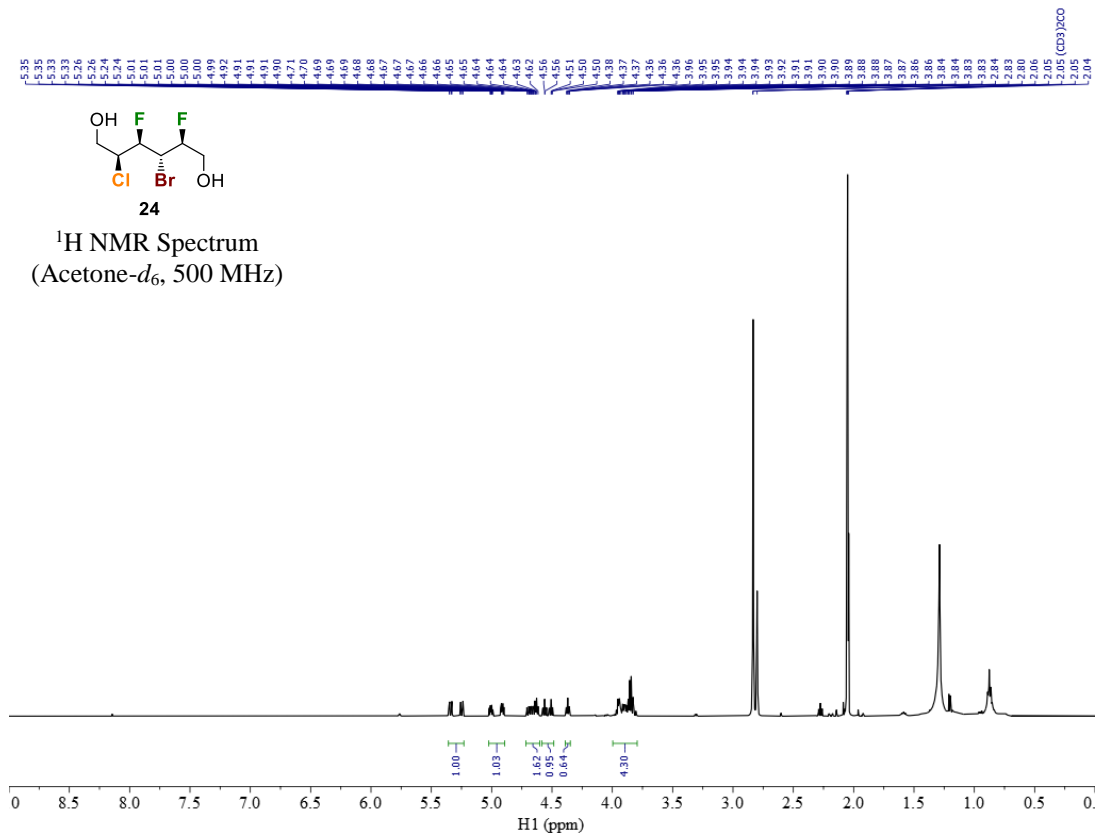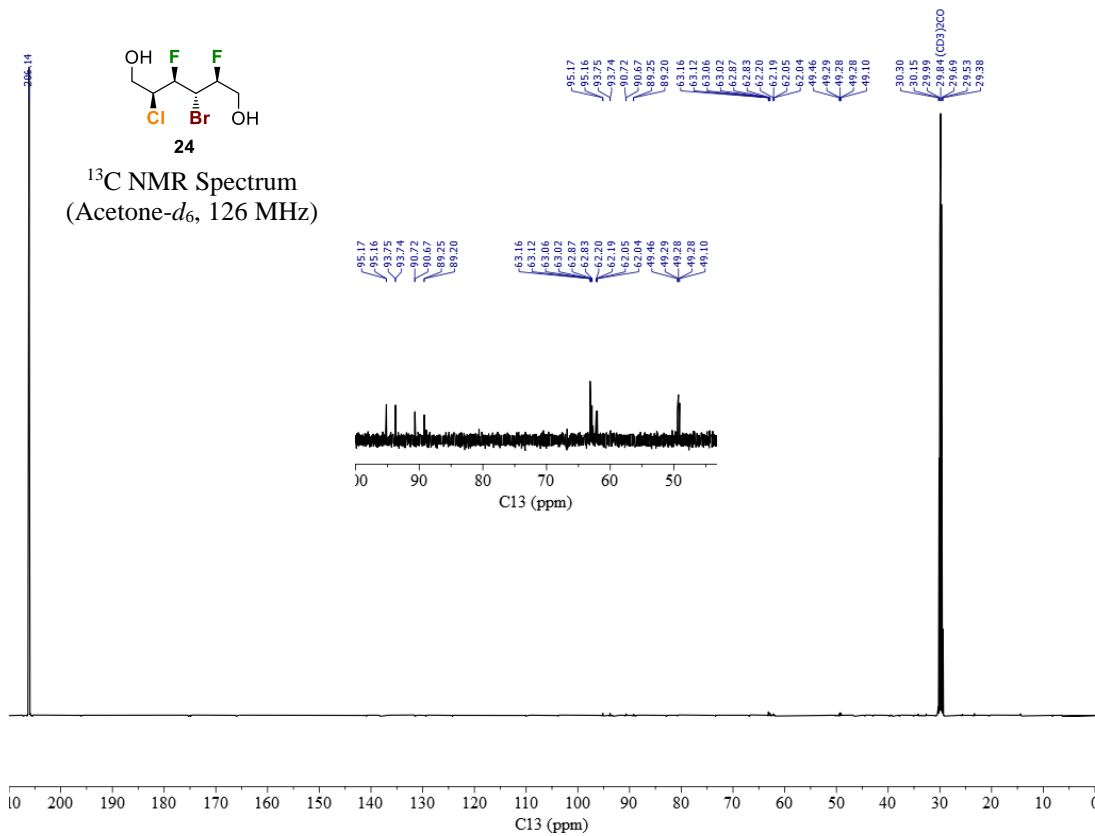

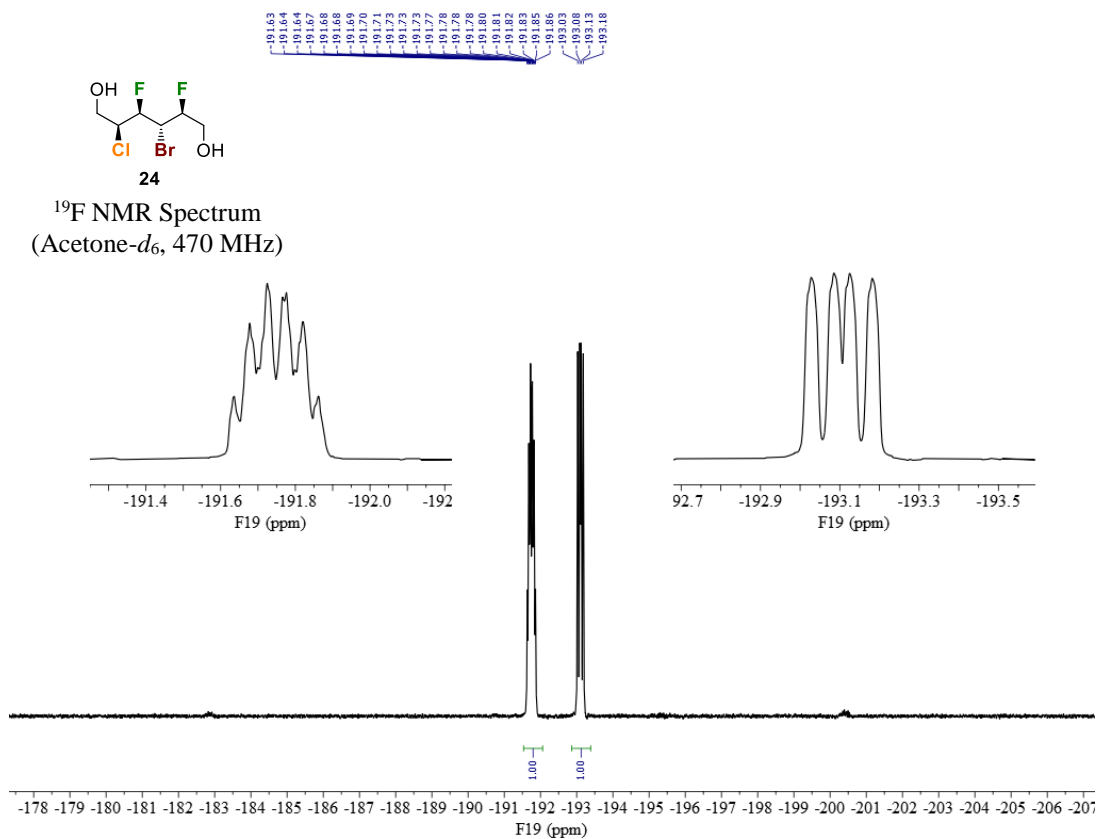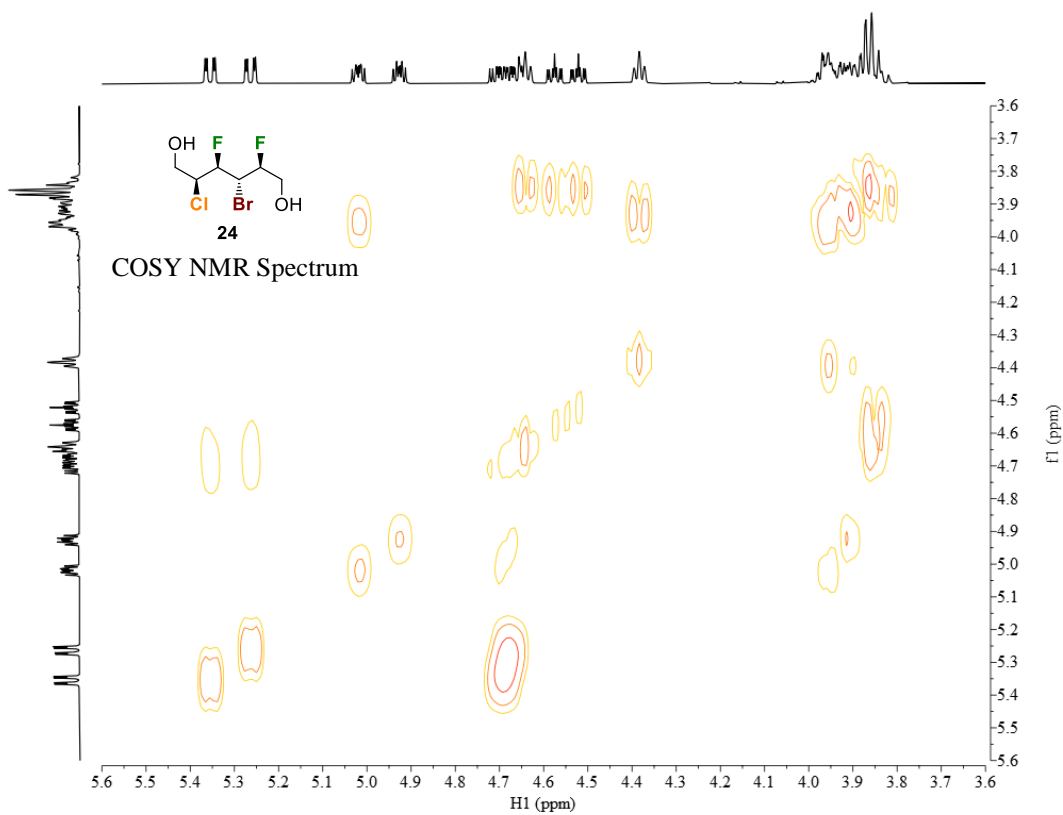

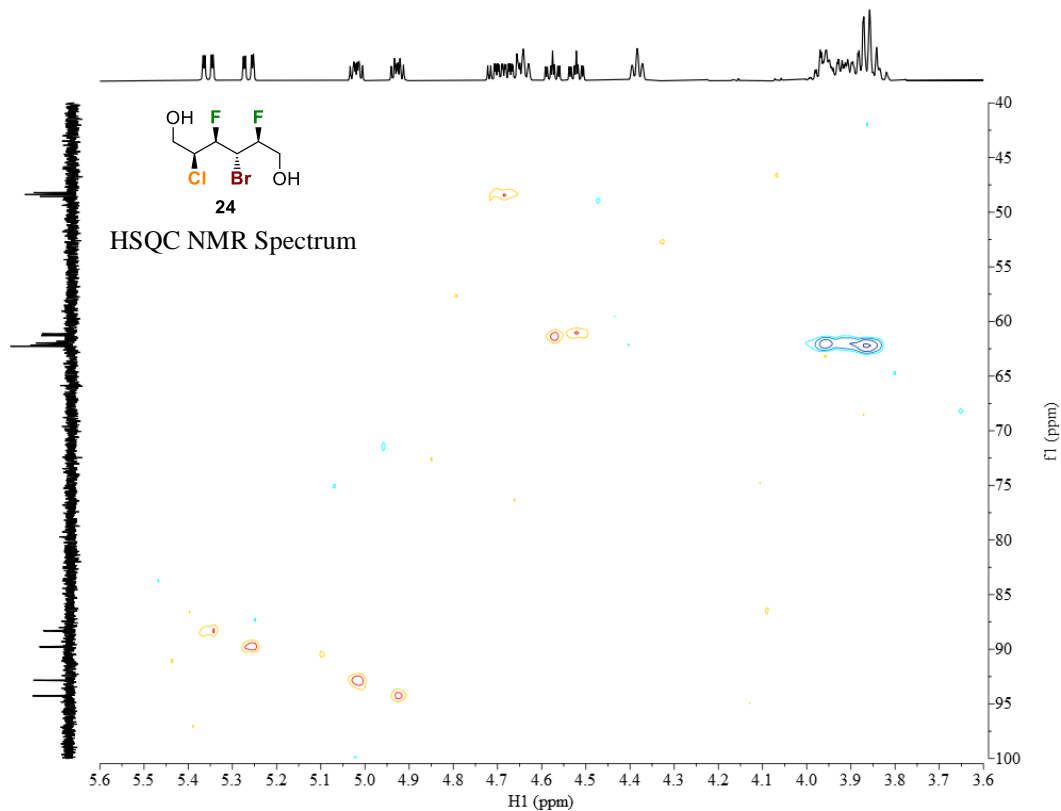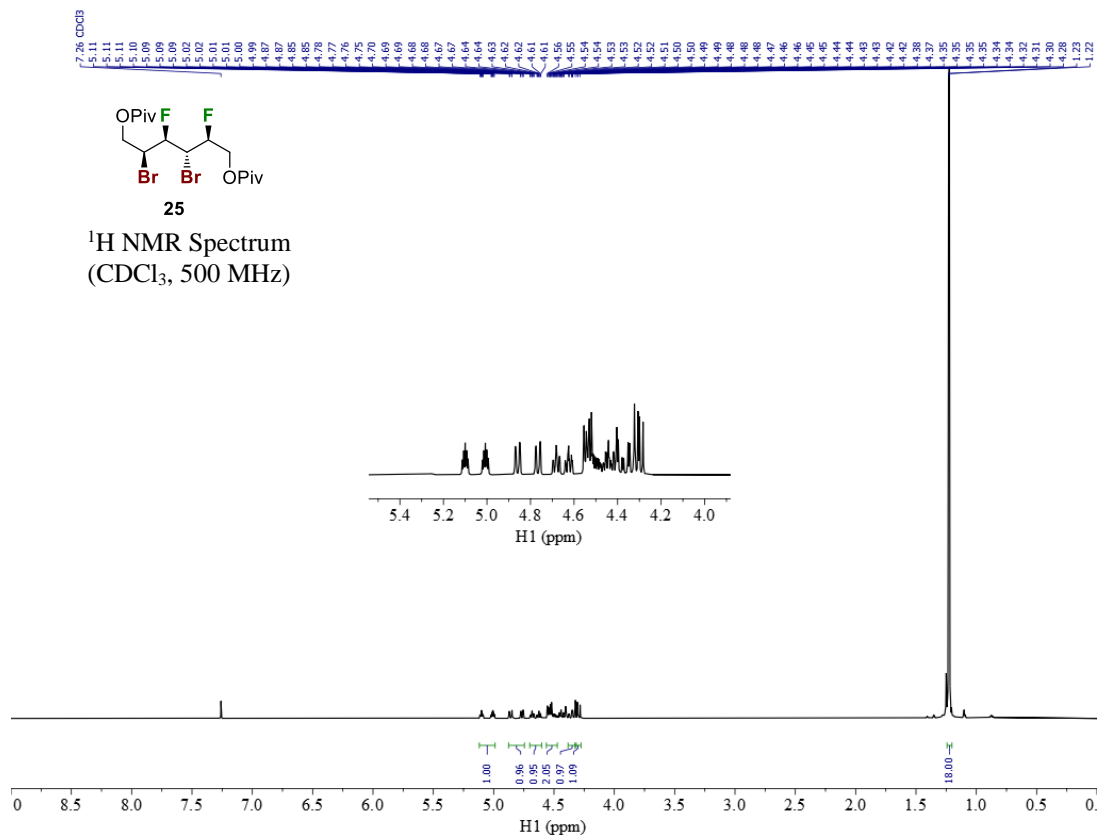

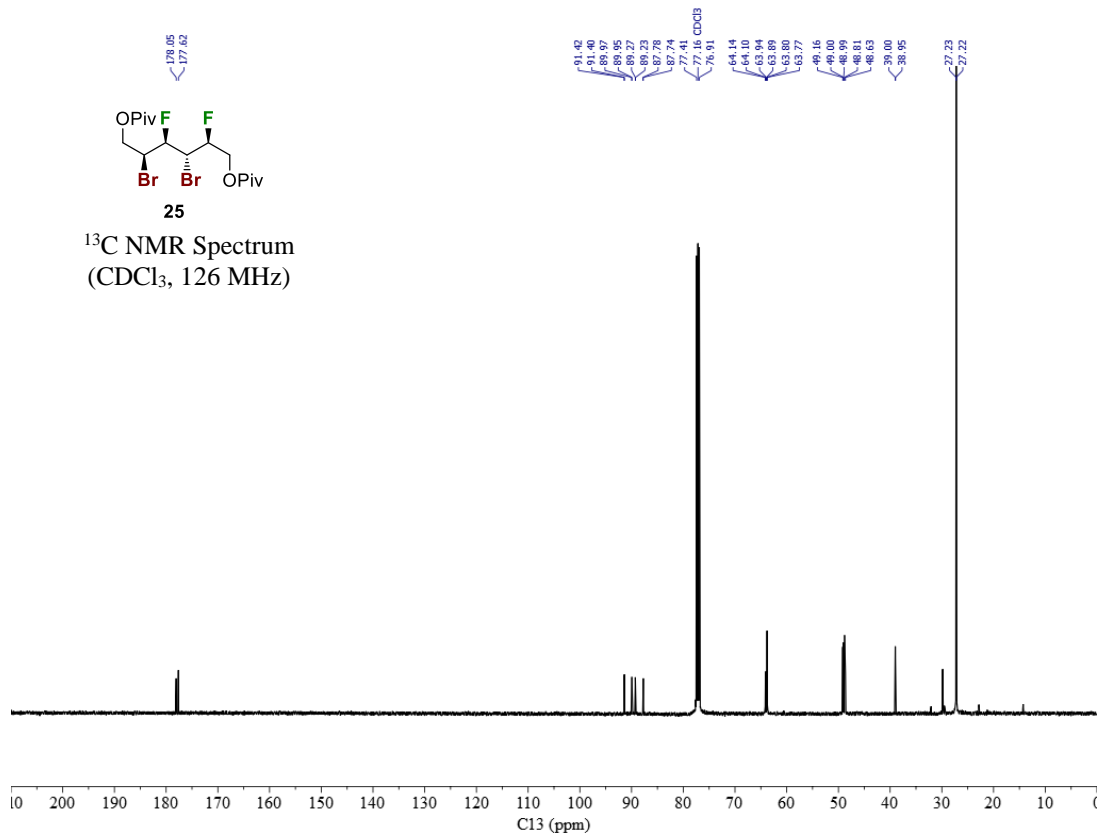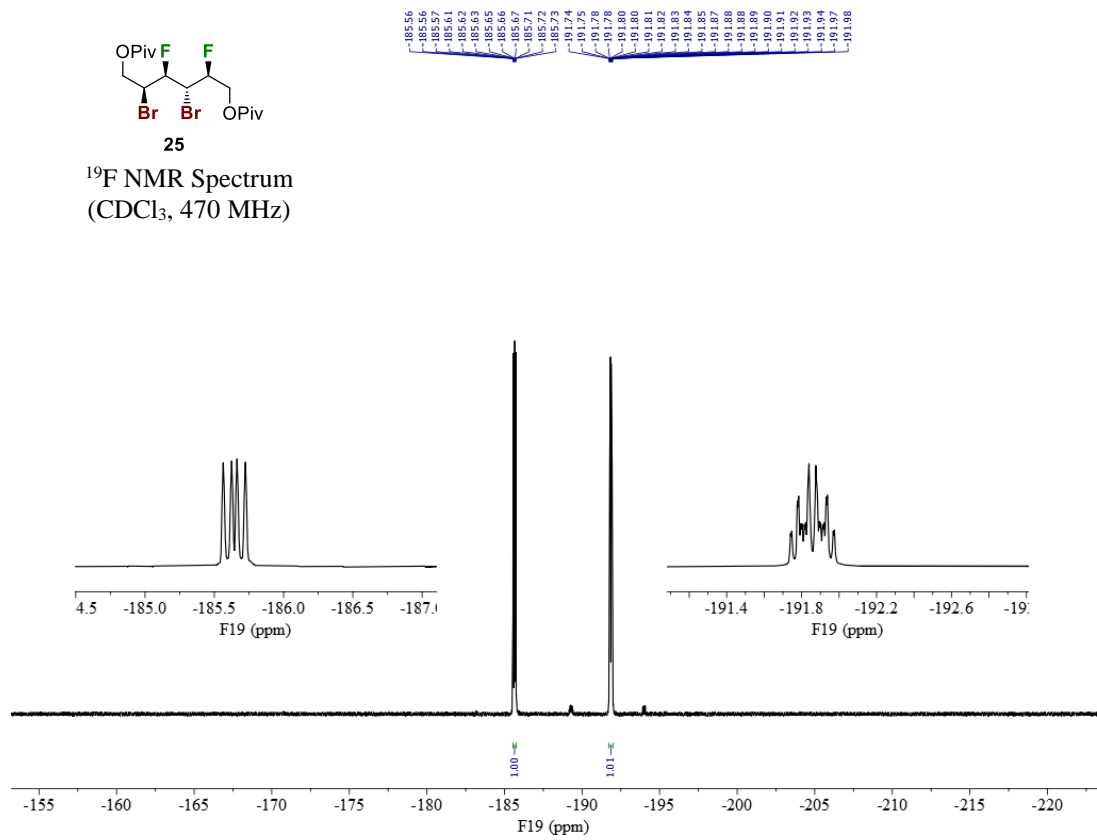



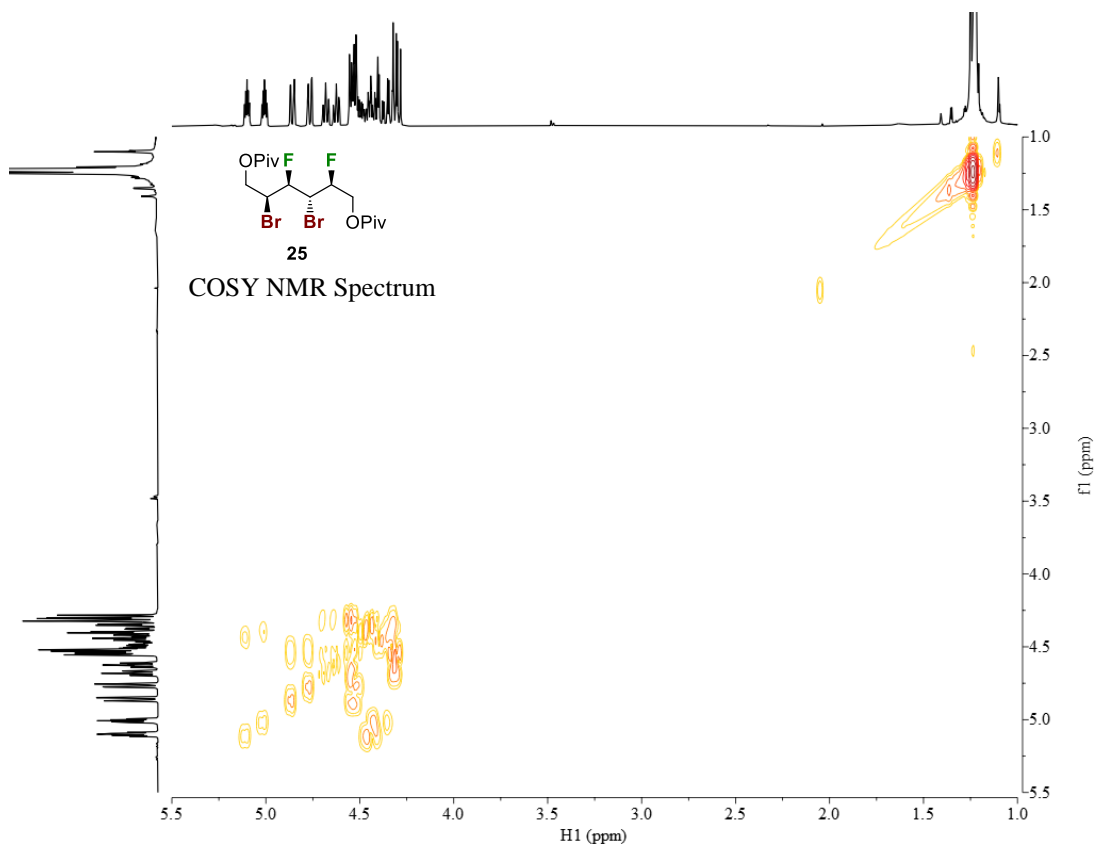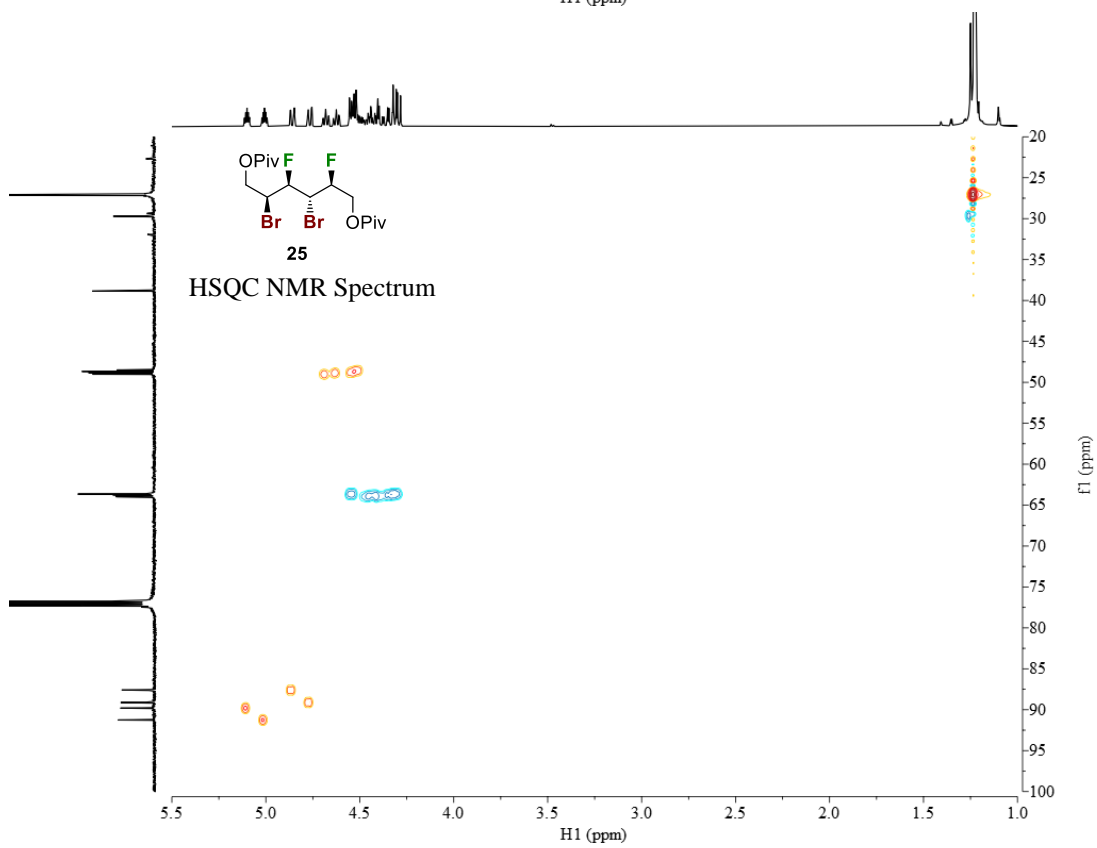

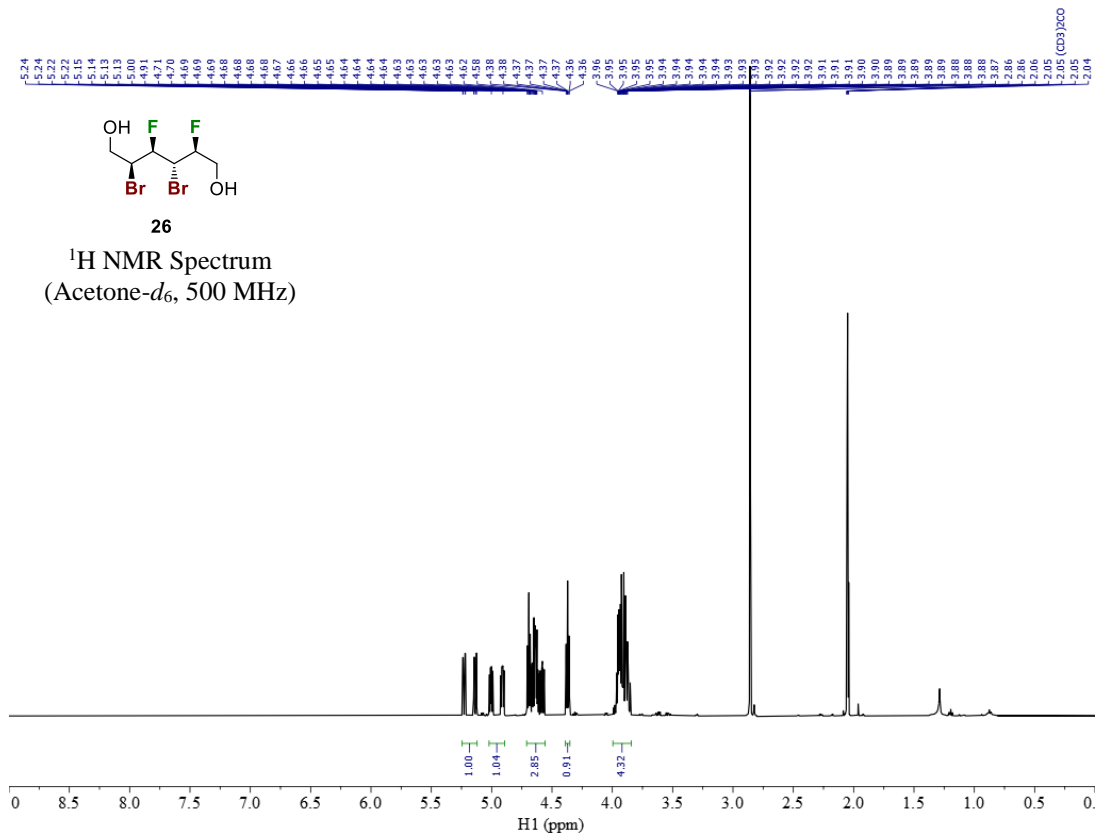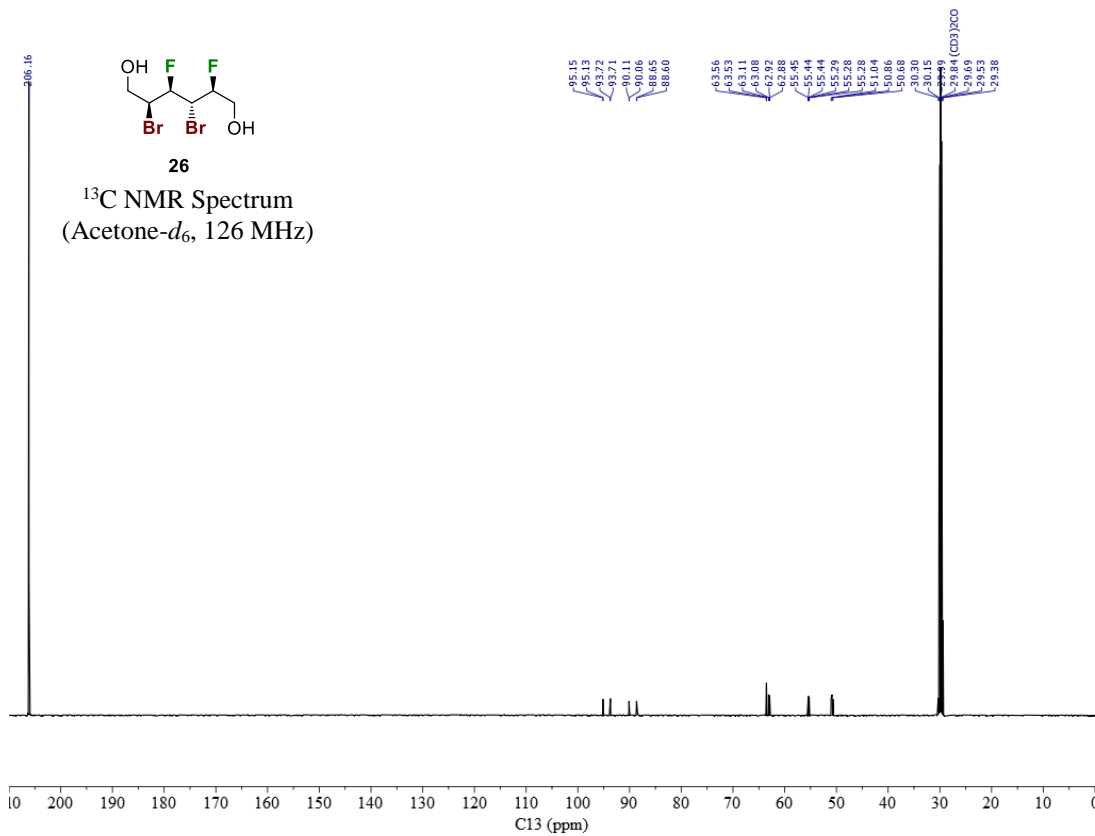

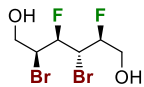

26

<sup>19</sup>F NMR Spectrum  
(Acetone-*d*<sub>6</sub>, 470 MHz)

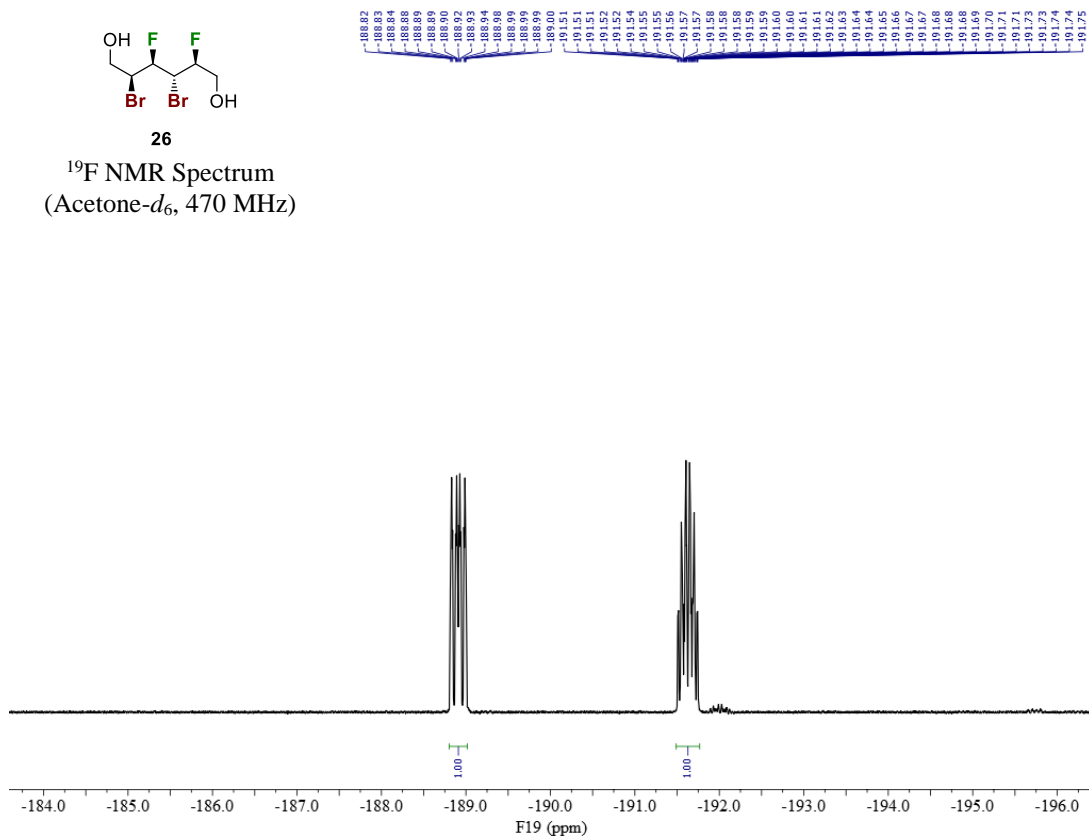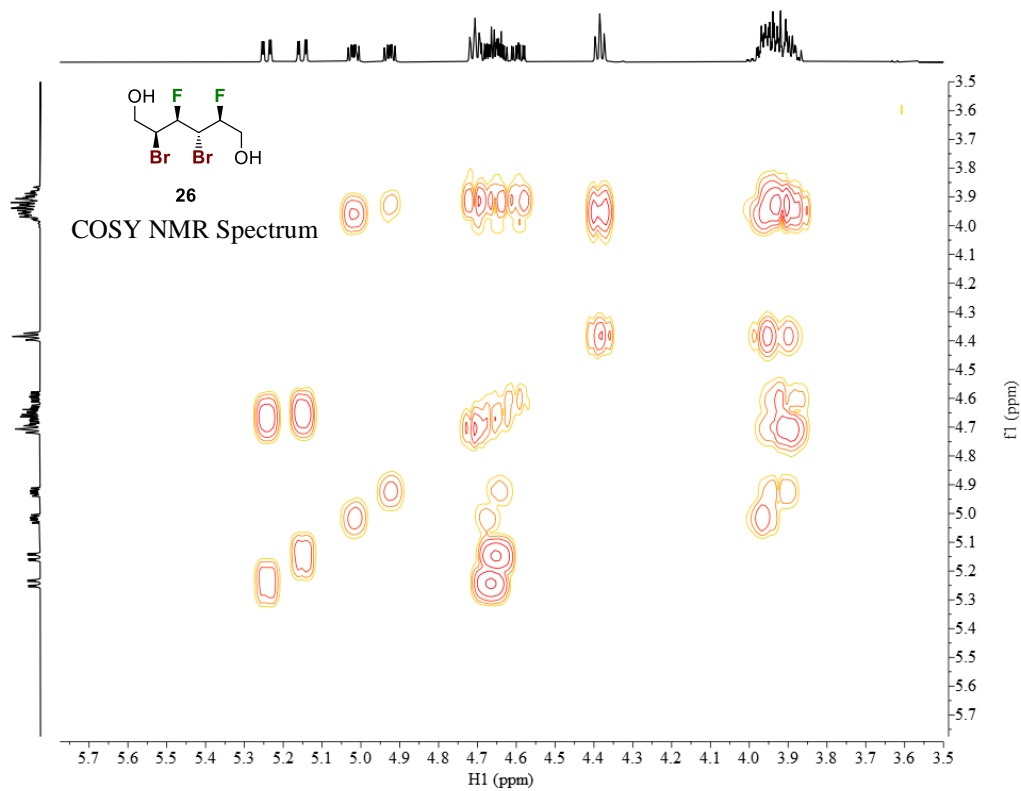

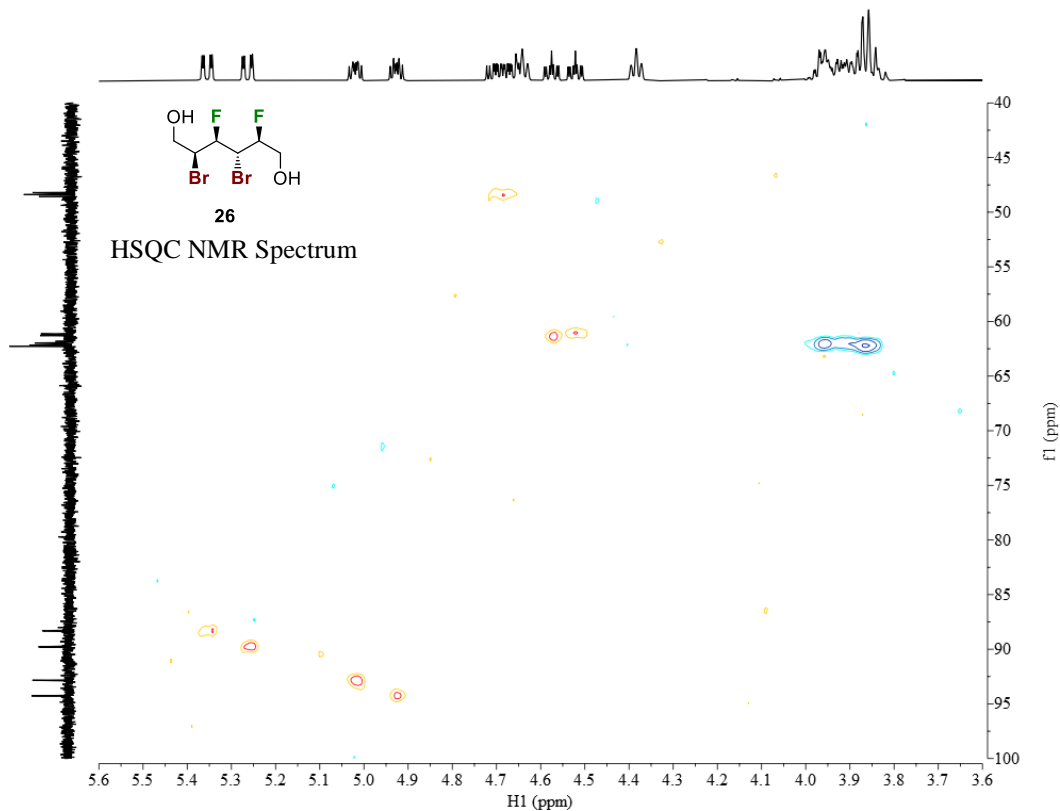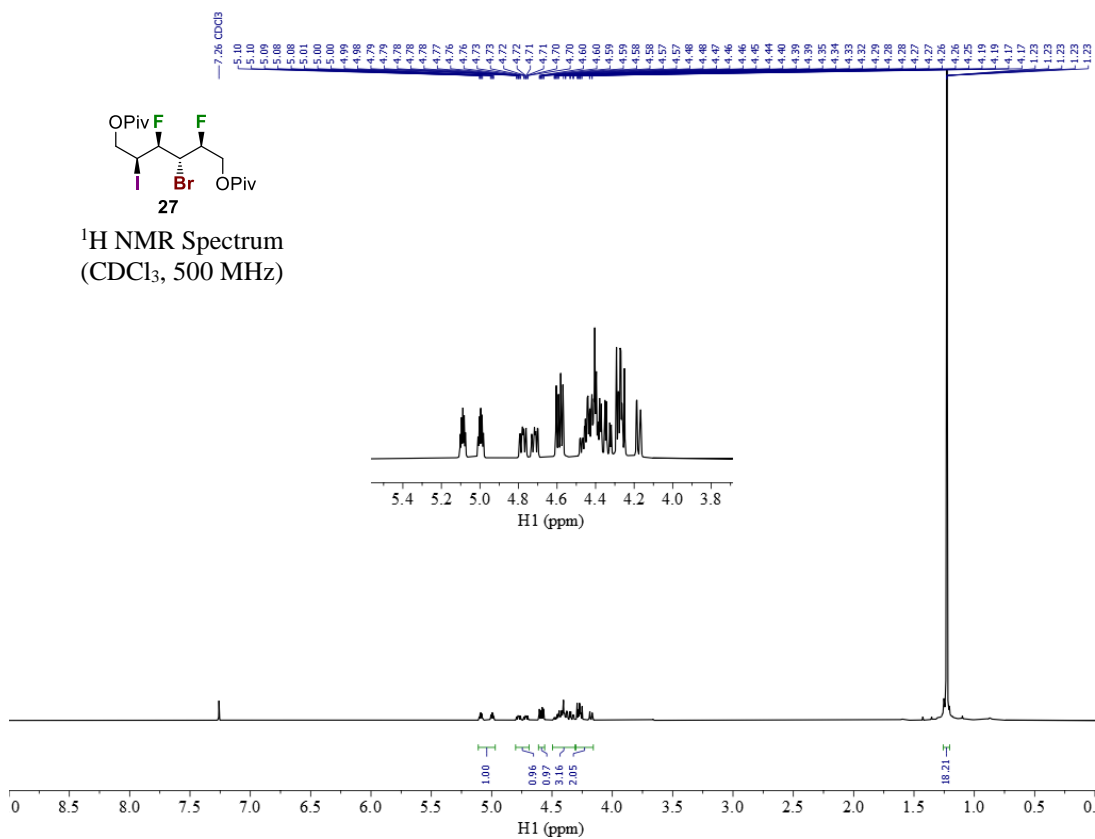

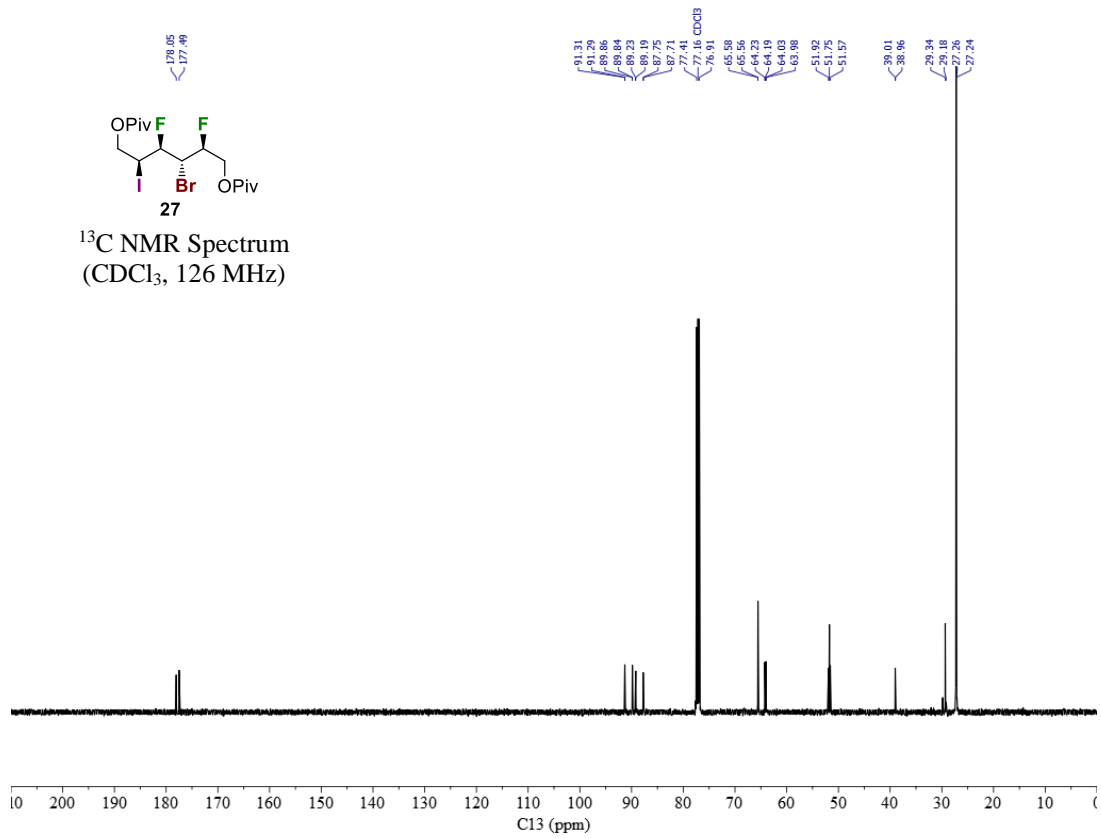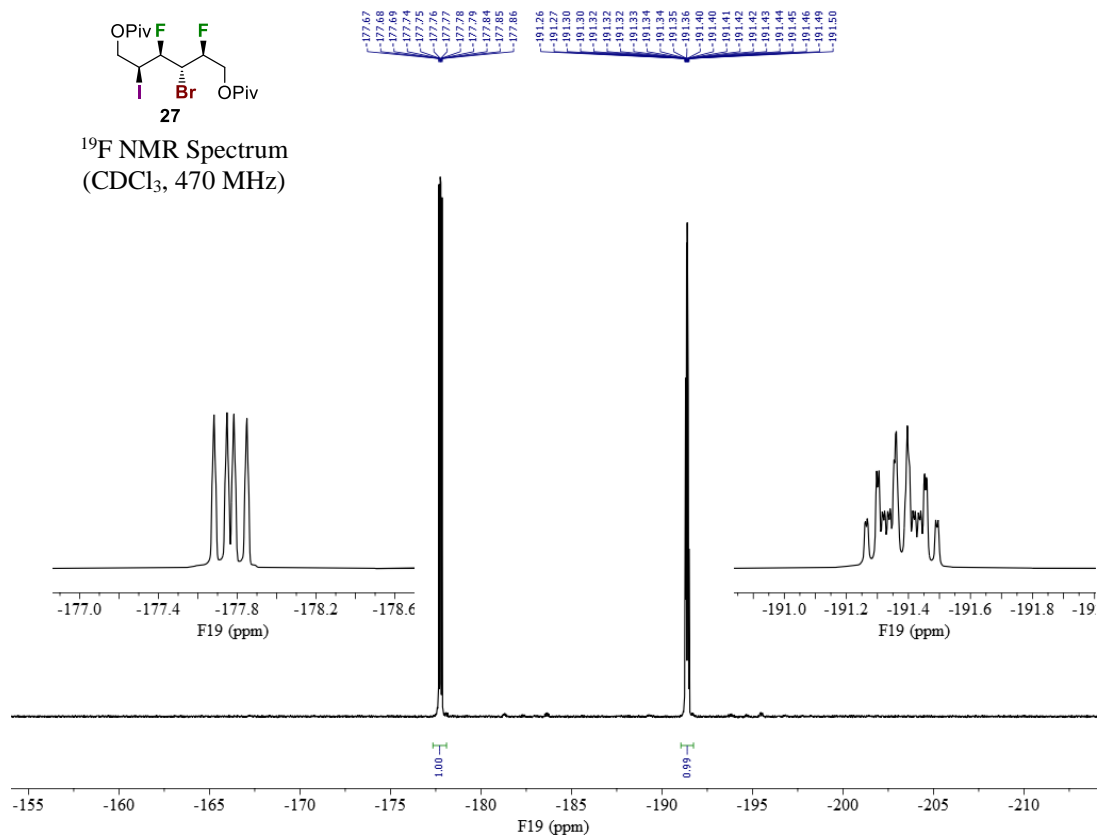

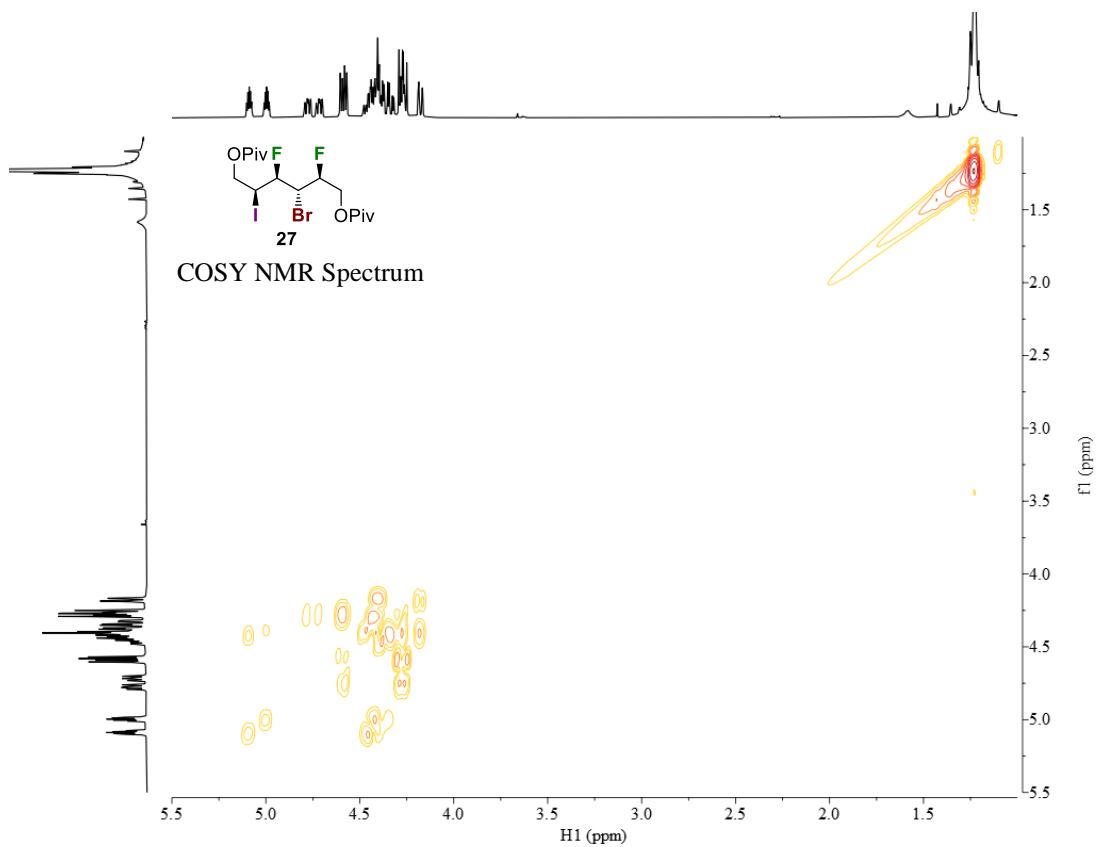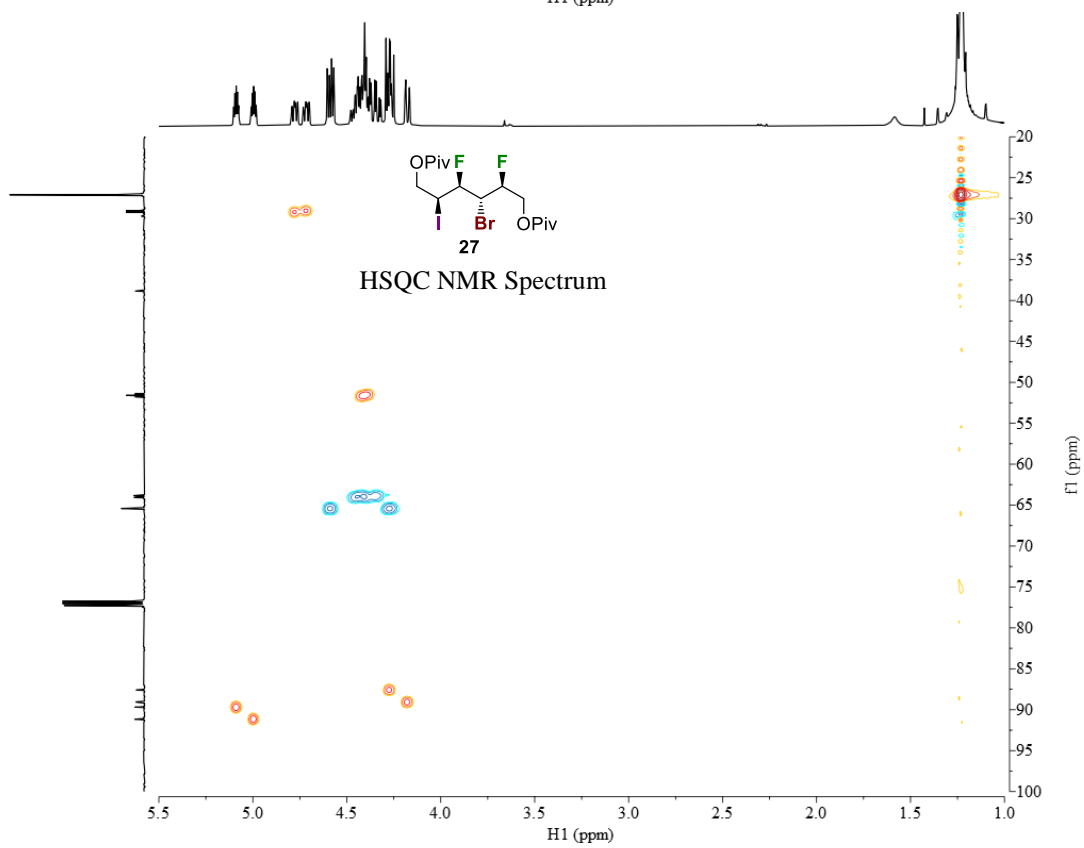

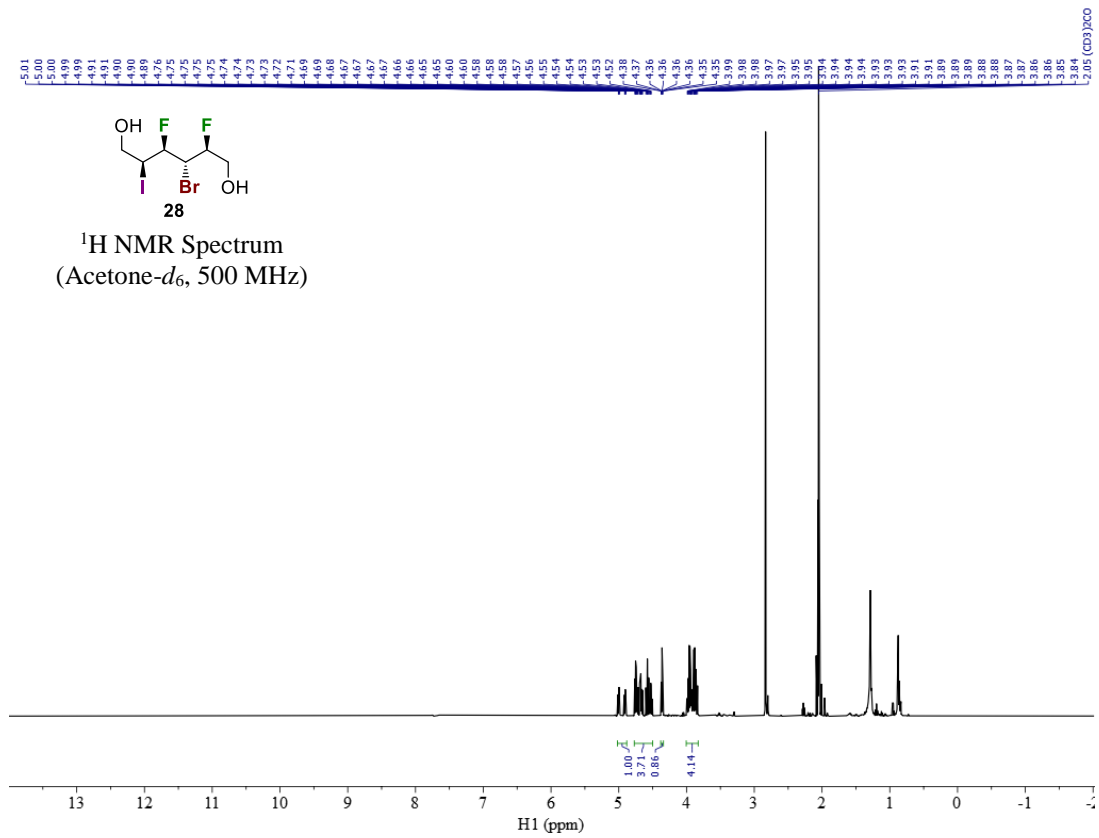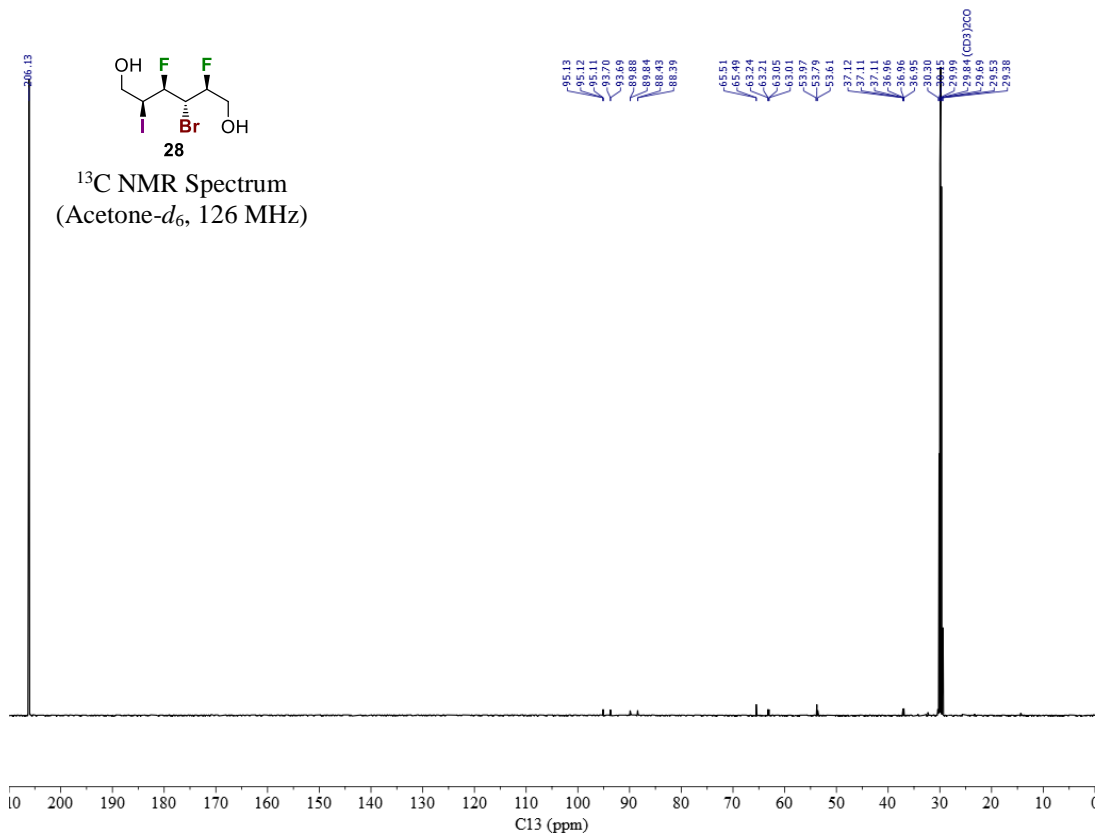

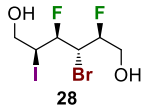

<sup>19</sup>F NMR Spectrum  
(Acetone-*d*<sub>6</sub>, 470 MHz)

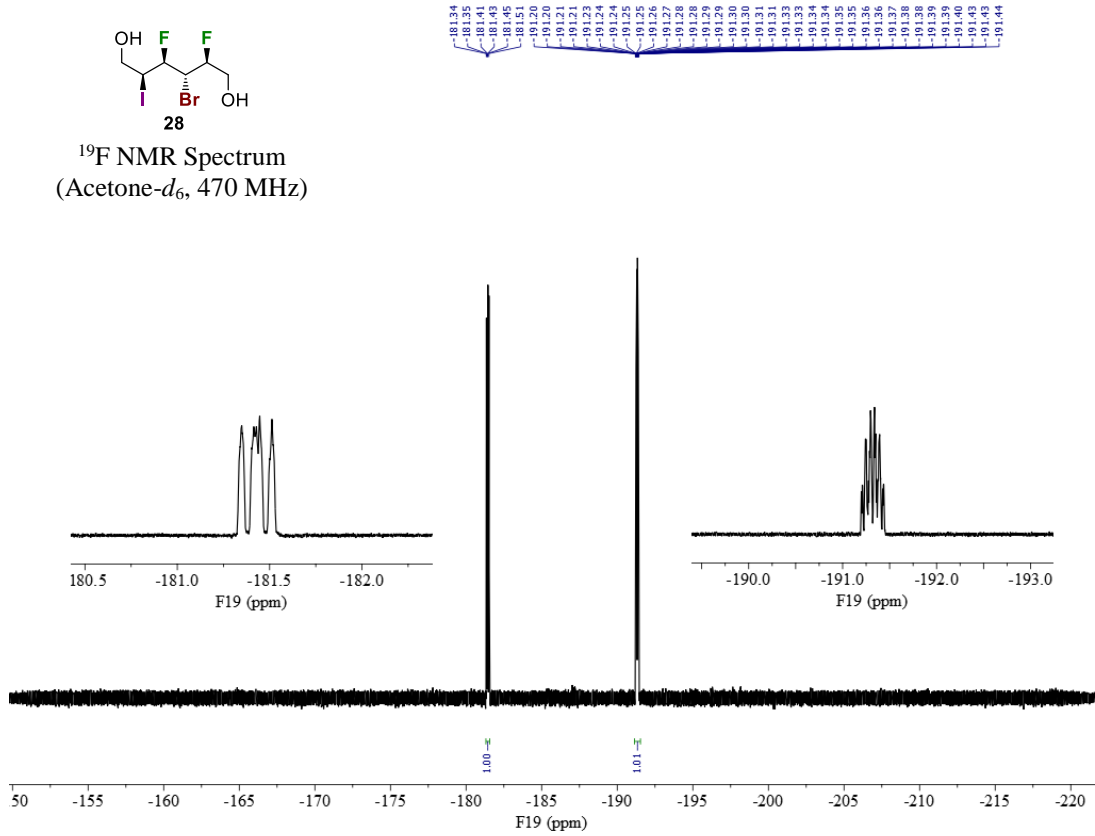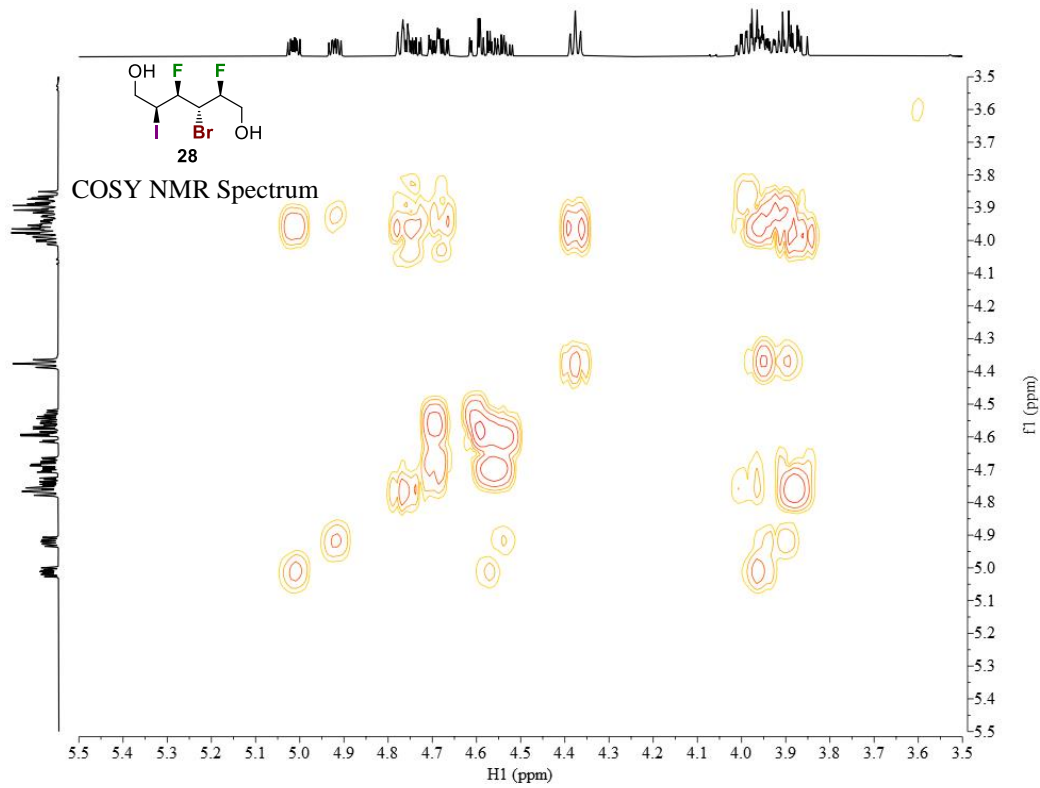



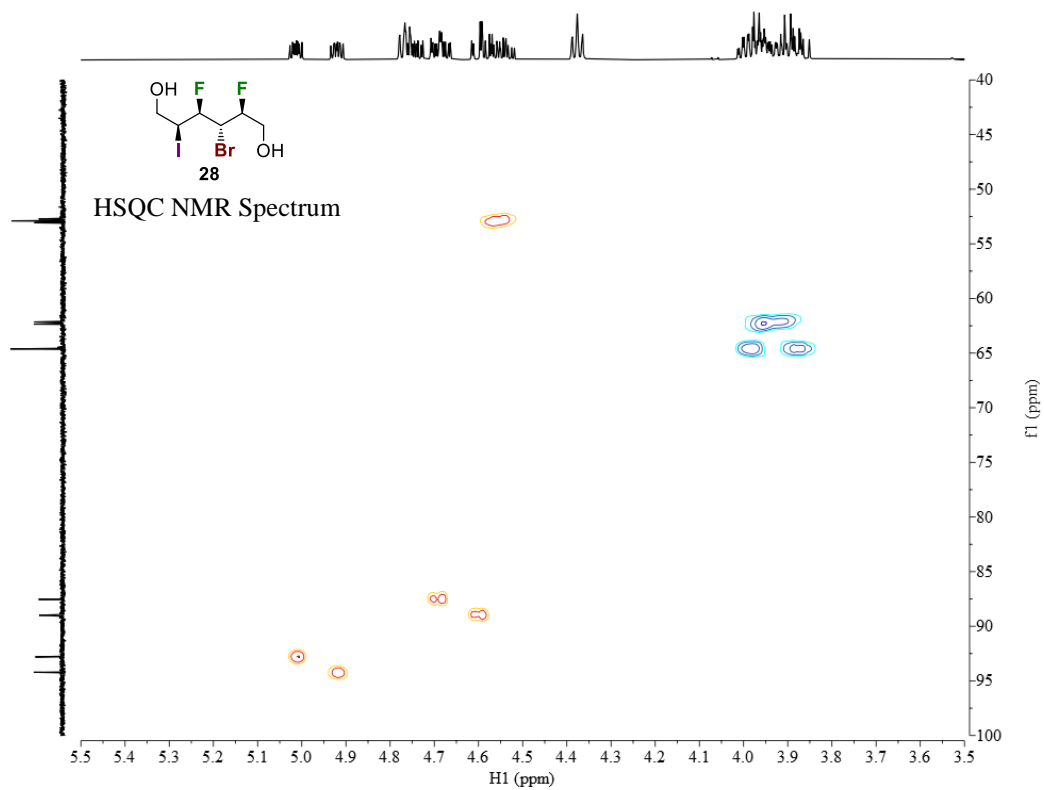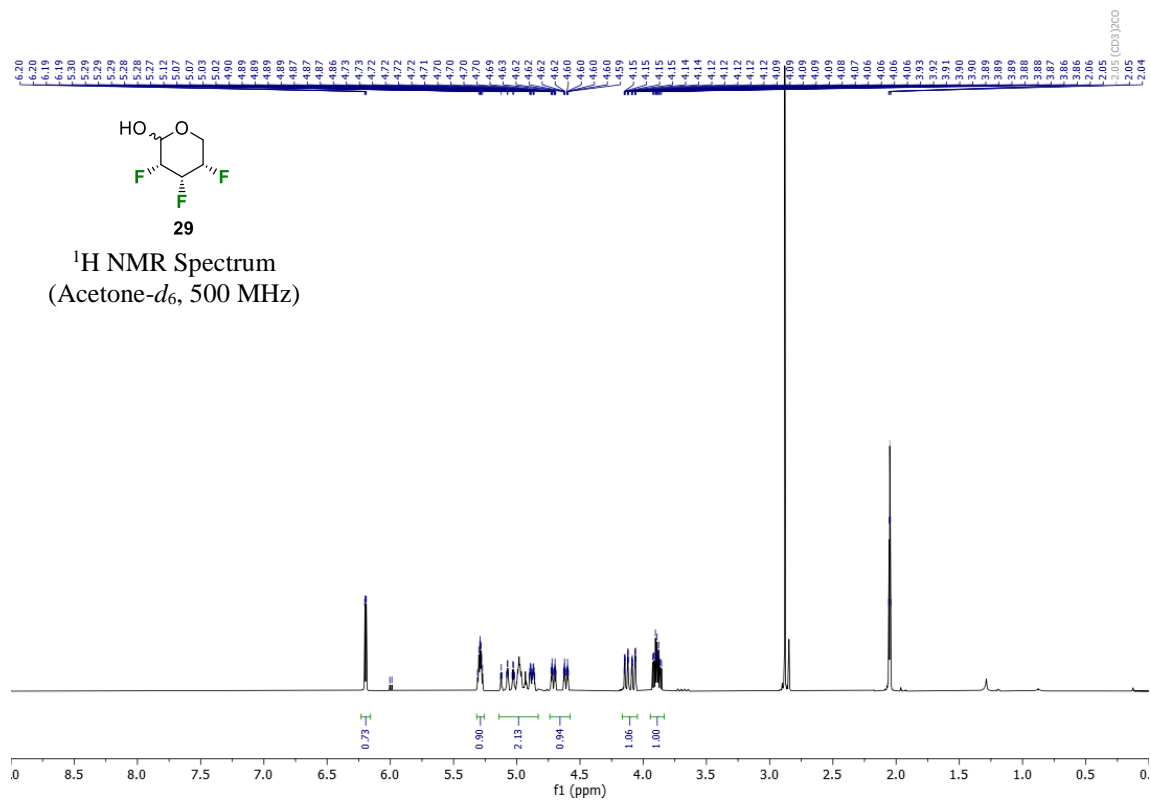

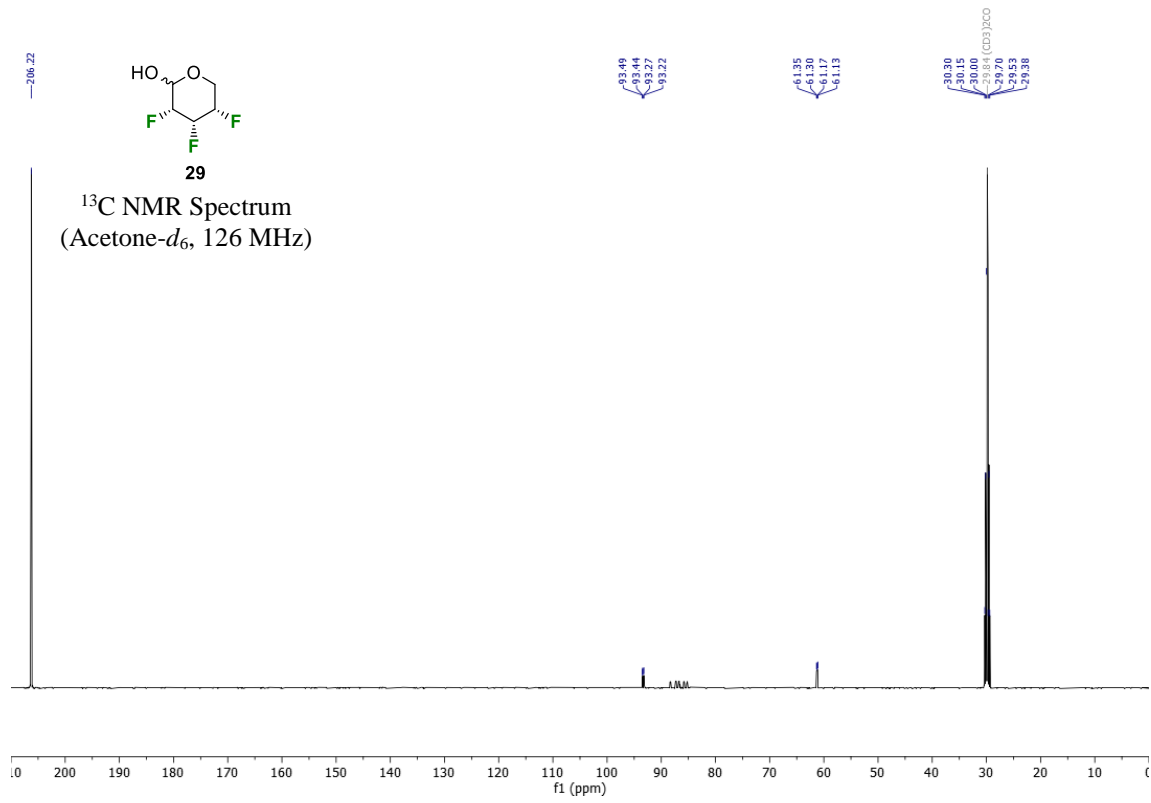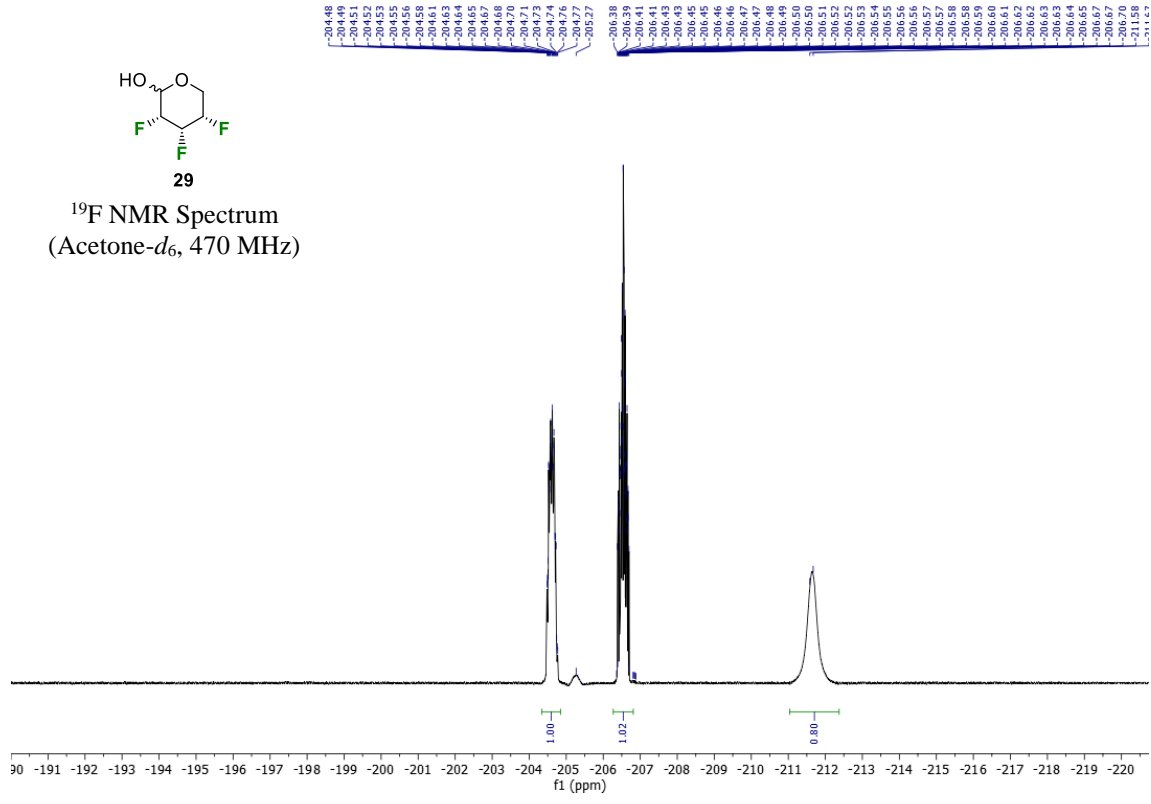

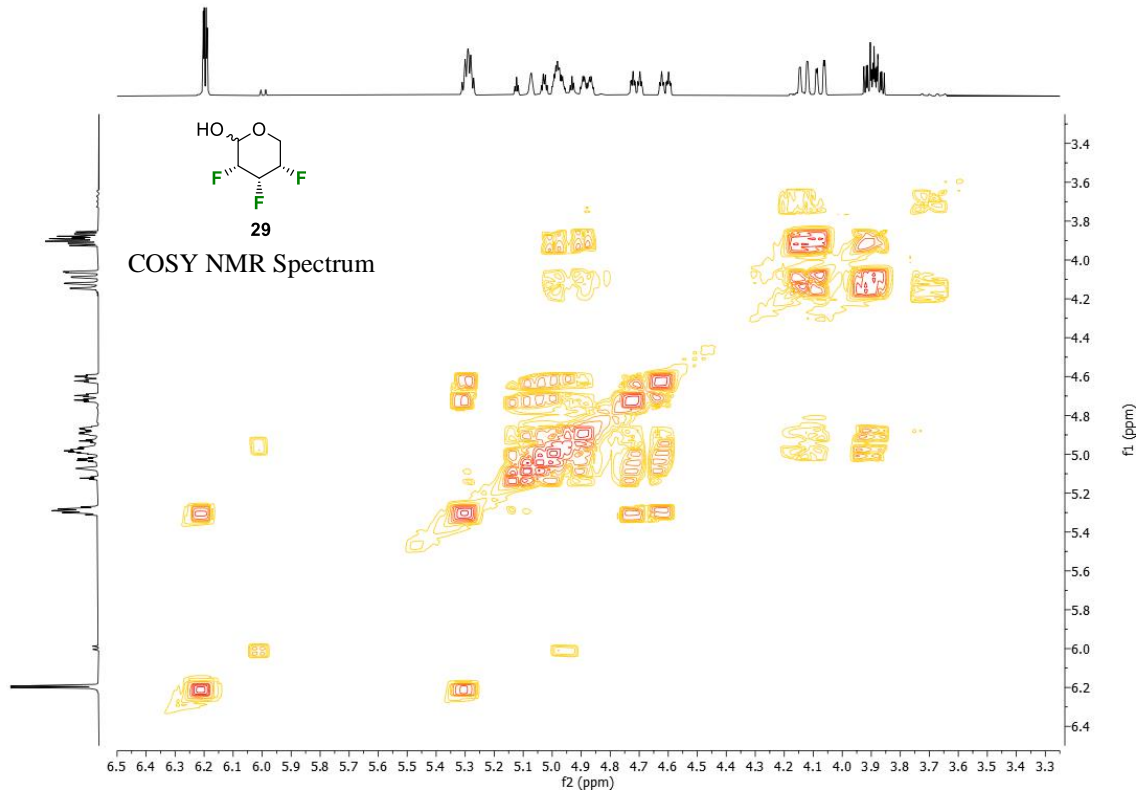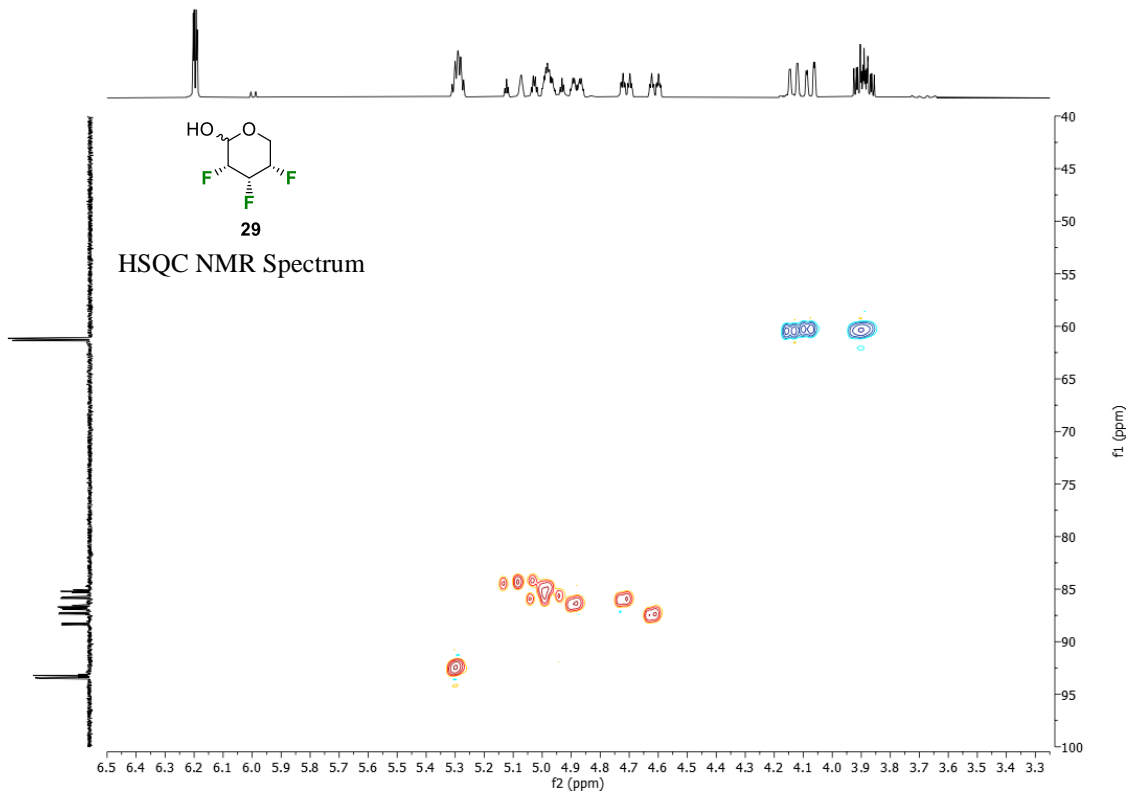

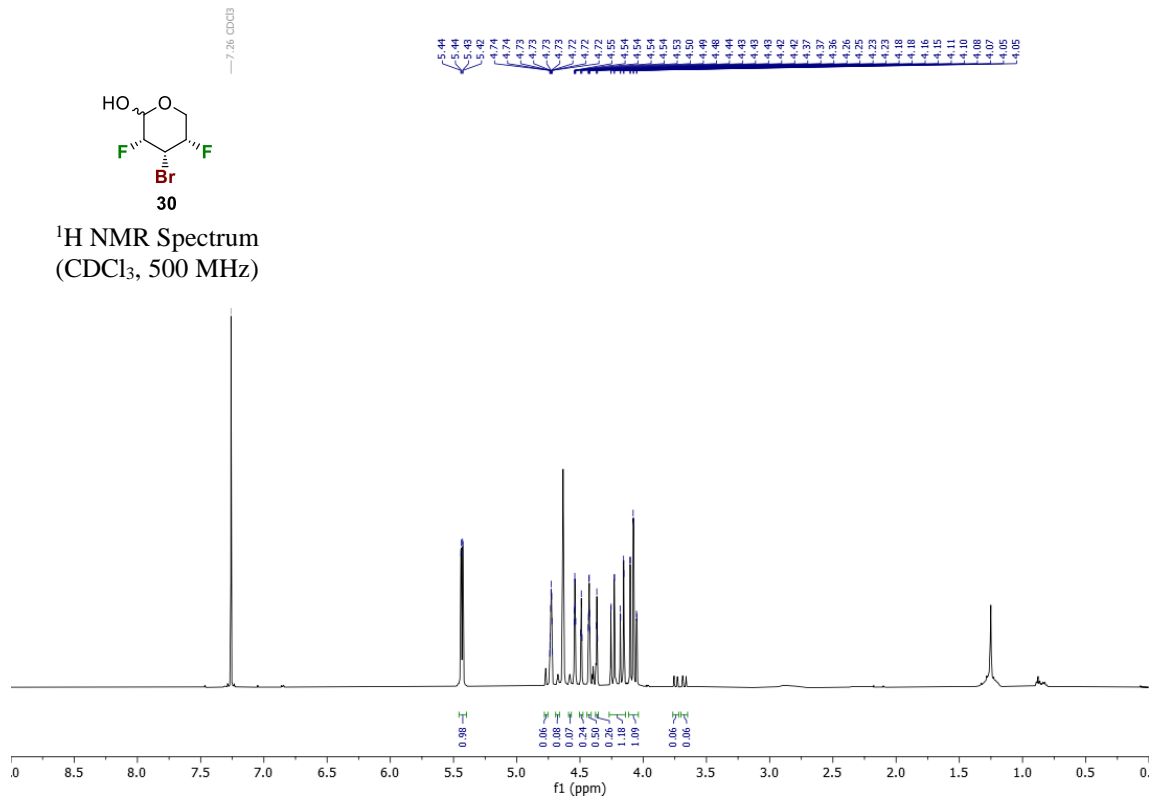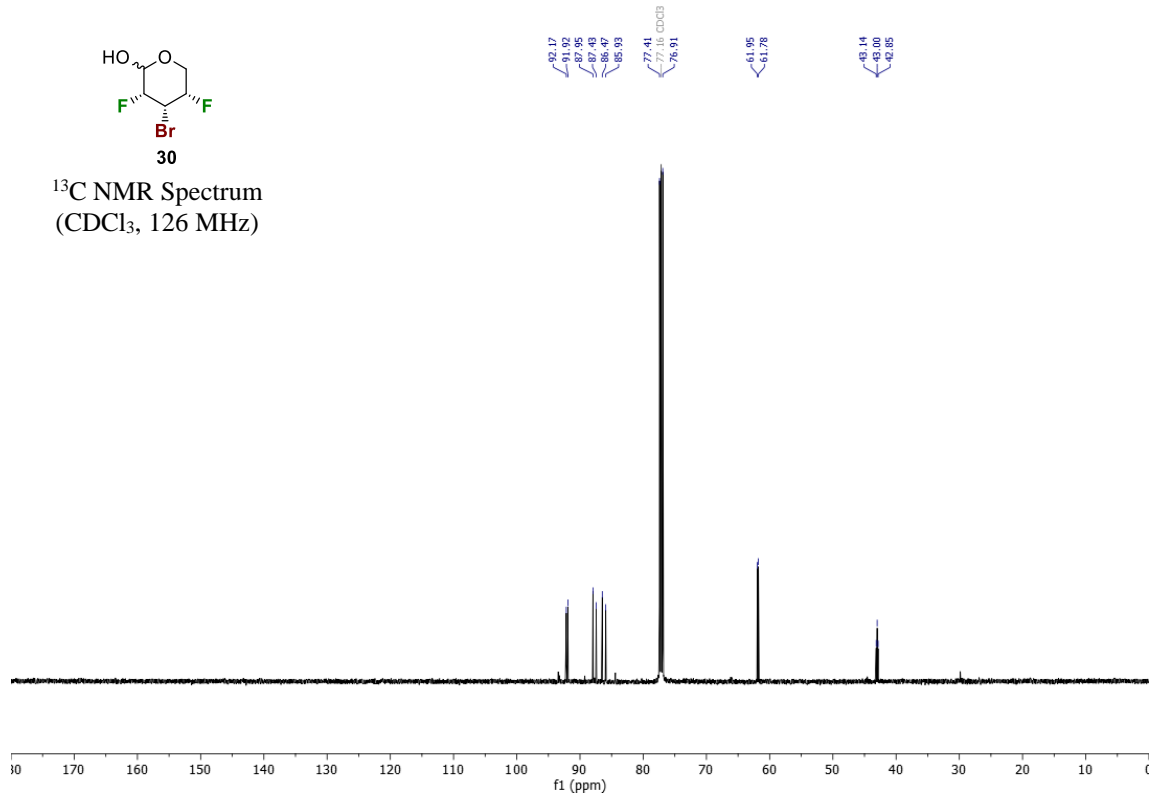

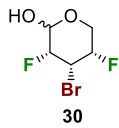

<sup>19</sup>F NMR Spectrum  
(CDCl<sub>3</sub>, 470 MHz)

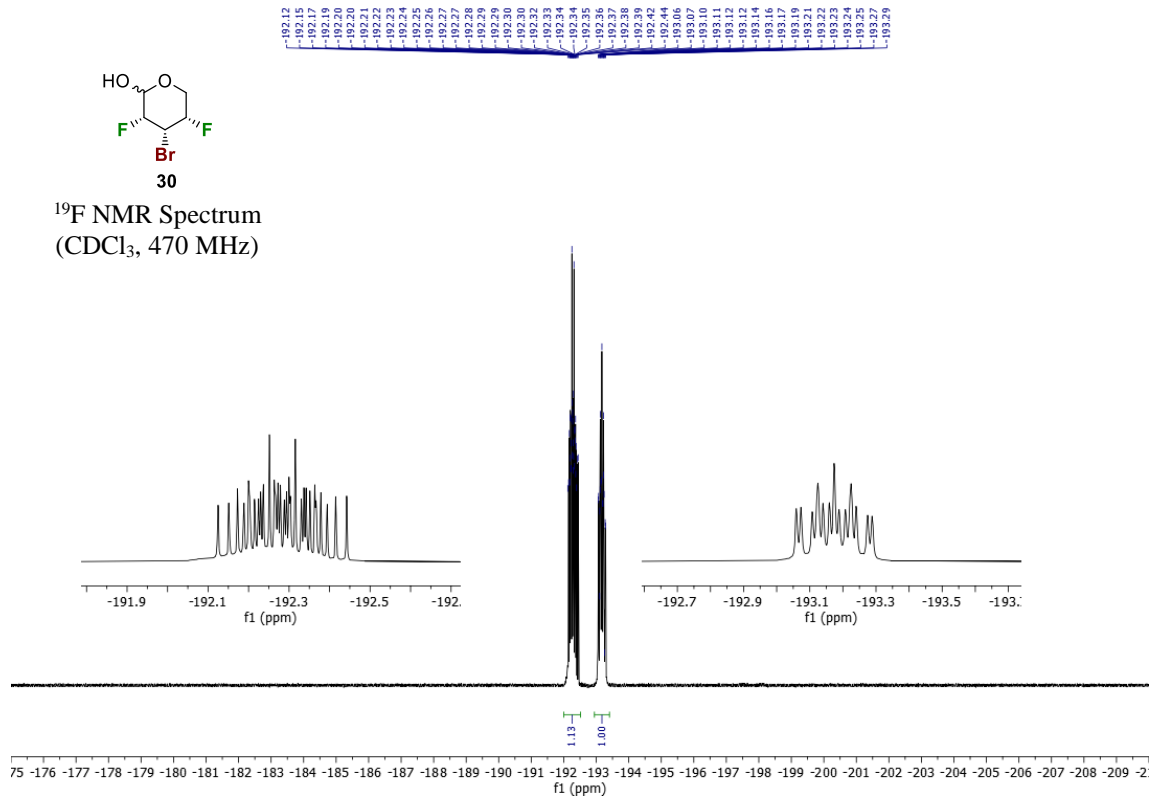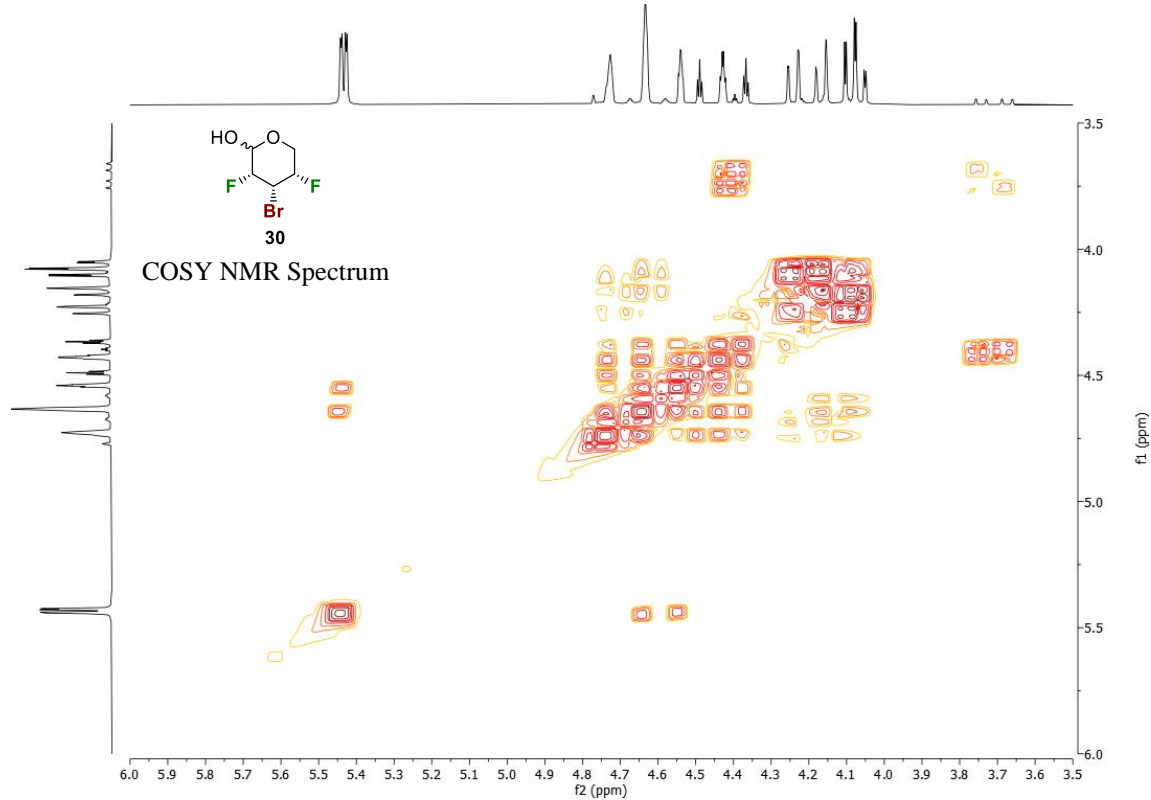





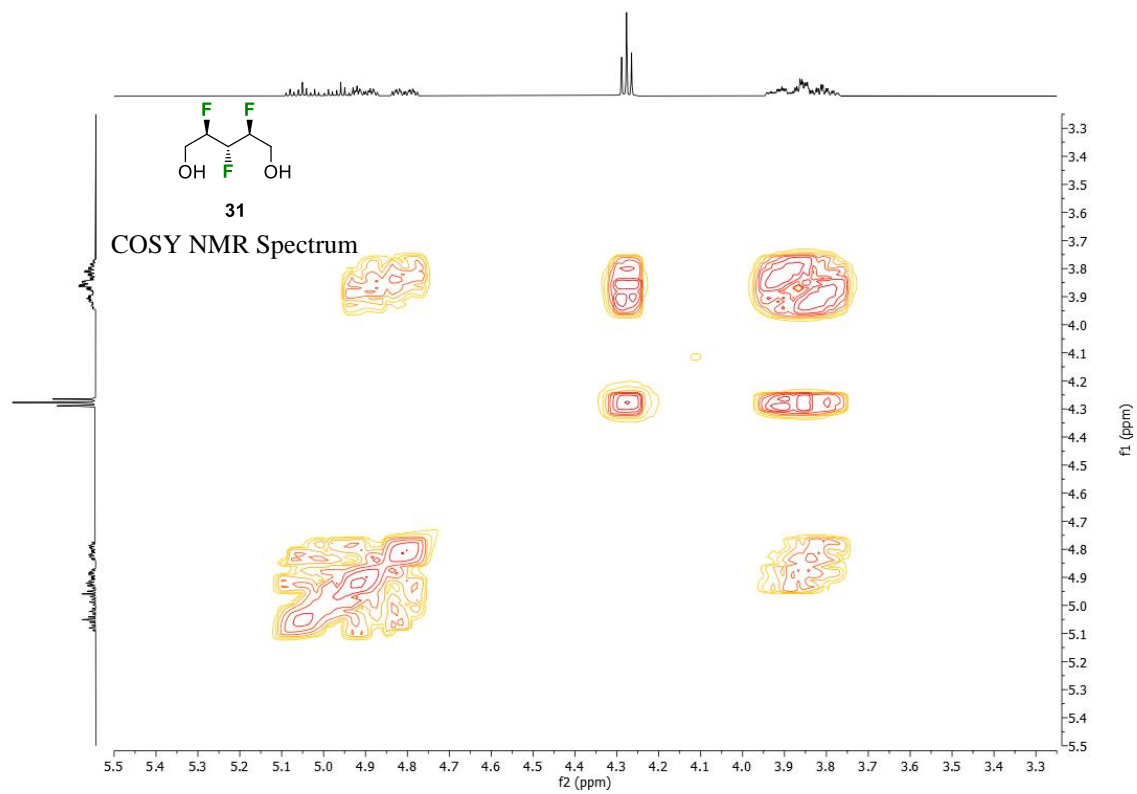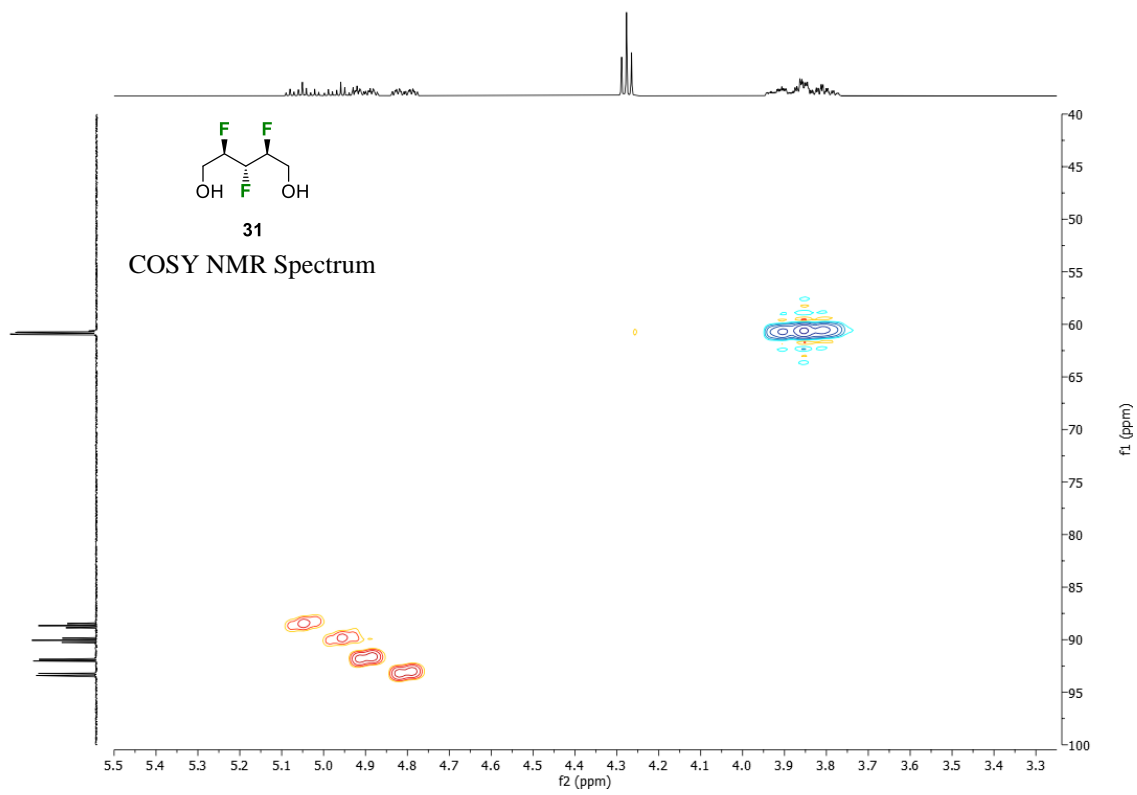



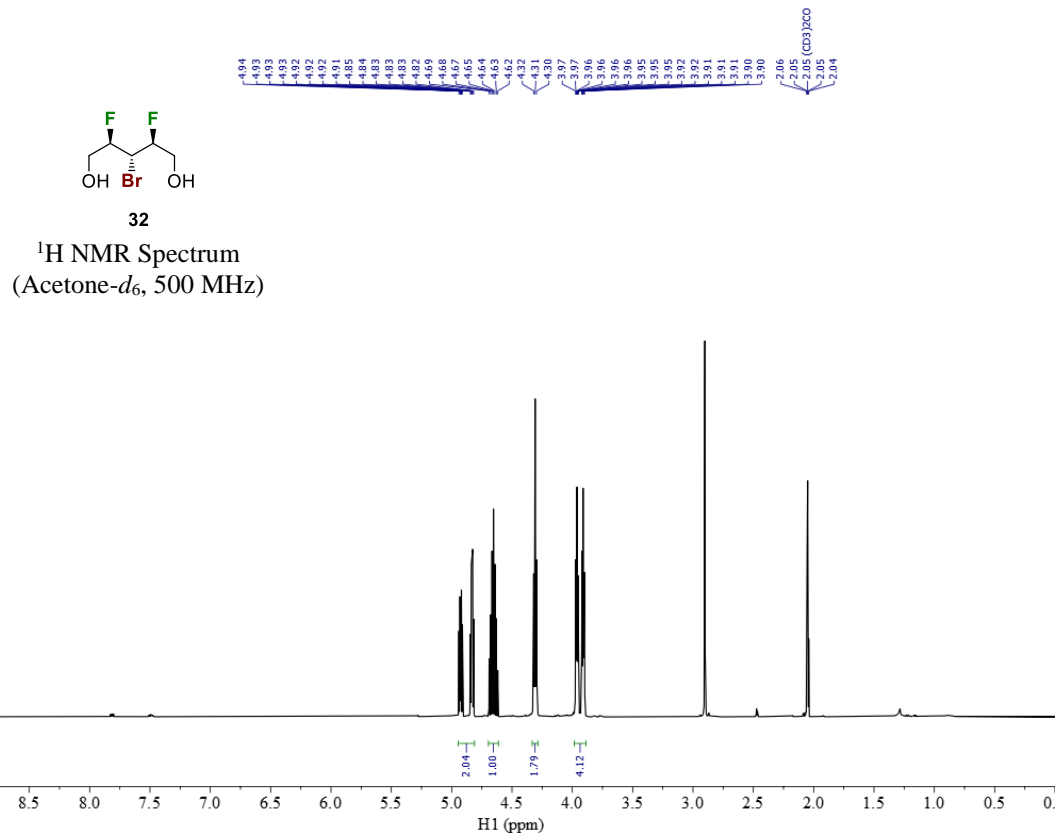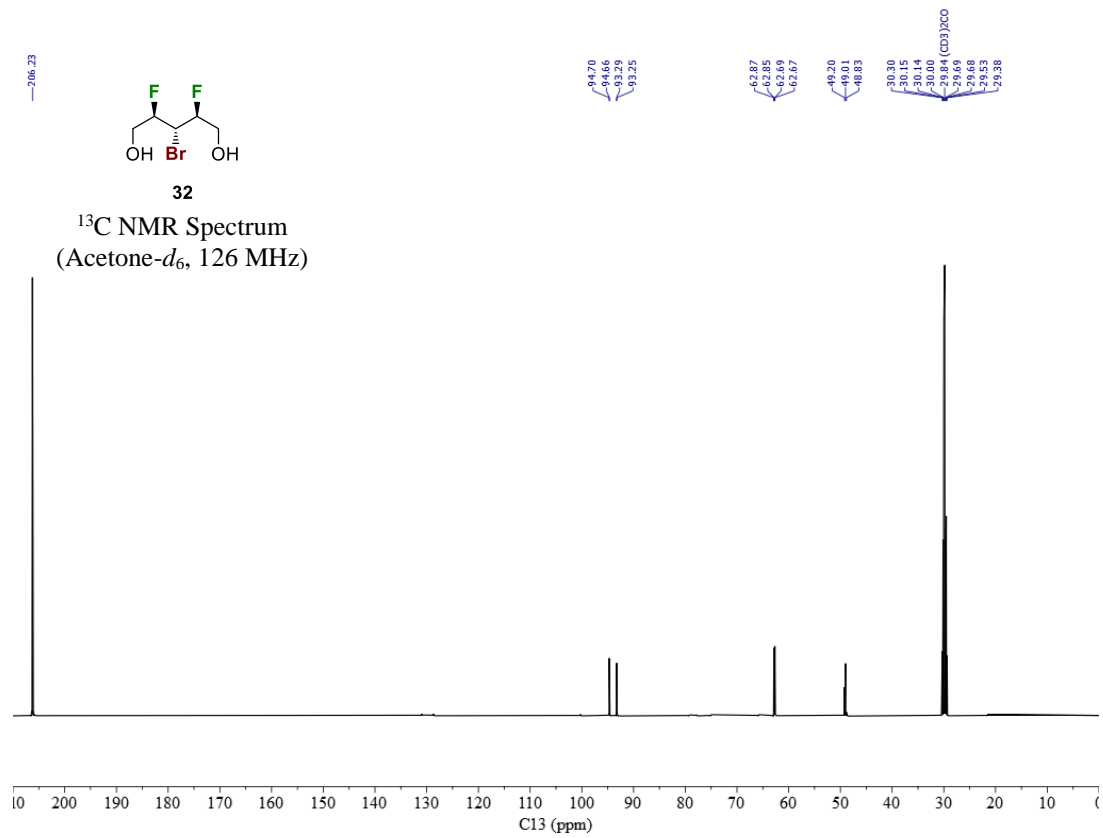

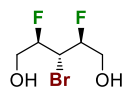

32

<sup>19</sup>F NMR Spectrum  
(Acetone-d<sub>6</sub>, 470 MHz)

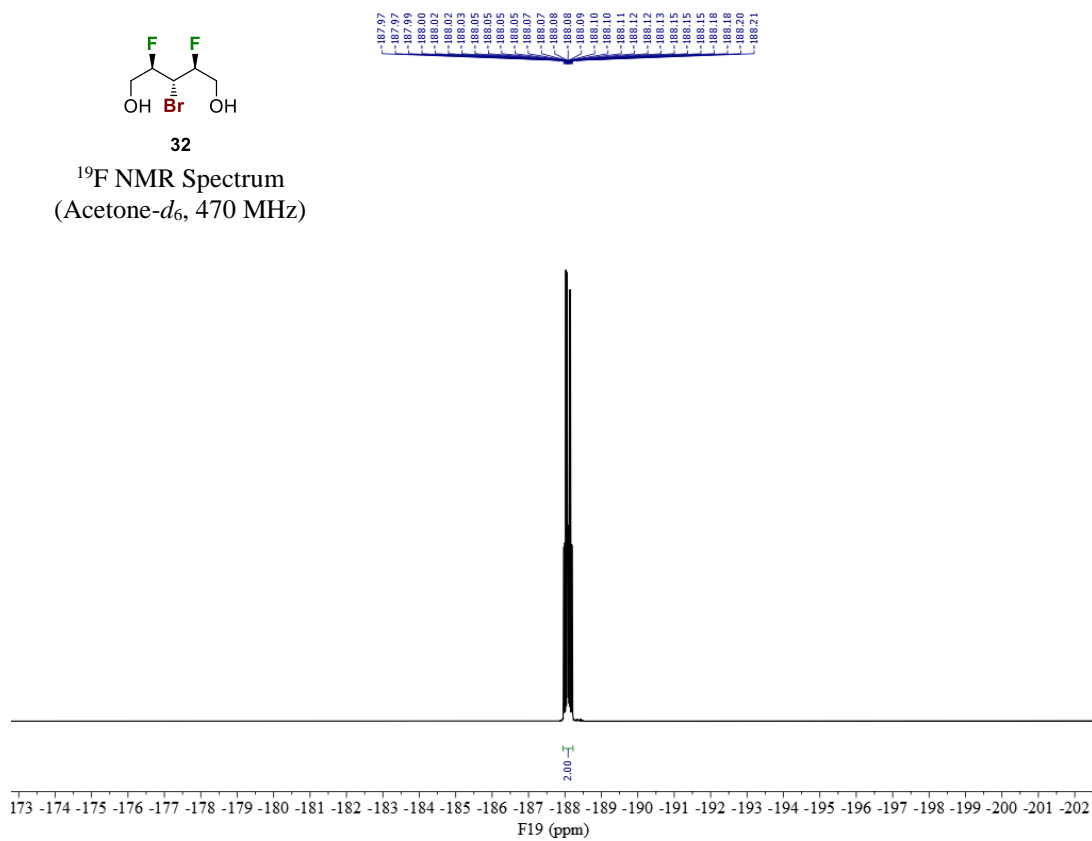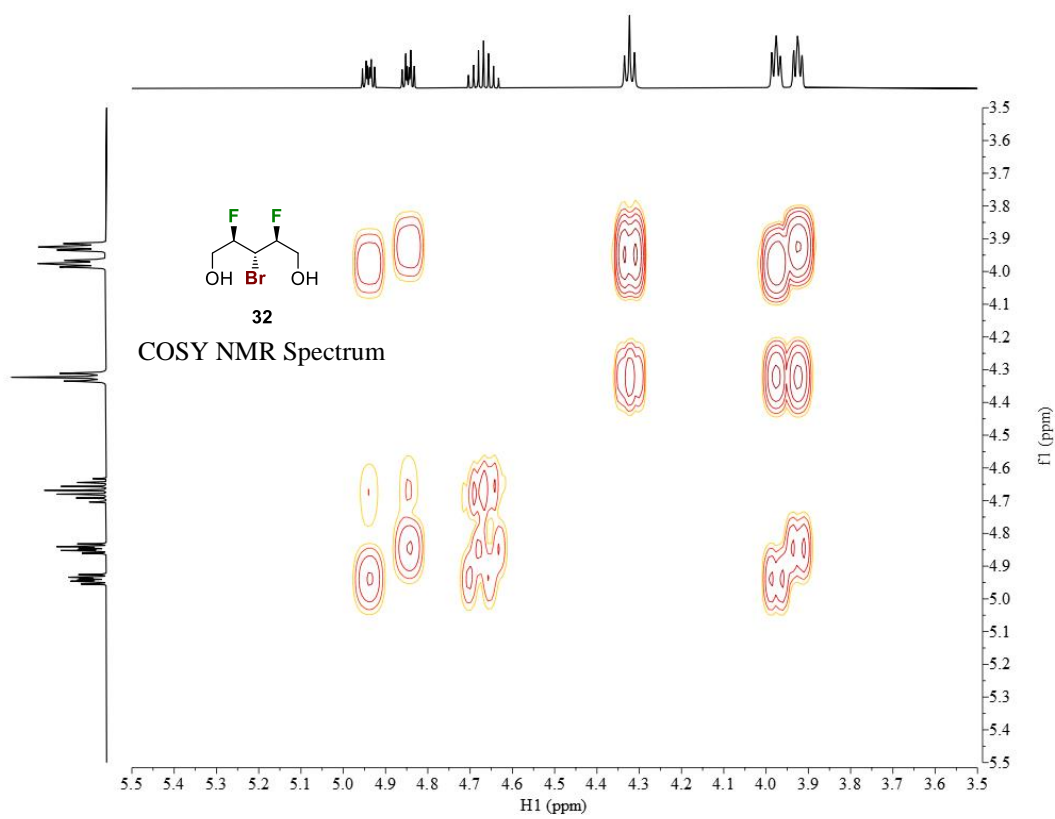

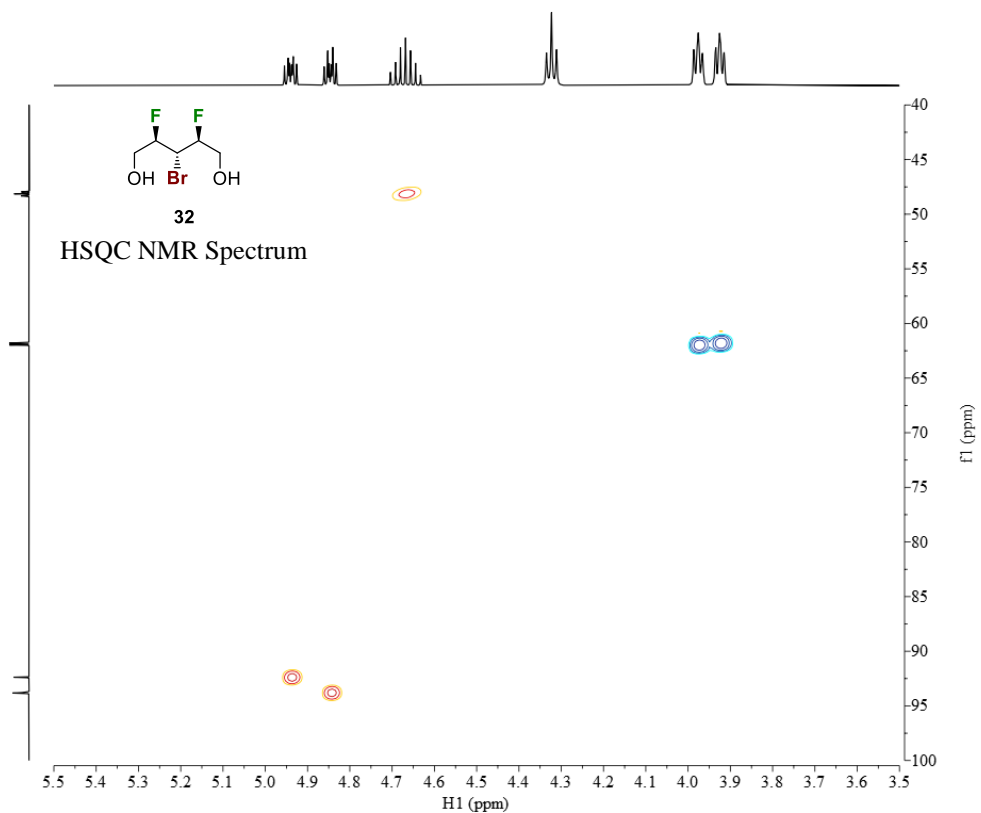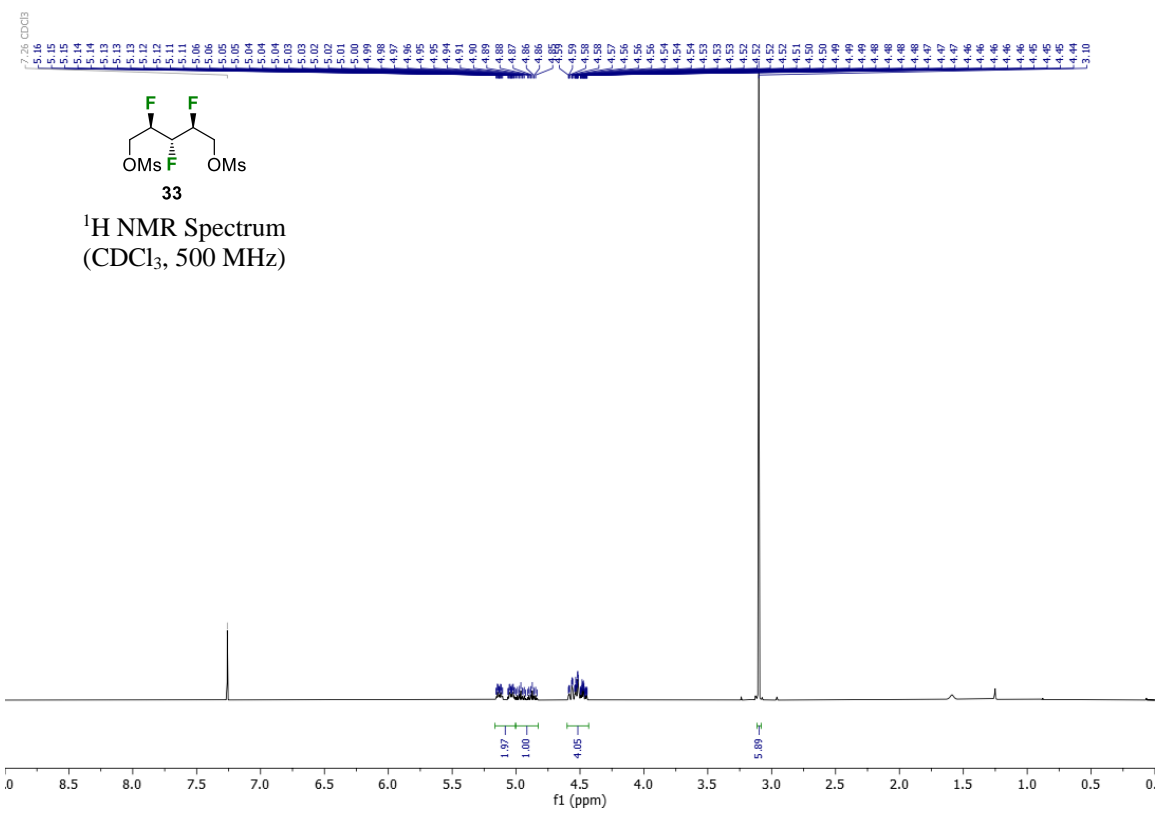



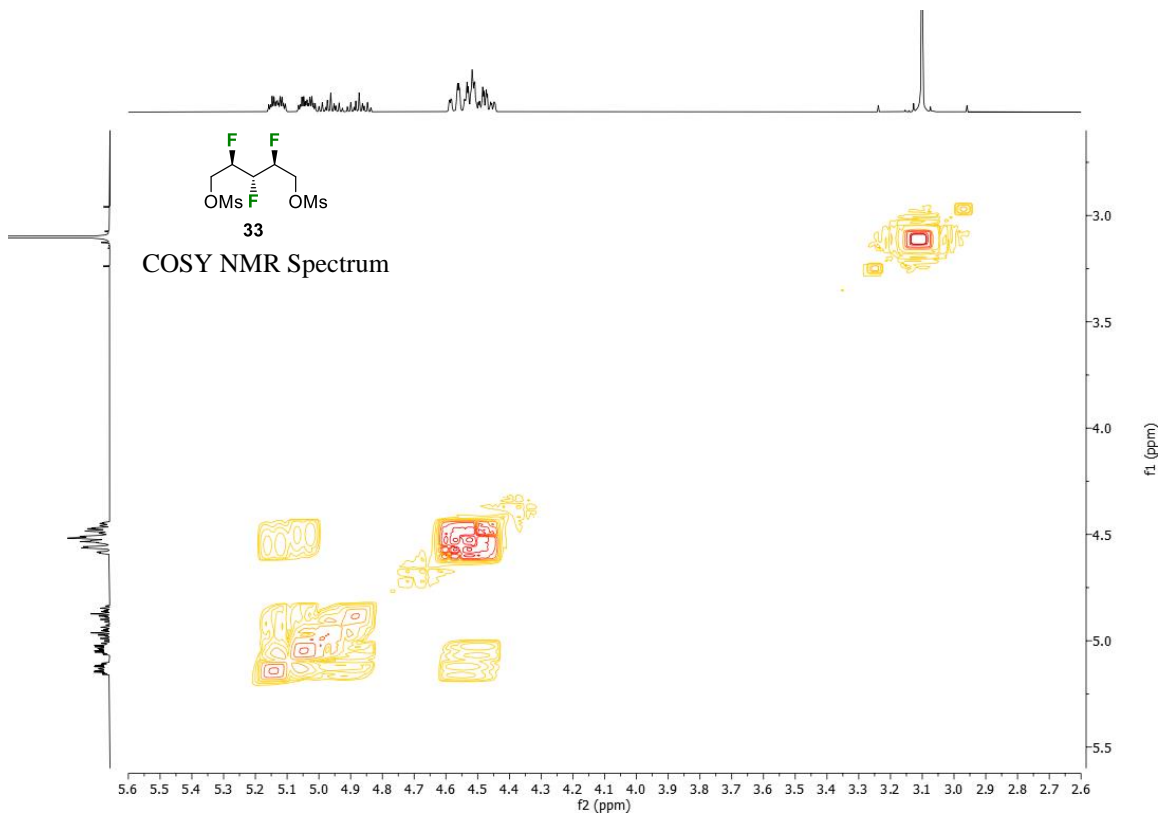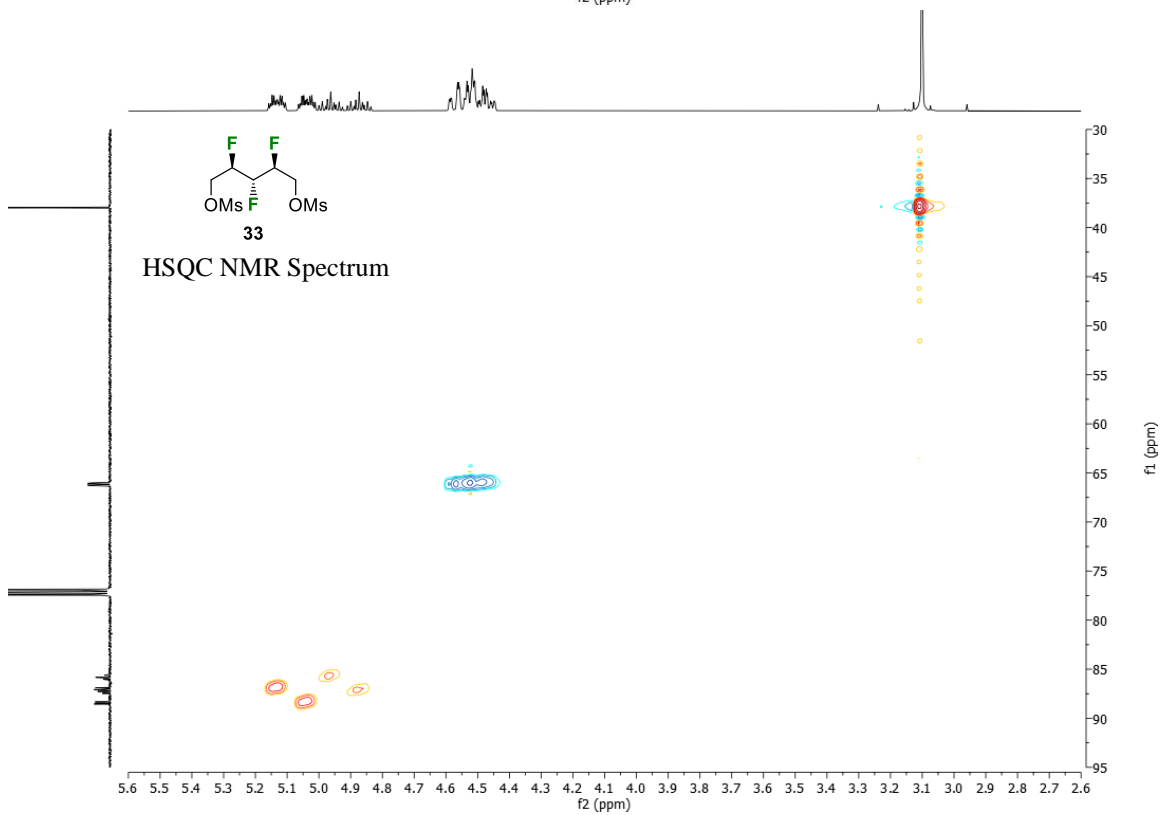

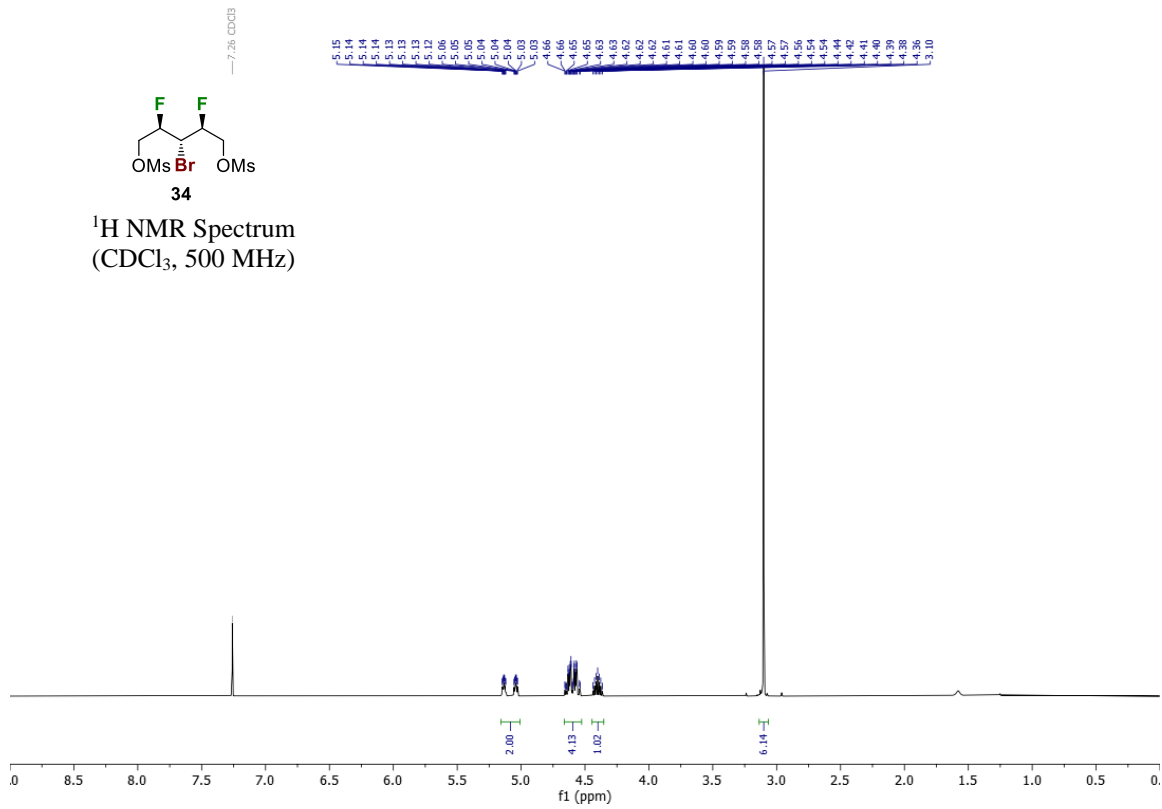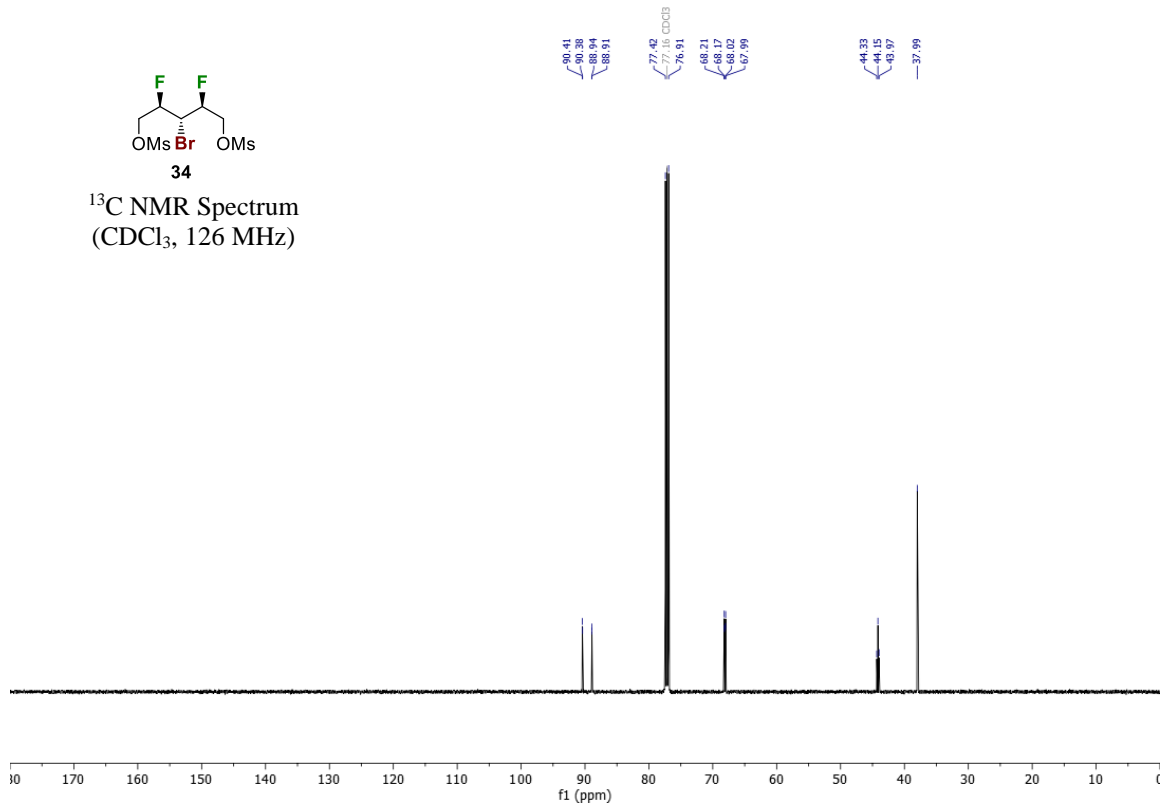

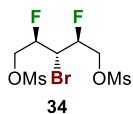

<sup>19</sup>F NMR Spectrum  
(CDCl<sub>3</sub>, 470 MHz)

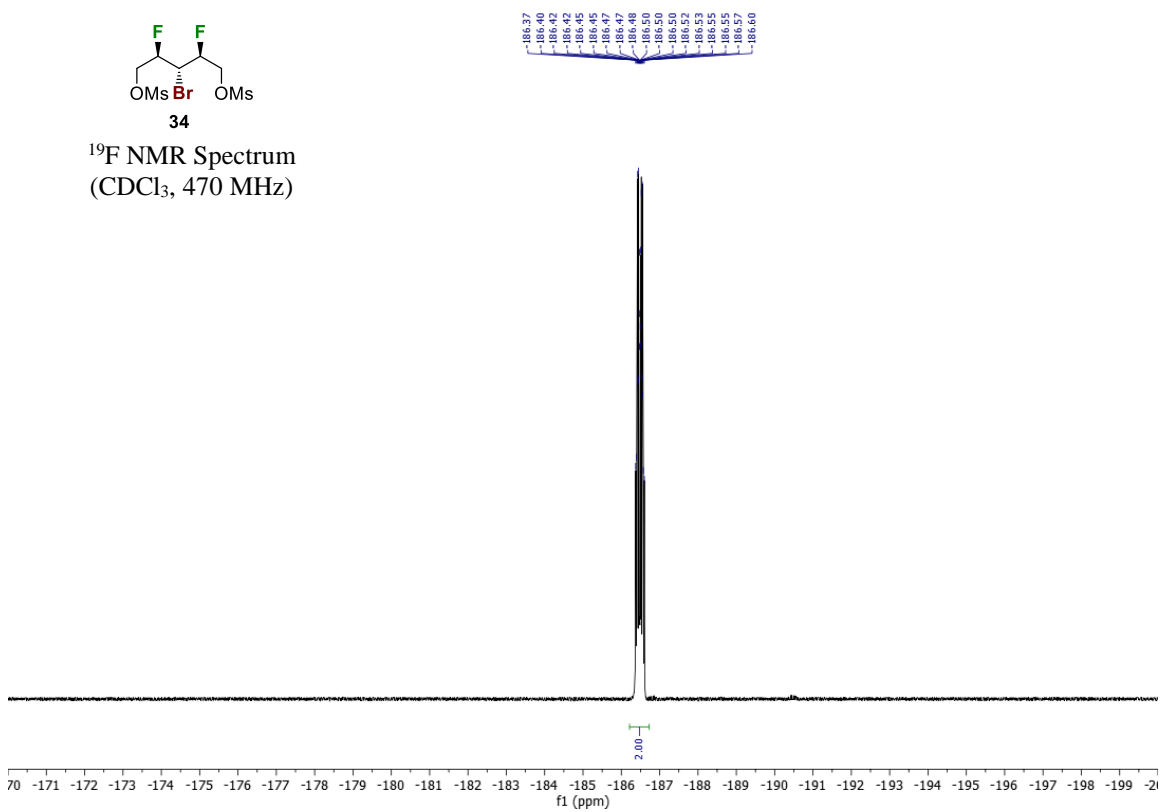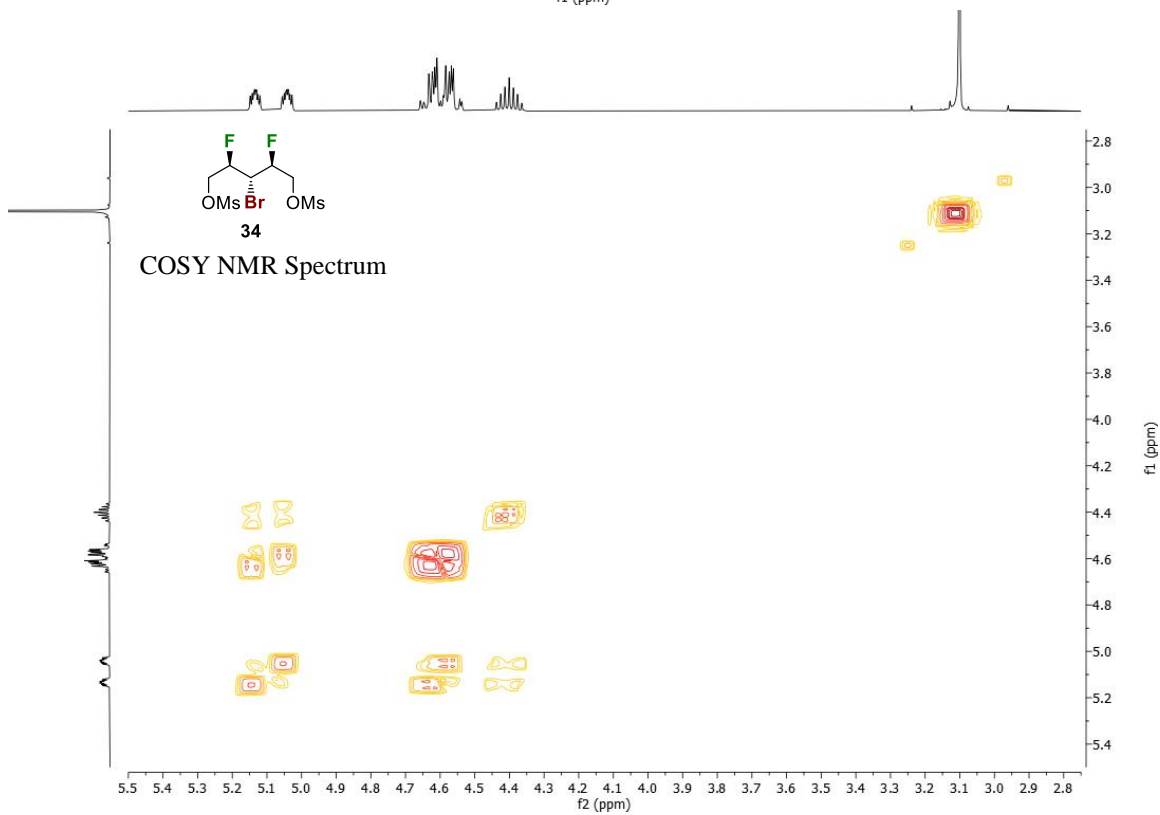

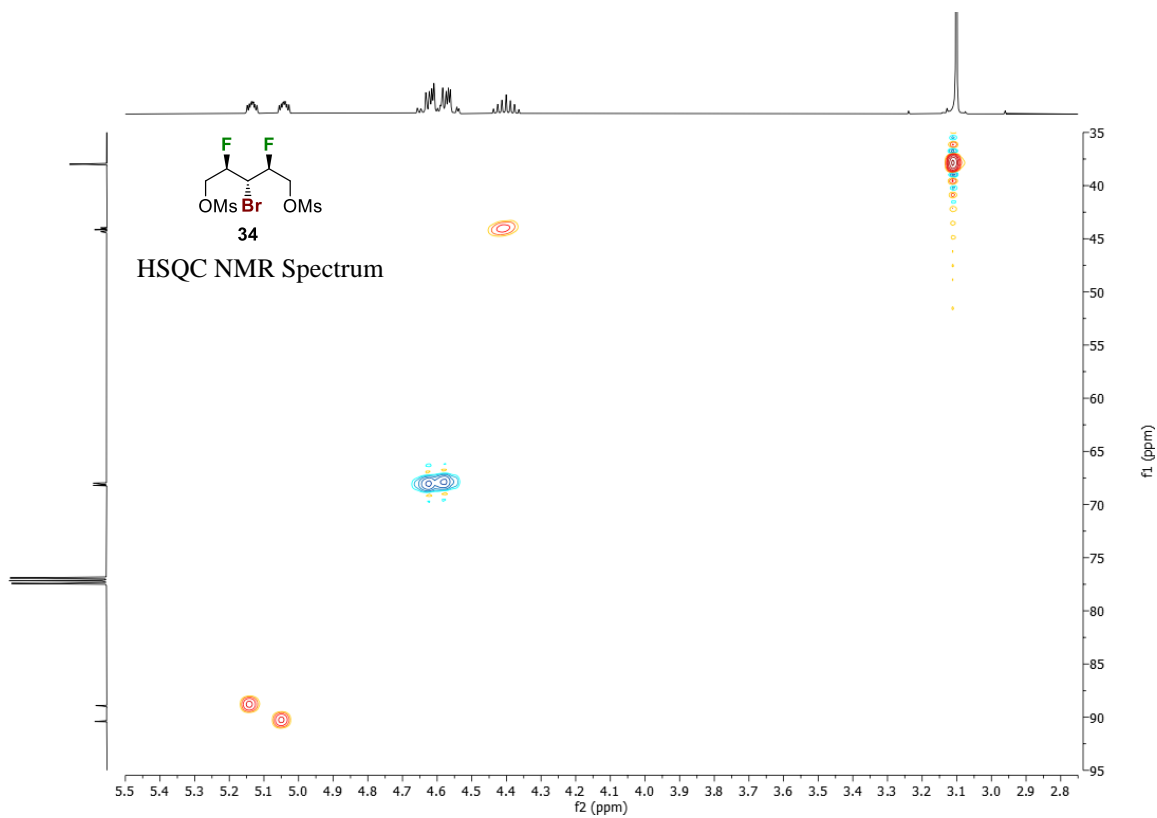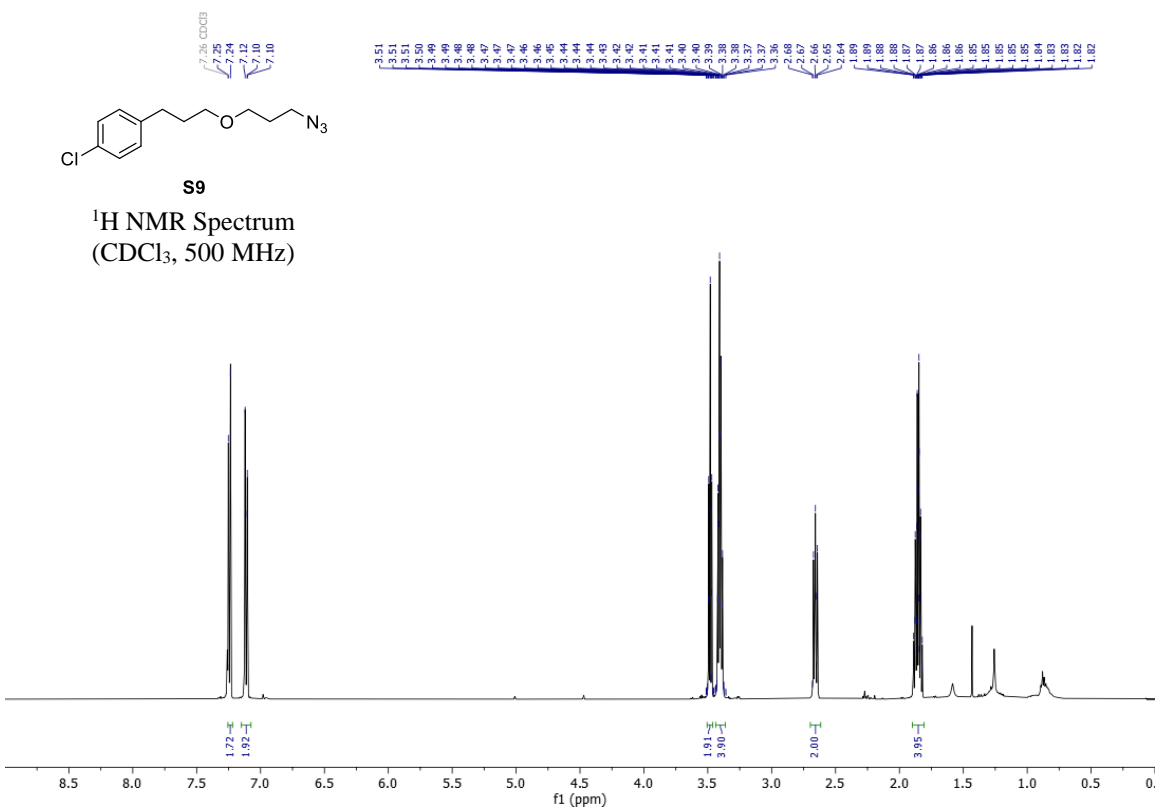



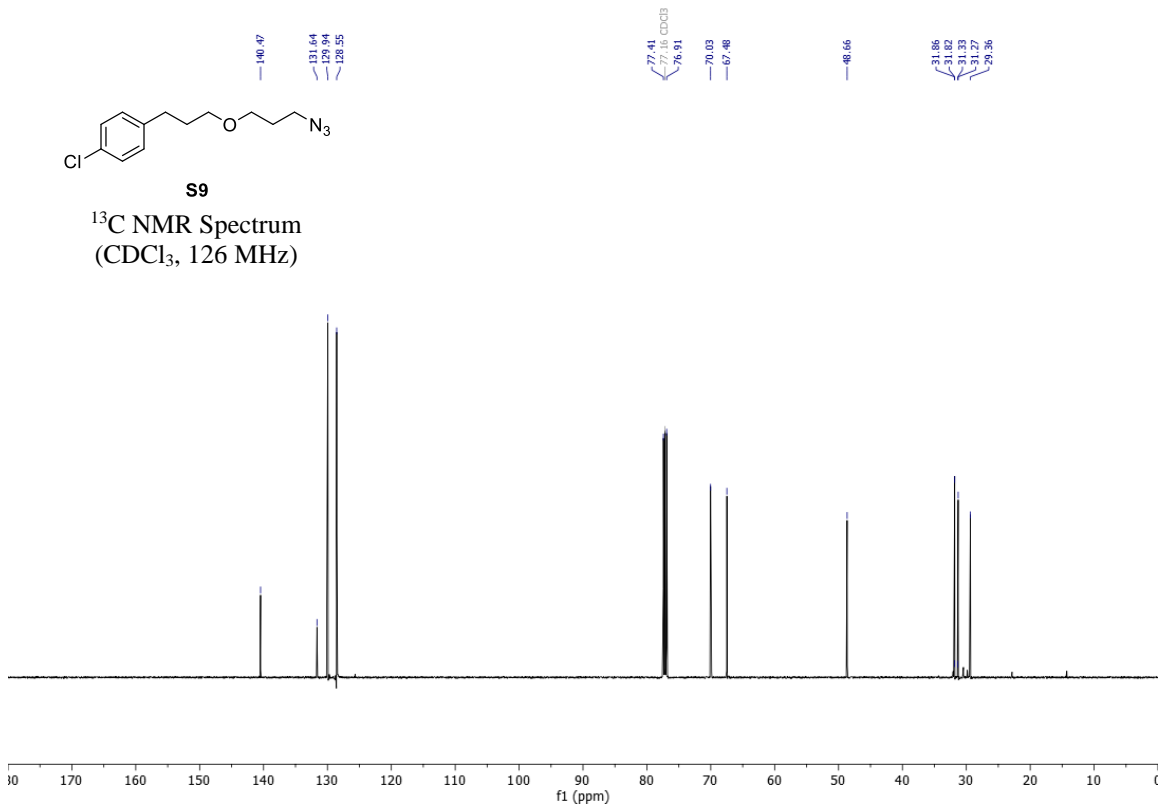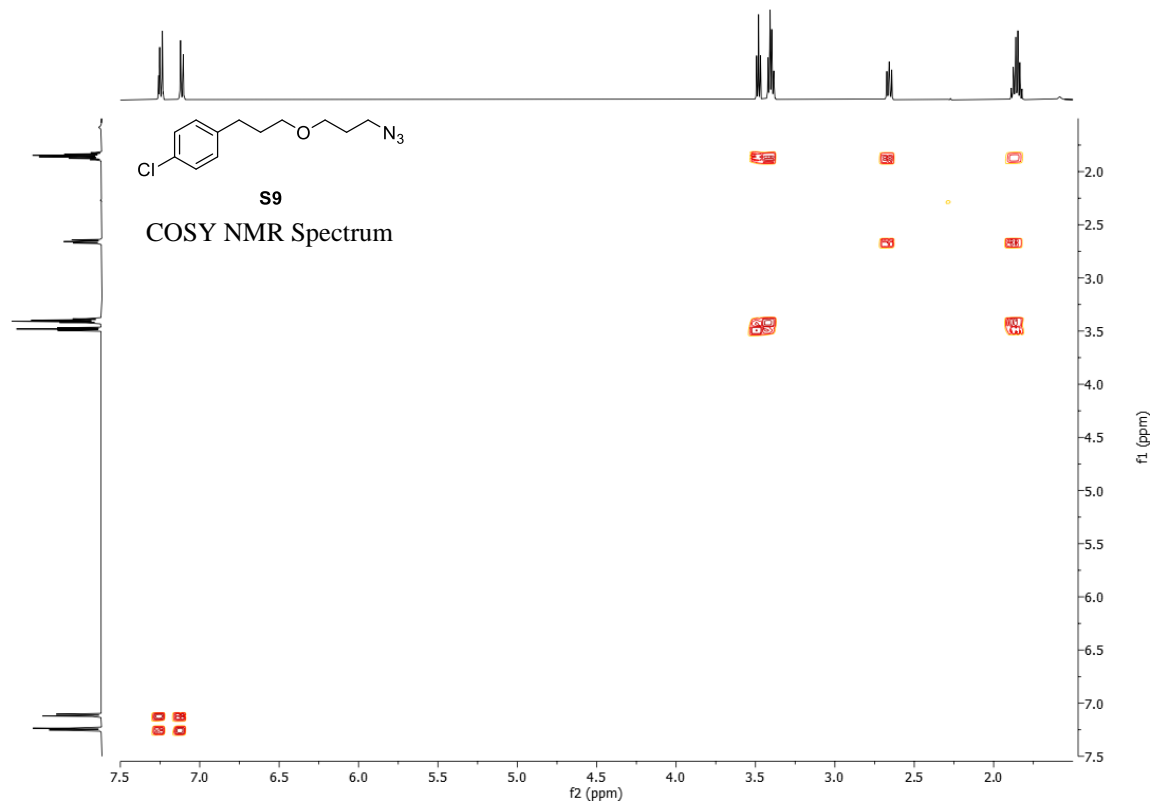

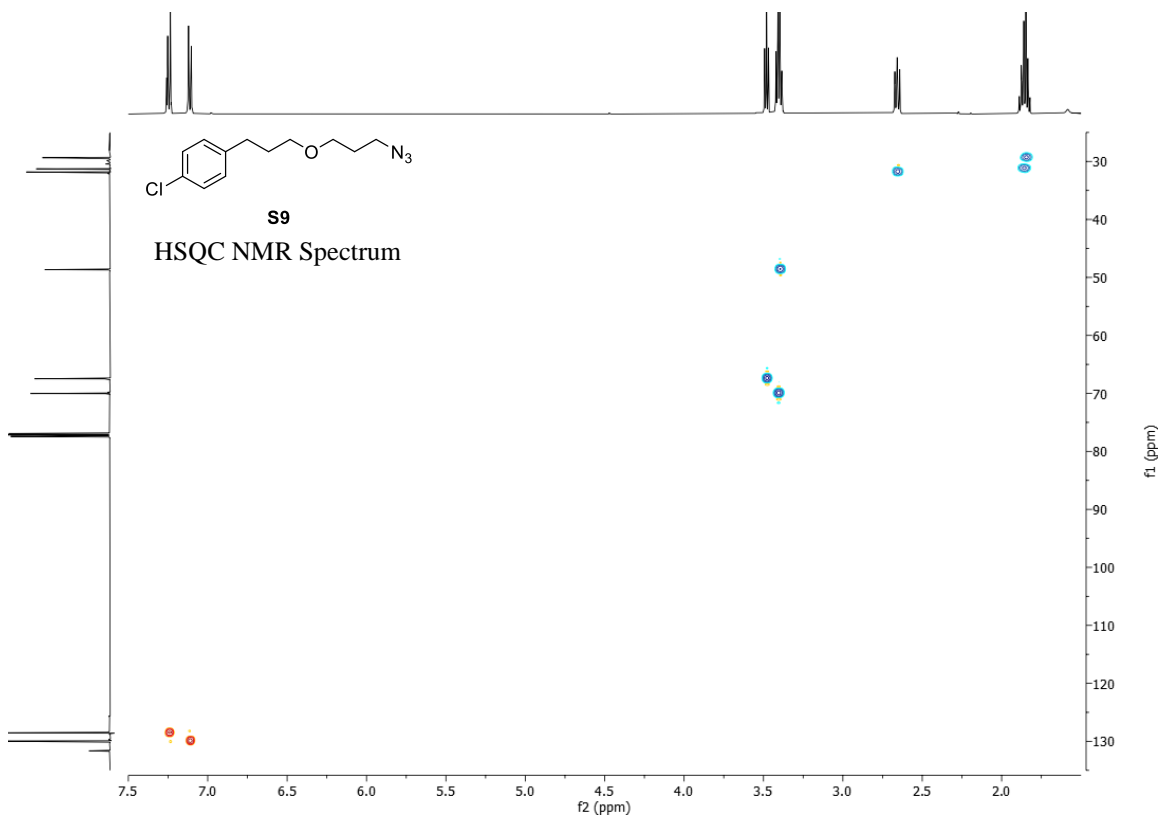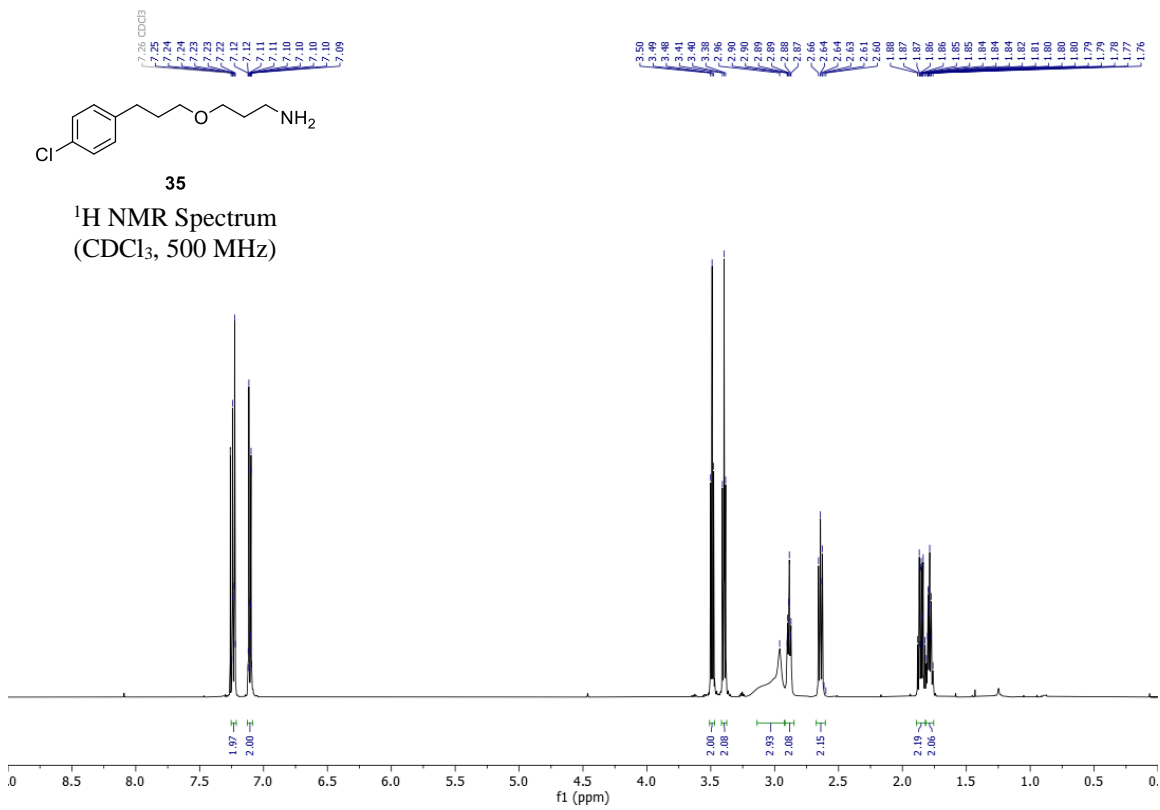



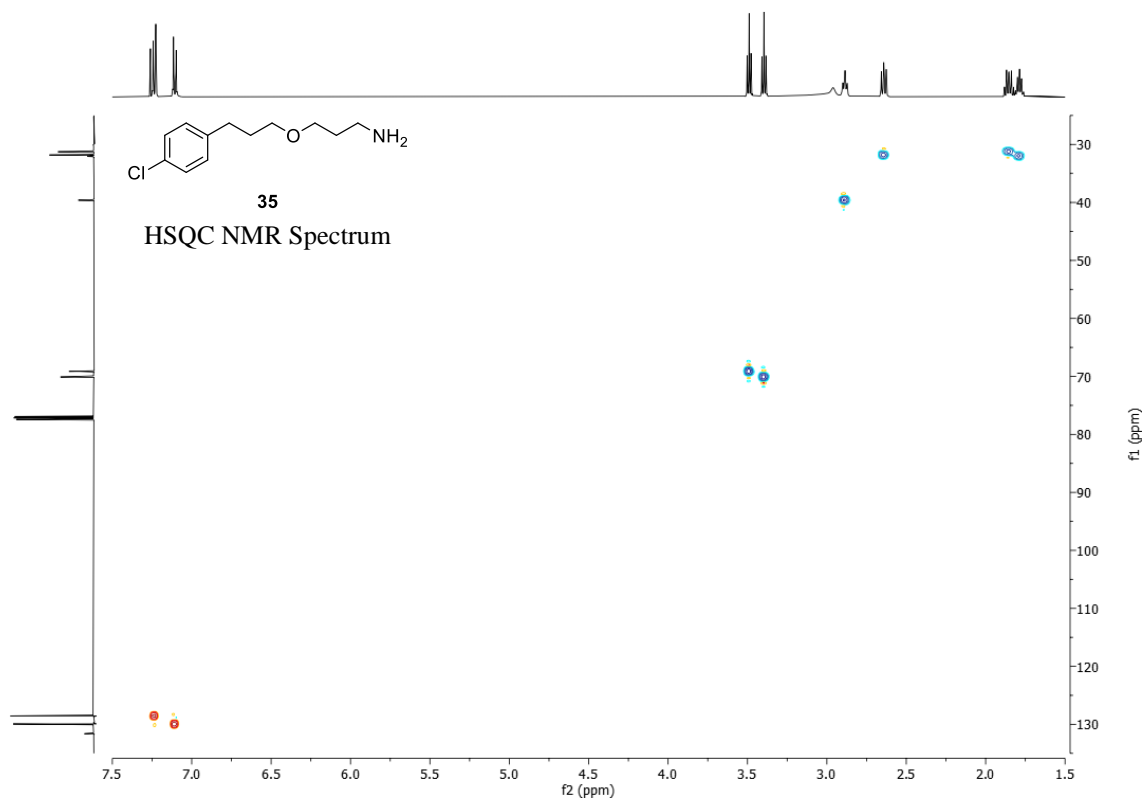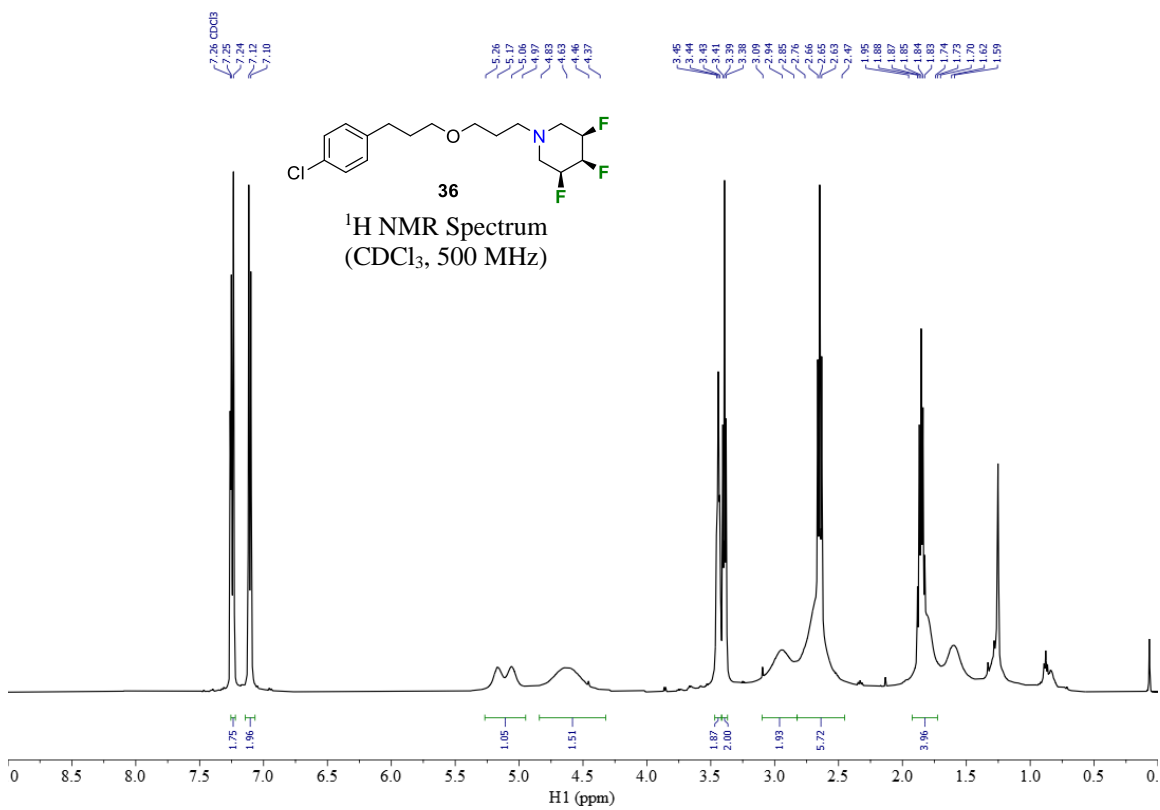

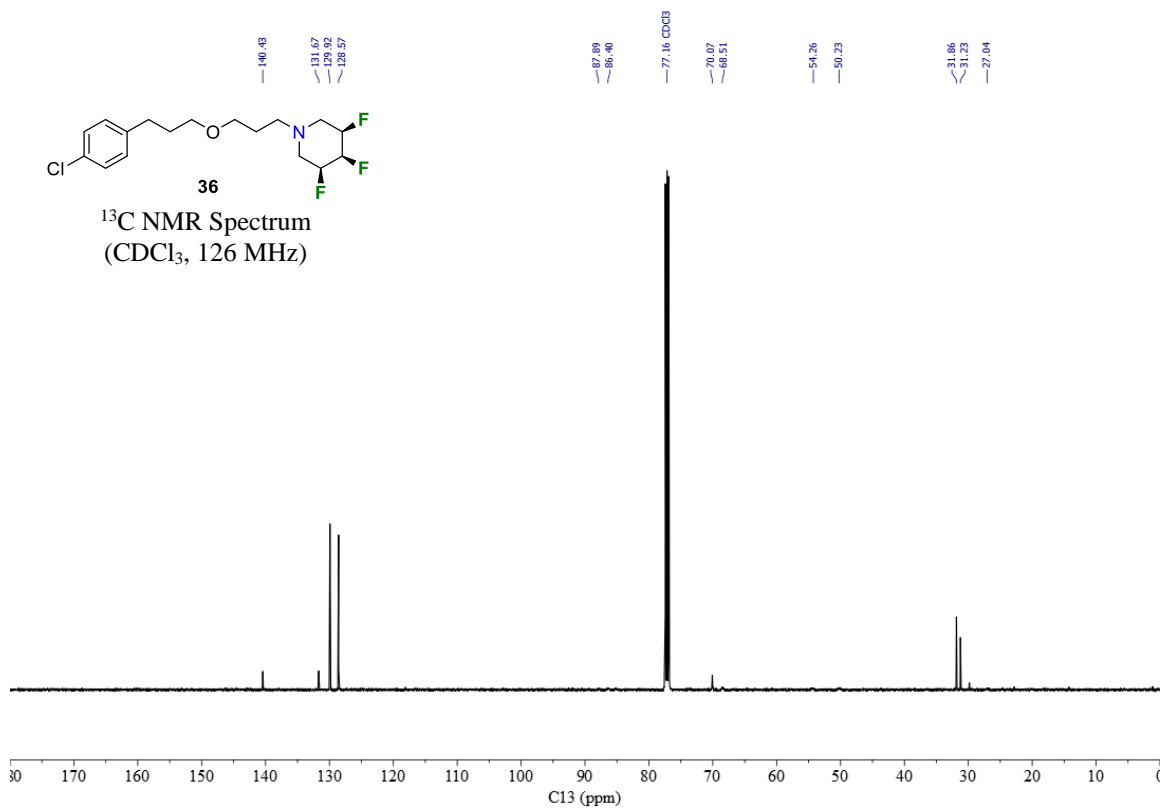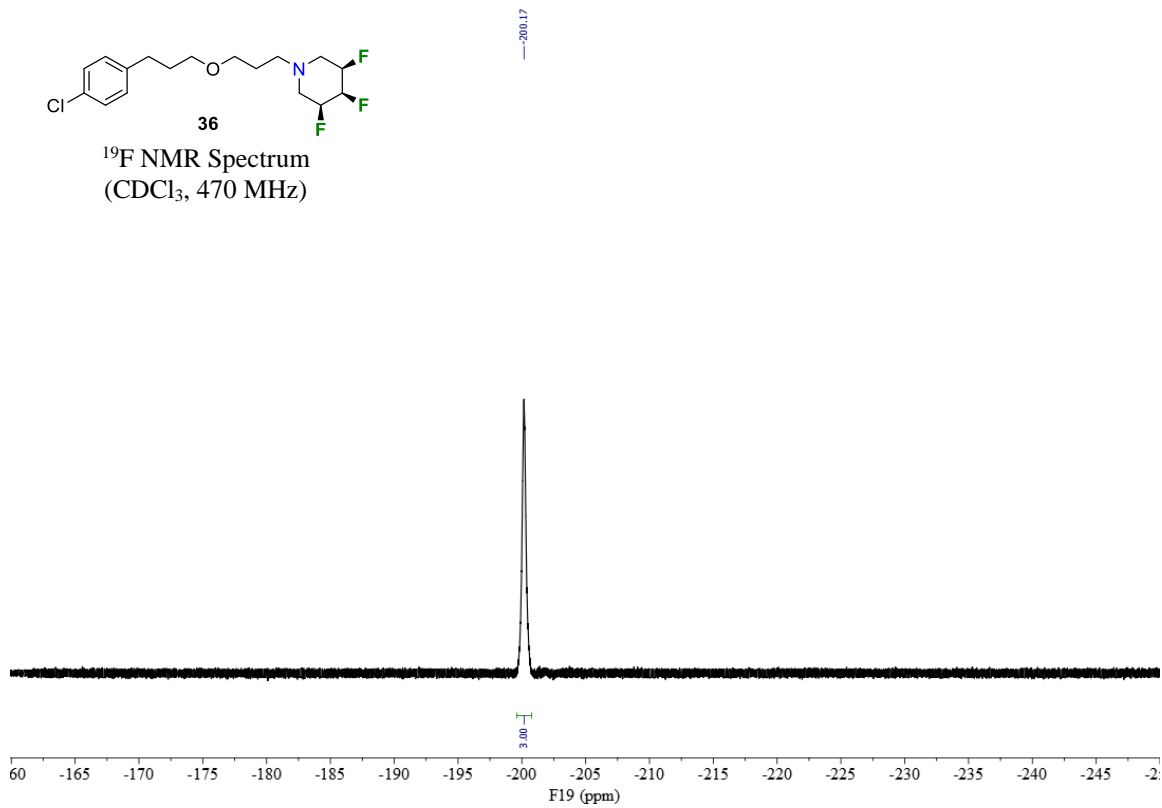

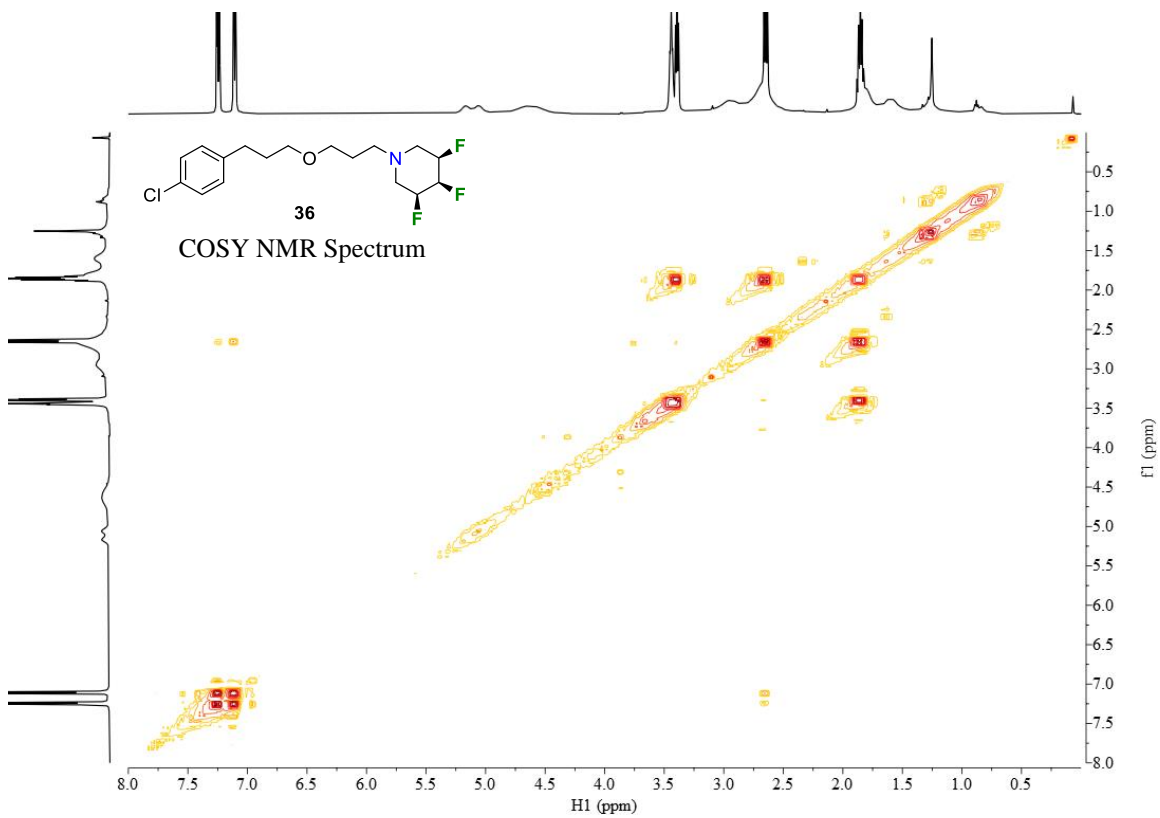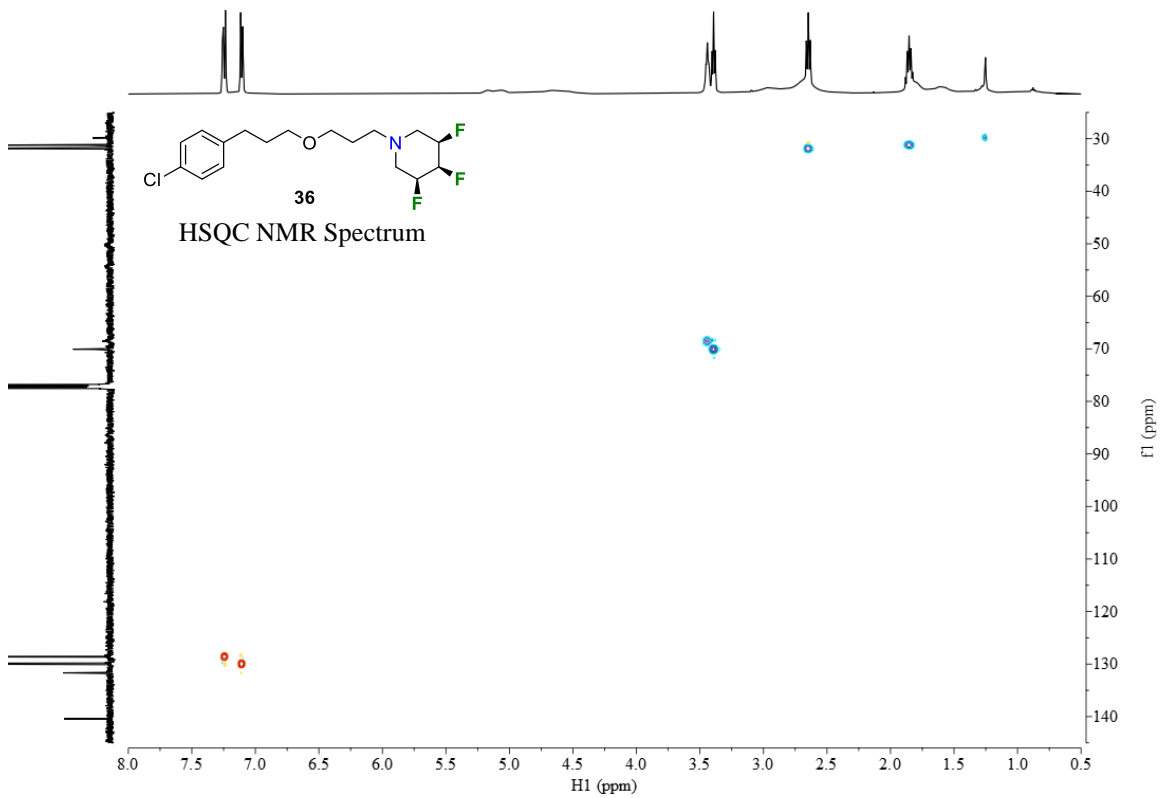



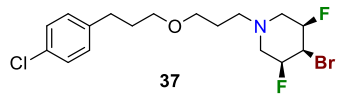

<sup>19</sup>F NMR Spectrum  
(CDCl<sub>3</sub>, 470 MHz)

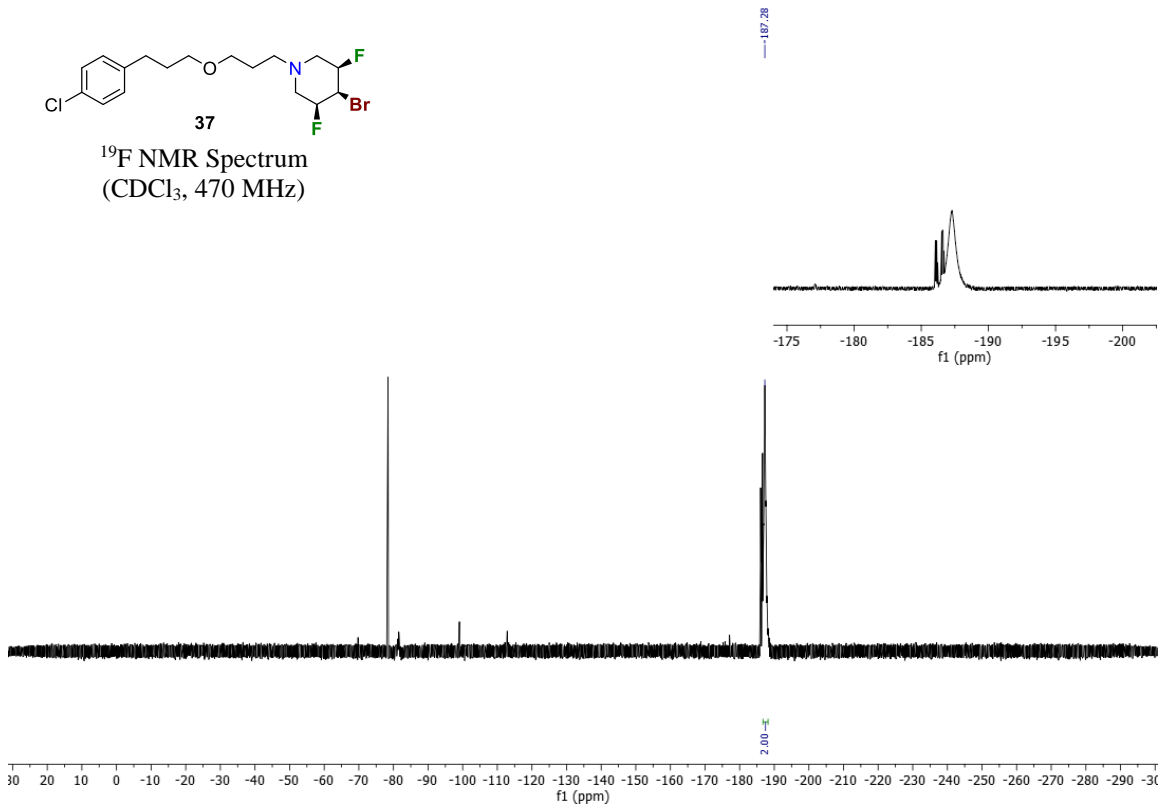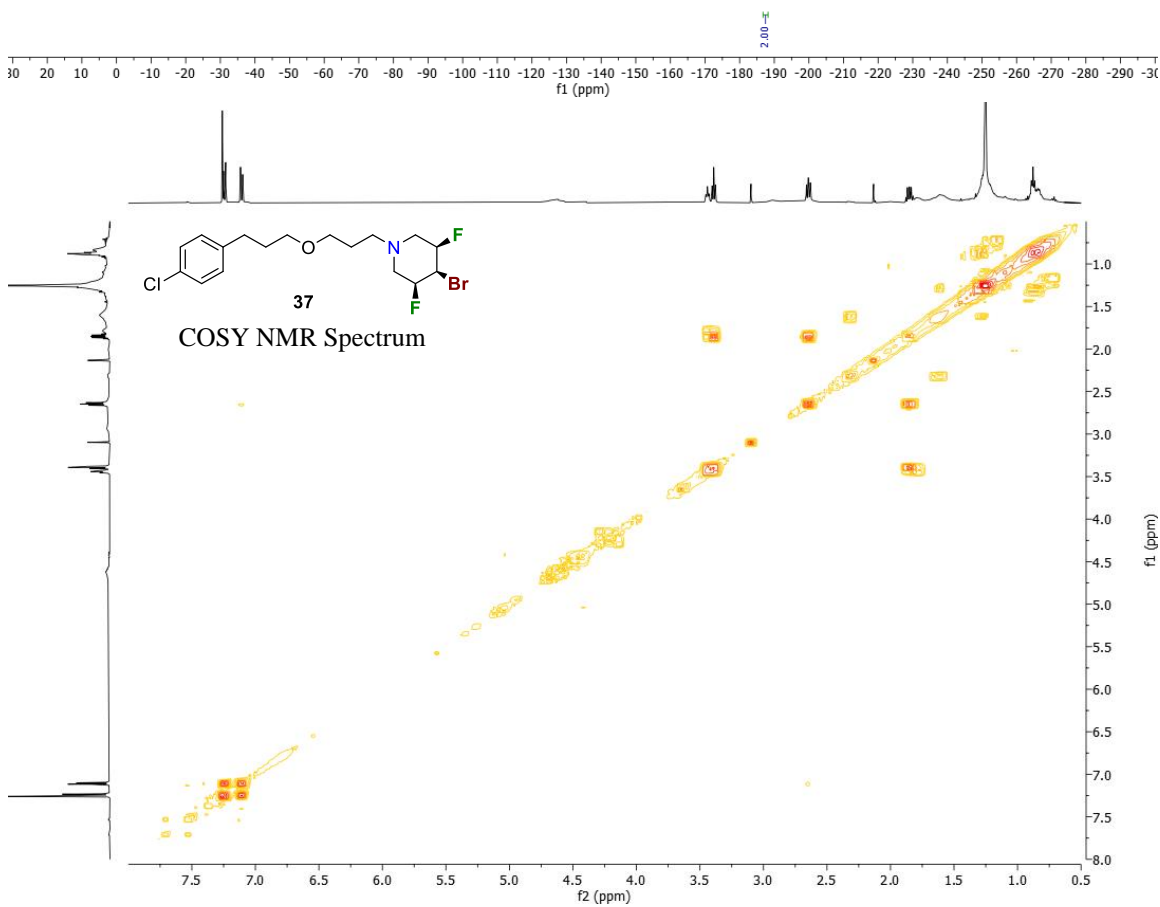



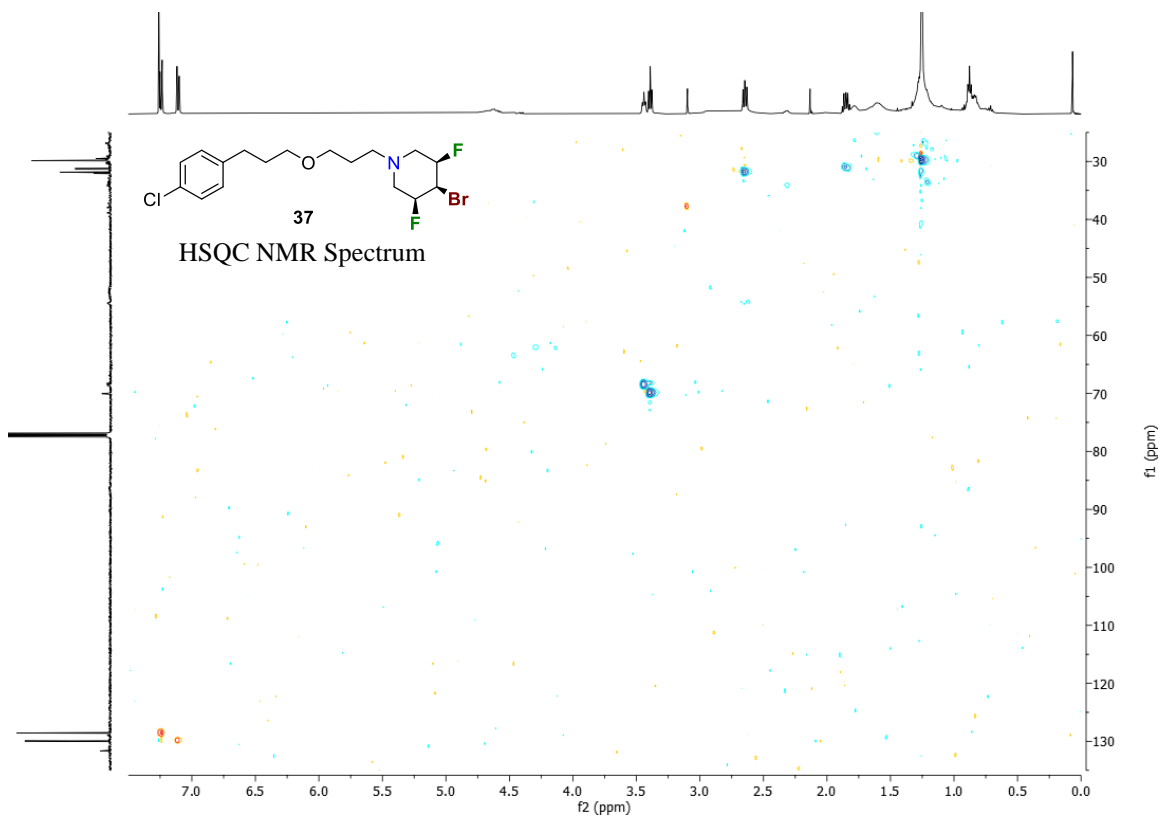

## IV. Solution-state conformation

**Figure S1.** Solution state conformation of compound **15** in acetone-*d*<sub>6</sub>

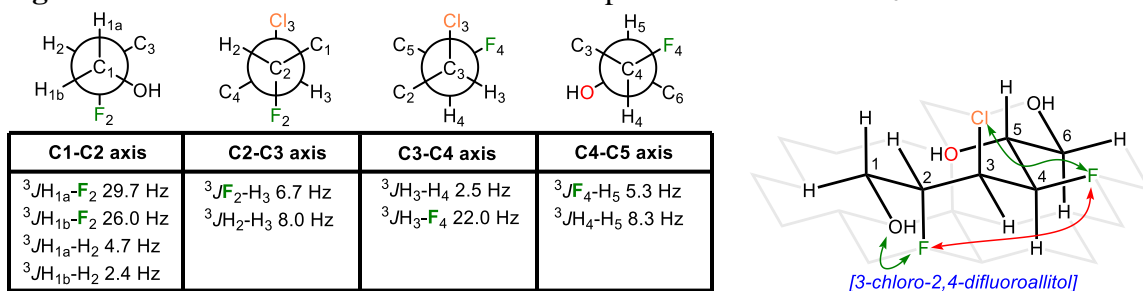

**Figure S2.** Solution state conformation of compound **16** in acetone-*d*<sub>6</sub>

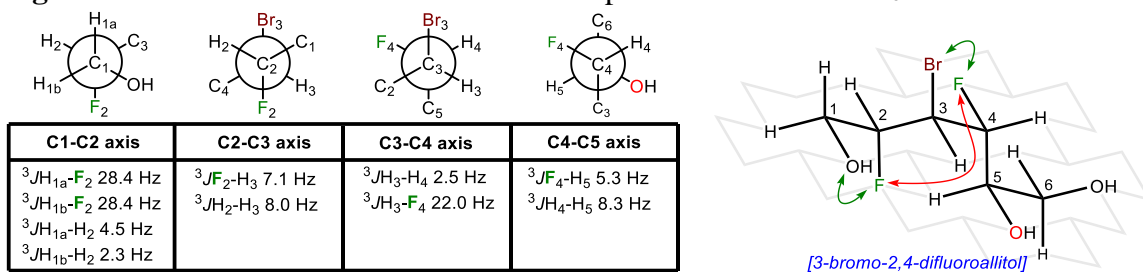

**Figure S3.** Solution state conformation of compound **17** in acetone-*d*<sub>6</sub>

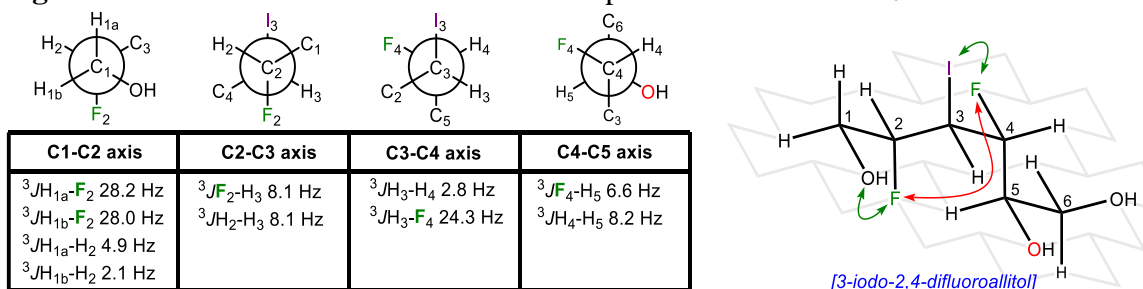

**Figure S4.** Solution state conformation of compound **18** in acetone-*d*<sub>6</sub>

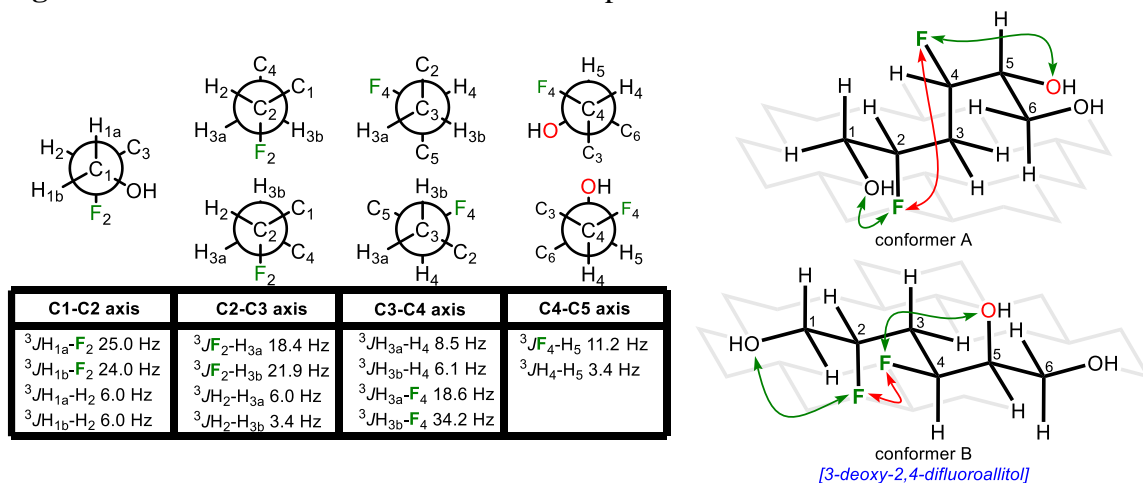

**Table S3.** Thermochemistry for conformers of molecule **18** in vacuum (B3LYP/6-311+G\*)

| Conformer | Energy<br>(Ha) | Enthalpy<br>(Ha) | Gibbs' Free<br>Energy<br>(Ha) | Dipole moment<br>(D) |           |         |         |
|-----------|----------------|------------------|-------------------------------|----------------------|-----------|---------|---------|
|           |                |                  |                               | X                    | Y         | Z       | Total   |
| <b>A</b>  | -661.185974    | -661.185029      | -661.238574                   | -0.898225            | -1.111111 | 1.02895 | 1.76072 |
| <b>B</b>  | -661.181079    | -661.180134      | -661.233960                   | 0.820353             | 1.20611   | 2.87256 | 3.19769 |

**Table S4.** Optimized geometry of conformer A in vacuum (B3LYP/6-311+G\*)

| Center<br>Number | Atomic<br>Number | Atomic<br>Type | Coordinates<br>(Å) |              |              |
|------------------|------------------|----------------|--------------------|--------------|--------------|
|                  |                  |                | X                  | Y            | Z            |
| <b>1</b>         | 6                | 0              | -2.739324000       | -0.556899000 | 0.080528000  |
| <b>2</b>         | 1                | 0              | -2.485386000       | -0.900462000 | -0.920834000 |
| <b>3</b>         | 1                | 0              | -2.553508000       | -1.388229000 | 0.774312000  |
| <b>4</b>         | 6                | 0              | -1.854185000       | 0.617749000  | 0.477744000  |
| <b>5</b>         | 1                | 0              | -2.261887000       | 1.082257000  | 1.384395000  |
| <b>6</b>         | 6                | 0              | -0.378090000       | 0.304442000  | 0.719134000  |
| <b>7</b>         | 1                | 0              | 0.095557000        | 1.232021000  | 1.054503000  |
| <b>8</b>         | 1                | 0              | -0.276497000       | -0.409589000 | 1.541262000  |
| <b>9</b>         | 6                | 0              | 0.383988000        | -0.206614000 | -0.492493000 |
| <b>10</b>        | 1                | 0              | 0.178749000        | 0.408501000  | -1.372543000 |
| <b>11</b>        | 6                | 0              | 1.893323000        | -0.358928000 | -0.311596000 |
| <b>12</b>        | 1                | 0              | 2.285016000        | -0.805233000 | -1.234682000 |
| <b>13</b>        | 6                | 0              | 2.645011000        | 0.945311000  | -0.067485000 |
| <b>14</b>        | 1                | 0              | 2.444690000        | 1.658246000  | -0.869951000 |
| <b>15</b>        | 1                | 0              | 2.319621000        | 1.392590000  | 0.880618000  |
| <b>16</b>        | 8                | 0              | -4.117589000       | -0.219417000 | 0.036300000  |
| <b>17</b>        | 1                | 0              | -4.430396000       | 0.001750000  | 0.921969000  |
| <b>18</b>        | 9                | 0              | -1.932793000       | 1.610289000  | -0.520346000 |
| <b>19</b>        | 9                | 0              | -0.096350000       | -1.509817000 | -0.810500000 |
| <b>20</b>        | 8                | 0              | 2.207912000        | -1.206740000 | 0.797030000  |
| <b>21</b>        | 1                | 0              | 1.935037000        | -2.109133000 | 0.592271000  |
| <b>22</b>        | 8                | 0              | 4.044527000        | 0.729078000  | -0.058558000 |
| <b>23</b>        | 1                | 0              | 4.228136000        | 0.039305000  | 0.593135000  |

**Table S5.** Optimized geometry of conformer B in vacuum (B3LYP/6-311+G\*)

| Center Number | Atomic Number | Atomic Type | Coordinates (Å) |              |              |
|---------------|---------------|-------------|-----------------|--------------|--------------|
|               |               |             | X               | Y            | Z            |
| 1             | 6             | 0           | -2.739324000    | -0.556899000 | 0.080528000  |
| 2             | 1             | 0           | -2.485386000    | -0.900462000 | -0.920834000 |
| 3             | 1             | 0           | -2.553508000    | -1.388229000 | 0.774312000  |
| 4             | 6             | 0           | -1.854185000    | 0.617749000  | 0.477744000  |
| 5             | 1             | 0           | -2.261887000    | 1.082257000  | 1.384395000  |
| 6             | 6             | 0           | -0.378090000    | 0.304442000  | 0.719134000  |
| 7             | 1             | 0           | 0.095557000     | 1.232021000  | 1.054503000  |
| 8             | 1             | 0           | -0.276497000    | -0.409589000 | 1.541262000  |
| 9             | 6             | 0           | 0.383988000     | -0.206614000 | -0.492493000 |
| 10            | 1             | 0           | 0.178749000     | 0.408501000  | -1.372543000 |
| 11            | 6             | 0           | 1.893323000     | -0.358928000 | -0.311596000 |
| 12            | 1             | 0           | 2.285016000     | -0.805233000 | -1.234682000 |
| 13            | 6             | 0           | 2.645011000     | 0.945311000  | -0.067485000 |
| 14            | 1             | 0           | 2.444690000     | 1.658246000  | -0.869951000 |
| 15            | 1             | 0           | 2.319621000     | 1.392590000  | 0.880618000  |
| 16            | 8             | 0           | -4.117589000    | -0.219417000 | 0.036300000  |
| 17            | 1             | 0           | -4.430396000    | 0.001750000  | 0.921969000  |
| 18            | 9             | 0           | -1.932793000    | 1.610289000  | -0.520346000 |
| 19            | 9             | 0           | -0.096350000    | -1.509817000 | -0.810500000 |
| 20            | 8             | 0           | 2.207912000     | -1.206740000 | 0.797030000  |
| 21            | 1             | 0           | 1.935037000     | -2.109133000 | 0.592271000  |
| 22            | 8             | 0           | 4.044527000     | 0.729078000  | -0.058558000 |
| 23            | 1             | 0           | 4.228136000     | 0.039305000  | 0.593135000  |

**Figure S5.** Solution state conformation of compound **24** in acetone-*d*<sub>6</sub>

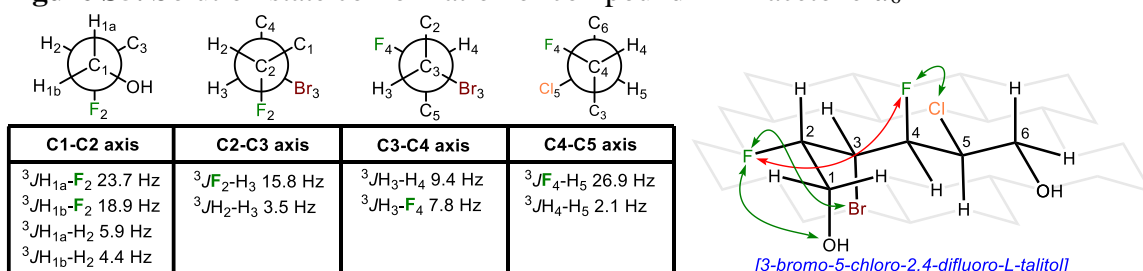

**Figure S6.** Solution state conformation of compound **26** in acetone- $d_6$

| C1-C2 axis                 | C2-C3 axis              | C3-C4 axis             | C4-C5 axis              |
|----------------------------|-------------------------|------------------------|-------------------------|
| $^3J_{H_{1a}-F_2}$ 24.0 Hz | $^3J_{F_2-H_3}$ 16.0 Hz | $^3J_{H_3-H_4}$ 9.4 Hz | $^3J_{F_4-H_5}$ 28.2 Hz |
| $^3J_{H_{1b}-F_2}$ 19.5 Hz | $^3J_{H_2-H_3}$ 3.4 Hz  | $^3J_{H_3-F_4}$ 7.5 Hz | $^3J_{H_4-H_5}$ 2.0 Hz  |
| $^3J_{H_{1a}-H_2}$ 4.4 Hz  |                         |                        |                         |
| $^3J_{H_{1b}-H_2}$ 6.2 Hz  |                         |                        |                         |

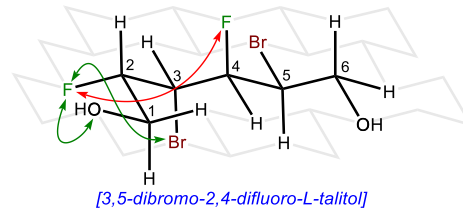

**Figure S7.** Solution state conformation of compound **28** in acetone- $d_6$

| C1-C2 axis                 | C2-C3 axis              | C3-C4 axis             | C4-C5 axis              |
|----------------------------|-------------------------|------------------------|-------------------------|
| $^3J_{H_{1a}-F_2}$ 23.5 Hz | $^3J_{F_2-H_3}$ 15.8 Hz | $^3J_{H_3-H_4}$ 9.5 Hz | $^3J_{F_4-H_5}$ 31.0 Hz |
| $^3J_{H_{1b}-F_2}$ 20.0 Hz | $^3J_{H_2-H_3}$ 3.1 Hz  | $^3J_{H_3-F_4}$ 7.5 Hz | $^3J_{H_4-H_5}$ 1.9 Hz  |
| $^3J_{H_{1a}-H_2}$ 4.4 Hz  |                         |                        |                         |
| $^3J_{H_{1b}-H_2}$ 6.3 Hz  |                         |                        |                         |

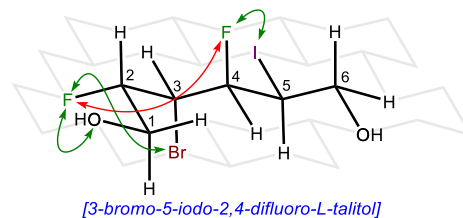

## V. Log *P* determination using <sup>19</sup>F NMR<sup>5</sup>

Equations:

$$\text{Eq. 1) } \rho_{Oct} = \frac{I_{Oct}^X}{I_{Oct}^{ref}} \qquad \rho_{H_2O} = \frac{I_{H_2O}^X}{I_{H_2O}^{ref}}$$

$$\text{Eq. 2) } \frac{\rho_{Oct}}{\rho_{H_2O}} = \frac{P^X}{P^{ref}}$$

$$\text{Eq. 3) } P^X = P^{ref} \left( \frac{\rho_{Oct}}{\rho_{H_2O}} \right)$$

$$\text{Eq. 4) } \log P^X = \log P^{ref} + \log \left( \frac{\rho_{Oct}}{\rho_{H_2O}} \right)$$

$\rho$ : Partition of compound X in the phase; I: Sum of all integration in the phase (ref = 100); *P*: *n*-octanol/H<sub>2</sub>O partition; X: compound with unknown log *P*; ref: 2,2,2-trifluoroethanol (log *P* = 0.36)

| Compounds | $I_{Oct}^X$ | $\rho_{Oct}$ | $I_{H_2O}^X$ | $\rho_{H_2O}$ | $\log P^X$ |
|-----------|-------------|--------------|--------------|---------------|------------|
| <b>11</b> | 10.03       | 0.1103       | 22.76        | 0.2276        | 0.00       |
| <b>12</b> | 12.02       | 0.1202       | 18.83        | 0.1883        | 0.17       |
| <b>13</b> | 13.46       | 0.1346       | 12.42        | 0.1242        | 0.40       |
| <b>15</b> | 5.30        | 0.0530       | 37.70        | 0.3770        | -0.49      |
| <b>16</b> | 2.04        | 0.0204       | 10.56        | 0.1056        | -0.35      |
| <b>17</b> | 2.84        | 0.0284       | 8.79         | 0.0879        | -0.13      |
| <b>18</b> | 0.71        | 0.0071       | 46.02        | 0.4602        | -1.45      |
| <b>24</b> | 16.31       | 0.1631       | 3.96         | 0.0396        | 0.975      |
| <b>26</b> | 7.04        | 0.0704       | 1.10         | 0.0110        | 1.17       |
| <b>28</b> | 3.59        | 0.0359       | 0.19         | 0.0019        | 1.64       |

Log *P* <sup>19</sup>F NMR spectra  
Compound 11

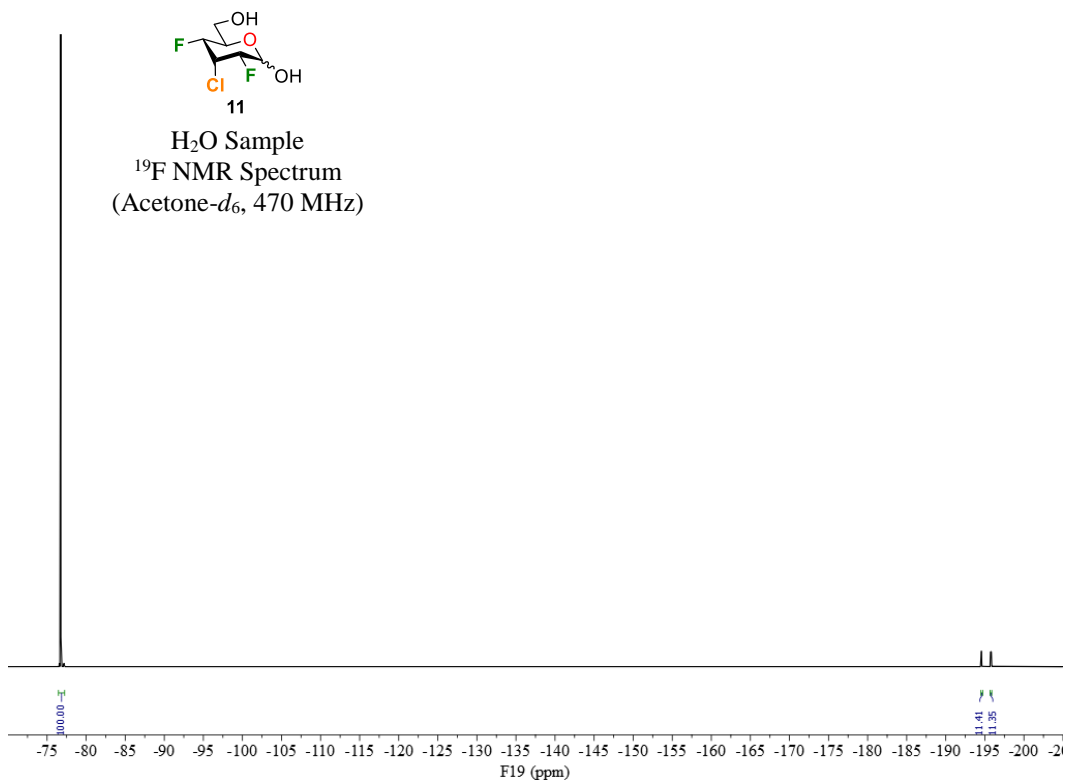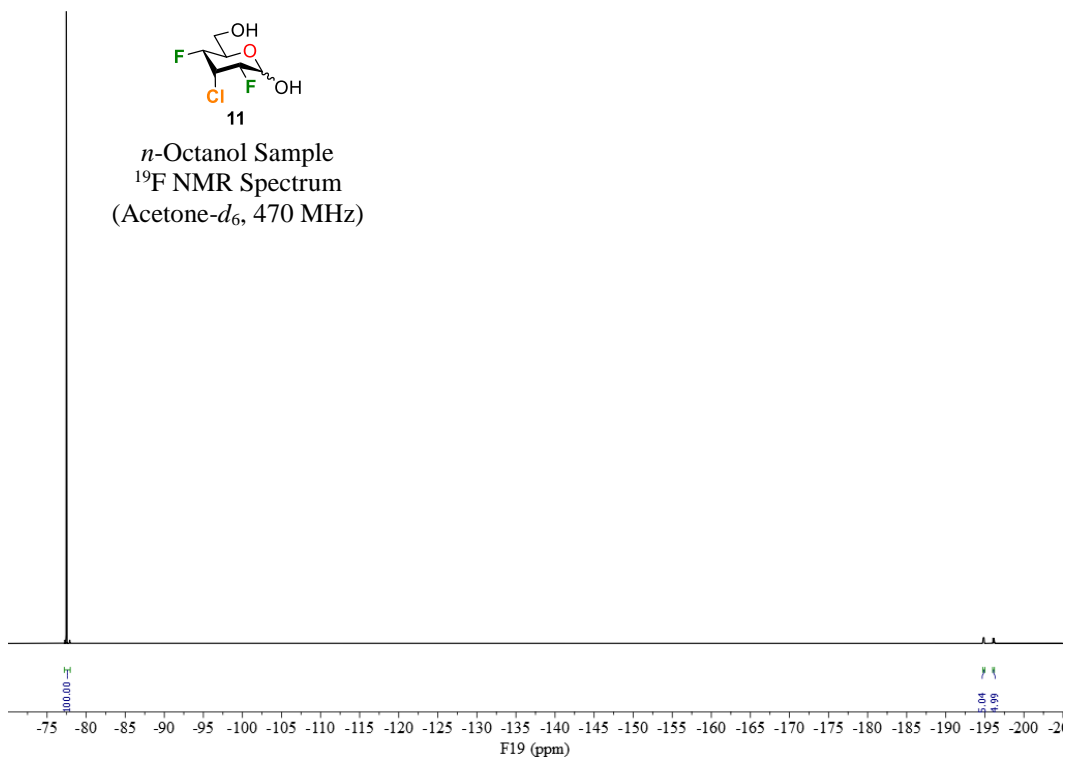

# Compound 12

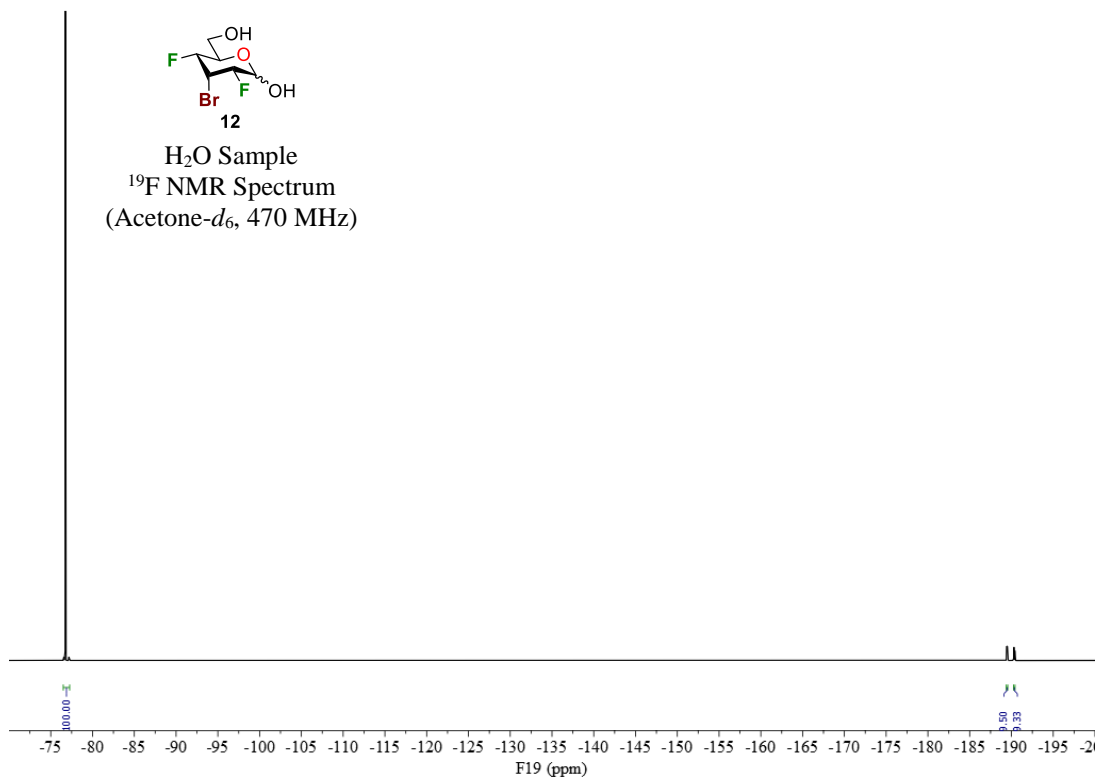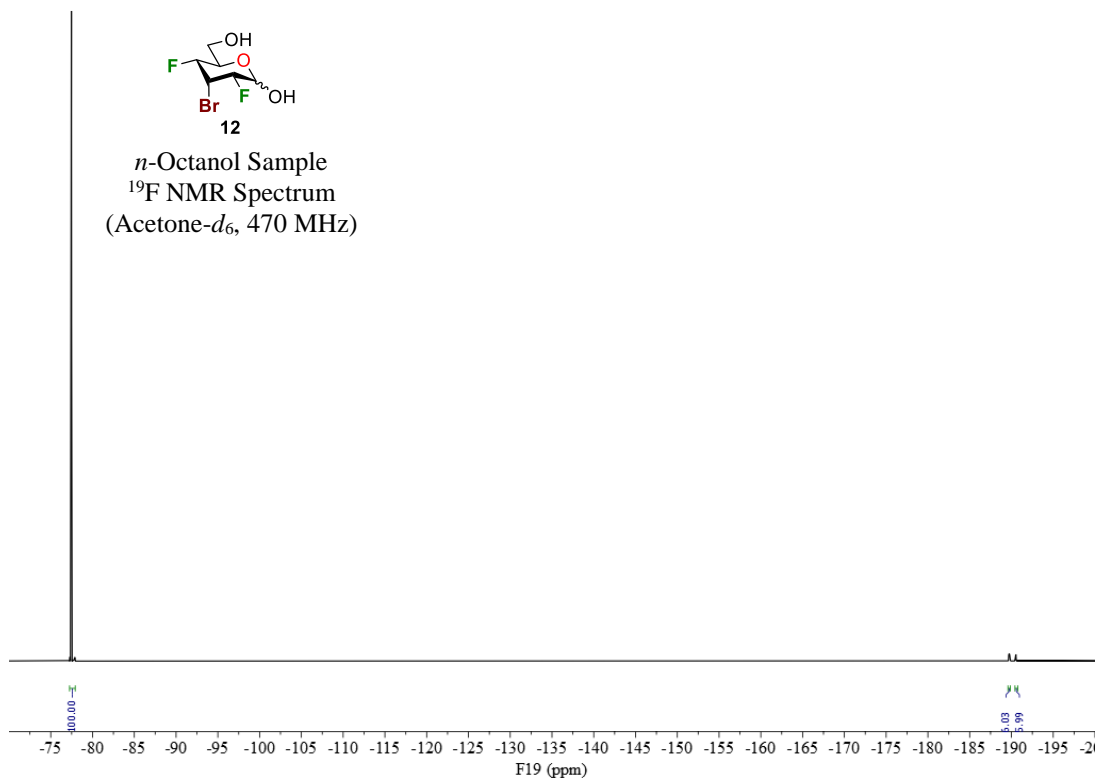



# Compound 13

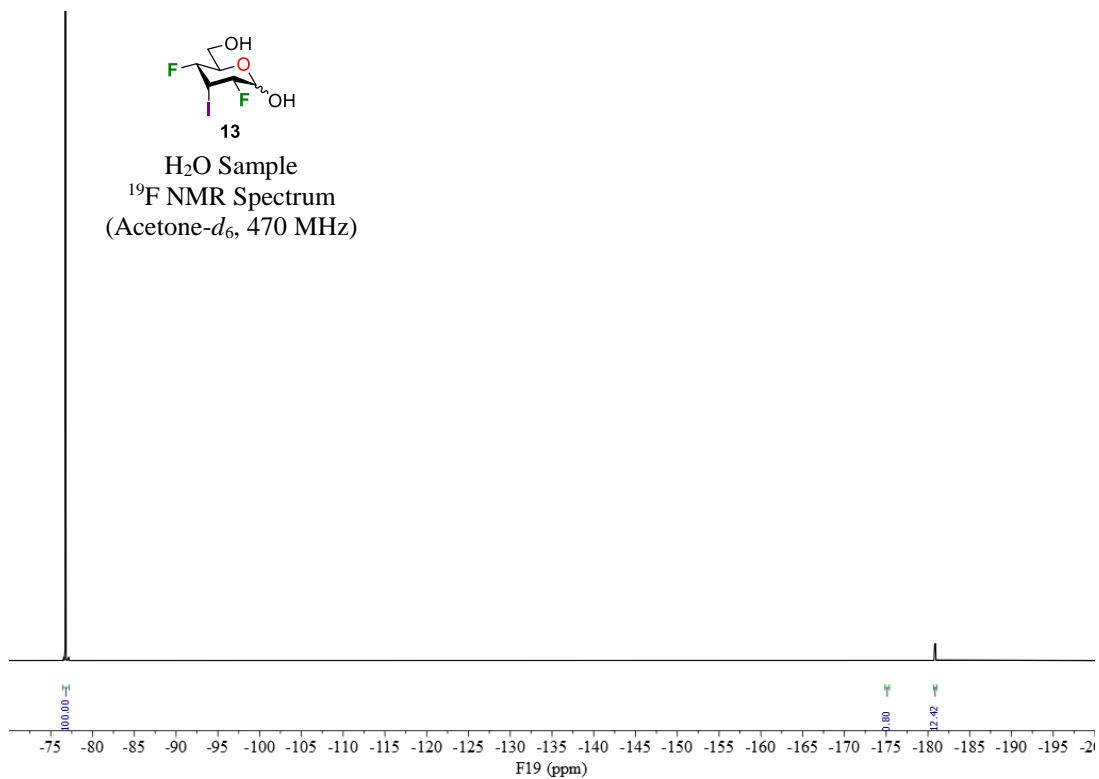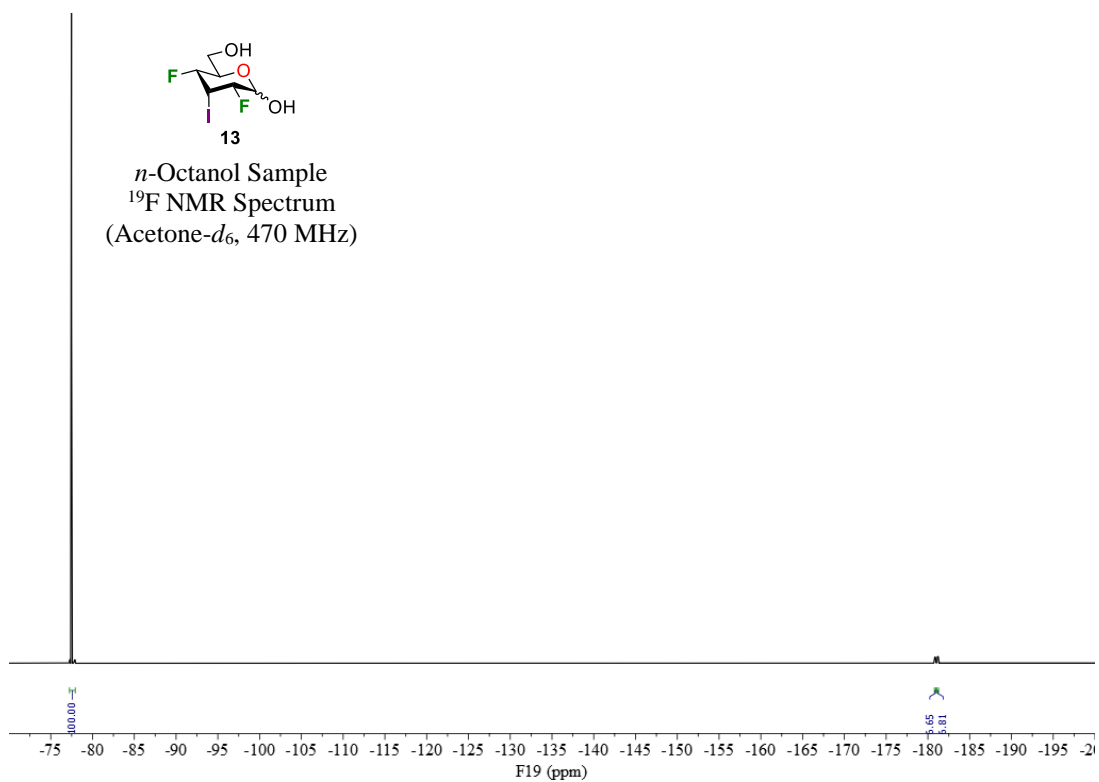

# Compound 15

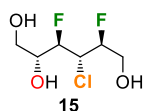

H<sub>2</sub>O Sample  
<sup>19</sup>F NMR Spectrum  
(Acetone-*d*<sub>6</sub>, 470 MHz)

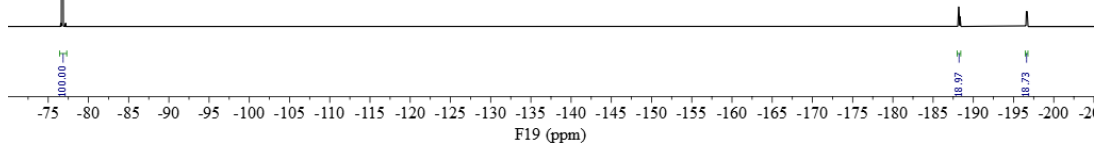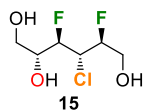

*n*-Octanol Sample  
<sup>19</sup>F NMR Spectrum  
(Acetone-*d*<sub>6</sub>, 470 MHz)

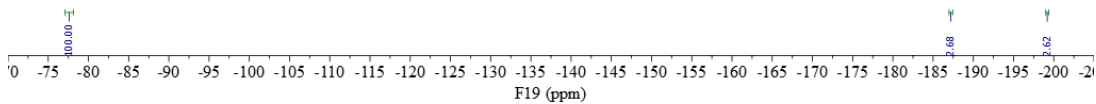

# Compound 16

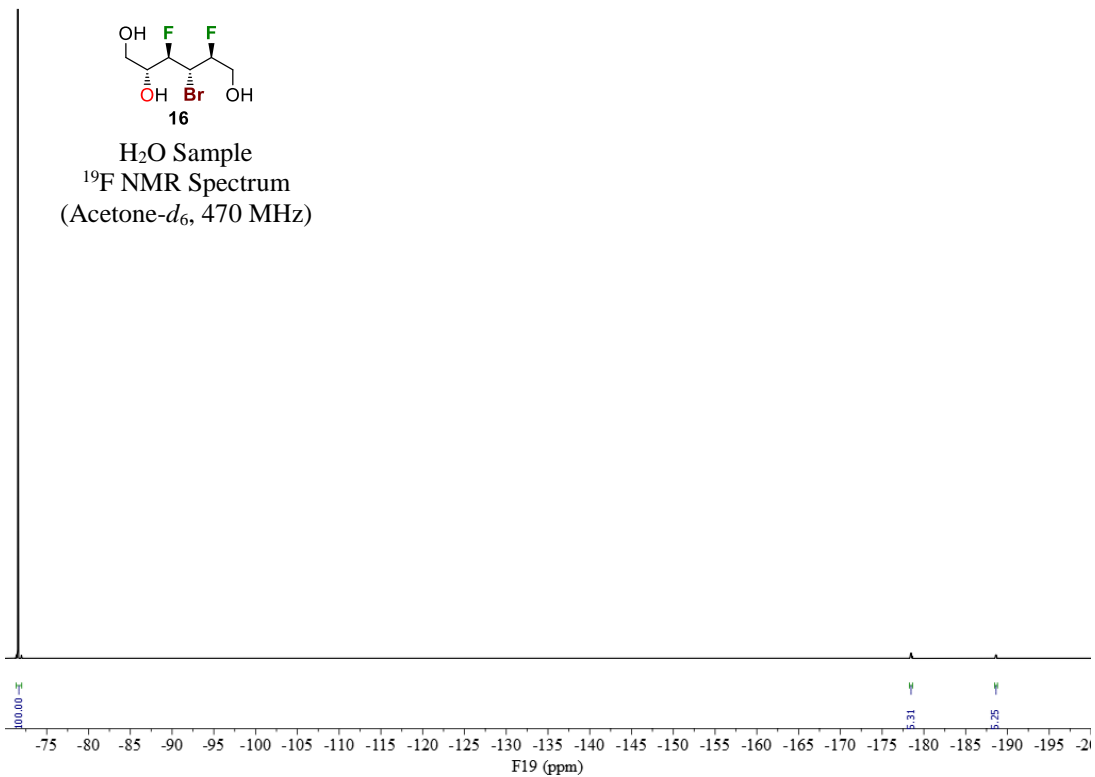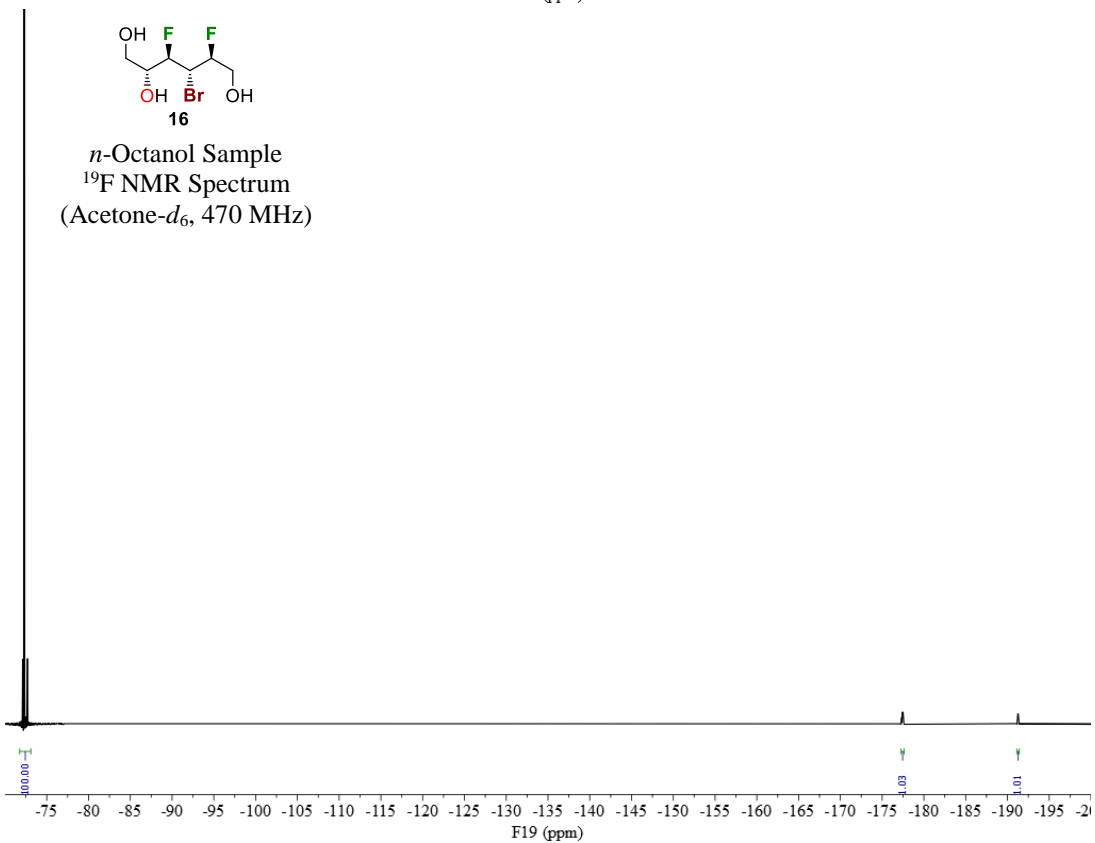

# Compound 17

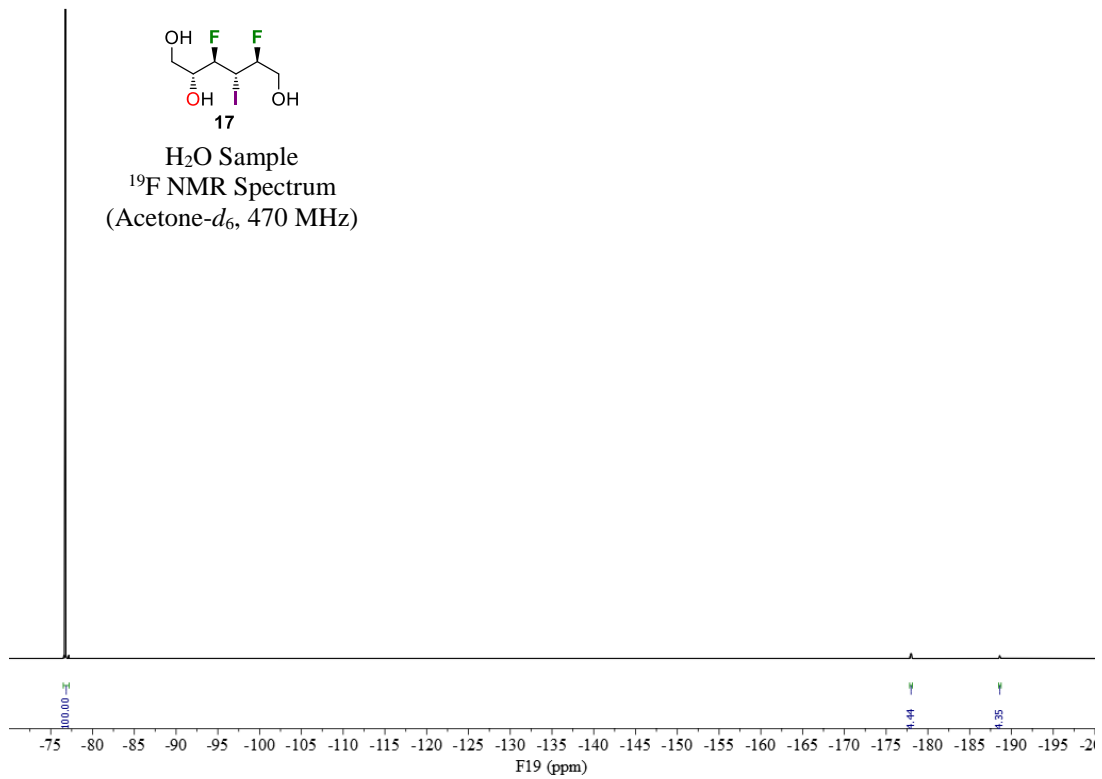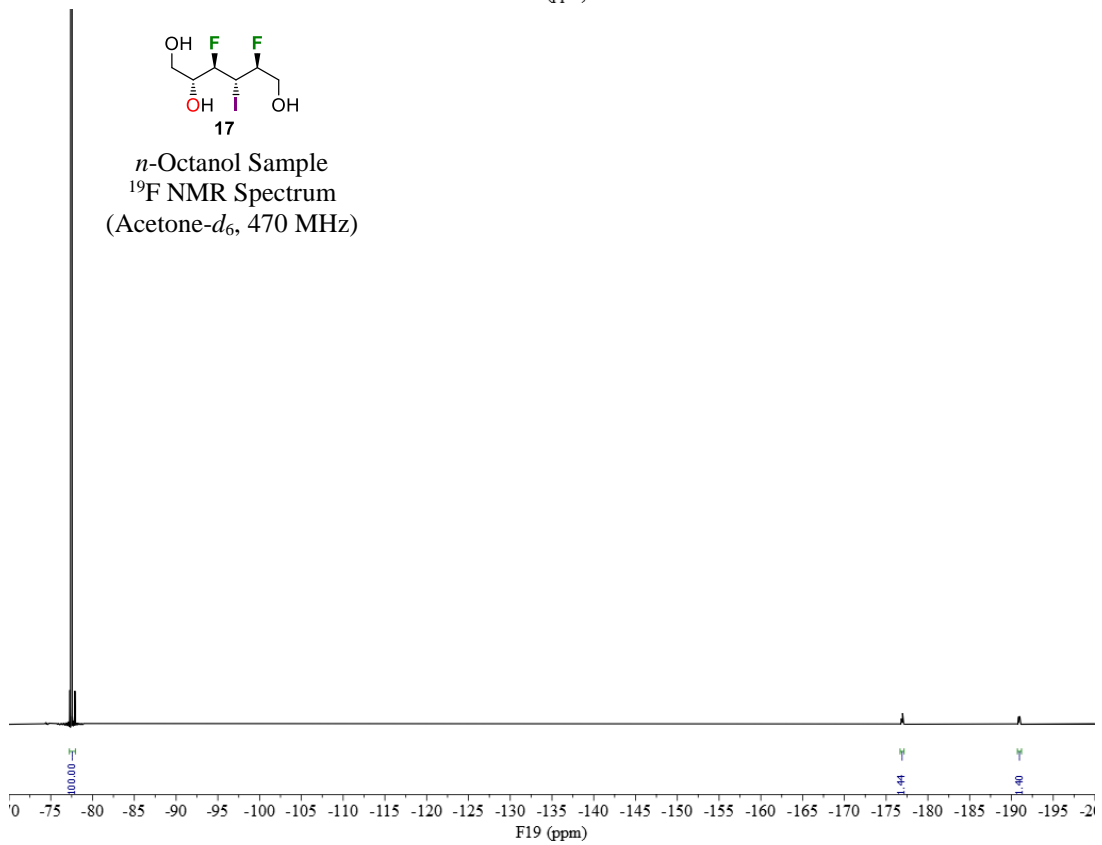

# Compound 18

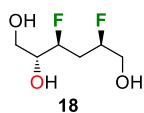

H<sub>2</sub>O Sample  
<sup>19</sup>F NMR Spectrum  
(Acetone-*d*<sub>6</sub>, 470 MHz)

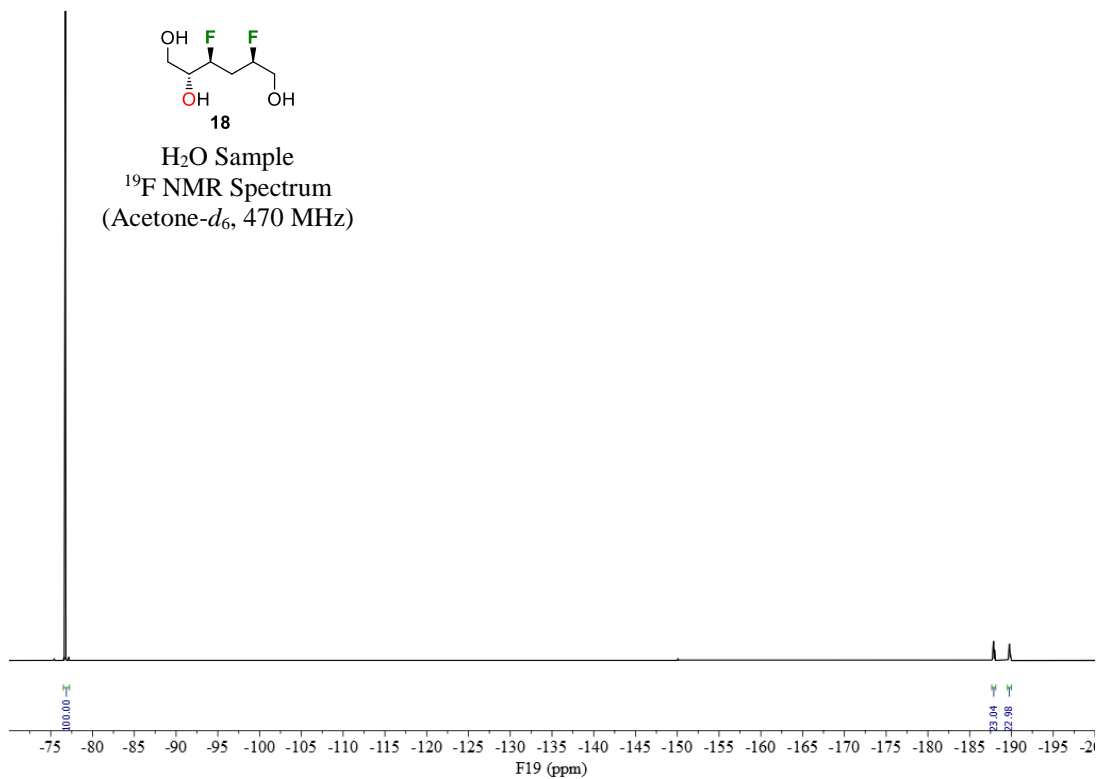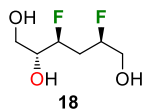

*n*-Octanol Sample  
<sup>19</sup>F NMR Spectrum  
(Acetone-*d*<sub>6</sub>, 470 MHz)

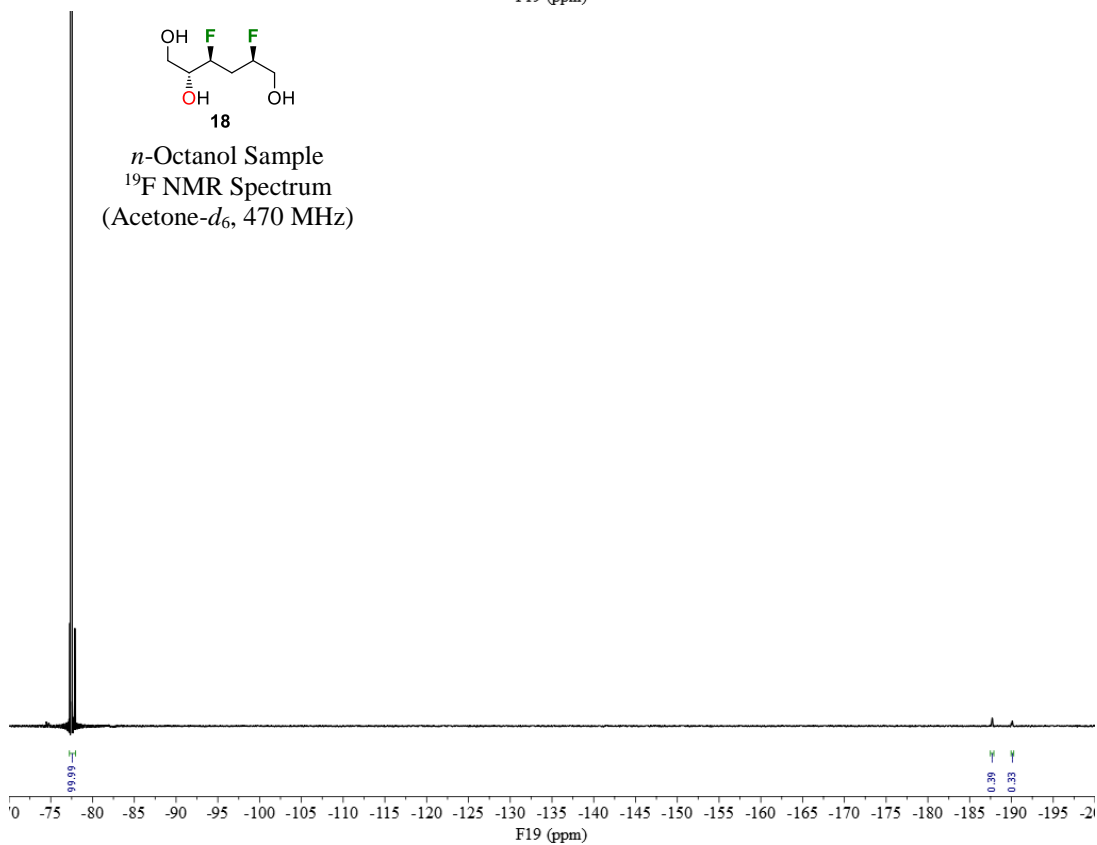

# Compound 24

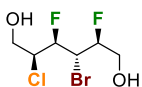

24

H<sub>2</sub>O Sample  
<sup>19</sup>F NMR Spectrum  
(Acetone-*d*<sub>6</sub>, 470 MHz)

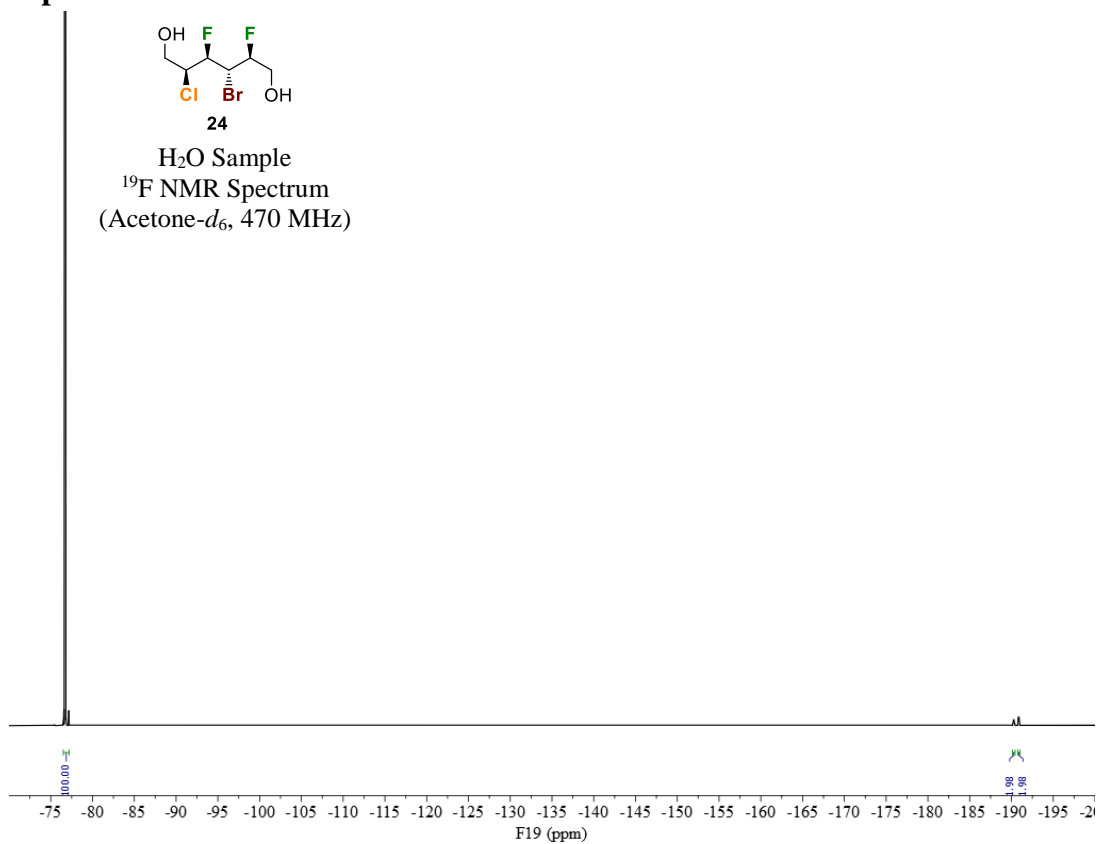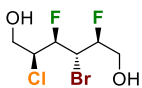

24

*n*-Octanol Sample  
<sup>19</sup>F NMR Spectrum  
(Acetone-*d*<sub>6</sub>, 470 MHz)

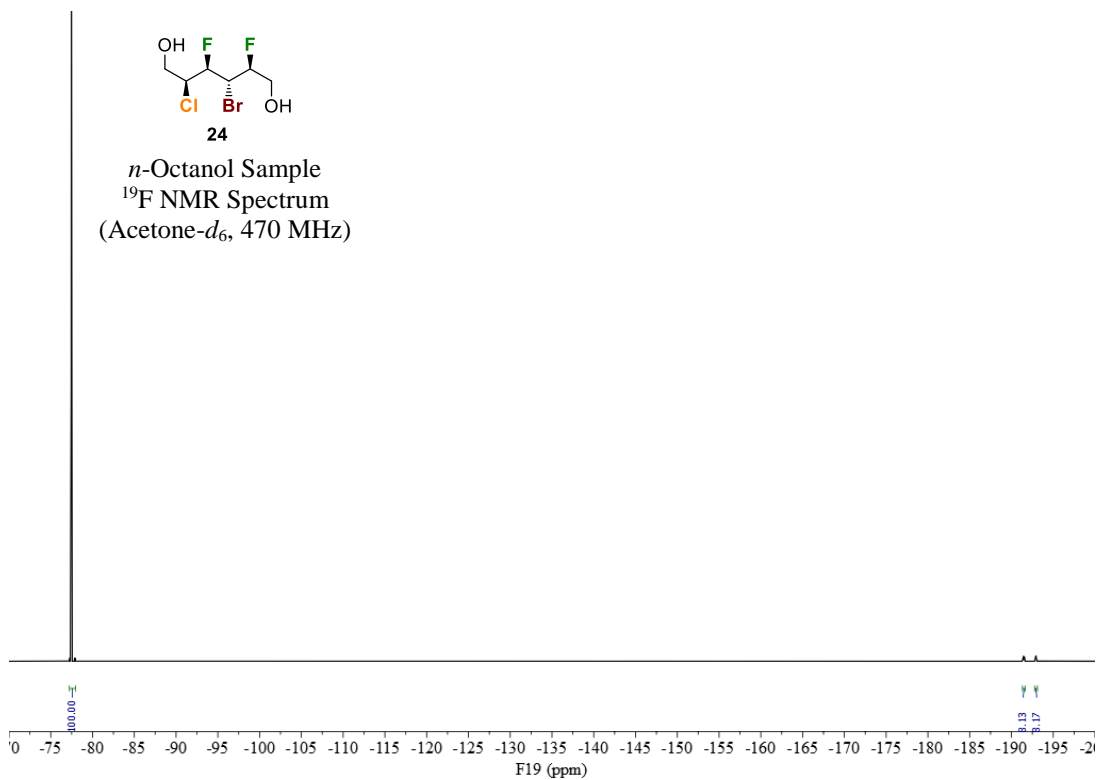

# Compound 26

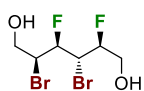

26

H<sub>2</sub>O Sample  
<sup>19</sup>F NMR Spectrum  
(Acetone-*d*<sub>6</sub>, 470 MHz)

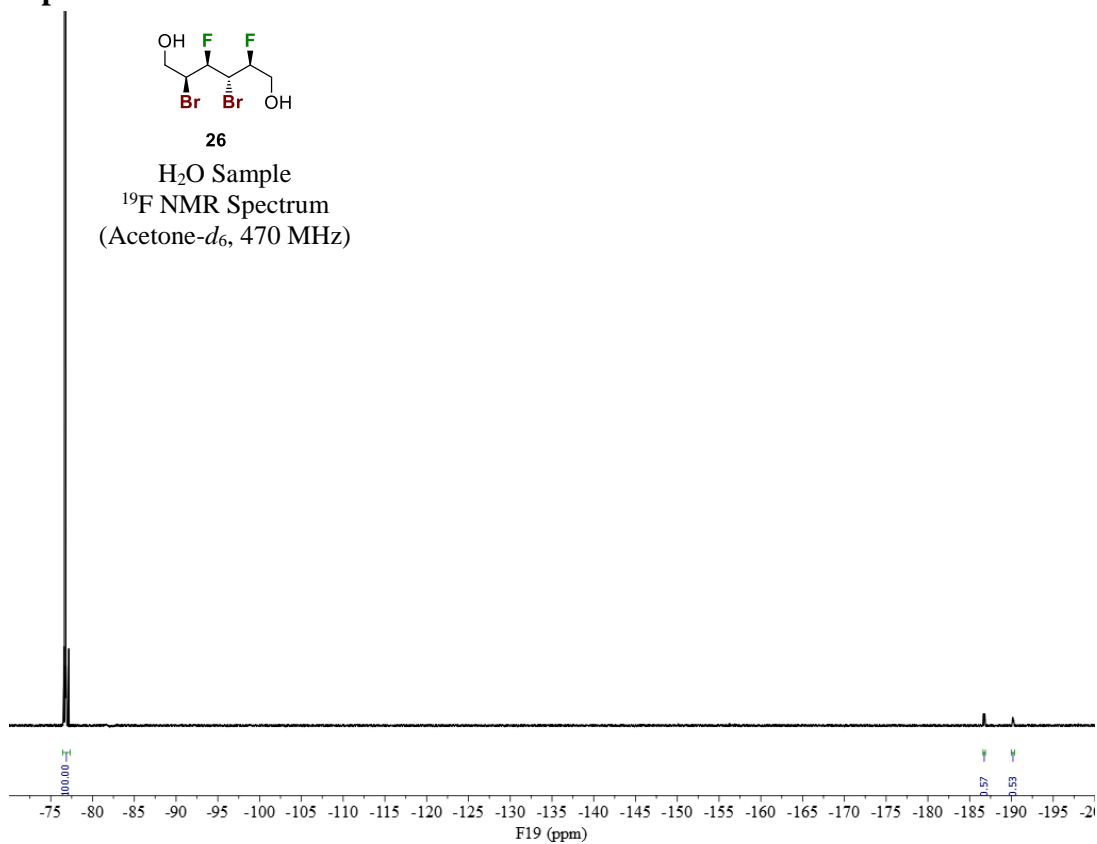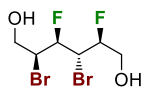

26

*n*-Octanol Sample  
<sup>19</sup>F NMR Spectrum  
(Acetone-*d*<sub>6</sub>, 470 MHz)

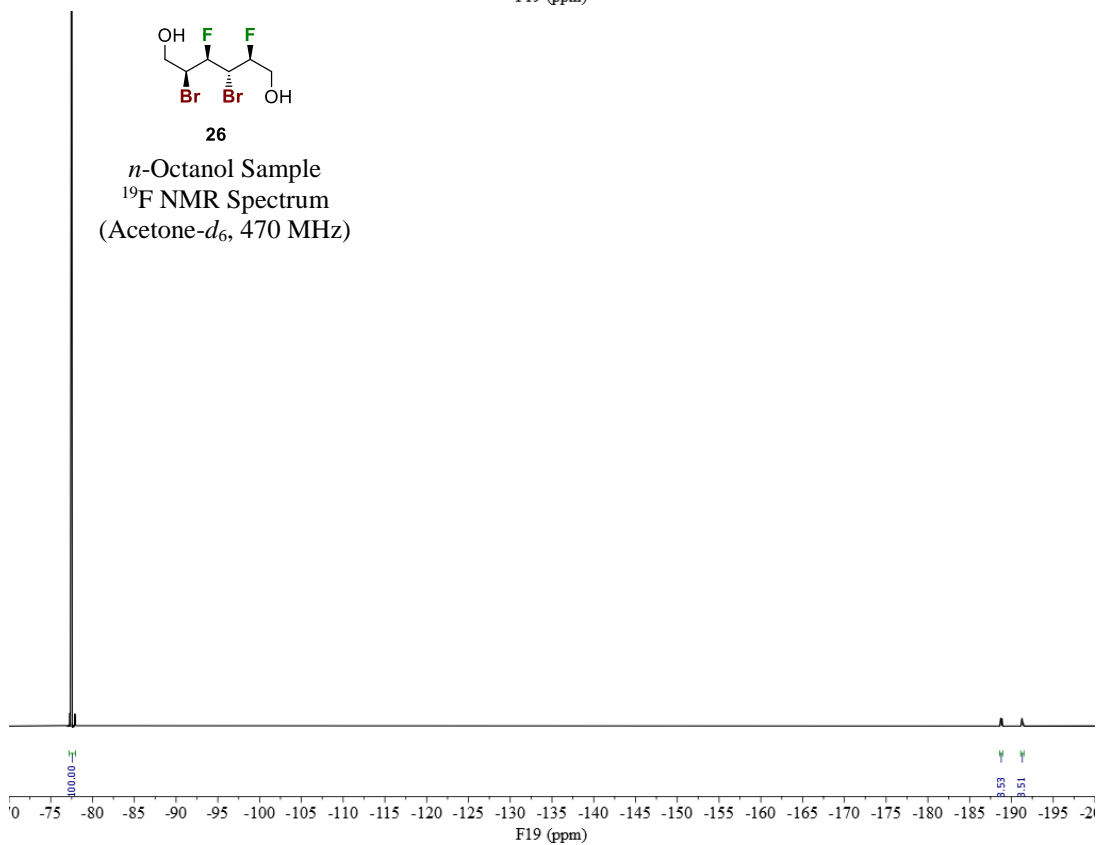

# Compound 28

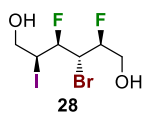

H<sub>2</sub>O Sample  
<sup>19</sup>F NMR Spectrum  
(Acetone-*d*<sub>6</sub>, 470 MHz)

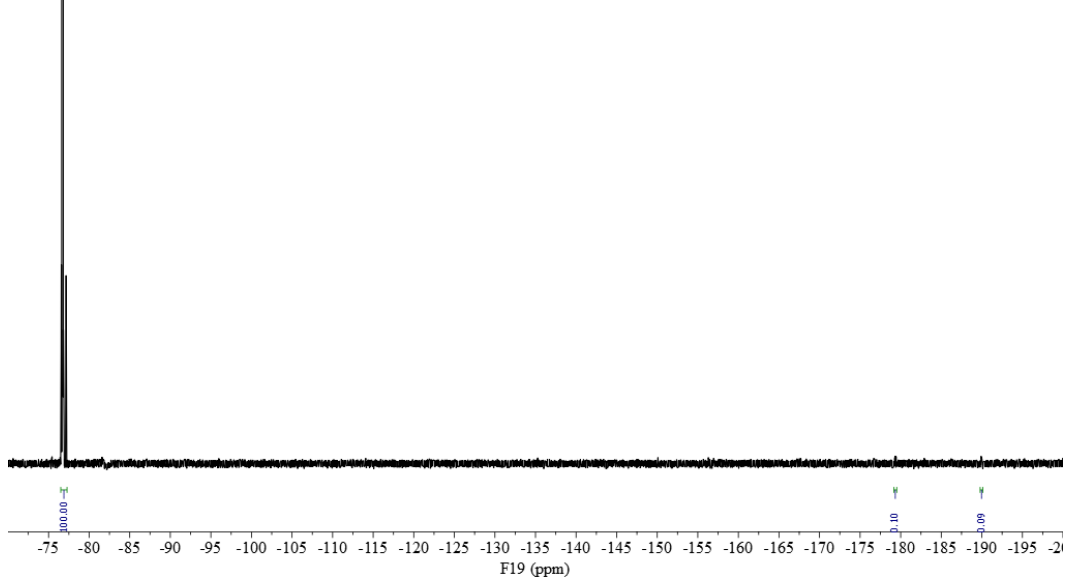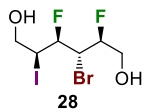

*n*-Octanol Sample  
<sup>19</sup>F NMR Spectrum  
(Acetone-*d*<sub>6</sub>, 470 MHz)

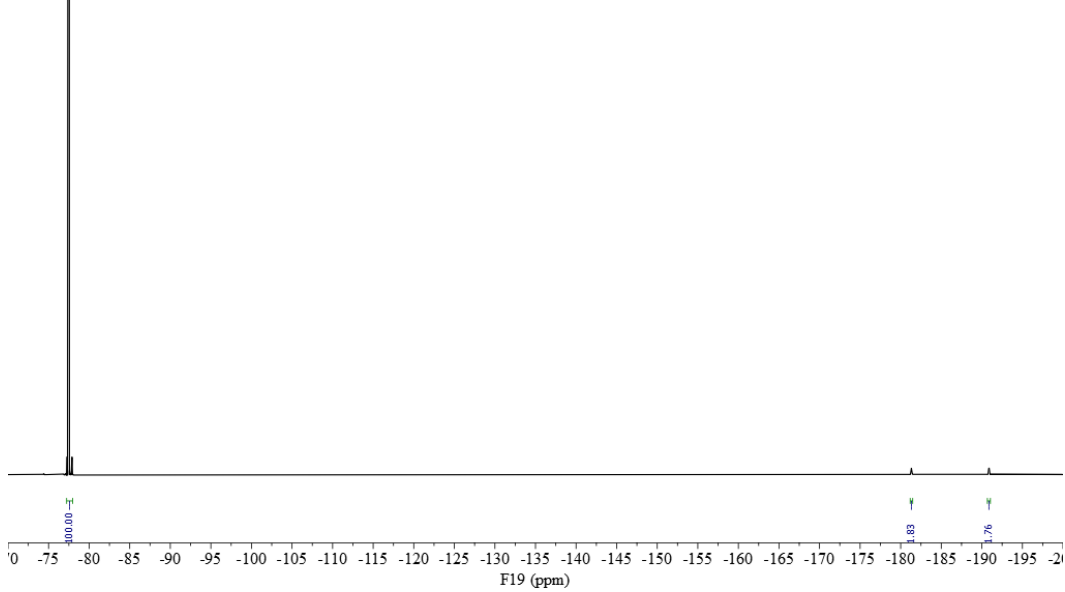



## VI. Density functional theory calculations on Pitolisant and analogues

**Table S6.** Thermochemistry of Pitolisant analogues in vacuum (B3LYP/6-31+G\*)

| Compound   | Dipole moment<br>(D) |           |          |         |
|------------|----------------------|-----------|----------|---------|
|            | X                    | Y         | Z        | Total   |
| Pitolisant | -1.54814             | 0.556954  | 1.96880  | 2.56576 |
| <b>36</b>  | -1.02685             | -0.563209 | -3.04759 | 3.26488 |
| <b>37</b>  | -1.19564             | -0.503006 | -2.86493 | 3.14452 |

**Table S7.** Optimized geometry of Pitolisant in vacuum (B3LYP/6-31+G\*)

| Center Number | Atomic Number | Atomic Type | Coordinates<br>(Å) |              |              |
|---------------|---------------|-------------|--------------------|--------------|--------------|
|               |               |             | X                  | Y            | Z            |
| <b>1</b>      | 6             | 0           | -7.517217000       | 1.915124000  | -0.000123000 |
| <b>2</b>      | 6             | 0           | -7.242639000       | 1.083479000  | -1.261527000 |
| <b>3</b>      | 6             | 0           | -5.838300000       | 0.468788000  | -1.214683000 |
| <b>4</b>      | 7             | 0           | -5.662949000       | -0.327443000 | 0.000004000  |
| <b>5</b>      | 6             | 0           | -5.838367000       | 0.468873000  | 1.214628000  |
| <b>6</b>      | 6             | 0           | -7.242710000       | 1.083561000  | 1.261352000  |
| <b>7</b>      | 1             | 0           | -5.683788000       | -0.188245000 | -2.079949000 |
| <b>8</b>      | 1             | 0           | -5.088357000       | 1.283651000  | -1.287810000 |
| <b>9</b>      | 1             | 0           | -5.683900000       | -0.188101000 | 2.079947000  |
| <b>10</b>     | 1             | 0           | -5.088430000       | 1.283742000  | 1.287738000  |
| <b>11</b>     | 6             | 0           | -4.476808000       | -1.182234000 | 0.000067000  |
| <b>12</b>     | 1             | 0           | -4.548381000       | -1.836353000 | 0.880816000  |
| <b>13</b>     | 1             | 0           | -4.548339000       | -1.836415000 | -0.880639000 |
| <b>14</b>     | 6             | 0           | -3.098784000       | -0.484468000 | 0.000073000  |
| <b>15</b>     | 1             | 0           | -2.992983000       | 0.159083000  | -0.881858000 |
| <b>16</b>     | 1             | 0           | -2.993012000       | 0.159125000  | 0.881976000  |
| <b>17</b>     | 6             | 0           | -1.960587000       | -1.496759000 | 0.000119000  |
| <b>18</b>     | 1             | 0           | -2.021828000       | -2.148656000 | 0.889486000  |
| <b>19</b>     | 1             | 0           | -2.021793000       | -2.148694000 | -0.889221000 |
| <b>20</b>     | 8             | 0           | -0.720802000       | -0.802052000 | 0.000127000  |
| <b>21</b>     | 6             | 0           | 0.408293000        | -1.660636000 | 0.000048000  |
| <b>22</b>     | 1             | 0           | 0.383481000        | -2.315052000 | 0.889534000  |
| <b>23</b>     | 1             | 0           | 0.383442000        | -2.314933000 | -0.889522000 |
| <b>24</b>     | 6             | 0           | 1.673102000        | -0.809740000 | 0.000078000  |
| <b>25</b>     | 1             | 0           | 1.662607000        | -0.154829000 | -0.880259000 |
| <b>26</b>     | 1             | 0           | 1.662639000        | -0.154939000 | 0.880496000  |
| <b>27</b>     | 6             | 0           | 2.954368000        | -1.668357000 | -0.000003000 |

|    |    |   |              |              |              |
|----|----|---|--------------|--------------|--------------|
| 28 | 1  | 0 | 2.949514000  | -2.325774000 | 0.880020000  |
| 29 | 1  | 0 | 2.949459000  | -2.325695000 | -0.880083000 |
| 30 | 6  | 0 | 5.965876000  | 0.364896000  | 1.213096000  |
| 31 | 6  | 0 | 6.531546000  | 0.756372000  | -0.000025000 |
| 32 | 6  | 0 | 4.816788000  | -0.428956000 | 1.201600000  |
| 33 | 1  | 0 | 4.380441000  | -0.736831000 | 2.149721000  |
| 34 | 6  | 0 | 5.966090000  | 0.364567000  | -1.213136000 |
| 35 | 6  | 0 | 4.220765000  | -0.837928000 | -0.000011000 |
| 36 | 1  | 0 | 6.418953000  | 0.670976000  | -2.150830000 |
| 37 | 6  | 0 | 4.816998000  | -0.429283000 | -1.201626000 |
| 38 | 1  | 0 | 4.380816000  | -0.737415000 | -2.149740000 |
| 39 | 1  | 0 | 6.418576000  | 0.671559000  | 2.150785000  |
| 40 | 17 | 0 | 7.983080000  | 1.753323000  | -0.000032000 |
| 41 | 1  | 0 | -7.340085000 | 1.703684000  | -2.162489000 |
| 42 | 1  | 0 | -6.863343000 | 2.800802000  | -0.000133000 |
| 43 | 1  | 0 | -7.340212000 | 1.703827000  | 2.162268000  |
| 44 | 1  | 0 | -7.980525000 | 0.273474000  | -1.338551000 |
| 45 | 1  | 0 | -8.550148000 | 2.286691000  | -0.000164000 |
| 46 | 1  | 0 | -7.980598000 | 0.273559000  | 1.338388000  |

**Table S8.** Optimized geometry of compound **36** in vacuum (B3LYP/6-31+G\*)

| Center Number | Atomic Number | Atomic Type | Coordinates (Å) |              |              |
|---------------|---------------|-------------|-----------------|--------------|--------------|
|               |               |             | X               | Y            | Z            |
| 1             | 6             | 0           | -6.512364000    | 1.570658000  | 0.003918000  |
| 2             | 6             | 0           | -6.185147000    | 0.810506000  | -1.276089000 |
| 3             | 6             | 0           | -4.745031000    | 0.293278000  | -1.213823000 |
| 4             | 7             | 0           | -4.522979000    | -0.475604000 | -0.001394000 |
| 5             | 6             | 0           | -4.747077000    | 0.284990000  | 1.215874000  |
| 6             | 6             | 0           | -6.187318000    | 0.801739000  | 1.279232000  |
| 7             | 1             | 0           | -5.890275000    | 2.477523000  | 0.007560000  |
| 8             | 1             | 0           | -6.316621000    | 1.472616000  | -2.140134000 |
| 9             | 9             | 0           | -7.066409000    | -0.255858000 | -1.455851000 |
| 10            | 1             | 0           | -4.573715000    | -0.351370000 | -2.082315000 |
| 11            | 1             | 0           | -4.065839000    | 1.166954000  | -1.312592000 |
| 12            | 1             | 0           | -4.577197000    | -0.365562000 | 2.080233000  |
| 13            | 1             | 0           | -4.068094000    | 1.158001000  | 1.321758000  |
| 14            | 1             | 0           | -6.320301000    | 1.457891000  | 2.147580000  |
| 15            | 9             | 0           | -7.068843000    | -0.265863000 | 1.450139000  |
| 16            | 6             | 0           | -3.338684000    | -1.329789000 | -0.003345000 |

|    |    |   |              |              |              |
|----|----|---|--------------|--------------|--------------|
| 17 | 1  | 0 | -3.411734000 | -1.986527000 | 0.874167000  |
| 18 | 1  | 0 | -3.410698000 | -1.981112000 | -0.884974000 |
| 19 | 6  | 0 | -1.971440000 | -0.615032000 | -0.000394000 |
| 20 | 1  | 0 | -1.874740000 | 0.033131000  | -0.880746000 |
| 21 | 1  | 0 | -1.875960000 | 0.028288000  | 0.883638000  |
| 22 | 6  | 0 | -0.815186000 | -1.607739000 | -0.002394000 |
| 23 | 1  | 0 | -0.865934000 | -2.262394000 | 0.885379000  |
| 24 | 1  | 0 | -0.865508000 | -2.258288000 | -0.893207000 |
| 25 | 8  | 0 | 0.407727000  | -0.886993000 | -0.000467000 |
| 26 | 6  | 0 | 1.557015000  | -1.721213000 | -0.001998000 |
| 27 | 1  | 0 | 1.545557000  | -2.376793000 | 0.886460000  |
| 28 | 1  | 0 | 1.545455000  | -2.373663000 | -0.892755000 |
| 29 | 6  | 0 | 2.801940000  | -0.841942000 | -0.000562000 |
| 30 | 1  | 0 | 2.776811000  | -0.186139000 | -0.879936000 |
| 31 | 1  | 0 | 2.776884000  | -0.189053000 | 0.880980000  |
| 32 | 6  | 0 | 4.102396000  | -1.671287000 | -0.001985000 |
| 33 | 1  | 0 | 4.112755000  | -2.329837000 | 0.877099000  |
| 34 | 1  | 0 | 4.112463000  | -2.327263000 | -0.883000000 |
| 35 | 6  | 0 | 7.065573000  | 0.430084000  | 1.213680000  |
| 36 | 6  | 0 | 7.621108000  | 0.837433000  | 0.001045000  |
| 37 | 6  | 0 | 5.935716000  | -0.390863000 | 1.201252000  |
| 38 | 1  | 0 | 5.507770000  | -0.711332000 | 2.149041000  |
| 39 | 6  | 0 | 7.064584000  | 0.434366000  | -1.212573000 |
| 40 | 6  | 0 | 5.349025000  | -0.811333000 | -0.000940000 |
| 41 | 1  | 0 | 7.509851000  | 0.752863000  | -2.149863000 |
| 42 | 6  | 0 | 5.934741000  | -0.386614000 | -1.202124000 |
| 43 | 1  | 0 | 5.506026000  | -0.703740000 | -2.150691000 |
| 44 | 1  | 0 | 7.511596000  | 0.745276000  | 2.151727000  |
| 45 | 17 | 0 | 9.048037000  | 1.868595000  | 0.002278000  |
| 46 | 9  | 0 | -7.840887000 | 1.993512000  | 0.004238000  |

**Table S9.** Optimized cartesian coordinates of compound **37** in vacuum (B3LYP/6-31+G\*)

| Center Number | Atomic Number | Atomic Type | Coordinates (Å) |              |              |
|---------------|---------------|-------------|-----------------|--------------|--------------|
|               |               |             | X               | Y            | Z            |
| 1             | 6             | 0           | 5.522894000     | 0.944885000  | -0.000184000 |
| 2             | 6             | 0           | 5.152138000     | 0.202565000  | 1.279030000  |
| 3             | 6             | 0           | 3.683090000     | -0.230185000 | 1.212171000  |
| 4             | 7             | 0           | 3.416616000     | -0.983104000 | 0.000161000  |
| 5             | 6             | 0           | 3.683170000     | -0.230707000 | -1.212156000 |

|    |    |   |              |              |              |
|----|----|---|--------------|--------------|--------------|
| 6  | 6  | 0 | 5.152222000  | 0.202013000  | -1.279103000 |
| 7  | 35 | 0 | 7.397875000  | 1.530147000  | -0.000250000 |
| 8  | 1  | 0 | 4.953616000  | 1.879555000  | -0.000406000 |
| 9  | 1  | 0 | 5.311027000  | 0.855162000  | 2.144675000  |
| 10 | 9  | 0 | 5.961903000  | -0.917189000 | 1.467932000  |
| 11 | 1  | 0 | 3.473437000  | -0.863252000 | 2.081034000  |
| 12 | 1  | 0 | 3.059580000  | 0.684080000  | 1.309967000  |
| 13 | 1  | 0 | 3.473575000  | -0.864147000 | -2.080761000 |
| 14 | 1  | 0 | 3.059667000  | 0.683517000  | -1.310388000 |
| 15 | 1  | 0 | 5.311173000  | 0.854237000  | -2.145018000 |
| 16 | 9  | 0 | 5.961998000  | -0.917825000 | -1.467467000 |
| 17 | 6  | 0 | 2.181431000  | -1.761977000 | 0.000289000  |
| 18 | 1  | 0 | 2.213171000  | -2.419353000 | -0.879194000 |
| 19 | 1  | 0 | 2.213131000  | -2.419003000 | 0.880037000  |
| 20 | 6  | 0 | 0.862237000  | -0.962483000 | 0.000101000  |
| 21 | 1  | 0 | 0.806865000  | -0.311843000 | 0.882163000  |
| 22 | 1  | 0 | 0.806914000  | -0.312171000 | -0.882206000 |
| 23 | 6  | 0 | -0.353481000 | -1.881223000 | 0.000242000  |
| 24 | 1  | 0 | -0.343240000 | -2.535940000 | -0.888902000 |
| 25 | 1  | 0 | -0.343258000 | -2.535644000 | 0.889604000  |
| 26 | 8  | 0 | -1.529754000 | -1.086916000 | 0.000099000  |
| 27 | 6  | 0 | -2.727612000 | -1.849848000 | 0.000206000  |
| 28 | 1  | 0 | -2.755744000 | -2.503486000 | -0.889306000 |
| 29 | 1  | 0 | -2.755744000 | -2.503238000 | 0.889901000  |
| 30 | 6  | 0 | -3.916856000 | -0.896699000 | 0.000077000  |
| 31 | 1  | 0 | -3.852125000 | -0.244940000 | 0.880430000  |
| 32 | 1  | 0 | -3.852161000 | -0.245204000 | -0.880474000 |
| 33 | 6  | 0 | -5.265115000 | -1.645774000 | 0.000208000  |
| 34 | 1  | 0 | -5.315103000 | -2.301348000 | -0.879743000 |
| 35 | 1  | 0 | -5.315064000 | -2.301103000 | 0.880349000  |
| 36 | 6  | 0 | -8.095840000 | 0.632058000  | -1.213194000 |
| 37 | 6  | 0 | -8.626024000 | 1.070672000  | -0.000116000 |
| 38 | 6  | 0 | -7.017519000 | -0.255509000 | -1.201651000 |
| 39 | 1  | 0 | -6.609518000 | -0.600071000 | -2.149782000 |
| 40 | 6  | 0 | -8.095023000 | 0.633335000  | 1.213073000  |
| 41 | 6  | 0 | -6.457490000 | -0.712060000 | 0.000096000  |
| 42 | 1  | 0 | -8.520464000 | 0.976946000  | 2.150701000  |
| 43 | 6  | 0 | -7.016715000 | -0.254240000 | 1.201743000  |
| 44 | 1  | 0 | -6.608081000 | -0.597806000 | 2.149964000  |
| 45 | 1  | 0 | -8.521906000 | 0.974681000  | -2.150899000 |

|           |  |    |   |              |             |              |
|-----------|--|----|---|--------------|-------------|--------------|
| <b>46</b> |  | 17 | 0 | -9.988340000 | 2.185793000 | -0.000241000 |
|-----------|--|----|---|--------------|-------------|--------------|

## VII. References

---

<sup>1</sup> Denavit, V.; Lainé, D.; St-Gelais, J.; Johnson, P. A.; Giguère, D. *Nat. Commun.* **2018**, *9*, 4721.

<sup>2</sup> Lainé, D.; Lessard, O.; St-Gelais, J.; Giguère, D. *Chem. Eur. J.* **2021**, *27*, 3799-3805.

<sup>3</sup> Wolf, N.; Kersting, L.; Herok, C.; Mihm, C.; Seibel, J. *J. Org. Chem.* **2020**, *85*, 9751-9760.

<sup>4</sup> Goosen, A.; Marais, C. F.; McClelland, C. W.; Rinaldi, F. C. *J. Chem. Soc., Perkin Trans. 2* **1995**, 1227-1236.

<sup>5</sup> Linclau, B.; Wang, Z.; Compain, G.; Paumelle, V.; Fontenelle, C. Q.; Wells, N.; Weymouth-Wilson, A. *Angew. Chem. Int. Ed.* **2016**, *55*, 674-678.
